# Supplementary material for: Post-transcriptional repression of GSNOR by microRNAs regulates S-nitrosylation and fuels breast cancer progression
Source: Research Square preprint supplement (doi:10.21203/rs.3.rs-8532436/v1), 2026-01-21
Supplement: Supplementary file 1 [file 9849f4036c490b37956745d0.xlsx]

## Sheet: Figure 1
D	a.u. densitometry GSNOR/Actin
	Normal	Breast Cancer											Column B	Breast Cancer
	3.45325	0.727296											vs.	vs,
	2.27525	0.627263											Column A	Normal
	2.61185	0.348215
	1.86404	0.416056											Paired t test
	0.746133	0.105458											P value	0.0022
	3.23574	0.197726											P value summary	**
	1.80181	1.88592											Significantly different (P < 0.05)?	Yes
	1.62398	1.60562											One- or two-tailed P value?	Two-tailed
	1.05313	0.0708819											t, df	t=4,243, df=9
	3.10093	0.179811											Number of pairs	10
E	Normal		Breast Cancer										Column B	Breast Cancer
	1.27015	1.15936	0.622006	0.179659									vs.	vs,
	0.317538	0.786399	0.235696	0.100365									Column A	Normal
	1.53156	1.15136	0.461691	0.0714627
	3.19319	1.58374	0.541488	0.0526776									Paired t test
	0.130761	0.323836	0.466517	0.6846									P value	0.0182
	5.30861	4.38223	0.0503569	0.243445									P value summary	*
	1.94306	2.31605	0.0226921	0.228722									Significantly different (P < 0.05)?	Yes
	1.22972	1.30285	0.0230089	0.660517									One- or two-tailed P value?	Two-tailed
	0.0558745	0.29152	0.041762	0.146774									t, df	t=2,879, df=9
	2.09701	0.727827	0.0966111	0.314617									Number of pairs	10
F
	GSNOR activity
	Breast Tissue		Breast Cancer										Column A	Breast Tissue
	15.357	10.8958	16.0471	15.6267									vs.	vs,
	35.2162	25.4267	14.6962	14.1538									Column B	Breast Cancer
	31.9673	22.0155	9.20676	10.8572
	34.9093	36.6112	13.5837	15.9583									Unpaired t test
	20.1201	21.6145	9.74748	7.91838									P value	0.0011
	9.95213	7.57419	7.34851	3.46918									P value summary	**
	30.7197	25.7925	21.7861	17.6695									Significantly different (P < 0.05)?	Yes
	24.7055	28.3554	15.8294	12.0627									One- or two-tailed P value?	Two-tailed
	36.7081	35.6675	24.6991	20.8424									t, df	t=3,603, df=32
	23.593	31.707	22.5484	16.9343
	22.4982	15.8928	7.46772	6.27339
	6.59458	4.90284	16.6087	13.0176
	35.7712	28.1103	16.6728	13.0312
	14.4558	11.8408	12.0105	10.0838
	39.75	36.4166	25.9948	21.4301
	22.2371	17.9676	12.7616	10.6469
	20.7666	19.6805	13.1392	9.55175
G	Non-Cancerous	Basal A	Basal B	Luminal	HER2 Amp		Non-Cancerous	ER+ HER2+	ER+ HER2-	ER- HER2+	ER- HER2-
	7.4065	6.78188	7.5529	6.33181	5.53201		7.4065	5.53201	6.33181	5.897	6.78188
		6.0594	7.76626	6.17692	6.12288			6.12288	6.17692	6.89676	7.5529
		5.65707	7.00977	6.08215	6.28559			4.38474	6.08215	6.36124	6.0594
		6.36124	6.31596	3.99729	5.897			6.01167	5.2891	5.99277	5.65707
		5.51223	6.67327	4.38474	6.89676			4.88264	6.20457	5.16631	5.51223
		5.6837	6.82858	4.88264	5.99277			6.29774	6.44112	7.32679	5.6837
		5.8166	7.55712	6.20457	5.2891			6.5738	6.61736	4.69655	6.25965
		5.82324	6.18626	6.44112	5.16631			5.31506	5.13175	6.91157	5.8166
		5.68089	6.96844	6.61736	6.29774			6.78372	6.20261	6.28559	5.82324
		6.97934	7.30597	6.20261	6.5738				6.54597		7.76626
		7.32679	6.77584	6.54597	5.13175				7.09307		3.99729
		4.69655		7.09307	6.35473				5.89845		5.68089
		6.91157		5.31506	6.78372						6.94521
		6.13689		6.595	6.25965						6.97934
		5.13463		5.89845	5.02148						7.00977
		6.49217									6.23611
											6.31596
											5.02148
											6.67327
											3.53481
											6.82858
											6.35473
											6.13689
											7.55712
											6.18626
											2.62059
											5.13463
											6.595
											6.96844
											6.49217
											7.30597
											6.77584

## Sheet: Figure 2
B
	MCF7											Table Analyzed	anti-mirR MCF7 (48h)			Dunnett's multiple comparisons test	Mean Diff,	95,00% CI of diff,	Below threshold?	Summary	Adjusted P Value	A-?
	Neg	antimiR 9-5	antimiR 182	antimiR 449	antimiR 455	antimiR 519						Data sets analyzed	A-F			Neg vs. antimiR 9-5	-0.3974	-0,9884 to 0,1935	No	ns	0.2618	B	antimiR 9-5
	1	1.75333	1.30949	1.65937	1.78542											Neg vs. antimiR 182	-0.2295	-0,8204 to 0,3614	No	ns	0.7272	C	antimiR 182
	1	1.29094	1.03853	1.09542	1.22389	1.77406						ANOVA summary				Neg vs. antimiR 449	-0.3528	-0,9437 to 0,2381	No	ns	0.3613	D	antimiR 449
	1	1.24379	0.970045	1.02284	2.18115	2.51418						F	6.968			Neg vs. antimiR 455	-0.7511	-1,342 to -0,1602	Yes	*	0.0106	E	antimiR 455
	1	1.30171	1.59989	1.63359	1.81388	2.3385						P value	0.001			Neg vs. antimiR 519	-1.209	-1,847 to -0,5706	Yes	***	0.0003	F	antimiR 519
												P value summary	**
												Significant diff. among means (P < 0.05)?	Yes			Test details	Mean 1	Mean 2	Mean Diff,	SE of diff,	n1	n2	q	DF
												R squared	0.6721			Neg vs. antimiR 9-5	1	1.397	-0.3974	0.2124	4	4	1.872	17
																Neg vs. antimiR 182	1	1.229	-0.2295	0.2124	4	4	1.081	17
																Neg vs. antimiR 449	1	1.353	-0.3528	0.2124	4	4	1.661	17
																Neg vs. antimiR 455	1	1.751	-0.7511	0.2124	4	4	3.537	17
																Neg vs. antimiR 519	1	2.209	-1.209	0.2294	4	3	5.271	17
	MDA-MB-231
	Neg	antimiR 9-5	antimiR 182	antimiR 449	antimiR 455	antimiR 519										Dunnett's multiple comparisons test	Mean Diff,	95,00% CI of diff,	Below threshold?	Summary	Adjusted P Value	A-?
	1	1.32959	0.735046	1.34167	0.99721	1.27874										Neg vs. antimiR 9-5	-0.02222	-0,4262 to 0,3818	No	ns	>0,9999	B	antimiR 9-5
	1	0.754734	0.397716	0.668455	1.28756	1.63267										Neg vs. antimiR 182	0.3441	-0,05991 to 0,7481	No	ns	0.1167	C	antimiR 182
	1	0.982346	0.834932	1.01022	1.12125	1.41236						ANOVA summary				Neg vs. antimiR 449	-0.006781	-0,4108 to 0,3972	No	ns	>0,9999	D	antimiR 449
	1				1.46474	1.64995						F	4.573			Neg vs. antimiR 455	-0.1367	-0,4496 to 0,1763	No	ns	0.6828	E	antimiR 455
	1				0.958564	0.921638						P value	0.0045			Neg vs. antimiR 519	-0.3246	-0,6375 to -0,01163	Yes	*	0.04	F	antimiR 519
	1				1.03488	1.18247						P value summary	**
	1				1.09258	1.19418						Significant diff. among means (P < 0.05)?	Yes			Test details	Mean 1	Mean 2	Mean Diff,	SE of diff,	n1	n2	q	DF
												R squared	0.4879			Neg vs. antimiR 9-5	1	1.022	-0.02222	0.148	7	3	0.1502	24
																Neg vs. antimiR 182	1	0.6559	0.3441	0.148	7	3	2.326	24
																Neg vs. antimiR 449	1	1.007	-0.006781	0.148	7	3	0.04583	24
																Neg vs. antimiR 455	1	1.137	-0.1367	0.1146	7	7	1.193	24
																Neg vs. antimiR 519	1	1.325	-0.3246	0.1146	7	7	2.832	24
C
	MCF7	neg	455	519								Repeated measures ANOVA summary
		1	0.600984	0.468025								Assume sphericity?	No			Dunnett's multiple comparisons test	Mean Diff,	95,00% CI of diff,	Below threshold?	Summary	Adjusted P Value	A-?
		1	0.811176	0.792964								F	17.26			neg vs. 455	0.2651	0,06430 to 0,4658	Yes	*	0.0163	B	455
		1	0.417412	0.354633								P value	0.0016			neg vs. 519	0.3443	0,1427 to 0,5458	Yes	**	0.0049	C	519
		1	0.806174	0.703192								P value summary	**
		1	0.671576	0.668579								Statistically significant (P < 0.05)?	Yes			Test details	Mean 1	Mean 2	Mean Diff,	SE of diff,	n1	n2	q	DF
		1	0.970601	0.705159								Geisser-Greenhouse's epsilon	0.7221			neg vs. 455	1	0.7349	0.2651	0.07013	7	7	3.78	6
		1	0.866588	0.897617								R squared	0.742			neg vs. 519	1	0.6557	0.3443	0.07039	7	7	4.891	6
	MDA-MB-231											Data sets analyzed	A-C			Dunnett's multiple comparisons test	Mean Diff,	95,00% CI of diff,	Below threshold?	Summary	Adjusted P Value	A-?
		Neg	miR-455	miR-519												Neg vs. miR-455	0.06411	-0,02306 to 0,1513	No	ns	0.1351	B	miR-455
		1	0.88378	0.812196								ANOVA summary				Neg vs. miR-519	0.2158	0,1286 to 0,3029	Yes	***	0.0007	C	miR-519
		1	0.966255	0.809355								F	26.49
		1	0.95764	0.731139								P value	0.0011			Test details	Mean 1	Mean 2	Mean Diff,	SE of diff,	n1	n2	q	DF
												P value summary	**			Neg vs. miR-455	1	0.9359	0.06411	0.03045	3	3	2.106	6
												Significant diff. among means (P < 0.05)?	Yes			Neg vs. miR-519	1	0.7842	0.2158	0.03045	3	3	7.087	6
												R squared	0.8983

## Sheet: Figure 4
B
	plPCX	pLPCX-GSNOR									Column B	pLPCX-GSNOR
	1.00622	0.721179									vs.	vs,
	0.979006	0.740066									Column A	plPCX
	1.01477	0.72791
	1.11028	0.7581									Unpaired t test
	1.04349	0.819271									P value	0.0001
	0.846235	0.643599									P value summary	***
											Significantly different (P < 0.05)?	Yes
											One- or two-tailed P value?	Two-tailed
											t, df	t=6,208, df=10
D
	siSCR	siSCR	siSCR		siGSNOR	siGSNOR	siGSNOR				ANOVA summary			Šídák's multiple comparisons test	Mean Diff,	95,00% CI of diff,	Below threshold?	Summary	Adjusted P Value
	antimIR-Neg	antimIR-445	antimIR-519		antimIR-Neg	antimIR-445	antimIR-519				F	6.179		antimIR-Neg vs. antimIR-445	0.1606	0,005972 to 0,3152	Yes	*	0.0395	A-B
	1.07499	0.884623	0.767649		0.939709	1.01892	0.852656				P value	0.0008		antimIR-Neg vs. antimIR-519	0.211	0,05633 to 0,3656	Yes	**	0.0048	A-C
	0.923443	0.80942	0.765807		1.01837	0.860139	1.01931				P value summary	***		antimIR-Neg vs. antimIR-445	-0.01722	-0,1718 to 0,1374	No	ns	0.997	E-F
	1.00156	0.898617	0.699449		1.04192	0.959208	0.989028				Significant diff. among means (P < 0.05)?	Yes		antimIR-Neg vs. antimIR-519	0.01464	-0,1400 to 0,1693	No	ns	0.9984	E-G
	1.0164	0.843677	0.870404		1.09499	1.03099	1.13035				R squared	0.5628
	1.01924	0.796345	0.877575		0.977687	1.28954	1.00814							Test details	Mean 1	Mean 2	Mean Diff,	SE of diff,	n1	n2	t	DF
														antimIR-Neg vs. antimIR-445	1.007	0.8465	0.1606	0.05744	5	5	2.796	24
														antimIR-Neg vs. antimIR-519	1.007	0.7962	0.211	0.05744	5	5	3.673	24
														antimIR-Neg vs. antimIR-445	1.015	1.032	-0.01722	0.05744	5	5	0.2998	24
														antimIR-Neg vs. antimIR-519	1.015	0.9999	0.01464	0.05744	5	5	0.2548	24
E
	pLPCX	pLPCX-GSNOR									Column B	pLPCX-GSNOR
	330	207									vs.	vs,
	310	242									Column A	pLPCX
	289	234
	315	213									Unpaired t test
											P value	0.0003
											P value summary	***
											Significantly different (P < 0.05)?	Yes
											One- or two-tailed P value?	Two-tailed
											t, df	t=7,318, df=6
F	Hours	plPCX			plPCX-GNOR
	1	0	0	0	0	0	0					plPCX	plPCX-GNOR
	8	12.4212	11.7971	15.1227	3.83926	9.27517	8.89654				Comparison of Fits				P value	Mean of plPCX	Mean of plPCX-GNOR	Difference	SE of difference	t ratio	df	q value
	16	21.1168	24.0371	22.2989	11.7738	16.1222	15.2543				Null hypothesis					0	0	0	0
	24	33.4048	38.3622	37.5457	21.4083	27.7921	28.5135				Alternative hypothesis				0.081928	13.11	7.337	5.777	1.764	3.275	2	0.082747
											P value				0.006771	22.48	14.38	8.101	0.67	12.09	2	0.010257
											Conclusion (alpha = 0.05)				0.006539	36.44	25.9	10.53	0.8559	12.31	2	0.010257
											Preferred model
											F (DFn, DFd)
											Different curve for at least one data set
											Best-fit values
											YIntercept	-0.845	-1.598
											Slope	1.539	1.102
											95% CI (profile likelihood)
											YIntercept	-3,072 to 1,382	-4,596 to 1,400
											Slope	1,390 to 1,688	0,9022 to 1,303

## Sheet: Figure 5
D
	SNO-GSK3b/GSK3b						Paired t test
	plpcx	plpcx GSNOR					P value	0.0403
	0.980901	0.109118					P value summary	*
	0.7243	0.302455					Significantly different (P < 0.05)?	Yes
	0.966197	0.1					One- or two-tailed P value?	Two-tailed
							t, df	t=4,830, df=2
							Number of pairs	3
	SNO-FAK/FAK1
	plpcx	plpcx GSNOR					Paired t test
	0.681757	0.053204					P value	0.0376
	0.472897	0.0804718					P value summary	*
	0.914188	0.1					Significantly different (P < 0.05)?	Yes
							One- or two-tailed P value?	Two-tailed
							t, df	t=5,012, df=2
							Number of pairs	3
E
	SNO-FAK/FAK1						ANOVA summary			Dunnett's multiple comparisons test	Mean Diff,	95,00% CI of diff,	Below threshold?	Summary	Adjusted P Value	A-?
	Neg	antimiR-455	antimir-519				F	8.821		Neg vs. 455	0.528	0,1574 to 0,8985	Yes	*	0.0116	B	455
	1	0.324128	0.753249				P value	0.0163		Neg vs. 519	0.376	0,005463 to 0,7466	Yes	*	0.0474	C	519
	1	0.434037	0.743523				P value summary	*
	1	0.65789	0.375205				Significant diff. among means (P < 0.05)?	Yes		Test details	Mean 1	Mean 2	Mean Diff,	SE of diff,	n1	n2	q	DF
							R squared	0.7462		Neg vs. 455	1	0.472	0.528	0.1294	3	3	4.08	6
										Neg vs. 519	1	0.624	0.376	0.1294	3	3	2.905	6
	SNO-GSK3b/GSK3b
	Neg	antimiR-455	antimir-519				ANOVA summary			Dunnett's multiple comparisons test	Mean Diff,	95,00% CI of diff,	Below threshold?	Summary	Adjusted P Value	A-?
	1	0.563182	0.562858				F	12.28		Neg vs. 455	0.4858	0,1458 to 0,8258	Yes	*	0.0114	B	455
	1	0.421731	0.198187				P value	0.0076		Neg vs. 519	0.5304	0,1905 to 0,8704	Yes	**	0.0076	C	519
	1	0.557698	0.647648				P value summary	**
							Significant diff. among means (P < 0.05)?	Yes		Test details	Mean 1	Mean 2	Mean Diff,	SE of diff,	n1	n2	q	DF
							R squared	0.8036		Neg vs. 455	1	0.5142	0.4858	0.1187	3	3	4.091	6
										Neg vs. 519	1	0.4696	0.5304	0.1187	3	3	4.467	6
F
	GSNOR/vinculin						Paired t test
	plpcx	plpcx GSNOR					P value	0.0372
	1	3.10375					P value summary	*
	1	3.14961					Significantly different (P < 0.05)?	Yes
	1	2.07111					One- or two-tailed P value?	Two-tailed
							t, df	t=5,041, df=2
							Number of pairs	3
	pGSK3B/GSK3b						Paired t test
	plpcx	plpcx GSNOR					P value	0.0043
	1	0.488536					P value summary	**
	1	0.530156					Significantly different (P < 0.05)?	Yes
	1	0.412869					One- or two-tailed P value?	Two-tailed
							t, df	t=15,23, df=2
							Number of pairs	3
G
	pGSK3B/GSK3b						ANOVA summary			Dunnett's multiple comparisons test	Mean Diff,	95,00% CI of diff,	Below threshold?	Summary	Adjusted P Value	A-?
	neg	anti455	anti519				F	16.59		neg vs. anti455	0.25	0,06226 to 0,4376	Yes	*	0.0157	B	anti455
	1	0.684328	0.50016				P value	0.0036		neg vs. anti519	0.3701	0,1824 to 0,5578	Yes	**	0.0024	C	anti519
	1	0.816839	0.64669				P value summary	**
	1	0.748969	0.742966				Significant diff. among means (P < 0.05)?	Yes		Test details	Mean 1	Mean 2	Mean Diff,	SE of diff,	n1	n2	q	DF
							R squared	0.8468		neg vs. anti455	1	0.75	0.25	0.06556	3	3	3.813	6
										neg vs. anti519	1	0.6299	0.3701	0.06556	3	3	5.645	6

## Sheet: Figure 6
A
	GSNOR	mock	+GSNOR						Paired t test
		1	3.37731						P value	0.0034
		1	2.38311						P value summary	**
		1	3.96981						Significantly different (P < 0.05)?	Yes
		1	2.23082						One- or two-tailed P value?	Two-tailed
		1	2.98923						t, df	t=6,209, df=4
									Number of pairs	5
	SNAI1	mock	+GSNOR						Paired t test
		1	0.703764						P value	0.039
		1	0.489405						P value summary	*
		1	0.841184						Significantly different (P < 0.05)?	Yes
		1	0.824633						One- or two-tailed P value?	Two-tailed
									t, df	t=3,517, df=3
									Number of pairs	4
	CDH1	mock	+GSNOR						Paired t test
		1	1.10684						P value	0.0123
		1	1.11355						P value summary	*
		1	1.62477						Significantly different (P < 0.05)?	Yes
		1	1.47005						One- or two-tailed P value?	Two-tailed
		1	1.74334						t, df	t=3,532, df=6
		1	1.17257						Number of pairs	7
		1	1.21229
B
	GSNOR	pLPCX	pLPCX-GSNOR						Paired t test
		1	43.921						P value	0.004
		1	35.749						P value summary	**
		1	42.41						Significantly different (P < 0.05)?	Yes
									One- or two-tailed P value?	Two-tailed
									t, df	t=15,81, df=2
									Number of pairs	3
	CDH1	pLPCX	pLPCX-GSNOR						Paired t test
		1	1.655						P value	0.0446
		1	1.082						P value summary	*
		1	1.373						Significantly different (P < 0.05)?	Yes
		1	1.544						One- or two-tailed P value?	Two-tailed
		1	1.066						t, df	t=2,889, df=4
									Number of pairs	5
D
SNAIL	PLPCX	PLPCX-GSNOR		CDH1	PLPCX	PLPCX-GSNOR			SNAIL
	64.8333	8.03283			2146.46	6466.41			Unpaired t test
	36.0474	30.1601			1808.45	4157.11			P value	0.0019
	14.6528	12.9028			1479.76	3900.61			P value summary	**
	35.1025	16.5327							Significantly different (P < 0.05)?	Yes
	20.0735	19.3362			3256.02	2781.91			One- or two-tailed P value?	Two-tailed
	12.3189				2524.76	4564.55			t, df	t=3,719, df=16
	43.2632	38.6889			3260.18	4687.74
	10.2563	35.8275							CDH1
		31.9466			3228	6826.67			Unpaired t test
	61.9424	20.7219			2744.94	3958.26			P value	0.0074
	63.1636	20.1181			2672.72	2924.2			P value summary	**
	54.7654	34.622							Significantly different (P < 0.05)?	Yes
	66.7064	28.0812							One- or two-tailed P value?	Two-tailed
	40.9034								t, df	t=2,728, df=117
	29.995	36.9351
	73.0234	25.2425
	20.349	24.176
	34.9623	36.1373
		21.3163
	52.4892	27.71
	30.665	15.4845
	45.9392	22.5446
	15.8838	21.1902
	7.90228
		17.891
	18.7945	27.0742
	21.9874	13.9102
	13.5551	23.3442
	14.2151	32.1921
		21.9505
	12.9264	20.8937
	16.8253	9.23113
	11.864
	32.9208	3.53913
	33.3017	20.8217
	19.0696	20.7861
	23.2372	27.6728
	29.6141	19.9991
	39.9777	10.4974
	31.4737	34.1827
	29.2981
	70.053	47.3345
		29.7487
	29.579	11.4101
	26.8329	15.8167
	16.8003	21.1993
	21.9964	9.21178
	15.4289	12.2007
	18.0002
	12.8838	44.2159
		36.6026
	31.4167	22.4844
	43.8066
	20.5584	34.0933
	44.513	23.052
	37.2949	28.1246
	30.6823	24.1552
	31.9759	24.7985
	42.9525	37.1225
	58.6861
	24.8796
	23.4866
	14.0649
	27.7619
	22.0074
	43.969
	25.3783
	24.4942
	41.8393
	18.238
	21.8301
	21.6974
	26.9956
E									Repeated measures ANOVA summary			Dunnett's multiple comparisons test	Mean Diff,	95,00% CI of diff,	Below threshold?	Summary	Adjusted P Value	A-?
	SNAII1	neg	anti455	anti519					Assume sphericity?	No		neg vs. anti455	0.1468	0,09639 to 0,1973	Yes	**	0.0025	B	anti455
		1	0.842101	0.64772					F	18.08		neg vs. anti519	0.3329	0,07686 to 0,5890	Yes	*	0.0249	C	anti519
		1	0.859752	0.856641					P value	0.0212
		1	0.885955	0.551719					P value summary	*		Test details	Mean 1	Mean 2	Mean Diff,	SE of diff,	n1	n2	q	DF
		1	0.824848	0.612127					Statistically significant (P < 0.05)?	Yes		neg vs. anti455	1	0.8532	0.1468	0.01305	4	4	11.25	3
									Geisser-Greenhouse's epsilon	0.5275		neg vs. anti519	1	0.6671	0.3329	0.06623	4	4	5.027	3
									R squared	0.8577
									Repeated measures ANOVA summary			Dunnett's multiple comparisons test	Mean Diff,	95,00% CI of diff,	Below threshold?	Summary	Adjusted P Value	A-?
	CDH1	neg	anti455	anti519					Assume sphericity?	No		neg vs. anti455	-0.334	-0,5618 to -0,1063	Yes	*	0.0142	B	anti455
		1	1.23151	1.18902					F	10.21		neg vs. anti519	-0.4016	-0,7983 to -0,004926	Yes	*	0.0481	C	anti519
		1	1.57845	1.52789					P value	0.0157
		1	1.39295	1.81641					P value summary	*		Test details	Mean 1	Mean 2	Mean Diff,	SE of diff,	n1	n2	q	DF
		1	1.21356	1.23312					Statistically significant (P < 0.05)?	Yes		neg vs. anti455	1	1.334	-0.334	0.06881	5	5	4.855	4
		1	1.2537	1.24164					Geisser-Greenhouse's epsilon	0.7202		neg vs. anti519	1	1.402	-0.4016	0.1198	5	5	3.352	4
									R squared	0.7186
	GSNOR	neg	anti455	anti519					Repeated measures ANOVA summary			Šídák's multiple comparisons test	Mean Diff,	95,00% CI of diff,	Below threshold?	Summary	Adjusted P Value
		1	1.24799	1.2091					Assume sphericity?	No		neg vs. anti455	-0.5194	-0,8291 to -0,2096	Yes	**	0.0065	A-B
		1	1.71653	1.94319					F	13.26		neg vs. anti519	-0.8471	-1,555 to -0,1388	Yes	*	0.0259	A-C
		1	1.38475	1.97436					P value	0.011
		1	1.28589	1.28418					P value summary	*		Test details	Mean 1	Mean 2	Mean Diff,	SE of diff,	n1	n2	t	DF
		1	1.68217	1.95638					Statistically significant (P < 0.05)?	Yes		neg vs. anti455	1	1.519	-0.5194	0.09828	6	6	5.285	5
		1	1.79884	2.71522					Geisser-Greenhouse's epsilon	0.5651		neg vs. anti519	1	1.847	-0.8471	0.2247	6	6	3.77	5
									R squared	0.7262
F
	GSNOR	antimirNEG	antimir445	antimir519					ANOVA summary			Dunnett's multiple comparisons test	Mean Diff,	95,00% CI of diff,	Below threshold?	Summary	Adjusted P Value	A-?
		1	0.91	0.962					F	1.01		antimirNEG vs. antimir445	-0.0052	-0,08258 to 0,07218	No	ns	0.9795	B
		1	0.939	1.009					P value	0.3931		antimirNEG vs. antimir519	0.0352	-0,04218 to 0,1126	No	ns	0.4398	C
		1	1.017	0.955					P value summary	ns
		1	1.106	0.95					Significant diff. among means (P < 0.05)?	No		Test details	Mean 1	Mean 2	Mean Diff,	SE of diff,	n1	n2
		1	1.054	0.948					R squared	0.1441		antimirNEG vs. antimir445	1	1.005	-0.0052	0.03092	5	5
												antimirNEG vs. antimir519	1	0.9648	0.0352	0.03092	5	5
	CDH1	antimirNEG	antimir445	antimir519					ANOVA summary			Šídák's multiple comparisons test	Mean Diff,	95,00% CI of diff,	Below threshold?	Summary	Adjusted P Value
		1	1.094	1.315					F	7.391		antimirNEG vs. antimir445	-0.1483	-0,3322 to 0,03571	No	ns	0.1151	A-B
		1	1.255	1.394					P value	0.0126		antimirNEG vs. antimir519	-0.2635	-0,4475 to -0,07954	Yes	**	0.008	A-C
		1	1.123	1.301					P value summary	*
		1	1.121	1.044					Significant diff. among means (P < 0.05)?	Yes		Test details	Mean 1	Mean 2	Mean Diff,	SE of diff,	n1	n2	t	DF
									R squared	0.6216		antimirNEG vs. antimir445	1	1.148	-0.1483	0.06871	4	4	2.158	9
												antimirNEG vs. antimir519	1	1.264	-0.2635	0.06871	4	4	3.835	9
H	siSCR	siSCR	siSCR	siGSNOR	siGSNOR	siGSNOR
SNAI1	antimiR-NEG	antimiR-455	antimiR-519	antimir-NEG	antimir-455	antimir-519			ANOVA summary
	25.9876	40.7515	12.4174	43.5248	24.6577	41.4661			F	5.398
	71.7671	16.5306	42.5336	27.3273	15.7694	35.3748			P value	<0,0001
	68.8889	24.244	32.7735	27.2955	35.0913	20.3794			P value summary	****
	42.1115		43.5747	46.6891	33.0843	33.7504			Significant diff. among means (P < 0.05)?	Yes
	29.1884	7.4982	24.714	24.5518		16.5032			R squared	0.05191
	35.7396	16.9762	34.552	28.1563		12.871
	32.2356	42.058	24.6505	54.4524	16.5119	9.22181
	31.4079	12.7441	32.9988	40.5491	19.5971	25.6452			Šídák's multiple comparisons test	Mean Diff,	95,00% CI of diff,	Below threshold?	Summary	Adjusted P Value
	27.9301	42.765	15.8772	16.74	25.4716	41.3585			antimiR-NEG vs. antimiR-455	5.799	0,2083 to 11,39	Yes	*	0.0372	A-B
	12.069	25.8943	0.912594	24.9105					antimiR-NEG vs. antimiR-519	6.292	1,161 to 11,42	Yes	**	0.0072	A-C
	49.2946		7.59878	26.3382					antimir-NEG vs. antimir-455	-1.334	-6,981 to 4,314	No	ns	0.9945	D-E
	68.5744	35.6496			56.1807	19.6545			antimir-NEG vs. antimir-519	-1.17	-6,681 to 4,342	No	ns	0.9972	D-F
	39.2803		22.0525		40.7904	23.0716			antimiR-455 vs. antimir-455	-6.567	-12,39 to -0,7454	Yes	*	0.0174	B-E
	38.2684	23.6052	30.2186	26.5961	36.5672	44.4207			antimiR-519 vs. antimir-519	-6.895	-12,13 to -1,658	Yes	**	0.003	C-F
	17.5053		40.5657	26.8166	23.6	15.871			antimiR-NEG vs. antimir-NEG	0.5663	-4,844 to 5,977	No	ns	>0,9999	A-D
		5.32105	22.3455	21.4206	48.7429	35.4391
		7.37182	25.6594	24.8745	20.739	14.2428			Test details	Mean 1	Mean 2	Mean Diff,	SE of diff,	n1	n2	t	DF
	34.2047	24.5358	16.5596	18.9272	19.946	25.8239			antimiR-NEG vs. antimiR-455	29.67	23.87	5.799	2.075	85	74	2.794	493
	37.0737	12.629	28.6689	24.1888	19.3198	27.7252			antimiR-NEG vs. antimiR-519	29.67	23.38	6.292	1.905	85	105	3.303	493
	21.8694	6.67604	13.5553			18.5808			antimir-NEG vs. antimir-455	29.11	30.44	-1.334	2.096	84	72	0.6361	493
	31.2656		18.2592	26.8011	16.3239				antimir-NEG vs. antimir-519	29.11	30.28	-1.17	2.046	84	79	0.5718	493
	25.2565	16.8372	47.4827	35.7915	19.8286				antimiR-455 vs. antimir-455	23.87	30.44	-6.567	2.161	74	72	3.039	493
	68.0924	18.1938		10.9711	46.7134	22.4138			antimiR-519 vs. antimir-519	23.38	30.28	-6.895	1.944	105	79	3.547	493
	44.7576	19.659	36.0052	47.8638		18.2624			antimiR-NEG vs. antimir-NEG	29.67	29.11	0.5663	2.008	85	84	0.282	493
	41.5749	14.201	34.628	15.3937	45.7124	40.6987
		10.9259	31.1214	32.06	57.3007	40.1077
	42.3479	17.4784	22.8111	37.4667	42.9613	27.4593
	38.2524	28.6401	25.023	24.0018	17.5524	20.8808
	46.1769	10.8702	20.2863	22.8097	52.3419	20.9961
	14.2658		25.0591		28.419	33.324
	18.1623	21.6864	33.969	25.8541	4.54545	38.1628
	3.94208	26.9209	27.3429	29.8275	51.2052	36.0377
	9.62592	16.8446	24.396	31.5612	60.0384	0.0806777
	4.75897	15.3492		40.6437		16.0273
	12.2386	41.2172	6.30581	30.7788
	15.7835	16.3257	36.9906	14.9578	31.9197
			25.6299	39.7573	30.9241	39.4714
	22.7108	22.2696	25.8941		60.8246	17.0745
	45.4678	28.644	19.3287	0.352931	50.1285	19.8981
	3.89422	22.7861	19.3071	30.4534	37.0273	27.4118
	29.0594	22.2559	20.83	41.1165	24.2906	22.3995
	30.2592	12.6708	1.69899	32.1301	31.1012	41.4585
	50.9586	24.4543	26.1732	38.7914	9.52139	17.4151
	0.775194	17.5662		21.015	42.2362
	22.8138	6.19726	8.69424		13.6308
	22.4204	34.8389	3.45919		17.3685	22.4344
	17.1277	21.0798	32.2648	20.3873	12.1043	31.363
	29.6341		18.6807	35.1518		26.2609
	26.1408	21.0875	16.6748	36.0619		33.6345
		27.64	17.0432	19.7431	7.33333	29.0292
	41.0684	18.8243	8.15347	36.5507	25.7474	38.5672
	23.4792	15.8281	14.7425	36.7297	27.3555	1.58141
	16.4356	14.7401		23.4693	16.0789	28.6338
	37.1746	26.2647	31.6191	26.7585	20.8064	30.6612
	10.426	25.1954	21.8457		17.4977	32.5828
	57.9579	19.4943	14.9555		36.4678	28.7804
	35.2416		14.6185	30.2404	18.4871
	20.732	36.1103	10.6873	17.8296		20.7713
	26.942	48.4724	16.8692	21.1142		27.2192
		47.4798		29.1887	30.3974	23.3806
		39.3044	50.8591	33.3068	21.9877	26.6403
	37.9665	19.3952	43.0744	25.5857	18.9596
	35.8558		35.7107	35.7815	23.0635
	38.3583	5.33945	37.8367	36.0578	38.9595	31.3943
	28.573	29.1614	20.6837	16.9747	23.5138	39.8004
	15.6205	32.6037	43.4648	6.16919	27.3502	7
		26.9272	10.7773	41.542	43.521	26.6223
	18.4577		25.5723			30.2549
	6.97491	13.3642		45.8052	21.7877	20.1464
	13.6116	31.8401	25.2232	19.2059	8.46395	19.666
	12.0286	17.7736	21.5717	22.1037	34.2848
	33.5742	37.6032	30.6922	21.2262	10.8939	1.57967
	39.8869	24.3377	16.55	20.9957	29.5522	68.4483
	35.8339	32.7981	17.7964	36.1099	25.3372	55.2823
	21.0284	46.1096		9.23571	24.3044	61.3474
		43.1917	34.2031	25.6882	25.1678	21.9154
	18.3862	14.7673	16.2056	48.7903		24.3836
	13.8527	47.098	20.4872	40.2948		60.2584
	14.3939	26.0571	22.3454	51.7975	26.0786	30.7837
	14.0036		34.6512		61.1251	66.4023
	12.0958	17.6682	17.8658	33.1797	52.9196	48.8665
	28.2504	28.6203	19.3893	21.8625	47.6639	62.4568
	14.6049	22.3333	24.1929	34.6066	44.6504	56.2531
		26.1998	8.57087	31.3581	38.2348
	48.4675	20.1152	25.51	37.0664	50.8066	62.0989
	31.5607	29.6317	13.9391	17.1601	35.1965	38.1558
	37.3863		20.3216	20.548	17.5052	46.8508
	29.847			18.1455		13.0591
	28.8343		20.0521	29.362		54.8282
	43.3482		25.0489	42.6581		23.0336
	29.2632		21.2781			42.0049
	33.8213		8.77476	33.7567		16.3156
	48.0585		8.49624	22.3357
	14.5667		13.0426	46.3244
	52.9507		28.8058	9.5587
				43.2613
			16.0766
			27.233
			26.3187
			64.3992
			20.1594
			11.9404
			27.1216
			25
			18.0616
			14.8051
			10.4309
			32.1441
			36.5277
			37.0459
			33.402
			10.2159
			30.907
			9.31136
			9.72574
CDH1	antimiR-NEG	antimiR-455	antimiR-519	antimir-NEG	antimir-455	antimir-519			ANOVA summary
	1308.12	1826.16	2464.92	2401.36	2496.92	2059.81			F	6.172
	1713.77	2120.82	2485.89	2557.5	2210.59	2048.08			P value	0.0002
	1828.11	2782.19		2210.73	2317.61	1800.77			P value summary	***
				2323.54					Significant diff. among means (P < 0.05)?	Yes
	2150.8	2306.86	2218.89		1490.96	2729.69			R squared	0.3913
	1109.67	2207.65	3105.89	2356.6	2119.9	1906.16
	1336.35	2646.01	3213.17	2473.67	2871.4	2551.14			Šídák's multiple comparisons test	Mean Diff,	95,00% CI of diff,	Below threshold?	Summary	Adjusted P Value
				1992.79					antimiR-NEG vs. antimiR-455	-620.2	-1148 to -92,32	Yes	*	0.013	A-B
	1368.67	2219.85	2356.93		2680.79	1911.89			antimiR-NEG vs. antimiR-519	-973.5	-1518 to -429,4	Yes	****	<0,0001	A-C
	2038.82	1906.44	3466.35	2196.97	3200.83	2042.66			antimir-NEG vs. antimir-455	-211.2	-725,6 to 303,3	No	ns	0.8736	D-E
	1905.53	2325.32	1595.98	2108.97	2877.16	2259.17			antimir-NEG vs. antimir-519	117.4	-397,1 to 631,9	No	ns	0.9946	D-F
				2006.52					antimiR-455 vs. antimir-455	-213.9	-741,7 to 314,0	No	ns	0.8806	B-E
									antimiR-519 vs. antimir-519	468	-76,08 to 1012	No	ns	0.1308	C-F
									antimiR-NEG vs. antimir-NEG	-622.9	-1137 to -108,4	Yes	**	0.0097	A-D
									Test details	Mean 1	Mean 2	Mean Diff,	SE of diff,	n1	n2	t	DF
									antimiR-NEG vs. antimiR-455	1640	2260	-620.2	188.4	9	9	3.292	48
									antimiR-NEG vs. antimiR-519	1640	2614	-973.5	194.2	9	8	5.014	48
									antimir-NEG vs. antimir-455	2263	2474	-211.2	183.6	10	9	1.15	48
									antimir-NEG vs. antimir-519	2263	2145	117.4	183.6	10	9	0.6393	48
									antimiR-455 vs. antimir-455	2260	2474	-213.9	188.4	9	9	1.135	48
									antimiR-519 vs. antimir-519	2614	2145	468	194.2	8	9	2.41	48
									antimiR-NEG vs. antimir-NEG	1640	2263	-622.9	183.6	9	10	3.392	48

## Sheet: Figure 7
A
MCF7	np-betaCAT	mock	+GSNOR						Paired t test
		1	0.354154						P value	0.0192
		1	0.682666						P value summary	*
		1	0.871959						Significantly different (P < 0.05)?	Yes
		1	0.843412						One- or two-tailed P value?	Two-tailed
		1	0.702418						t, df	t=3,400, df=5
		1	0.880841						Number of pairs	6
MDA-MB-231	np-betaCAT	mock	+GSNOR						Paired t test
		1	1.02002						P value	0.1731
		1	0.772173						P value summary	ns
		1	0.918761						Significantly different (P < 0.05)?	No
		1	0.949293						One- or two-tailed P value?	Two-tailed
		1	1.0544						t, df	t=1,588, df=5
		1	0.896517						Number of pairs	6
B
MCF7	np-betaCAT	neg	anti455	anti519					ANOVA summary			Dunnett's multiple comparisons test	Mean Diff,	95,00% CI of diff,	Below threshold?	Summary	Adjusted P Value	A-?
		1	0.913708	0.741086					F	4.37		neg vs. anti455	0.09505	-0,04912 to 0,2392	No	ns	0.1804	B	anti455
		1	0.883593	0.949703					P value	0.0674		neg vs. anti519	0.1468	0,002583 to 0,2909	Yes	*	0.0468	C	anti519
		1	0.917545	0.868943					P value summary	ns
									Significant diff. among means (P < 0.05)?	No		Test details	Mean 1	Mean 2	Mean Diff,	SE of diff,	n1	n2	q	DF
									R squared	0.593		neg vs. anti455	1	0.9049	0.09505	0.05036	3	3	1.888	6
												neg vs. anti519	1	0.8532	0.1468	0.05036	3	3	2.914	6
MDA-MB-231	np-betaCAT	Neg	a-455	a-519					ANOVA summary			Šídák's multiple comparisons test	Mean Diff,	95,00% CI of diff,	Below threshold?	Summary	Adjusted P Value	A-?
		1	0.970783	0.85647					F	6.283		Neg vs. a-455	0.01993	-0,2518 to 0,2917	No	ns	0.9789	B	a-455
		1	1.00385	0.762237					P value	0.0136		Neg vs. a-519	0.3363	0,06452 to 0,6080	Yes	*	0.0164	C	a-519
		1	0.653803	0.310761					P value summary	*
		1	1.09535	0.755858					Significant diff. among means (P < 0.05)?	Yes		Test details	Mean 1	Mean 2	Mean Diff,	SE of diff,	n1	n2	t	DF
		1	1.17655	0.633389					R squared	0.5115		Neg vs. a-455	1	0.9801	0.01993	0.1064	5	5	0.1873	12
												Neg vs. a-519	1	0.6637	0.3363	0.1064	5	5	3.159	12
C
	siSCR NEG	siSCR antimiR-455	siSCR antimiR-518	siGSNOR NEG	siGSNOR antimiR-455	siGSNOR antimiR-518			ANOVA summary			Šídák's multiple comparisons test	Mean Diff,	95,00% CI of diff,	Below threshold?	Summary	Adjusted P Value
	701348	971921	236199	583956	2437847	667670			F	7.761		siSCR NEG vs. siSCR antimiR-455	907769	380052 to 1435487	Yes	****	<0,0001	A-B
	4426079	738183	284414	3699444	5073952	360857			P value	<0,0001		siSCR NEG vs. siSCR antimiR-518	661578	139781 to 1183375	Yes	**	0.0057	A-C
	681760	773669	242268	692114	6485506	194369			P value summary	****		siGSNOR NEG vs. siGSNOR antimiR-455	509555	-101848 to 1120958	No	ns	0.1509	D-E
	2676358	2363730	244046	793919	2572881	432267			Significant diff. among means (P < 0.05)?	Yes		siGSNOR NEG vs. siGSNOR antimiR-518	-185235	-750305 to 379835	No	ns	0.9216	D-F
	975387	1146924	480789	882591		371993			R squared	0.04073		siSCR NEG vs. siGSNOR NEG	181570	-419595 to 782736	No	ns	0.9435	A-D
	1368177	1946983	814694	655447	196049	8488545
	562499	1494976	3058600	410956	189911	467222						Test details	Mean 1	Mean 2	Mean Diff,	SE of diff,	n1	n2	t	DF
	3175841	920241	1059273	1927710	1005037	468131						siSCR NEG vs. siSCR antimiR-455	2218116	1310346	907769	205010	129	189	4.428	914
	1461454	443853	758416	1249373	458529	4529718						siSCR NEG vs. siSCR antimiR-518	2218116	1556538	661578	202710	129	200	3.264	914
	5565794	581305	1471991	2694051	524109	454764						siGSNOR NEG vs. siGSNOR antimiR-455	2036545	1526991	509555	237520	109	120	2.145	914
	1418530	2406881	1275648	624959	866834	183994						siGSNOR NEG vs. siGSNOR antimiR-518	2036545	2221780	-185235	219520	109	173	0.8438	914
	3698872	2077862	738160	1259423	1852027	823544						siSCR NEG vs. siGSNOR NEG	2218116	2036545	181570	233543	129	109	0.7775	914
	1897455	471595	2322584	327255	620110	594875
	4257115	826541	636790	1476285	1330523	396958
	6467049	966331	2740232	2271747	2246473	1722217
	1035019	580194	915108	1077929	1533216	3138227
	1128459	766770	2988365	1247719	1575491	579175
	2038185	1153034	1055254	989896	1199332	673120
	1881055	1264820	2412780	1908034		964772
	794181	365518	5936766	1148240	208090	983347
	426063	1398324	5881740	690019	185350	668602
	1848336	1089294	1310181	1227787	647626	808397
	4114520	1188262	2794268	817281	118905	1565139
	1517652	1214771		2420954	960241	821934
	3022057	1917449	1421785	684293	1149914	3366150
	1457724	1379286	682262	3408537	651484	786961
	4615991	802268	1510967	2685814	522988	344063
	2569134	1705100	522717	1520244	764301	791970
	1136929	2256172	162152	1391538	885249	1803063
	12448824		265800	4297396	1302011	1421896
		125687	6647809	705811	1839429	12091613
	1079674	262472	7261568	1621647	1167542	1017281
	4043011	1232344	1213280	15085555	1285503
	2229147	315370	1416791	3825833	723262	145905
	774099	278125	1051810		858503	704188
	836413	251695	2574136	100106	3762965	1108613
	1421469	2617148	906094	1563165	2412995	1298416
	1712611	1070187	645051	184610	3355670	1289548
	851711	2598199	1183486	1034112	1065233	1610769
	6200529	1870632	695793	4686459	1156258	2739371
	1561654	1721628	1077332	4729387	2684178	1810359
	327005	4005077	1617040	976083	1468600	2280418
	2717954	2695511	2005768	386926		4438373
	2874107	1270718	1610340	918414	262986	1909425
	1966327	181543	1964689	859890	1097468	3923767
	3410875	778887	2454454	5266923	478961
	1178595	637481	9463261	1711109	244330	998996
	1759604	1497908		673516	120075	531445
	1172143	948119	386603	4175121	522163	878544
	5787396	1024814	306550	1435372	1238724	271837
	1055894	475928	245065	1318961	1005962	906968
	3180123	572017	457274	1719588	1311906	2525464
	4277464	515861	2585267	2788532	2096644	2070244
	2137855	396940	239841	2221118	3215861	2267568
	1009472	1414616	5405989	828141	749835	708830
	2929201	946723	5014167	254423	1129272	1595905
	2480327	1008301	1667140	1958210	834586	1343086
	2450083	334905	3916747	1491265	2723072	1298021
	4673437	1187599	338108	2027123	745033	17638093
	1524379	581335	225816	5441489	1120292	3946875
	12930587	3004153	3308065		4389044	2029399
			298251	194013	1584881	3893571
	1366723	104507	225020	317140	1993921	1374792
	1289519	685091	350874	842749	1227084	5377590
	655572	1248667	1853787	994504	1266580	2874317
	10686970	4327251	480887	500347	1389815	1931624
	527359	2890597	732684	941545	2812255	1431895
	1190917	356301	600575	576579	1440372	1179845
	7094754	513649	413066	995210		3692946
	4160489	935256	370293	1374943	470311	1621102
	1515399	2105029	1004135	722155	1824305	1977011
		989430	952945	1441609	971320
	963801	2079419	607258	1787007	3864763	158169
	102532	471599	463118	4052619	2820618	1859771
	334768	4362404	439159	1643035	1461815	464953
	5756347	1883756	2169834	1642980	2580160	2302738
	761240	3276163	989206		3191970	2020361
	1081515	3186851	540481	240825	3681522	3807166
	536337	1053557	802056	377730	2636655	845551
	2058561	2210272	5068189	1297613		1064992
	537375	2649676	1174417	828313	209194	1744372
	1628868	1574625	5505788	1075578	1726002
	974695	3079933	583290	1918585	625699	688414
	791063		3057888		346925	149719
	1035320	549690	5117570	505072	795528	292663
	2004933	958953		961451	234287	176114
	2629847	488019	104408	2446703	320192	709687
	668238	137037	136434	3224758	1287776	732225
	575920	1273981	1125212	3248584	1087491	209715
	2342563	423843	2149363	2439054	1314734	341774
	332688	367236	751216	1383868	1060453	2869820
	1161009	606644	1578467	3150153	1992150	690473
	1878622	1033519	797381	2427872	1026189	3680097
	1032453	383778	1258696	3892999	2314914	1450981
	754988	542714	1168839	2147198	275332	424504
	1902513	226333	1415984	3192349	3264579	1997213
	3811490	481105	4194867	3099671	3873410	1756637
		359864	1423311	2162283	1120716	894687
	718644	289435	493637	1630598	3679330	2531570
	541999	559046	452143	4191434	1175028	2016499
	3689997	1581913	2333948	1839131	3341889	1109330
	499711	353615	3134682	1122616	1002627	2183265
	2408863	1012592	1232629	2605049	2266992	15895242
	541457	537684	1367824	2517770	1285802
	2062853	3138793	700443	3369308	3030142	2442614
	1200785	942237	2351677	2885703	6877858	416269
	507803	491817	1312005	3861012	1206221	1487404
	821050	579818	979926	4095632	3069760	827233
	373931	758076		4424963		861699
	1194136	580098	221583	6435334	289818	2382187
	1411879	790615	178515	3771055	934776	516559
	1443690	2571197	133023	3083098	169220	686886
	967438	672099	434956	3049855	518055	4715623
	1238103	351150	846386		283928	1056683
	1094296	902286	1169534		402535	451646
	2281550	273717	1588947		1536547	430936
	1451161	2102381	684370		949434	7334946
	2630250	923665	400481		212650	1298673
	631093	3683608	1221123		719818	2061900
	2001896	1085134	987066		1983163	1495174
	1584194	4919516	1116028		661347	1924857
	2642265	796386	1039662		1048977	795211
	903461	2193111	2216094		1149935	4290385
	930564	6200970	831333		1554448	4305212
	5786899		433528		773620	1946161
	1575975	521665	1613261		2390722	5864085
	3121714	1192344	648923			660302
	2092427	679201	525499			1037550
	1737567	1922007	750784			712525
	1831169	306015	1029146			10108262
	3555314	1224239	1020197			990291
	4135634	2065084	1942449
	2460767	3873349	1120252			1744755
		522802	1552468			1874611
		1409597	1315032			1648707
		544459	1142369			2104053
		1064274	1282115			2104988
		814298				1077767
		805274				792746
		1095578				3325599
		1610262				4750475
		1087358	3948785			1269605
		1903868	126229			5794155
		1296559	1670858			2153421
		1328034	320168			824804
		630637	491294			1970880
		5577968	1912439			1473413
		1597855	1552306			1346171
		862857	9803954			1849426
		1452135	814891			722536
		511750	1820687			3458615
		1528335	1017893			6281974
		735526	3101829			5285430
		754789	479167			4024061
		547961	1708626
		1043706	2942638			262944
		995966	2536798			1072146
		2586673	3041934			2177914
		4685957	1089889			2789664
			616601			2092685
		783127	2198958			993002
		548269	461519			1244238
		319787	584105			3996017
		386250	3424882			3062226
		1703247	1136293			325135
		747905	1290886			1875574
		298417	1694849			2717457
		714961	3322781			1884229
		1473015	3046656			9891334
		5808055	946200			4801233
		457610	2313689			928006
		3633145	1188684			2729279
		1030968	545767			1577704
		585227				1406240
		625863	120767			5103347
		2020833	41577			2445399
		1367241	145077			4293217
		1417016	507142			4003805
		561154	143584			6837632
		316617	1924366			4201471
		367301	1562537
		1120597	418653
		1956446	201668
		2202696	3324674
		412614	2673014
		802878	1057838
		1058395	3028458
		1105311	813499
		688593	585741
		778148	200199
		3515051	189793
		822943	2989963
		1197678	229749
		907837	989100
			1579496
			508655
			303815
			1309184
			1790722
			932024
			638612
			2230968
			1484068
			371268
			725827
			3395493
			2351632
			745768
			6821799

## Sheet: Figure S1
E
	MCF10A	HCC38	MCF7	MDA-MB-231	T47D	ZN751			ANOVA summary			Dunnett's multiple comparisons test	Mean Diff,	95,00% CI of diff,	Below threshold?	Summary		A-?
	1	0.718	0.531	0.558	0.592	0.254			F	11.25		MCF10A vs. HCC38	0.5213	0,1671 to 0,8754	Yes	**		B	HCC38
	1	0.501	0.29	0.188	0.174	0.101			P value	<0,0001		MCF10A vs. MCF7	0.7128	0,3586 to 1,067	Yes	***		C	MCF7
	1	0.07	0.077	0.11	0.22	0.081			P value summary	****		MCF10A vs. MDA-MB-231	0.7293	0,3751 to 1,083	Yes	****		D	MDA-MB-231
	1	0.626	0.251	0.227	0.356	0.144			Significant diff. among means (P < 0.05)?	Yes		MCF10A vs. T47D	0.6645	0,3103 to 1,019	Yes	***		E	T47D
									R squared	0.7576		MCF10A vs. ZN751	0.855	0,5008 to 1,209	Yes	****		F	ZN751
												Test details	Mean 1	Mean 2	Mean Diff,	SE of diff,	n1	n2	q	DF
												MCF10A vs. HCC38	1	0.4788	0.5213	0.1282	4	4	4.064	18
												MCF10A vs. MCF7	1	0.2873	0.7128	0.1282	4	4	5.558	18
												MCF10A vs. MDA-MB-231	1	0.2708	0.7293	0.1282	4	4	5.686	18
												MCF10A vs. T47D	1	0.3355	0.6645	0.1282	4	4	5.181	18
												MCF10A vs. ZN751	1	0.145	0.855	0.1282	4	4	6.667	18
F	MFC10A	HCC38	MCF7	MDA-MB-231	T47D	ZN751			ANOVA summary			Dunnett's multiple comparisons test	Mean Diff,	95,00% CI of diff,	Below threshold?	Summary	Adjusted P Value	A-?
	76.8798	20.853	14.7867	12.1082	13.4055	12.8693			F	1324		MFC10A vs. HCC38	54.89	52,09 to 57,69	Yes	****	<0,0001	B	HCC38
	72.3574	19.9867	14.7124	13.319	12.0649	10.7244			P value	<0,0001		MFC10A vs. MCF7	59.81	57,01 to 62,61	Yes	****	<0,0001	C	MCF7
	75.2628	18.9865	15.5652	12.9765	12.5813	12.1002			P value summary	****		MFC10A vs. MDA-MB-231	62.03	59,23 to 64,83	Yes	****	<0,0001	D	MDA-MB-231
									Significant diff. among means (P < 0.05)?	Yes		MFC10A vs. T47D	62.15	59,35 to 64,95	Yes	****	<0,0001	E	T47D
									R squared	0.9982		MFC10A vs. ZN751	62.94	60,14 to 65,73	Yes	****	<0,0001	F	ZN751
												Test details	Mean 1	Mean 2	Mean Diff,	SE of diff,	n1	n2	q	DF
												MFC10A vs. HCC38	74.83	19.94	54.89	0.9646	3	3	56.9	12
												MFC10A vs. MCF7	74.83	15.02	59.81	0.9646	3	3	62.01	12
												MFC10A vs. MDA-MB-231	74.83	12.8	62.03	0.9646	3	3	64.31	12
												MFC10A vs. T47D	74.83	12.68	62.15	0.9646	3	3	64.43	12
												MFC10A vs. ZN751	74.83	11.9	62.94	0.9646	3	3	65.24	12

## Sheet: Figure S2
A	Sample Id	Cancer Type Detailed	ADH5: Promoter methylation (RRBS)
	MB-0308	Breast	0					ANOVA summary			Dunnett's multiple comparisons test	Mean Diff,	95,00% CI of diff,	Below threshold?	Summary	Adjusted P Value	A-?
	MB-0620	Breast	0.016026					F	0.3256		Normal vs. Invasive Ductal Carcinoma	0.003308	-0,009035 to 0,01565	No	ns	0.7994	B	Invasive Ductal Carcinoma
	MB-0659	Breast	0.009524					P value	0.8609		Normal vs. Invasive Lobular Carcinoma	0.004396	-0,008488 to 0,01728	No	ns	0.6818	C	Invasive Lobular Carcinoma
	MB-6047	Breast	0.030769					P value summary	ns		Normal vs. Column D	0.0006749	-0,01547 to 0,01682	No	ns	0.9994	D	Column D
	MB-6212	Breast	0.043478					Significant diff. among means (P < 0.05)?	No		Normal vs. Column E	0.004022	-0,008650 to 0,01669	No	ns	0.7206	E	Column E
	MB-6284	Breast	0					R squared	0.001228
	MB-7000	Breast	0								Test details	Mean 1	Mean 2	Mean Diff,	SE of diff,	n1	n2	q	DF
	MB-7030	Breast	0								Normal vs. Invasive Ductal Carcinoma	0.01247	0.009167	0.003308	0.005468	8	840	0.6049	1059
	MB-0046	Breast Invasive Ductal Carcinoma	0								Normal vs. Invasive Lobular Carcinoma	0.01247	0.008079	0.004396	0.005708	8	80	0.7701	1059
	MB-0054	Breast Invasive Ductal Carcinoma	0								Normal vs. Column D	0.01247	0.0118	0.0006749	0.007153	8	11	0.09435	1059
	MB-0062	Breast Invasive Ductal Carcinoma	0								Normal vs. Column E	0.01247	0.008453	0.004022	0.005614	8	125	0.7165	1059
	MB-0064	Breast Invasive Ductal Carcinoma	0
	MB-0068	Breast Invasive Ductal Carcinoma	0.005236
	MB-0113	Breast Invasive Ductal Carcinoma	0
	MB-0123	Breast Invasive Ductal Carcinoma	0.019231
	MB-0126	Breast Invasive Ductal Carcinoma	0
	MB-0127	Breast Invasive Ductal Carcinoma	0
	MB-0128	Breast Invasive Ductal Carcinoma	0
	MB-0129	Breast Invasive Ductal Carcinoma	0
	MB-0131	Breast Invasive Ductal Carcinoma	0
	MB-0134	Breast Invasive Ductal Carcinoma	0
	MB-0138	Breast Invasive Ductal Carcinoma	0.011111
	MB-0143	Breast Invasive Ductal Carcinoma	0.005682
	MB-0148	Breast Invasive Ductal Carcinoma	0.058824
	MB-0149	Breast Invasive Ductal Carcinoma	0
	MB-0150	Breast Invasive Ductal Carcinoma	0.019531
	MB-0152	Breast Invasive Ductal Carcinoma	0.02
	MB-0155	Breast Invasive Ductal Carcinoma	0.003623
	MB-0157	Breast Invasive Ductal Carcinoma	0
	MB-0163	Breast Invasive Ductal Carcinoma	0
	MB-0164	Breast Invasive Ductal Carcinoma	0
	MB-0165	Breast Invasive Ductal Carcinoma	0
	MB-0166	Breast Invasive Ductal Carcinoma	0
	MB-0168	Breast Invasive Ductal Carcinoma	0.008163
	MB-0172	Breast Invasive Ductal Carcinoma	0
	MB-0173	Breast Invasive Ductal Carcinoma	0.060606
	MB-0174	Breast Invasive Ductal Carcinoma	0.009217
	MB-0175	Breast Invasive Ductal Carcinoma	0
	MB-0179	Breast Invasive Ductal Carcinoma	0
	MB-0181	Breast Invasive Ductal Carcinoma	0
	MB-0189	Breast Invasive Ductal Carcinoma	0
	MB-0193	Breast Invasive Ductal Carcinoma	0
	MB-0194	Breast Invasive Ductal Carcinoma	0.014706
	MB-0197	Breast Invasive Ductal Carcinoma	0
	MB-0198	Breast Invasive Ductal Carcinoma	0
	MB-0201	Breast Invasive Ductal Carcinoma	0
	MB-0202	Breast Invasive Ductal Carcinoma	0
	MB-0203	Breast Invasive Ductal Carcinoma	0.042254
	MB-0204	Breast Invasive Ductal Carcinoma	0
	MB-0206	Breast Invasive Ductal Carcinoma	0
	MB-0214	Breast Invasive Ductal Carcinoma	0
	MB-0218	Breast Invasive Ductal Carcinoma	0
	MB-0221	Breast Invasive Ductal Carcinoma	0.013333
	MB-0223	Breast Invasive Ductal Carcinoma	0
	MB-0224	Breast Invasive Ductal Carcinoma	0.012987
	MB-0226	Breast Invasive Ductal Carcinoma	0
	MB-0227	Breast Invasive Ductal Carcinoma	0
	MB-0235	Breast Invasive Ductal Carcinoma	0.009009
	MB-0236	Breast Invasive Ductal Carcinoma	0
	MB-0242	Breast Invasive Ductal Carcinoma	0
	MB-0243	Breast Invasive Ductal Carcinoma	0.027027
	MB-0244	Breast Invasive Ductal Carcinoma	0
	MB-0248	Breast Invasive Ductal Carcinoma	0
	MB-0249	Breast Invasive Ductal Carcinoma	0.015306
	MB-0253	Breast Invasive Ductal Carcinoma	0
	MB-0256	Breast Invasive Ductal Carcinoma	0.015873
	MB-0257	Breast Invasive Ductal Carcinoma	0.032258
	MB-0260	Breast Invasive Ductal Carcinoma	0
	MB-0261	Breast Invasive Ductal Carcinoma	0
	MB-0262	Breast Invasive Ductal Carcinoma	0.018018
	MB-0264	Breast Invasive Ductal Carcinoma	0
	MB-0265	Breast Invasive Ductal Carcinoma	0.022727
	MB-0268	Breast Invasive Ductal Carcinoma	0
	MB-0272	Breast Invasive Ductal Carcinoma	0.020408
	MB-0273	Breast Invasive Ductal Carcinoma	0.027027
	MB-0284	Breast Invasive Ductal Carcinoma	0.034188
	MB-0286	Breast Invasive Ductal Carcinoma	0
	MB-0287	Breast Invasive Ductal Carcinoma	0
	MB-0291	Breast Invasive Ductal Carcinoma	0
	MB-0294	Breast Invasive Ductal Carcinoma	0
	MB-0295	Breast Invasive Ductal Carcinoma	0
	MB-0301	Breast Invasive Ductal Carcinoma	0.022222
	MB-0303	Breast Invasive Ductal Carcinoma	0
	MB-0304	Breast Invasive Ductal Carcinoma	0
	MB-0305	Breast Invasive Ductal Carcinoma	0
	MB-0306	Breast Invasive Ductal Carcinoma	0
	MB-0307	Breast Invasive Ductal Carcinoma	0
	MB-0309	Breast Invasive Ductal Carcinoma	0.010753
	MB-0310	Breast Invasive Ductal Carcinoma	0
	MB-0313	Breast Invasive Ductal Carcinoma	0.034188
	MB-0314	Breast Invasive Ductal Carcinoma	0
	MB-0315	Breast Invasive Ductal Carcinoma	0
	MB-0317	Breast Invasive Ductal Carcinoma	0.007407
	MB-0321	Breast Invasive Ductal Carcinoma	0
	MB-0324	Breast Invasive Ductal Carcinoma	0.047059
	MB-0325	Breast Invasive Ductal Carcinoma	0
	MB-0336	Breast Invasive Ductal Carcinoma	0
	MB-0340	Breast Invasive Ductal Carcinoma	0
	MB-0343	Breast Invasive Ductal Carcinoma	0
	MB-0349	Breast Invasive Ductal Carcinoma	0
	MB-0350	Breast Invasive Ductal Carcinoma	0
	MB-0353	Breast Invasive Ductal Carcinoma	0
	MB-0356	Breast Invasive Ductal Carcinoma	0
	MB-0358	Breast Invasive Ductal Carcinoma	0
	MB-0359	Breast Invasive Ductal Carcinoma	0
	MB-0362	Breast Invasive Ductal Carcinoma	0
	MB-0368	Breast Invasive Ductal Carcinoma	0.033333
	MB-0370	Breast Invasive Ductal Carcinoma	0
	MB-0371	Breast Invasive Ductal Carcinoma	0.006667
	MB-0373	Breast Invasive Ductal Carcinoma	0.03125
	MB-0374	Breast Invasive Ductal Carcinoma	0
	MB-0375	Breast Invasive Ductal Carcinoma	0
	MB-0380	Breast Invasive Ductal Carcinoma	0
	MB-0381	Breast Invasive Ductal Carcinoma	0
	MB-0383	Breast Invasive Ductal Carcinoma	0
	MB-0386	Breast Invasive Ductal Carcinoma	0.046875
	MB-0388	Breast Invasive Ductal Carcinoma	0
	MB-0389	Breast Invasive Ductal Carcinoma	0
	MB-0391	Breast Invasive Ductal Carcinoma	0
	MB-0392	Breast Invasive Ductal Carcinoma	0.02381
	MB-0395	Breast Invasive Ductal Carcinoma	0
	MB-0396	Breast Invasive Ductal Carcinoma	0
	MB-0398	Breast Invasive Ductal Carcinoma	0.029412
	MB-0399	Breast Invasive Ductal Carcinoma	0.015748
	MB-0401	Breast Invasive Ductal Carcinoma	0.008621
	MB-0404	Breast Invasive Ductal Carcinoma	0
	MB-0406	Breast Invasive Ductal Carcinoma	0
	MB-0408	Breast Invasive Ductal Carcinoma	0.035714
	MB-0413	Breast Invasive Ductal Carcinoma	0.035714
	MB-0414	Breast Invasive Ductal Carcinoma	0
	MB-0417	Breast Invasive Ductal Carcinoma	0.01626
	MB-0418	Breast Invasive Ductal Carcinoma	0
	MB-0420	Breast Invasive Ductal Carcinoma	0.018868
	MB-0422	Breast Invasive Ductal Carcinoma	0.014286
	MB-0425	Breast Invasive Ductal Carcinoma	0
	MB-0428	Breast Invasive Ductal Carcinoma	0
	MB-0432	Breast Invasive Ductal Carcinoma	0.009901
	MB-0434	Breast Invasive Ductal Carcinoma	0
	MB-0436	Breast Invasive Ductal Carcinoma	0.00722
	MB-0442	Breast Invasive Ductal Carcinoma	0.040816
	MB-0443	Breast Invasive Ductal Carcinoma	0
	MB-0445	Breast Invasive Ductal Carcinoma	0.021739
	MB-0446	Breast Invasive Ductal Carcinoma	0
	MB-0449	Breast Invasive Ductal Carcinoma	0.005682
	MB-0452	Breast Invasive Ductal Carcinoma	0
	MB-0455	Breast Invasive Ductal Carcinoma	0
	MB-0458	Breast Invasive Ductal Carcinoma	0.036364
	MB-0462	Breast Invasive Ductal Carcinoma	0
	MB-0464	Breast Invasive Ductal Carcinoma	0
	MB-0465	Breast Invasive Ductal Carcinoma	0
	MB-0467	Breast Invasive Ductal Carcinoma	0.020101
	MB-0468	Breast Invasive Ductal Carcinoma	0.015152
	MB-0469	Breast Invasive Ductal Carcinoma	0
	MB-0474	Breast Invasive Ductal Carcinoma	0
	MB-0476	Breast Invasive Ductal Carcinoma	0.007407
	MB-0478	Breast Invasive Ductal Carcinoma	0
	MB-0479	Breast Invasive Ductal Carcinoma	0
	MB-0480	Breast Invasive Ductal Carcinoma	0
	MB-0481	Breast Invasive Ductal Carcinoma	0
	MB-0482	Breast Invasive Ductal Carcinoma	0
	MB-0483	Breast Invasive Ductal Carcinoma	0
	MB-0484	Breast Invasive Ductal Carcinoma	0
	MB-0486	Breast Invasive Ductal Carcinoma	0
	MB-0487	Breast Invasive Ductal Carcinoma	0.005682
	MB-0489	Breast Invasive Ductal Carcinoma	0.021053
	MB-0497	Breast Invasive Ductal Carcinoma	0.02381
	MB-0501	Breast Invasive Ductal Carcinoma	0.021739
	MB-0502	Breast Invasive Ductal Carcinoma	0
	MB-0503	Breast Invasive Ductal Carcinoma	0.042254
	MB-0504	Breast Invasive Ductal Carcinoma	0.018349
	MB-0505	Breast Invasive Ductal Carcinoma	0.010695
	MB-0507	Breast Invasive Ductal Carcinoma	0.023256
	MB-0508	Breast Invasive Ductal Carcinoma	0
	MB-0512	Breast Invasive Ductal Carcinoma	0.004049
	MB-0513	Breast Invasive Ductal Carcinoma	0.009346
	MB-0519	Breast Invasive Ductal Carcinoma	0
	MB-0525	Breast Invasive Ductal Carcinoma	0
	MB-0528	Breast Invasive Ductal Carcinoma	0.095238
	MB-0529	Breast Invasive Ductal Carcinoma	0
	MB-0534	Breast Invasive Ductal Carcinoma	0.025641
	MB-0535	Breast Invasive Ductal Carcinoma	0
	MB-0536	Breast Invasive Ductal Carcinoma	0
	MB-0542	Breast Invasive Ductal Carcinoma	0.012821
	MB-0544	Breast Invasive Ductal Carcinoma	0
	MB-0545	Breast Invasive Ductal Carcinoma	0
	MB-0549	Breast Invasive Ductal Carcinoma	0
	MB-0550	Breast Invasive Ductal Carcinoma	0
	MB-0552	Breast Invasive Ductal Carcinoma	0.025862
	MB-0553	Breast Invasive Ductal Carcinoma	0
	MB-0559	Breast Invasive Ductal Carcinoma	0
	MB-0568	Breast Invasive Ductal Carcinoma	0
	MB-0569	Breast Invasive Ductal Carcinoma	0
	MB-0570	Breast Invasive Ductal Carcinoma	0
	MB-0571	Breast Invasive Ductal Carcinoma	0.02381
	MB-0574	Breast Invasive Ductal Carcinoma	0.014706
	MB-0575	Breast Invasive Ductal Carcinoma	0
	MB-0576	Breast Invasive Ductal Carcinoma	0
	MB-0580	Breast Invasive Ductal Carcinoma	0
	MB-0581	Breast Invasive Ductal Carcinoma	0
	MB-0591	Breast Invasive Ductal Carcinoma	0
	MB-0597	Breast Invasive Ductal Carcinoma	0
	MB-0603	Breast Invasive Ductal Carcinoma	0
	MB-0608	Breast Invasive Ductal Carcinoma	0
	MB-0609	Breast Invasive Ductal Carcinoma	0.018018
	MB-0610	Breast Invasive Ductal Carcinoma	0
	MB-0615	Breast Invasive Ductal Carcinoma	0
	MB-0616	Breast Invasive Ductal Carcinoma	0
	MB-0623	Breast Invasive Ductal Carcinoma	0.003788
	MB-0627	Breast Invasive Ductal Carcinoma	0
	MB-0628	Breast Invasive Ductal Carcinoma	0
	MB-0631	Breast Invasive Ductal Carcinoma	0.051282
	MB-0637	Breast Invasive Ductal Carcinoma	0.006897
	MB-0639	Breast Invasive Ductal Carcinoma	0.030303
	MB-0649	Breast Invasive Ductal Carcinoma	0.018868
	MB-0662	Breast Invasive Ductal Carcinoma	0
	MB-0664	Breast Invasive Ductal Carcinoma	0.043478
	MB-0877	Breast Invasive Ductal Carcinoma	0
	MB-0880	Breast Invasive Ductal Carcinoma	0.003984
	MB-0884	Breast Invasive Ductal Carcinoma	0
	MB-0897	Breast Invasive Ductal Carcinoma	0
	MB-0899	Breast Invasive Ductal Carcinoma	0
	MB-2517	Breast Invasive Ductal Carcinoma	0
	MB-2564	Breast Invasive Ductal Carcinoma	0
	MB-2617	Breast Invasive Ductal Carcinoma	0
	MB-2618	Breast Invasive Ductal Carcinoma	0
	MB-2624	Breast Invasive Ductal Carcinoma	0
	MB-2626	Breast Invasive Ductal Carcinoma	0
	MB-2643	Breast Invasive Ductal Carcinoma	0
	MB-2669	Breast Invasive Ductal Carcinoma	0
	MB-2705	Breast Invasive Ductal Carcinoma	0
	MB-2711	Breast Invasive Ductal Carcinoma	0
	MB-2724	Breast Invasive Ductal Carcinoma	0
	MB-2728	Breast Invasive Ductal Carcinoma	0
	MB-2730	Breast Invasive Ductal Carcinoma	0
	MB-2747	Breast Invasive Ductal Carcinoma	0
	MB-2749	Breast Invasive Ductal Carcinoma	0.042553
	MB-2760	Breast Invasive Ductal Carcinoma	0
	MB-2764	Breast Invasive Ductal Carcinoma	0
	MB-2765	Breast Invasive Ductal Carcinoma	0.078947
	MB-2774	Breast Invasive Ductal Carcinoma	0.014286
	MB-2778	Breast Invasive Ductal Carcinoma	0
	MB-2779	Breast Invasive Ductal Carcinoma	0.012195
	MB-2781	Breast Invasive Ductal Carcinoma	0
	MB-2791	Breast Invasive Ductal Carcinoma	0
	MB-2792	Breast Invasive Ductal Carcinoma	0
	MB-2793	Breast Invasive Ductal Carcinoma	0.012903
	MB-2803	Breast Invasive Ductal Carcinoma	0
	MB-2814	Breast Invasive Ductal Carcinoma	0
	MB-2827	Breast Invasive Ductal Carcinoma	0
	MB-2834	Breast Invasive Ductal Carcinoma	0
	MB-2835	Breast Invasive Ductal Carcinoma	0
	MB-2838	Breast Invasive Ductal Carcinoma	0
	MB-2842	Breast Invasive Ductal Carcinoma	0
	MB-2843	Breast Invasive Ductal Carcinoma	0.020408
	MB-2846	Breast Invasive Ductal Carcinoma	0
	MB-2847	Breast Invasive Ductal Carcinoma	0
	MB-2848	Breast Invasive Ductal Carcinoma	0
	MB-2849	Breast Invasive Ductal Carcinoma	0
	MB-2895	Breast Invasive Ductal Carcinoma	0
	MB-2901	Breast Invasive Ductal Carcinoma	0
	MB-2912	Breast Invasive Ductal Carcinoma	0.015385
	MB-2916	Breast Invasive Ductal Carcinoma	0
	MB-2917	Breast Invasive Ductal Carcinoma	0
	MB-2923	Breast Invasive Ductal Carcinoma	0
	MB-2929	Breast Invasive Ductal Carcinoma	0.054054
	MB-2931	Breast Invasive Ductal Carcinoma	0
	MB-2933	Breast Invasive Ductal Carcinoma	0.0125
	MB-2951	Breast Invasive Ductal Carcinoma	0.034483
	MB-2954	Breast Invasive Ductal Carcinoma	0
	MB-2957	Breast Invasive Ductal Carcinoma	0
	MB-2960	Breast Invasive Ductal Carcinoma	0
	MB-2977	Breast Invasive Ductal Carcinoma	0
	MB-2984	Breast Invasive Ductal Carcinoma	0
	MB-2994	Breast Invasive Ductal Carcinoma	0.032
	MB-2996	Breast Invasive Ductal Carcinoma	0.025
	MB-3001	Breast Invasive Ductal Carcinoma	0
	MB-3005	Breast Invasive Ductal Carcinoma	0
	MB-3006	Breast Invasive Ductal Carcinoma	0.020408
	MB-3007	Breast Invasive Ductal Carcinoma	0
	MB-3014	Breast Invasive Ductal Carcinoma	0
	MB-3028	Breast Invasive Ductal Carcinoma	0
	MB-3031	Breast Invasive Ductal Carcinoma	0
	MB-3033	Breast Invasive Ductal Carcinoma	0
	MB-3035	Breast Invasive Ductal Carcinoma	0.032258
	MB-3046	Breast Invasive Ductal Carcinoma	0
	MB-3050	Breast Invasive Ductal Carcinoma	0.035714
	MB-3057	Breast Invasive Ductal Carcinoma	0
	MB-3067	Breast Invasive Ductal Carcinoma	0.027778
	MB-3088	Breast Invasive Ductal Carcinoma	0
	MB-3104	Breast Invasive Ductal Carcinoma	0
	MB-3105	Breast Invasive Ductal Carcinoma	0
	MB-3121	Breast Invasive Ductal Carcinoma	0
	MB-3122	Breast Invasive Ductal Carcinoma	0
	MB-3165	Breast Invasive Ductal Carcinoma	0
	MB-3167	Breast Invasive Ductal Carcinoma	0
	MB-3171	Breast Invasive Ductal Carcinoma	0.014925
	MB-3211	Breast Invasive Ductal Carcinoma	0.005747
	MB-3218	Breast Invasive Ductal Carcinoma	0
	MB-3253	Breast Invasive Ductal Carcinoma	0.011029
	MB-3271	Breast Invasive Ductal Carcinoma	0.004608
	MB-3277	Breast Invasive Ductal Carcinoma	0.013158
	MB-3298	Breast Invasive Ductal Carcinoma	0
	MB-3300	Breast Invasive Ductal Carcinoma	0
	MB-3328	Breast Invasive Ductal Carcinoma	0
	MB-3341	Breast Invasive Ductal Carcinoma	0
	MB-3351	Breast Invasive Ductal Carcinoma	0
	MB-3360	Breast Invasive Ductal Carcinoma	0
	MB-3361	Breast Invasive Ductal Carcinoma	0
	MB-3367	Breast Invasive Ductal Carcinoma	0.022727
	MB-3371	Breast Invasive Ductal Carcinoma	0
	MB-3382	Breast Invasive Ductal Carcinoma	0
	MB-3383	Breast Invasive Ductal Carcinoma	0
	MB-3395	Breast Invasive Ductal Carcinoma	0
	MB-3403	Breast Invasive Ductal Carcinoma	0
	MB-3412	Breast Invasive Ductal Carcinoma	0
	MB-3436	Breast Invasive Ductal Carcinoma	0
	MB-3437	Breast Invasive Ductal Carcinoma	0
	MB-3452	Breast Invasive Ductal Carcinoma	0
	MB-3453	Breast Invasive Ductal Carcinoma	0
	MB-3459	Breast Invasive Ductal Carcinoma	0.030769
	MB-3462	Breast Invasive Ductal Carcinoma	0
	MB-3470	Breast Invasive Ductal Carcinoma	0.035714
	MB-3479	Breast Invasive Ductal Carcinoma	0
	MB-3492	Breast Invasive Ductal Carcinoma	0
	MB-3497	Breast Invasive Ductal Carcinoma	0
	MB-3502	Breast Invasive Ductal Carcinoma	0
	MB-3526	Breast Invasive Ductal Carcinoma	0
	MB-3548	Breast Invasive Ductal Carcinoma	0
	MB-3600	Breast Invasive Ductal Carcinoma	0.013245
	MB-3707	Breast Invasive Ductal Carcinoma	0
	MB-3711	Breast Invasive Ductal Carcinoma	0
	MB-3748	Breast Invasive Ductal Carcinoma	0.034483
	MB-3752	Breast Invasive Ductal Carcinoma	0
	MB-3823	Breast Invasive Ductal Carcinoma	0.026316
	MB-3838	Breast Invasive Ductal Carcinoma	0
	MB-3842	Breast Invasive Ductal Carcinoma	0
	MB-3865	Breast Invasive Ductal Carcinoma	0
	MB-3874	Breast Invasive Ductal Carcinoma	0.009259
	MB-3978	Breast Invasive Ductal Carcinoma	0
	MB-4001	Breast Invasive Ductal Carcinoma	0.014286
	MB-4004	Breast Invasive Ductal Carcinoma	0
	MB-4012	Breast Invasive Ductal Carcinoma	0
	MB-4015	Breast Invasive Ductal Carcinoma	0
	MB-4024	Breast Invasive Ductal Carcinoma	0.059322
	MB-4059	Breast Invasive Ductal Carcinoma	0.036765
	MB-4079	Breast Invasive Ductal Carcinoma	0.009009
	MB-4091	Breast Invasive Ductal Carcinoma	0.00625
	MB-4098	Breast Invasive Ductal Carcinoma	0
	MB-4120	Breast Invasive Ductal Carcinoma	0.02381
	MB-4126	Breast Invasive Ductal Carcinoma	0
	MB-4127	Breast Invasive Ductal Carcinoma	0
	MB-4139	Breast Invasive Ductal Carcinoma	0.009009
	MB-4141	Breast Invasive Ductal Carcinoma	0.02439
	MB-4145	Breast Invasive Ductal Carcinoma	0.042857
	MB-4146	Breast Invasive Ductal Carcinoma	0
	MB-4148	Breast Invasive Ductal Carcinoma	0.012195
	MB-4154	Breast Invasive Ductal Carcinoma	0.014184
	MB-4173	Breast Invasive Ductal Carcinoma	0
	MB-4189	Breast Invasive Ductal Carcinoma	0
	MB-4213	Breast Invasive Ductal Carcinoma	0
	MB-4222	Breast Invasive Ductal Carcinoma	0
	MB-4224	Breast Invasive Ductal Carcinoma	0.006993
	MB-4230	Breast Invasive Ductal Carcinoma	0
	MB-4236	Breast Invasive Ductal Carcinoma	0.029412
	MB-4254	Breast Invasive Ductal Carcinoma	0
	MB-4264	Breast Invasive Ductal Carcinoma	0.017544
	MB-4266	Breast Invasive Ductal Carcinoma	0
	MB-4270	Breast Invasive Ductal Carcinoma	0.015152
	MB-4274	Breast Invasive Ductal Carcinoma	0.014388
	MB-4276	Breast Invasive Ductal Carcinoma	0
	MB-4278	Breast Invasive Ductal Carcinoma	0.016736
	MB-4281	Breast Invasive Ductal Carcinoma	0
	MB-4282	Breast Invasive Ductal Carcinoma	0.034483
	MB-4283	Breast Invasive Ductal Carcinoma	0
	MB-4300	Breast Invasive Ductal Carcinoma	0.046154
	MB-4310	Breast Invasive Ductal Carcinoma	0
	MB-4318	Breast Invasive Ductal Carcinoma	0
	MB-4333	Breast Invasive Ductal Carcinoma	0.033333
	MB-4339	Breast Invasive Ductal Carcinoma	0
	MB-4348	Breast Invasive Ductal Carcinoma	0
	MB-4353	Breast Invasive Ductal Carcinoma	0.008403
	MB-4354	Breast Invasive Ductal Carcinoma	0
	MB-4360	Breast Invasive Ductal Carcinoma	0
	MB-4362	Breast Invasive Ductal Carcinoma	0.011765
	MB-4368	Breast Invasive Ductal Carcinoma	0.016807
	MB-4375	Breast Invasive Ductal Carcinoma	0
	MB-4381	Breast Invasive Ductal Carcinoma	0
	MB-4395	Breast Invasive Ductal Carcinoma	0
	MB-4407	Breast Invasive Ductal Carcinoma	0
	MB-4408	Breast Invasive Ductal Carcinoma	0
	MB-4417	Breast Invasive Ductal Carcinoma	0
	MB-4426	Breast Invasive Ductal Carcinoma	0
	MB-4434	Breast Invasive Ductal Carcinoma	0
	MB-4442	Breast Invasive Ductal Carcinoma	0.014851
	MB-4529	Breast Invasive Ductal Carcinoma	0
	MB-4591	Breast Invasive Ductal Carcinoma	0.011321
	MB-4593	Breast Invasive Ductal Carcinoma	0
	MB-4598	Breast Invasive Ductal Carcinoma	0.006329
	MB-4599	Breast Invasive Ductal Carcinoma	0.008889
	MB-4601	Breast Invasive Ductal Carcinoma	0.007463
	MB-4603	Breast Invasive Ductal Carcinoma	0.004785
	MB-4607	Breast Invasive Ductal Carcinoma	0.026667
	MB-4616	Breast Invasive Ductal Carcinoma	0.014286
	MB-4621	Breast Invasive Ductal Carcinoma	0
	MB-4622	Breast Invasive Ductal Carcinoma	0
	MB-4626	Breast Invasive Ductal Carcinoma	0.028571
	MB-4639	Breast Invasive Ductal Carcinoma	0
	MB-4640	Breast Invasive Ductal Carcinoma	0.009174
	MB-4641	Breast Invasive Ductal Carcinoma	0.018433
	MB-4642	Breast Invasive Ductal Carcinoma	0
	MB-4643	Breast Invasive Ductal Carcinoma	0.003247
	MB-4644	Breast Invasive Ductal Carcinoma	0
	MB-4648	Breast Invasive Ductal Carcinoma	0
	MB-4651	Breast Invasive Ductal Carcinoma	0.027778
	MB-4653	Breast Invasive Ductal Carcinoma	0.003401
	MB-4661	Breast Invasive Ductal Carcinoma	0
	MB-4663	Breast Invasive Ductal Carcinoma	0.006536
	MB-4665	Breast Invasive Ductal Carcinoma	0.008596
	MB-4666	Breast Invasive Ductal Carcinoma	0.026667
	MB-4669	Breast Invasive Ductal Carcinoma	0
	MB-4670	Breast Invasive Ductal Carcinoma	0
	MB-4671	Breast Invasive Ductal Carcinoma	0.05814
	MB-4672	Breast Invasive Ductal Carcinoma	0.008403
	MB-4673	Breast Invasive Ductal Carcinoma	0.064516
	MB-4674	Breast Invasive Ductal Carcinoma	0.04065
	MB-4675	Breast Invasive Ductal Carcinoma	0.057143
	MB-4682	Breast Invasive Ductal Carcinoma	0.026667
	MB-4685	Breast Invasive Ductal Carcinoma	0
	MB-4686	Breast Invasive Ductal Carcinoma	0.005181
	MB-4688	Breast Invasive Ductal Carcinoma	0.013333
	MB-4691	Breast Invasive Ductal Carcinoma	0
	MB-4692	Breast Invasive Ductal Carcinoma	0
	MB-4694	Breast Invasive Ductal Carcinoma	0.043478
	MB-4696	Breast Invasive Ductal Carcinoma	0.018182
	MB-4701	Breast Invasive Ductal Carcinoma	0.081081
	MB-4702	Breast Invasive Ductal Carcinoma	0
	MB-4706	Breast Invasive Ductal Carcinoma	0.010417
	MB-4709	Breast Invasive Ductal Carcinoma	0.033613
	MB-4710	Breast Invasive Ductal Carcinoma	0.016393
	MB-4711	Breast Invasive Ductal Carcinoma	0.114286
	MB-4712	Breast Invasive Ductal Carcinoma	0
	MB-4714	Breast Invasive Ductal Carcinoma	0.003937
	MB-4715	Breast Invasive Ductal Carcinoma	0.004219
	MB-4717	Breast Invasive Ductal Carcinoma	0
	MB-4719	Breast Invasive Ductal Carcinoma	0.015873
	MB-4722	Breast Invasive Ductal Carcinoma	0
	MB-4723	Breast Invasive Ductal Carcinoma	0
	MB-4724	Breast Invasive Ductal Carcinoma	0.009524
	MB-4725	Breast Invasive Ductal Carcinoma	0.00578
	MB-4729	Breast Invasive Ductal Carcinoma	0
	MB-4731	Breast Invasive Ductal Carcinoma	0
	MB-4732	Breast Invasive Ductal Carcinoma	0.005952
	MB-4733	Breast Invasive Ductal Carcinoma	0.020408
	MB-4735	Breast Invasive Ductal Carcinoma	0.006479
	MB-4737	Breast Invasive Ductal Carcinoma	0
	MB-4744	Breast Invasive Ductal Carcinoma	0
	MB-4746	Breast Invasive Ductal Carcinoma	0
	MB-4752	Breast Invasive Ductal Carcinoma	0.013158
	MB-4757	Breast Invasive Ductal Carcinoma	0
	MB-4758	Breast Invasive Ductal Carcinoma	0.008696
	MB-4762	Breast Invasive Ductal Carcinoma	0.003175
	MB-4763	Breast Invasive Ductal Carcinoma	0.006289
	MB-4767	Breast Invasive Ductal Carcinoma	0.02439
	MB-4769	Breast Invasive Ductal Carcinoma	0.008333
	MB-4770	Breast Invasive Ductal Carcinoma	0.035714
	MB-4771	Breast Invasive Ductal Carcinoma	0
	MB-4779	Breast Invasive Ductal Carcinoma	0
	MB-4782	Breast Invasive Ductal Carcinoma	0
	MB-4784	Breast Invasive Ductal Carcinoma	0
	MB-4785	Breast Invasive Ductal Carcinoma	0.014706
	MB-4787	Breast Invasive Ductal Carcinoma	0
	MB-4790	Breast Invasive Ductal Carcinoma	0
	MB-4791	Breast Invasive Ductal Carcinoma	0.025641
	MB-4793	Breast Invasive Ductal Carcinoma	0.012658
	MB-4794	Breast Invasive Ductal Carcinoma	0.021429
	MB-4796	Breast Invasive Ductal Carcinoma	0.020408
	MB-4801	Breast Invasive Ductal Carcinoma	0.02381
	MB-4802	Breast Invasive Ductal Carcinoma	0.008547
	MB-4805	Breast Invasive Ductal Carcinoma	0.003861
	MB-4806	Breast Invasive Ductal Carcinoma	0.009091
	MB-4809	Breast Invasive Ductal Carcinoma	0.020408
	MB-4814	Breast Invasive Ductal Carcinoma	0.00692
	MB-4820	Breast Invasive Ductal Carcinoma	0.037879
	MB-4825	Breast Invasive Ductal Carcinoma	0.008333
	MB-4827	Breast Invasive Ductal Carcinoma	0.02521
	MB-4832	Breast Invasive Ductal Carcinoma	0.015504
	MB-4836	Breast Invasive Ductal Carcinoma	0
	MB-4839	Breast Invasive Ductal Carcinoma	0
	MB-4843	Breast Invasive Ductal Carcinoma	0
	MB-4851	Breast Invasive Ductal Carcinoma	0.016807
	MB-4855	Breast Invasive Ductal Carcinoma	0
	MB-4858	Breast Invasive Ductal Carcinoma	0.010989
	MB-4859	Breast Invasive Ductal Carcinoma	0
	MB-4865	Breast Invasive Ductal Carcinoma	0
	MB-4866	Breast Invasive Ductal Carcinoma	0
	MB-4867	Breast Invasive Ductal Carcinoma	0.026316
	MB-4869	Breast Invasive Ductal Carcinoma	0
	MB-4871	Breast Invasive Ductal Carcinoma	0
	MB-4873	Breast Invasive Ductal Carcinoma	0.007519
	MB-4880	Breast Invasive Ductal Carcinoma	0.024096
	MB-4881	Breast Invasive Ductal Carcinoma	0.006289
	MB-4883	Breast Invasive Ductal Carcinoma	0.017544
	MB-4886	Breast Invasive Ductal Carcinoma	0.012422
	MB-4887	Breast Invasive Ductal Carcinoma	0
	MB-4888	Breast Invasive Ductal Carcinoma	0.025641
	MB-4893	Breast Invasive Ductal Carcinoma	0.006289
	MB-4894	Breast Invasive Ductal Carcinoma	0.075
	MB-4896	Breast Invasive Ductal Carcinoma	0
	MB-4898	Breast Invasive Ductal Carcinoma	0
	MB-4899	Breast Invasive Ductal Carcinoma	0.017857
	MB-4900	Breast Invasive Ductal Carcinoma	0.015152
	MB-4904	Breast Invasive Ductal Carcinoma	0.016949
	MB-4908	Breast Invasive Ductal Carcinoma	0.030612
	MB-4911	Breast Invasive Ductal Carcinoma	0.011628
	MB-4912	Breast Invasive Ductal Carcinoma	0
	MB-4925	Breast Invasive Ductal Carcinoma	0
	MB-4928	Breast Invasive Ductal Carcinoma	0
	MB-4929	Breast Invasive Ductal Carcinoma	0.011834
	MB-4933	Breast Invasive Ductal Carcinoma	0.00789
	MB-4934	Breast Invasive Ductal Carcinoma	0.028571
	MB-4935	Breast Invasive Ductal Carcinoma	0.00939
	MB-4937	Breast Invasive Ductal Carcinoma	0
	MB-4941	Breast Invasive Ductal Carcinoma	0
	MB-4942	Breast Invasive Ductal Carcinoma	0.029412
	MB-4944	Breast Invasive Ductal Carcinoma	0.010753
	MB-4945	Breast Invasive Ductal Carcinoma	0.004505
	MB-4949	Breast Invasive Ductal Carcinoma	0.02439
	MB-4950	Breast Invasive Ductal Carcinoma	0.02
	MB-4952	Breast Invasive Ductal Carcinoma	0.060606
	MB-4959	Breast Invasive Ductal Carcinoma	0.003106
	MB-4961	Breast Invasive Ductal Carcinoma	0.02454
	MB-4967	Breast Invasive Ductal Carcinoma	0
	MB-4969	Breast Invasive Ductal Carcinoma	0
	MB-4970	Breast Invasive Ductal Carcinoma	0
	MB-4976	Breast Invasive Ductal Carcinoma	0
	MB-4977	Breast Invasive Ductal Carcinoma	0.0059
	MB-4986	Breast Invasive Ductal Carcinoma	0
	MB-4987	Breast Invasive Ductal Carcinoma	0.018957
	MB-4991	Breast Invasive Ductal Carcinoma	0.037037
	MB-4993	Breast Invasive Ductal Carcinoma	0.018519
	MB-4994	Breast Invasive Ductal Carcinoma	0
	MB-4996	Breast Invasive Ductal Carcinoma	0.013158
	MB-4999	Breast Invasive Ductal Carcinoma	0.012987
	MB-5001	Breast Invasive Ductal Carcinoma	0.032258
	MB-5013	Breast Invasive Ductal Carcinoma	0.012987
	MB-5014	Breast Invasive Ductal Carcinoma	0.013158
	MB-5015	Breast Invasive Ductal Carcinoma	0
	MB-5018	Breast Invasive Ductal Carcinoma	0
	MB-5019	Breast Invasive Ductal Carcinoma	0.025974
	MB-5039	Breast Invasive Ductal Carcinoma	0
	MB-5040	Breast Invasive Ductal Carcinoma	0
	MB-5041	Breast Invasive Ductal Carcinoma	0
	MB-5044	Breast Invasive Ductal Carcinoma	0
	MB-5045	Breast Invasive Ductal Carcinoma	0.016667
	MB-5052	Breast Invasive Ductal Carcinoma	0
	MB-5053	Breast Invasive Ductal Carcinoma	0.021739
	MB-5054	Breast Invasive Ductal Carcinoma	0.076923
	MB-5057	Breast Invasive Ductal Carcinoma	0
	MB-5060	Breast Invasive Ductal Carcinoma	0
	MB-5062	Breast Invasive Ductal Carcinoma	0.031746
	MB-5063	Breast Invasive Ductal Carcinoma	0
	MB-5064	Breast Invasive Ductal Carcinoma	0
	MB-5066	Breast Invasive Ductal Carcinoma	0
	MB-5068	Breast Invasive Ductal Carcinoma	0
	MB-5070	Breast Invasive Ductal Carcinoma	0
	MB-5072	Breast Invasive Ductal Carcinoma	0
	MB-5073	Breast Invasive Ductal Carcinoma	0.044444
	MB-5078	Breast Invasive Ductal Carcinoma	0.033333
	MB-5079	Breast Invasive Ductal Carcinoma	0.005181
	MB-5081	Breast Invasive Ductal Carcinoma	0.033333
	MB-5084	Breast Invasive Ductal Carcinoma	0
	MB-5086	Breast Invasive Ductal Carcinoma	0
	MB-5088	Breast Invasive Ductal Carcinoma	0.033708
	MB-5092	Breast Invasive Ductal Carcinoma	0.007463
	MB-5098	Breast Invasive Ductal Carcinoma	0.012397
	MB-5101	Breast Invasive Ductal Carcinoma	0
	MB-5105	Breast Invasive Ductal Carcinoma	0
	MB-5107	Breast Invasive Ductal Carcinoma	0.007937
	MB-5114	Breast Invasive Ductal Carcinoma	0.024691
	MB-5115	Breast Invasive Ductal Carcinoma	0.009091
	MB-5116	Breast Invasive Ductal Carcinoma	0.037037
	MB-5118	Breast Invasive Ductal Carcinoma	0.017857
	MB-5120	Breast Invasive Ductal Carcinoma	0
	MB-5123	Breast Invasive Ductal Carcinoma	0.047619
	MB-5124	Breast Invasive Ductal Carcinoma	0
	MB-5126	Breast Invasive Ductal Carcinoma	0
	MB-5134	Breast Invasive Ductal Carcinoma	0.00578
	MB-5135	Breast Invasive Ductal Carcinoma	0
	MB-5139	Breast Invasive Ductal Carcinoma	0
	MB-5144	Breast Invasive Ductal Carcinoma	0
	MB-5161	Breast Invasive Ductal Carcinoma	0
	MB-5164	Breast Invasive Ductal Carcinoma	0.029412
	MB-5167	Breast Invasive Ductal Carcinoma	0.008772
	MB-5171	Breast Invasive Ductal Carcinoma	0
	MB-5172	Breast Invasive Ductal Carcinoma	0
	MB-5174	Breast Invasive Ductal Carcinoma	0
	MB-5186	Breast Invasive Ductal Carcinoma	0
	MB-5197	Breast Invasive Ductal Carcinoma	0
	MB-5200	Breast Invasive Ductal Carcinoma	0
	MB-5208	Breast Invasive Ductal Carcinoma	0
	MB-5211	Breast Invasive Ductal Carcinoma	0.004082
	MB-5212	Breast Invasive Ductal Carcinoma	0
	MB-5214	Breast Invasive Ductal Carcinoma	0
	MB-5215	Breast Invasive Ductal Carcinoma	0
	MB-5218	Breast Invasive Ductal Carcinoma	0
	MB-5221	Breast Invasive Ductal Carcinoma	0.0125
	MB-5222	Breast Invasive Ductal Carcinoma	0
	MB-5223	Breast Invasive Ductal Carcinoma	0.009615
	MB-5224	Breast Invasive Ductal Carcinoma	0
	MB-5225	Breast Invasive Ductal Carcinoma	0
	MB-5227	Breast Invasive Ductal Carcinoma	0.05814
	MB-5232	Breast Invasive Ductal Carcinoma	0
	MB-5233	Breast Invasive Ductal Carcinoma	0
	MB-5238	Breast Invasive Ductal Carcinoma	0.011364
	MB-5244	Breast Invasive Ductal Carcinoma	0
	MB-5251	Breast Invasive Ductal Carcinoma	0
	MB-5256	Breast Invasive Ductal Carcinoma	0.004673
	MB-5261	Breast Invasive Ductal Carcinoma	0
	MB-5264	Breast Invasive Ductal Carcinoma	0
	MB-5266	Breast Invasive Ductal Carcinoma	0.027027
	MB-5271	Breast Invasive Ductal Carcinoma	0.025424
	MB-5273	Breast Invasive Ductal Carcinoma	0.019231
	MB-5275	Breast Invasive Ductal Carcinoma	0.056604
	MB-5279	Breast Invasive Ductal Carcinoma	0.016667
	MB-5281	Breast Invasive Ductal Carcinoma	0
	MB-5287	Breast Invasive Ductal Carcinoma	0
	MB-5288	Breast Invasive Ductal Carcinoma	0
	MB-5306	Breast Invasive Ductal Carcinoma	0
	MB-5311	Breast Invasive Ductal Carcinoma	0
	MB-5312	Breast Invasive Ductal Carcinoma	0.015385
	MB-5315	Breast Invasive Ductal Carcinoma	0.085714
	MB-5331	Breast Invasive Ductal Carcinoma	0.017857
	MB-5334	Breast Invasive Ductal Carcinoma	0
	MB-5335	Breast Invasive Ductal Carcinoma	0.012422
	MB-5338	Breast Invasive Ductal Carcinoma	0
	MB-5339	Breast Invasive Ductal Carcinoma	0.015873
	MB-5348	Breast Invasive Ductal Carcinoma	0
	MB-5361	Breast Invasive Ductal Carcinoma	0.00639
	MB-5364	Breast Invasive Ductal Carcinoma	0
	MB-5399	Breast Invasive Ductal Carcinoma	0.017544
	MB-5402	Breast Invasive Ductal Carcinoma	0
	MB-5410	Breast Invasive Ductal Carcinoma	0.00885
	MB-5425	Breast Invasive Ductal Carcinoma	0
	MB-5427	Breast Invasive Ductal Carcinoma	0.013423
	MB-5433	Breast Invasive Ductal Carcinoma	0
	MB-5440	Breast Invasive Ductal Carcinoma	0.005181
	MB-5442	Breast Invasive Ductal Carcinoma	0.030303
	MB-5491	Breast Invasive Ductal Carcinoma	0.040698
	MB-5498	Breast Invasive Ductal Carcinoma	0.053333
	MB-5519	Breast Invasive Ductal Carcinoma	0
	MB-5530	Breast Invasive Ductal Carcinoma	0
	MB-5558	Breast Invasive Ductal Carcinoma	0
	MB-5582	Breast Invasive Ductal Carcinoma	0
	MB-5614	Breast Invasive Ductal Carcinoma	0.013889
	MB-5634	Breast Invasive Ductal Carcinoma	0.024793
	MB-5640	Breast Invasive Ductal Carcinoma	0.014286
	MB-5641	Breast Invasive Ductal Carcinoma	0.013274
	MB-5656	Breast Invasive Ductal Carcinoma	0.058824
	MB-6010	Breast Invasive Ductal Carcinoma	0.018519
	MB-6011	Breast Invasive Ductal Carcinoma	0.017751
	MB-6018	Breast Invasive Ductal Carcinoma	0.038462
	MB-6024	Breast Invasive Ductal Carcinoma	0
	MB-6026	Breast Invasive Ductal Carcinoma	0.033898
	MB-6030	Breast Invasive Ductal Carcinoma	0.036496
	MB-6036	Breast Invasive Ductal Carcinoma	0
	MB-6039	Breast Invasive Ductal Carcinoma	0
	MB-6042	Breast Invasive Ductal Carcinoma	0
	MB-6044	Breast Invasive Ductal Carcinoma	0
	MB-6048	Breast Invasive Ductal Carcinoma	0
	MB-6050	Breast Invasive Ductal Carcinoma	0
	MB-6052	Breast Invasive Ductal Carcinoma	0
	MB-6058	Breast Invasive Ductal Carcinoma	0
	MB-6059	Breast Invasive Ductal Carcinoma	0
	MB-6062	Breast Invasive Ductal Carcinoma	0.017442
	MB-6063	Breast Invasive Ductal Carcinoma	0
	MB-6065	Breast Invasive Ductal Carcinoma	0.010989
	MB-6068	Breast Invasive Ductal Carcinoma	0.008621
	MB-6069	Breast Invasive Ductal Carcinoma	0
	MB-6071	Breast Invasive Ductal Carcinoma	0.004016
	MB-6075	Breast Invasive Ductal Carcinoma	0
	MB-6077	Breast Invasive Ductal Carcinoma	0
	MB-6079	Breast Invasive Ductal Carcinoma	0.015625
	MB-6080	Breast Invasive Ductal Carcinoma	0.042553
	MB-6082	Breast Invasive Ductal Carcinoma	0.007143
	MB-6083	Breast Invasive Ductal Carcinoma	0
	MB-6085	Breast Invasive Ductal Carcinoma	0.01105
	MB-6097	Breast Invasive Ductal Carcinoma	0.018072
	MB-6098	Breast Invasive Ductal Carcinoma	0.047809
	MB-6100	Breast Invasive Ductal Carcinoma	0.022124
	MB-6101	Breast Invasive Ductal Carcinoma	0.048193
	MB-6108	Breast Invasive Ductal Carcinoma	0.005236
	MB-6113	Breast Invasive Ductal Carcinoma	0.030488
	MB-6114	Breast Invasive Ductal Carcinoma	0.030303
	MB-6116	Breast Invasive Ductal Carcinoma	0.030303
	MB-6118	Breast Invasive Ductal Carcinoma	0.035714
	MB-6122	Breast Invasive Ductal Carcinoma	0.014563
	MB-6124	Breast Invasive Ductal Carcinoma	0.027273
	MB-6125	Breast Invasive Ductal Carcinoma	0.030612
	MB-6131	Breast Invasive Ductal Carcinoma	0.004505
	MB-6143	Breast Invasive Ductal Carcinoma	0.044643
	MB-6146	Breast Invasive Ductal Carcinoma	0
	MB-6149	Breast Invasive Ductal Carcinoma	0.036364
	MB-6150	Breast Invasive Ductal Carcinoma	0
	MB-6152	Breast Invasive Ductal Carcinoma	0.043478
	MB-6156	Breast Invasive Ductal Carcinoma	0
	MB-6160	Breast Invasive Ductal Carcinoma	0.004566
	MB-6164	Breast Invasive Ductal Carcinoma	0.028571
	MB-6171	Breast Invasive Ductal Carcinoma	0
	MB-6178	Breast Invasive Ductal Carcinoma	0.083333
	MB-6181	Breast Invasive Ductal Carcinoma	0
	MB-6184	Breast Invasive Ductal Carcinoma	0
	MB-6187	Breast Invasive Ductal Carcinoma	0
	MB-6188	Breast Invasive Ductal Carcinoma	0
	MB-6201	Breast Invasive Ductal Carcinoma	0.009901
	MB-6204	Breast Invasive Ductal Carcinoma	0
	MB-6211	Breast Invasive Ductal Carcinoma	0.011364
	MB-6214	Breast Invasive Ductal Carcinoma	0
	MB-6218	Breast Invasive Ductal Carcinoma	0
	MB-6223	Breast Invasive Ductal Carcinoma	0
	MB-6225	Breast Invasive Ductal Carcinoma	0
	MB-6228	Breast Invasive Ductal Carcinoma	0
	MB-6229	Breast Invasive Ductal Carcinoma	0
	MB-6230	Breast Invasive Ductal Carcinoma	0.014286
	MB-6231	Breast Invasive Ductal Carcinoma	0.018182
	MB-6245	Breast Invasive Ductal Carcinoma	0
	MB-6246	Breast Invasive Ductal Carcinoma	0
	MB-6256	Breast Invasive Ductal Carcinoma	0
	MB-6257	Breast Invasive Ductal Carcinoma	0.036458
	MB-6263	Breast Invasive Ductal Carcinoma	0.007463
	MB-6271	Breast Invasive Ductal Carcinoma	0
	MB-6281	Breast Invasive Ductal Carcinoma	0
	MB-6297	Breast Invasive Ductal Carcinoma	0
	MB-6300	Breast Invasive Ductal Carcinoma	0
	MB-6302	Breast Invasive Ductal Carcinoma	0
	MB-6306	Breast Invasive Ductal Carcinoma	0
	MB-6312	Breast Invasive Ductal Carcinoma	0
	MB-6317	Breast Invasive Ductal Carcinoma	0
	MB-6318	Breast Invasive Ductal Carcinoma	0.071429
	MB-6328	Breast Invasive Ductal Carcinoma	0
	MB-6329	Breast Invasive Ductal Carcinoma	0.009091
	MB-6330	Breast Invasive Ductal Carcinoma	0.019355
	MB-6334	Breast Invasive Ductal Carcinoma	0
	MB-6359	Breast Invasive Ductal Carcinoma	0
	MB-6363	Breast Invasive Ductal Carcinoma	0
	MB-7002	Breast Invasive Ductal Carcinoma	0.005405
	MB-7005	Breast Invasive Ductal Carcinoma	0
	MB-7006	Breast Invasive Ductal Carcinoma	0.009524
	MB-7007	Breast Invasive Ductal Carcinoma	0
	MB-7008	Breast Invasive Ductal Carcinoma	0.016
	MB-7009	Breast Invasive Ductal Carcinoma	0
	MB-7010	Breast Invasive Ductal Carcinoma	0
	MB-7012	Breast Invasive Ductal Carcinoma	0
	MB-7015	Breast Invasive Ductal Carcinoma	0.007353
	MB-7018	Breast Invasive Ductal Carcinoma	0.019417
	MB-7019	Breast Invasive Ductal Carcinoma	0
	MB-7020	Breast Invasive Ductal Carcinoma	0.005882
	MB-7022	Breast Invasive Ductal Carcinoma	0.008621
	MB-7026	Breast Invasive Ductal Carcinoma	0.003817
	MB-7029	Breast Invasive Ductal Carcinoma	0.026316
	MB-7031	Breast Invasive Ductal Carcinoma	0
	MB-7035	Breast Invasive Ductal Carcinoma	0.015873
	MB-7036	Breast Invasive Ductal Carcinoma	0.027027
	MB-7037	Breast Invasive Ductal Carcinoma	0
	MB-7038	Breast Invasive Ductal Carcinoma	0
	MB-7040	Breast Invasive Ductal Carcinoma	0
	MB-7046	Breast Invasive Ductal Carcinoma	0
	MB-7048	Breast Invasive Ductal Carcinoma	0
	MB-7049	Breast Invasive Ductal Carcinoma	0.007143
	MB-7050	Breast Invasive Ductal Carcinoma	0.030303
	MB-7051	Breast Invasive Ductal Carcinoma	0
	MB-7052	Breast Invasive Ductal Carcinoma	0.012821
	MB-7053	Breast Invasive Ductal Carcinoma	0
	MB-7055	Breast Invasive Ductal Carcinoma	0
	MB-7056	Breast Invasive Ductal Carcinoma	0
	MB-7057	Breast Invasive Ductal Carcinoma	0.025
	MB-7058	Breast Invasive Ductal Carcinoma	0.017857
	MB-7061	Breast Invasive Ductal Carcinoma	0.019481
	MB-7065	Breast Invasive Ductal Carcinoma	0
	MB-7066	Breast Invasive Ductal Carcinoma	0
	MB-7068	Breast Invasive Ductal Carcinoma	0
	MB-7070	Breast Invasive Ductal Carcinoma	0
	MB-7074	Breast Invasive Ductal Carcinoma	0
	MB-7079	Breast Invasive Ductal Carcinoma	0.015385
	MB-7080	Breast Invasive Ductal Carcinoma	0.035088
	MB-7083	Breast Invasive Ductal Carcinoma	0
	MB-7087	Breast Invasive Ductal Carcinoma	0.02381
	MB-7088	Breast Invasive Ductal Carcinoma	0
	MB-7090	Breast Invasive Ductal Carcinoma	0
	MB-7091	Breast Invasive Ductal Carcinoma	0
	MB-7093	Breast Invasive Ductal Carcinoma	0
	MB-7095	Breast Invasive Ductal Carcinoma	0.013158
	MB-7096	Breast Invasive Ductal Carcinoma	0
	MB-7099	Breast Invasive Ductal Carcinoma	0
	MB-7100	Breast Invasive Ductal Carcinoma	0
	MB-7104	Breast Invasive Ductal Carcinoma	0.007692
	MB-7107	Breast Invasive Ductal Carcinoma	0
	MB-7109	Breast Invasive Ductal Carcinoma	0
	MB-7113	Breast Invasive Ductal Carcinoma	0.066667
	MB-7115	Breast Invasive Ductal Carcinoma	0
	MB-7116	Breast Invasive Ductal Carcinoma	0
	MB-7118	Breast Invasive Ductal Carcinoma	0.005952
	MB-7119	Breast Invasive Ductal Carcinoma	0.027778
	MB-7122	Breast Invasive Ductal Carcinoma	0.015625
	MB-7137	Breast Invasive Ductal Carcinoma	0
	MB-7138	Breast Invasive Ductal Carcinoma	0
	MB-7141	Breast Invasive Ductal Carcinoma	0.008621
	MB-7144	Breast Invasive Ductal Carcinoma	0.044643
	MB-7151	Breast Invasive Ductal Carcinoma	0
	MB-7153	Breast Invasive Ductal Carcinoma	0
	MB-7154	Breast Invasive Ductal Carcinoma	0
	MB-7157	Breast Invasive Ductal Carcinoma	0.012658
	MB-7159	Breast Invasive Ductal Carcinoma	0
	MB-7160	Breast Invasive Ductal Carcinoma	0.006135
	MB-7161	Breast Invasive Ductal Carcinoma	0
	MB-7162	Breast Invasive Ductal Carcinoma	0
	MB-7164	Breast Invasive Ductal Carcinoma	0
	MB-7167	Breast Invasive Ductal Carcinoma	0
	MB-7170	Breast Invasive Ductal Carcinoma	0.010204
	MB-7171	Breast Invasive Ductal Carcinoma	0
	MB-7174	Breast Invasive Ductal Carcinoma	0
	MB-7182	Breast Invasive Ductal Carcinoma	0
	MB-7199	Breast Invasive Ductal Carcinoma	0
	MB-7200	Breast Invasive Ductal Carcinoma	0
	MB-7208	Breast Invasive Ductal Carcinoma	0
	MB-7217	Breast Invasive Ductal Carcinoma	0
	MB-7228	Breast Invasive Ductal Carcinoma	0
	MB-7232	Breast Invasive Ductal Carcinoma	0
	MB-7233	Breast Invasive Ductal Carcinoma	0
	MB-7237	Breast Invasive Ductal Carcinoma	0
	MB-7241	Breast Invasive Ductal Carcinoma	0
	MB-7243	Breast Invasive Ductal Carcinoma	0
	MB-7250	Breast Invasive Ductal Carcinoma	0.028986
	MB-7251	Breast Invasive Ductal Carcinoma	0
	MB-7253	Breast Invasive Ductal Carcinoma	0
	MB-7254	Breast Invasive Ductal Carcinoma	0
	MB-7256	Breast Invasive Ductal Carcinoma	0
	MB-7262	Breast Invasive Ductal Carcinoma	0
	MB-7268	Breast Invasive Ductal Carcinoma	0.003436
	MB-7275	Breast Invasive Ductal Carcinoma	0
	MB-7278	Breast Invasive Ductal Carcinoma	0
	MB-7279	Breast Invasive Ductal Carcinoma	0
	MB-7281	Breast Invasive Ductal Carcinoma	0
	MB-7285	Breast Invasive Ductal Carcinoma	0
	MB-7291	Breast Invasive Ductal Carcinoma	0
	MB-7292	Breast Invasive Ductal Carcinoma	0
	MB-7293	Breast Invasive Ductal Carcinoma	0
	MB-7296	Breast Invasive Ductal Carcinoma	0
	MB-0035	Breast Invasive Lobular Carcinoma	0
	MB-0112	Breast Invasive Lobular Carcinoma	0.041667
	MB-0145	Breast Invasive Lobular Carcinoma	0.018519
	MB-0147	Breast Invasive Lobular Carcinoma	0.025641
	MB-0169	Breast Invasive Lobular Carcinoma	0
	MB-0188	Breast Invasive Lobular Carcinoma	0
	MB-0222	Breast Invasive Lobular Carcinoma	0
	MB-0228	Breast Invasive Lobular Carcinoma	0.009259
	MB-0245	Breast Invasive Lobular Carcinoma	0
	MB-0279	Breast Invasive Lobular Carcinoma	0
	MB-0312	Breast Invasive Lobular Carcinoma	0
	MB-0342	Breast Invasive Lobular Carcinoma	0.025316
	MB-0369	Breast Invasive Lobular Carcinoma	0
	MB-0410	Breast Invasive Lobular Carcinoma	0
	MB-0427	Breast Invasive Lobular Carcinoma	0
	MB-0429	Breast Invasive Lobular Carcinoma	0
	MB-0431	Breast Invasive Lobular Carcinoma	0.011905
	MB-0444	Breast Invasive Lobular Carcinoma	0.061224
	MB-0521	Breast Invasive Lobular Carcinoma	0.012346
	MB-0605	Breast Invasive Lobular Carcinoma	0.007813
	MB-0621	Breast Invasive Lobular Carcinoma	0
	MB-0657	Breast Invasive Lobular Carcinoma	0
	MB-2556	Breast Invasive Lobular Carcinoma	0
	MB-2744	Breast Invasive Lobular Carcinoma	0.028571
	MB-2754	Breast Invasive Lobular Carcinoma	0.010204
	MB-2769	Breast Invasive Lobular Carcinoma	0
	MB-2840	Breast Invasive Lobular Carcinoma	0
	MB-2845	Breast Invasive Lobular Carcinoma	0
	MB-2854	Breast Invasive Lobular Carcinoma	0
	MB-3021	Breast Invasive Lobular Carcinoma	0.030769
	MB-3049	Breast Invasive Lobular Carcinoma	0
	MB-3085	Breast Invasive Lobular Carcinoma	0
	MB-3378	Breast Invasive Lobular Carcinoma	0
	MB-4033	Breast Invasive Lobular Carcinoma	0.005376
	MB-4289	Breast Invasive Lobular Carcinoma	0.006369
	MB-4698	Breast Invasive Lobular Carcinoma	0.047619
	MB-4708	Breast Invasive Lobular Carcinoma	0
	MB-4716	Breast Invasive Lobular Carcinoma	0.018779
	MB-4741	Breast Invasive Lobular Carcinoma	0.006944
	MB-4764	Breast Invasive Lobular Carcinoma	0
	MB-4797	Breast Invasive Lobular Carcinoma	0
	MB-4798	Breast Invasive Lobular Carcinoma	0.028169
	MB-4828	Breast Invasive Lobular Carcinoma	0
	MB-4853	Breast Invasive Lobular Carcinoma	0.015873
	MB-4872	Breast Invasive Lobular Carcinoma	0.014286
	MB-4876	Breast Invasive Lobular Carcinoma	0
	MB-4968	Breast Invasive Lobular Carcinoma	0.03125
	MB-4992	Breast Invasive Lobular Carcinoma	0
	MB-4998	Breast Invasive Lobular Carcinoma	0.013761
	MB-5110	Breast Invasive Lobular Carcinoma	0.006623
	MB-5147	Breast Invasive Lobular Carcinoma	0
	MB-5184	Breast Invasive Lobular Carcinoma	0
	MB-5191	Breast Invasive Lobular Carcinoma	0.029412
	MB-5298	Breast Invasive Lobular Carcinoma	0
	MB-5313	Breast Invasive Lobular Carcinoma	0
	MB-5327	Breast Invasive Lobular Carcinoma	0.04717
	MB-5366	Breast Invasive Lobular Carcinoma	0.028571
	MB-5493	Breast Invasive Lobular Carcinoma	0
	MB-5563	Breast Invasive Lobular Carcinoma	0
	MB-5592	Breast Invasive Lobular Carcinoma	0
	MB-5593	Breast Invasive Lobular Carcinoma	0
	MB-5596	Breast Invasive Lobular Carcinoma	0.018519
	MB-6007	Breast Invasive Lobular Carcinoma	0
	MB-6008	Breast Invasive Lobular Carcinoma	0
	MB-6012	Breast Invasive Lobular Carcinoma	0
	MB-6107	Breast Invasive Lobular Carcinoma	0
	MB-6133	Breast Invasive Lobular Carcinoma	0
	MB-6141	Breast Invasive Lobular Carcinoma	0
	MB-6147	Breast Invasive Lobular Carcinoma	0.006289
	MB-6167	Breast Invasive Lobular Carcinoma	0
	MB-6253	Breast Invasive Lobular Carcinoma	0
	MB-6283	Breast Invasive Lobular Carcinoma	0.016393
	MB-6319	Breast Invasive Lobular Carcinoma	0
	MB-7004	Breast Invasive Lobular Carcinoma	0.005525
	MB-7041	Breast Invasive Lobular Carcinoma	0
	MB-7054	Breast Invasive Lobular Carcinoma	0
	MB-7071	Breast Invasive Lobular Carcinoma	0
	MB-7173	Breast Invasive Lobular Carcinoma	0
	MB-7218	Breast Invasive Lobular Carcinoma	0
	MB-7273	Breast Invasive Lobular Carcinoma	0
	MB-7283	Breast Invasive Lobular Carcinoma	0.016129
	MB-0231	Breast Invasive Mixed Mucinous Carcinoma	0
	MB-0365	Breast Invasive Mixed Mucinous Carcinoma	0
	MB-0439	Breast Invasive Mixed Mucinous Carcinoma	0.005848
	MB-0471	Breast Invasive Mixed Mucinous Carcinoma	0.026316
	MB-0617	Breast Invasive Mixed Mucinous Carcinoma	0.009524
	MB-2853	Breast Invasive Mixed Mucinous Carcinoma	0.030303
	MB-5033	Breast Invasive Mixed Mucinous Carcinoma	0.009804
	MB-5230	Breast Invasive Mixed Mucinous Carcinoma	0
	MB-6254	Breast Invasive Mixed Mucinous Carcinoma	0
	MB-6314	Breast Invasive Mixed Mucinous Carcinoma	0.030303
	MB-6346	Breast Invasive Mixed Mucinous Carcinoma	0.017699
	MB-0050	Breast Mixed Ductal and Lobular Carcinoma	0
	MB-0124	Breast Mixed Ductal and Lobular Carcinoma	0.008264
	MB-0125	Breast Mixed Ductal and Lobular Carcinoma	0.016949
	MB-0133	Breast Mixed Ductal and Lobular Carcinoma	0.026316
	MB-0142	Breast Mixed Ductal and Lobular Carcinoma	0
	MB-0162	Breast Mixed Ductal and Lobular Carcinoma	0
	MB-0171	Breast Mixed Ductal and Lobular Carcinoma	0
	MB-0177	Breast Mixed Ductal and Lobular Carcinoma	0.016393
	MB-0192	Breast Mixed Ductal and Lobular Carcinoma	0
	MB-0199	Breast Mixed Ductal and Lobular Carcinoma	0
	MB-0215	Breast Mixed Ductal and Lobular Carcinoma	0
	MB-0229	Breast Mixed Ductal and Lobular Carcinoma	0
	MB-0234	Breast Mixed Ductal and Lobular Carcinoma	0
	MB-0239	Breast Mixed Ductal and Lobular Carcinoma	0
	MB-0263	Breast Mixed Ductal and Lobular Carcinoma	0
	MB-0266	Breast Mixed Ductal and Lobular Carcinoma	0
	MB-0319	Breast Mixed Ductal and Lobular Carcinoma	0.040541
	MB-0320	Breast Mixed Ductal and Lobular Carcinoma	0.032258
	MB-0363	Breast Mixed Ductal and Lobular Carcinoma	0.034483
	MB-0366	Breast Mixed Ductal and Lobular Carcinoma	0.02381
	MB-0394	Breast Mixed Ductal and Lobular Carcinoma	0
	MB-0437	Breast Mixed Ductal and Lobular Carcinoma	0
	MB-0485	Breast Mixed Ductal and Lobular Carcinoma	0
	MB-0492	Breast Mixed Ductal and Lobular Carcinoma	0
	MB-0583	Breast Mixed Ductal and Lobular Carcinoma	0
	MB-0589	Breast Mixed Ductal and Lobular Carcinoma	0.005814
	MB-0596	Breast Mixed Ductal and Lobular Carcinoma	0
	MB-0606	Breast Mixed Ductal and Lobular Carcinoma	0
	MB-0638	Breast Mixed Ductal and Lobular Carcinoma	0
	MB-0646	Breast Mixed Ductal and Lobular Carcinoma	0.009804
	MB-2536	Breast Mixed Ductal and Lobular Carcinoma	0
	MB-2610	Breast Mixed Ductal and Lobular Carcinoma	0
	MB-2616	Breast Mixed Ductal and Lobular Carcinoma	0
	MB-2708	Breast Mixed Ductal and Lobular Carcinoma	0
	MB-2712	Breast Mixed Ductal and Lobular Carcinoma	0
	MB-2718	Breast Mixed Ductal and Lobular Carcinoma	0.007937
	MB-2750	Breast Mixed Ductal and Lobular Carcinoma	0
	MB-2752	Breast Mixed Ductal and Lobular Carcinoma	0
	MB-2790	Breast Mixed Ductal and Lobular Carcinoma	0.007353
	MB-2796	Breast Mixed Ductal and Lobular Carcinoma	0.015625
	MB-2819	Breast Mixed Ductal and Lobular Carcinoma	0.040816
	MB-2851	Breast Mixed Ductal and Lobular Carcinoma	0
	MB-2963	Breast Mixed Ductal and Lobular Carcinoma	0.028169
	MB-2990	Breast Mixed Ductal and Lobular Carcinoma	0.014493
	MB-3008	Breast Mixed Ductal and Lobular Carcinoma	0
	MB-3037	Breast Mixed Ductal and Lobular Carcinoma	0
	MB-3064	Breast Mixed Ductal and Lobular Carcinoma	0
	MB-3079	Breast Mixed Ductal and Lobular Carcinoma	0
	MB-3228	Breast Mixed Ductal and Lobular Carcinoma	0.006061
	MB-3266	Breast Mixed Ductal and Lobular Carcinoma	0.018018
	MB-3357	Breast Mixed Ductal and Lobular Carcinoma	0
	MB-3417	Breast Mixed Ductal and Lobular Carcinoma	0.013793
	MB-3467	Breast Mixed Ductal and Lobular Carcinoma	0
	MB-3576	Breast Mixed Ductal and Lobular Carcinoma	0.021739
	MB-3781	Breast Mixed Ductal and Lobular Carcinoma	0
	MB-3850	Breast Mixed Ductal and Lobular Carcinoma	0.014286
	MB-3854	Breast Mixed Ductal and Lobular Carcinoma	0
	MB-4018	Breast Mixed Ductal and Lobular Carcinoma	0
	MB-4046	Breast Mixed Ductal and Lobular Carcinoma	0.032258
	MB-4171	Breast Mixed Ductal and Lobular Carcinoma	0
	MB-4293	Breast Mixed Ductal and Lobular Carcinoma	0
	MB-4306	Breast Mixed Ductal and Lobular Carcinoma	0
	MB-4313	Breast Mixed Ductal and Lobular Carcinoma	0
	MB-4343	Breast Mixed Ductal and Lobular Carcinoma	0
	MB-4484	Breast Mixed Ductal and Lobular Carcinoma	0
	MB-4557	Breast Mixed Ductal and Lobular Carcinoma	0.011429
	MB-4618	Breast Mixed Ductal and Lobular Carcinoma	0
	MB-4627	Breast Mixed Ductal and Lobular Carcinoma	0
	MB-4633	Breast Mixed Ductal and Lobular Carcinoma	0.011538
	MB-4704	Breast Mixed Ductal and Lobular Carcinoma	0
	MB-4730	Breast Mixed Ductal and Lobular Carcinoma	0
	MB-4738	Breast Mixed Ductal and Lobular Carcinoma	0
	MB-4739	Breast Mixed Ductal and Lobular Carcinoma	0.009524
	MB-4742	Breast Mixed Ductal and Lobular Carcinoma	0.007407
	MB-4743	Breast Mixed Ductal and Lobular Carcinoma	0
	MB-4749	Breast Mixed Ductal and Lobular Carcinoma	0.015873
	MB-4818	Breast Mixed Ductal and Lobular Carcinoma	0.012987
	MB-4897	Breast Mixed Ductal and Lobular Carcinoma	0
	MB-4957	Breast Mixed Ductal and Lobular Carcinoma	0
	MB-4965	Breast Mixed Ductal and Lobular Carcinoma	0.023256
	MB-4966	Breast Mixed Ductal and Lobular Carcinoma	0.028409
	MB-4981	Breast Mixed Ductal and Lobular Carcinoma	0.013793
	MB-5011	Breast Mixed Ductal and Lobular Carcinoma	0
	MB-5022	Breast Mixed Ductal and Lobular Carcinoma	0
	MB-5027	Breast Mixed Ductal and Lobular Carcinoma	0
	MB-5049	Breast Mixed Ductal and Lobular Carcinoma	0
	MB-5050	Breast Mixed Ductal and Lobular Carcinoma	0.02381
	MB-5059	Breast Mixed Ductal and Lobular Carcinoma	0.025126
	MB-5122	Breast Mixed Ductal and Lobular Carcinoma	0
	MB-5182	Breast Mixed Ductal and Lobular Carcinoma	0.011834
	MB-5239	Breast Mixed Ductal and Lobular Carcinoma	0
	MB-5270	Breast Mixed Ductal and Lobular Carcinoma	0
	MB-5284	Breast Mixed Ductal and Lobular Carcinoma	0
	MB-5293	Breast Mixed Ductal and Lobular Carcinoma	0.111111
	MB-5322	Breast Mixed Ductal and Lobular Carcinoma	0
	MB-5350	Breast Mixed Ductal and Lobular Carcinoma	0
	MB-5358	Breast Mixed Ductal and Lobular Carcinoma	0
	MB-5428	Breast Mixed Ductal and Lobular Carcinoma	0
	MB-5533	Breast Mixed Ductal and Lobular Carcinoma	0.028369
	MB-5567	Breast Mixed Ductal and Lobular Carcinoma	0
	MB-5588	Breast Mixed Ductal and Lobular Carcinoma	0
	MB-5646	Breast Mixed Ductal and Lobular Carcinoma	0.007634
	MB-5651	Breast Mixed Ductal and Lobular Carcinoma	0.093023
	MB-6092	Breast Mixed Ductal and Lobular Carcinoma	0
	MB-6103	Breast Mixed Ductal and Lobular Carcinoma	0.030303
	MB-6105	Breast Mixed Ductal and Lobular Carcinoma	0
	MB-6145	Breast Mixed Ductal and Lobular Carcinoma	0.012821
	MB-6163	Breast Mixed Ductal and Lobular Carcinoma	0.013333
	MB-6168	Breast Mixed Ductal and Lobular Carcinoma	0.006173
	MB-6179	Breast Mixed Ductal and Lobular Carcinoma	0
	MB-6185	Breast Mixed Ductal and Lobular Carcinoma	0
	MB-6226	Breast Mixed Ductal and Lobular Carcinoma	0
	MB-6233	Breast Mixed Ductal and Lobular Carcinoma	0.030769
	MB-6234	Breast Mixed Ductal and Lobular Carcinoma	0
	MB-6238	Breast Mixed Ductal and Lobular Carcinoma	0
	MB-6239	Breast Mixed Ductal and Lobular Carcinoma	0.015873
	MB-6322	Breast Mixed Ductal and Lobular Carcinoma	0.051724
	MB-7014	Breast Mixed Ductal and Lobular Carcinoma	0
	MB-7039	Breast Mixed Ductal and Lobular Carcinoma	0.007407
	MB-7072	Breast Mixed Ductal and Lobular Carcinoma	0
	MB-7075	Breast Mixed Ductal and Lobular Carcinoma	0
	MB-7086	Breast Mixed Ductal and Lobular Carcinoma	0
	MB-7092	Breast Mixed Ductal and Lobular Carcinoma	0.017857
	MB-7102	Breast Mixed Ductal and Lobular Carcinoma	0
	MB-7229	Breast Mixed Ductal and Lobular Carcinoma	0
	MB-0328	Invasive Breast Carcinoma	0
	MB-0341	Invasive Breast Carcinoma	0.034483
	MB-0514	Invasive Breast Carcinoma	0
	MB-5176	Invasive Breast Carcinoma	0.011236
	MB-5190	Invasive Breast Carcinoma	0
	MB-7032	Invasive Breast Carcinoma	0.022222
	MB-7084	Invasive Breast Carcinoma	0
	MB-7236	Invasive Breast Carcinoma	0.014815
B	DepMap ID	ADH5_4_100009939_100010939 Methylation Fraction Methylation (1kb upstream TSS)	filter	Cell Line Name	Primary Disease	Lineage	all Tumor Type
	ACH-000691	0.04225	Breast	HCC2157	Invasive Breast Carcinoma	Breast	Primary
	ACH-000258	0	Breast	DU4475	Invasive Breast Carcinoma	Breast	Metastatic
	ACH-000759	0	Breast	MDAMB175VII	Invasive Breast Carcinoma	Breast	Metastatic
	ACH-000147	0	Breast	T47D	Invasive Breast Carcinoma	Breast	Metastatic
	ACH-000028	0.0071	Breast	KPL1	Invasive Breast Carcinoma	Breast	Metastatic
	ACH-000768	0.0106	Breast	MDAMB231	Invasive Breast Carcinoma	Breast	Metastatic
	ACH-000755	0	Breast	HCC2218	Breast Ductal Carcinoma In Situ	Breast	Primary
	ACH-000859	0.08828	Breast	HCC1954	Breast Ductal Carcinoma In Situ	Breast	Primary
	ACH-000783	0	Breast	CAMA1	Invasive Breast Carcinoma	Breast	Metastatic
	ACH-000721	0	Breast	HMC18	Invasive Breast Carcinoma	Breast	Metastatic
	ACH-000248	0	Breast	AU565	Invasive Breast Carcinoma	Breast	Metastatic
	ACH-000148	0.01449	Breast	HS578T	Invasive Breast Carcinoma	Breast	Primary
	ACH-000536	0	Breast	BT20	Invasive Breast Carcinoma	Breast	Primary
	ACH-000934	0	Breast	MDAMB361	Invasive Breast Carcinoma	Breast	Metastatic
	ACH-000573	0	Breast	MDAMB436	Invasive Breast Carcinoma	Breast	Metastatic
	ACH-000017	0	Breast	SKBR3	Invasive Breast Carcinoma	Breast	Metastatic
	ACH-000374	0	Breast	HCC1143	Invasive Breast Carcinoma	Breast	Primary
	ACH-000223	0	Breast	HCC1937	Invasive Breast Carcinoma	Breast	Primary
	ACH-000930	0	Breast	HCC1569	Invasive Breast Carcinoma	Breast	Primary
	ACH-000699	0.0104	Breast	HCC1395	Invasive Breast Carcinoma	Breast	Primary
	ACH-000111	0	Breast	HCC1187	Invasive Breast Carcinoma	Breast	Primary
	ACH-000097	0.01638	Breast	ZR751	Invasive Breast Carcinoma	Breast	Metastatic
	ACH-000668	0	Breast	HCC70	Invasive Breast Carcinoma	Breast	Primary
	ACH-000019	0.00763	Breast	MCF7	Invasive Breast Carcinoma	Breast	Metastatic
	ACH-000725	0	Breast	HCC202	Breast Ductal Carcinoma In Situ	Breast	Primary
	ACH-000621	0	Breast	MDAMB157	Invasive Breast Carcinoma	Breast	Metastatic
	ACH-000117	0	Breast	EFM192A	Invasive Breast Carcinoma	Breast	Metastatic
	ACH-000330	0	Breast	EFM19	Invasive Breast Carcinoma	Breast	Metastatic
	ACH-000927	0	Breast	BT474	Invasive Breast Carcinoma	Breast	Primary
	ACH-000876	0.05314	Breast	MDAMB415	Invasive Breast Carcinoma	Breast	Metastatic
	ACH-000849	0	Breast	MDAMB468	Invasive Breast Carcinoma	Breast	Metastatic
	ACH-000288	0	Breast	BT549	Invasive Breast Carcinoma	Breast	Primary
	ACH-000857	0	Breast	CAL851	Invasive Breast Carcinoma	Breast	Primary
	ACH-000624	0.00417	Breast	HCC1806	Breast Ductal Carcinoma In Situ	Breast	Primary
	ACH-000568	0	Breast	UACC812	Invasive Breast Carcinoma	Breast	Primary
	ACH-000044	0.00613	Breast	MDAMB134VI	Invasive Breast Carcinoma	Breast	Metastatic
	ACH-000349	0	Breast	HCC1500	Breast Ductal Carcinoma In Situ	Breast	Primary
	ACH-000196	0	Breast	HCC1599	Invasive Breast Carcinoma	Breast	Primary
	ACH-000554	0	Breast	UACC893	Invasive Breast Carcinoma	Breast	Primary
	ACH-000643	0	Breast	HDQP1	Invasive Breast Carcinoma	Breast	Primary
	ACH-000277	0.0186	Breast	HCC1419	Invasive Breast Carcinoma	Breast	Primary
	ACH-000818	0	Breast	BT483	Invasive Breast Carcinoma	Breast	Primary
	ACH-000352	0	Breast	HCC1428	Invasive Breast Carcinoma	Breast	Metastatic
	ACH-000828	0	Breast	ZR7530	Invasive Breast Carcinoma	Breast	Metastatic
	ACH-000856	0	Breast	CAL51	Invasive Breast Carcinoma	Breast	Metastatic
	ACH-000212	0.04534	Breast	CAL120	Invasive Breast Carcinoma	Breast	Metastatic

## Sheet: FigureS4
A
	mock	(+)GSNOR							Paired t test
CDH1/vinculin	1	1.26741							P value	0.032
	1	1.10917							P value summary	*
	1	1.05704							Significantly different (P < 0.05)?	Yes
	1	1.52185							One- or two-tailed P value?	Two-tailed
	1	1.05276							t, df	t=2,947, df=5
	1	1.34221							Number of pairs	6
	mock	(+)GSNOR
SNAi1/vinc	1	0.338294							Paired t test
	1	0.36515							P value	0.0009
	1	0.899431							P value summary	***
	1	0.701945							Significantly different (P < 0.05)?	Yes
	1	0.428472							One- or two-tailed P value?	Two-tailed
	1	0.342001							t, df	t=6,113, df=6
	1	0.392457							Number of pairs	7
	mock	(+)GSNOR
GSNOR/vinc	1	1.6817							Paired t test
	1	1.48261							P value	0.0028
	1	2.00391							P value summary	**
	1	1.53891							Significantly different (P < 0.05)?	Yes
	1	1.36623							One- or two-tailed P value?	Two-tailed
	1	1.30452							t, df	t=4,487, df=7
	1	1.48484							Number of pairs	8
	1	0.958228
B
									Paired t test
MDA-MB-231									P value	<0,0001
	mock	(+)GSNOR							P value summary	****
GSNOR	0.984928	111.306							Significantly different (P < 0.05)?	Yes
	1.00307	112.953							One- or two-tailed P value?	Two-tailed
	1.0122	115.14							t, df	t=101,7, df=2
									Number of pairs	3
	mock	(+)GSNOR							Paired t test
CDH1	0.992666	1.14508							P value	0.0011
	0.987682	1.15341							P value summary	**
	1.01995	1.19018							Significantly different (P < 0.05)?	Yes
									One- or two-tailed P value?	Two-tailed
									t, df	t=30,43, df=2
									Number of pairs	3
T47D									Paired t test
	mock	(+)GSNOR							P value	0.0002
GSNOR	0.964533	17.1804							P value summary	***
	1.00499	18.0837							Significantly different (P < 0.05)?	Yes
	1.03163	17.6756							One- or two-tailed P value?	Two-tailed
									t, df	t=66,82, df=2
									Number of pairs	3
CDH1	0.981875	1.65642							Paired t test
	0.975915	1.72271							P value	0.0009
	1.04359	1.77119							P value summary	***
									Significantly different (P < 0.05)?	Yes
									One- or two-tailed P value?	Two-tailed
									t, df	t=33,15, df=2
									Number of pairs	3
ZN751									Paired t test
	mock	(+)GSNOR							P value	<0,0001
GSNOR	1.00387	8.02774							P value summary	****
	1.01738	8.14922							Significantly different (P < 0.05)?	Yes
	0.979123	8.04346							One- or two-tailed P value?	Two-tailed
									t, df	t=224,6, df=2
									Number of pairs	3
CDH1	0.991851	1.54198							Paired t test
	1.01832	1.58532							P value	0.0005
	0.990076	1.58334							P value summary	***
									Significantly different (P < 0.05)?	Yes
									One- or two-tailed P value?	Two-tailed
									t, df	t=45,42, df=2
									Number of pairs	3
HCC38									Paired t test
	mock	(+)GSNOR							P value	<0,0001
GSNOR	0.980512	18.6003							P value summary	****
	1.03479	18.5856							Significantly different (P < 0.05)?	Yes
	0.985592	18.1228							One- or two-tailed P value?	Two-tailed
									t, df	t=115,7, df=2
									Number of pairs	3
									Paired t test
CDH1	1.03781	2.16314							P value	0.0004
	1.00315	2.19705							P value summary	***
	0.960541	2.1655							Significantly different (P < 0.05)?	Yes
									One- or two-tailed P value?	Two-tailed
									t, df	t=47,17, df=2
									Number of pairs	3
