# Supplementary material for: Post-transcriptional repression of GSNOR by microRNAs regulates S-nitrosylation and fuels breast cancer progression
Source: Research Square preprint supplement (doi:10.21203/rs.3.rs-8532436/v1), 2026-01-21
Supplement: Supplementary file 2 [file e6cc66a99ef10938b70b4cc6.xlsx]

## Sheet: GO-BP GSNOR.KOvsWT
__mclCluster	Cluster Name	EnrichmentMap::-log10(pvalue) (GO:BP-KO)	EnrichmentMap::-log10(pvalue)*sign(NES) (GO:BP-KO)	EnrichmentMap::-log10(pvalue)_max	EnrichmentMap::ES (GO:BP-KO)	EnrichmentMap::fdr_qvalue (GO:BP-KO)	EnrichmentMap::Genes	EnrichmentMap::gs_size	EnrichmentMap::Name	EnrichmentMap::NES (GO:BP-KO)	EnrichmentMap::pvalue (GO:BP-KO)	name	Name_Clean	Cluster Name
11	Actin-Based Movement & Muscle Function	4	4	4	0.5374	0.0003	PLN|QKI|FLNA|ABCC9|ACTA2|ACTC1|ACTN4|ADCY10|AKAP9|ANK2|ATP1A1|ATP2A1|ATP2A2|BIN1|C10ORF71|CACNA1C|CACNA1D|CACNA1G|CACNA2D1|CACNB2|CAMK2D|CASQ2|CAV1|CAV3|CCDC88C|CTNNA3|DLG1|DSC2|DSG2|DSP|EMP2|EPB41L5|EPDR1|FGF12|FGF13|FNBP1L|FRMD6|GATA4|GJA5|GJC1|GPD1L|GSN|HCN4|JUP|KCNA5|KCND3|KCNE1|KCNE2|KCNE3|KCNE4|KCNE5|KCNH2|KCNJ2|KCNJ3|KCNJ5|KCNN2|LIMCH1|LUZP1|MIR1-1|MIR133A1|MIR328|MIR448|MYBPC3|MYH10|MYH14…	146	GOBP_ACTIN_FILAMENT_BASED_MOVEMENT	2.0387	0	GOBP_ACTIN_FILAMENT_BASED_MOVEMENT	ACTIN FILAMENT BASED MOVEMENT	Actin-Based Movement & Muscle Function
11	Actin-Based Movement & Muscle Function	3.69897	3.69897	3.69897	0.5153	0.0065	PLN|QKI|FLNA|ABCC9|ACTA2|ACTC1|ADCY10|AKAP9|ANK2|ATP1A1|ATP2A1|ATP2A2|BIN1|C10ORF71|CACNA1C|CACNA1D|CACNA1G|CACNA2D1|CACNB2|CAMK2D|CASQ2|CAV1|CAV3|CCDC88C|CTNNA3|DLG1|DSC2|DSG2|DSP|EMP2|EPB41L5|EPDR1|FGF12|FGF13|FRMD6|GATA4|GJA5|GJC1|GPD1L|GSN|HCN4|JUP|KCNA5|KCND3|KCNE1|KCNE2|KCNE3|KCNE4|KCNE5|KCNH2|KCNJ2|KCNJ3|KCNJ5|KCNN2|LIMCH1|LUZP1|MIR1-1|MIR133A1|MIR328|MIR448|MYBPC3|MYH2|MYH3|MYH4|MYH6|MYH7…	123	GOBP_ACTIN_MEDIATED_CELL_CONTRACTION	1.8758	0.0002	GOBP_ACTIN_MEDIATED_CELL_CONTRACTION	ACTIN MEDIATED CELL CONTRACTION	Actin-Based Movement & Muscle Function
11	Actin-Based Movement & Muscle Function	2.63827	2.63827	2.63827	0.4362	0.0303	TNNI1|ACTN3|IGF1|ROCK2|MIR25|PPP3CA|STUB1|YY1|GLRX3|MYMK|MYOG|AGT|IL1B|ATP2B4|ERRFI1|SMAD3|EZH2|SMAD4|TOMM70|TRPC3|MIR208B|MIR19B1|PPARG|MSTN|ARRB1|MEF2A|NPPA|ASB2|ARRB2|FOXO3|MIR145|MIR20A|BECN1|MIR21|MIR214|HDAC4|BMP10|KDM4A|GATA5|GATA6|MTPN|IGFBP5|P2RX4|PRKAG3|SELENON|PARP2|TNNT1|CASQ1|TRIM63|ADCY10|MIR17|MYOC|GSK3A|MIR19A|MIR499A|ATP2A2|NOS3|MYOZ1|MYOZ2|HEY2|TNFRSF1A|CAMK2D|IL1R1|TWF1|HMOX1|C…	126	GOBP_MUSCLE_ADAPTATION	1.6351	0.0023	GOBP_MUSCLE_ADAPTATION	MUSCLE ADAPTATION	Actin-Based Movement & Muscle Function
11	Actin-Based Movement & Muscle Function	2.79588	2.79588	2.79588	0.3141	0.0256	TNNI1|ROCK2|DOCK5|EDN3|TRPV1|COL6A1|SETD3|EDN2|ACE2|HTR2B|KCNIP1|STUB1|YY1|GLRX3|ITGA2|ERRFI1|SMAD3|EZH2|SMAD4|MYOF|ZC3H12A|MIR15B|MIR19B1|SRF|PPARG|MSTN|TACR1|MAP2K1|GATA5|GATA6|TMOD1|TMOD2|TMOD3|TMOD4|ADRA2B|ADRA2C|ZDHHC21|TPCN2|TNNT1|UTS2|TNNT3|TPM2|TPM3|TPM4|DOCK4|BBS2|HEY2|TRPV4|CHRNA3|TWF1|ARG2|CHRNB1|HMOX1|TACR2|HSBP1|FKRP|GDNF|HDAC2|ACACB|ADRA1A|HOMER1|AKAP6|ATP1B1|HTR2A|CERS1|INPP5F|CALM…	479	GOBP_MUSCLE_SYSTEM_PROCESS	1.4338	0.0016	GOBP_MUSCLE_SYSTEM_PROCESS	MUSCLE SYSTEM PROCESS	Actin-Based Movement & Muscle Function
11	Actin-Based Movement & Muscle Function	3.30103	3.30103	3.30103	0.679	0.0117	CTNNA3|DLG1|DSC2|DSG2|DSP|PDE4B|PDE4D|PDPN|FGF13|PKP2|RANGRF|ADORA1|GATA4|GJA5|RYR2|ATP1A2|HCN4|JUP|SCN5A|KCNJ2|SRI|STC1|STRIT1|MIR448|SUMO1|MYBPC3|TNNC1|ACTA2|PLN|TRPM4|MYH7B|ADCY10|AKAP9|ANK2|ATP2A1|ATP2A2|ZEB2|BIN1|MYLK2|CACNA1C|CAMK2D|CAV1|CAV3	43	GOBP_REGULATION_OF_ACTIN_FILAMENT_BASED_MOVEMENT	1.9632	0.0005	GOBP_REGULATION_OF_ACTIN_FILAMENT_BASED_MOVEMENT	REGULATION OF ACTIN FILAMENT BASED MOVEMENT	Actin-Based Movement & Muscle Function
11	Actin-Based Movement & Muscle Function	2.37675	2.37675	2.37675	0.4756	0.0442	TNNI1|ACTN3|IGF1|ROCK2|MIR25|PPP3CA|STUB1|YY1|GLRX3|MYMK|MYOG|AGT|ATP2B4|ERRFI1|SMAD3|SMAD4|TOMM70|TRPC3|MIR208B|MIR19B1|PPARG|ARRB1|MEF2A|ARRB2|FOXO3|MIR145|MIR20A|BECN1|MIR21|MIR214|HDAC4|BMP10|GATA5|MTPN|IGFBP5|P2RX4|PRKAG3|SELENON|PARP2|TNNT1|CASQ1|TRIM63|ADCY10|MIR17|GSK3A|MIR19A|MIR499A|ATP2A2|NOS3|TNFRSF1A|CAMK2D|TWF1|CAV3|CAMK2B|FBXO32|MIR17HG|CAMK2G|PRKCA|ACACB|ADRA1A|LMNA|PAK1|AKAP6|CER…	99	GOBP_REGULATION_OF_MUSCLE_ADAPTATION	1.7019	0.0042	GOBP_REGULATION_OF_MUSCLE_ADAPTATION	REGULATION OF MUSCLE ADAPTATION	Actin-Based Movement & Muscle Function
11	Actin-Based Movement & Muscle Function	3.04576	3.04576	3.04576	0.3826	0.0174	TNNI1|ACTN3|ROCK2|DOCK5|EDN3|MIR25|HSP90AA1|ADRA2A|SETD3|EDN2|ACE2|STUB1|YY1|GLRX3|ITGA2|AGT|ERRFI1|SMAD3|ATP2B1|SMAD4|TACR3|GRK2|ZC3H12A|MIR19B1|SRF|PPARG|TMEM38B|MSTN|ARRB1|TACR1|FOXO3|BMP10|MAP2K1|GATA5|ADRA2B|ADRA2C|DMPK|ZDHHC21|TNNT1|TNNT3|CASQ1|MIR17|DOCK4|MIR19A|MIR499A|MIR200C|NOS3|TRPV4|CHRNA3|TWF1|TACR2|ENO1|ADRB2|CNN1|ACACB|ADRA1A|AKAP6|ATP1B1|CERS1|NR4A3|CALM1|F2R|CALM3|ABAT|PARP1|CHR…	262	GOBP_REGULATION_OF_MUSCLE_SYSTEM_PROCESS	1.6138	0.0009	GOBP_REGULATION_OF_MUSCLE_SYSTEM_PROCESS	REGULATION OF MUSCLE SYSTEM PROCESS	Actin-Based Movement & Muscle Function
11	Actin-Based Movement & Muscle Function	4	4	4	0.3577	0.0009	DICER1|TNNI1|ROCK2|DOCK5|EDN3|S1PR2|SETD3|EDN2|ACE2|HBEGF|SHANK1|SHANK3|KCNIP1|STUB1|EIF2AK3|YY1|GLRX3|ISL1|ITGA2|ITGA4|ERRFI1|SMAD3|SMAD4|FTO|CYP8B1|ZC3H12A|NPVF|SPTBN4|SRC|MIR19B1|SRF|PPARG|CRY1|SSH1|MMP2|MSTN|FIG4|ABCG5|ABCG8|PTPN11|QKI|TAC1|APOA4|TACR1|APOE|RNF10|TGFB2|CRH|MAP2K1|GATA5|TSPO|ADRA2B|ADRA2C|TMEM25|ZDHHC21|TSHZ3|SOX10|TNNT1|LPCAT3|TNNT3|ZMYND8|PRAP1|DOCK4|CARTPT|HEY2|TRPV4|CHRNA3…	594	GOBP_REGULATION_OF_SYSTEM_PROCESS	1.6608	0	GOBP_REGULATION_OF_SYSTEM_PROCESS	REGULATION OF SYSTEM PROCESS	Actin-Based Movement & Muscle Function
11	Actin-Based Movement & Muscle Function	4	4	4	0.714	0.0009	CAMK2B|TNNI1|ACTN3|MIR25|CFLAR|GSN|CAMK2G|KLF15|PPP3CA|ACACB|LMNA|INPP5F|MYMK|MYOG|ATP2B4|ERRFI1|SMAD3|EZH2|SMAD4|TRPC3|MYH6|FOXO1|MYH7|CAMTA2|GTF2IRD1|MIR208B|MLIP|CACNA1S|PPARG|MSTN|MYOD1|APLNR|NPPA|ASB2|MIR20A|MIR214|HDAC4|BMP10|KDM4A|GATA6|MIR208A|IGFBP5|MIR199A1|TCAP|TNNC1|TNNT1|TRIM63|MIR17|MYOC|MIR499A|ATP2A2|MIR34B|MYOZ1|MIR34C|MYOZ2|HEY2	56	GOBP_STRIATED_MUSCLE_ADAPTATION	2.1664	0	GOBP_STRIATED_MUSCLE_ADAPTATION	STRIATED MUSCLE ADAPTATION	Actin-Based Movement & Muscle Function
3	Actin-diven cytoskeletal remodelling	2.88606	2.88606	2.88606	0.375	0.0217	ACTG1|FSCN2|FSCN3|ACTN1|ROCK2|ADD1|S100A10|ADD2|S1PR1|GPR65|SDC4|AIF1L|SERPINF2|ALMS1|SFRP1|AMOT|HSP90B1|INPP5K|SHANK1|SHANK3|SHROOM1|SHROOM2|APOA1|ITGB1BP1|ITGB5|ARAP1|SMAD3|SORBS1|SORBS3|KCTD13|SPIRE1|ARHGAP28|SPIRE2|ARHGAP6|ARHGEF10|ARHGEF10L|ARHGEF15|SRC|LIMA1|SRF|ARHGEF18|LIMD2|LIMK1|ARHGEF5|STMN1|LPAR1|SWAP70|SYNPO|ARRB1|SYNPO2|ASAP3|MET|SYNPO2L|MICAL1|TAC1|TACR1|TACSTD2|BAG4|MIR138-1|BBS4|…	174	GOBP_ACTIN_FILAMENT_BUNDLE_ORGANIZATION	1.5694	0.0013	GOBP_ACTIN_FILAMENT_BUNDLE_ORGANIZATION	ACTIN FILAMENT BUNDLE ORGANIZATION	Actin-diven cytoskeletal remodelling
3	Actin-diven cytoskeletal remodelling	2.95861	2.95861	2.95861	0.5407	0.0194	VILL|ACTN2|CFL1|ADD1|CFL2|ADD2|ADD3|WASHC2C|SCIN|WDR1|SEMA5A|GSN|SH3BP1|CRACD|PDXP|SPECC1L|SPTA1|SPTAN1|SPTB|SPTBN1|SPTBN2|SPTBN4|SPTBN5|LIMA1|DMTN|LMOD1|DSTN|LMOD2|PLEK|LMOD3|PLEKHH2|SVIL|SWAP70|ASB2|MICAL1|PIK3CA|MICAL2|MICAL3|AVIL|PPP1R9B|F2RL1|MTPN|TMOD1|TMOD2|TMOD3|EPS8|TMOD4|CAPG|CAPZA1|CAPZA2|CAPZA3|CAPZB|CARMIL1|RDX|CARMIL2|VIL1|FLII|TRIOBP|TWF1|TWF2	60	GOBP_ACTIN_FILAMENT_DEPOLYMERIZATION	1.8276	0.0011	GOBP_ACTIN_FILAMENT_DEPOLYMERIZATION	ACTIN FILAMENT DEPOLYMERIZATION	Actin-diven cytoskeletal remodelling
3	Actin-diven cytoskeletal remodelling	4	4	4	0.3346	0.0021	RND1|RND2|RND3|RNH1|ROCK2|RUFY3|S100A10|S1PR1|SAMD14|SCIN|SDC4|SEMA5A|SERPINF2|SFRP1|SH3BP1|SH3D21|SH3KBP1|SHANK1|SHANK3|SHROOM1|SHROOM2|SHROOM3|SHROOM4|SLIT2|SMAD3|SNX9|SORBS1|SORBS3|SPATC1L|SPECC1L|SPIRE1|SPIRE2|SPTA1|SPTAN1|SPTB|SPTBN1|SPTBN2|SPTBN4|SPTBN5|SRC|SRF|SSH1|SSH2|SSH3|STMN1|SVIL|SWAP70|SYNPO|SYNPO2|SYNPO2L|TAC1|TACR1|TACSTD2|TAGLN2|TAGLN3|TENM1|TESK1|TGFB3|TGFBR1|TJP1|TLE6|TMEFF2|TM…	467	GOBP_ACTIN_FILAMENT_ORGANIZATION	1.5883	0	GOBP_ACTIN_FILAMENT_ORGANIZATION	ACTIN FILAMENT ORGANIZATION	Actin-diven cytoskeletal remodelling
3	Actin-diven cytoskeletal remodelling	2.56864	2.56864	2.56864	0.3722	0.0333	ACTN2|GBA2|GHSR|ADD1|ADD2|ADD3|GRB2|SCIN|HAX1|HCK|HCLS1|SEMA5A|ALOX15|INF2|SH3BP1|ANG|JAK2|SLIT2|ARF6|KANK1|ARFGEF1|KANK2|KANK3|SNX9|KANK4|SPATC1L|ARHGAP18|SPECC1L|ARHGAP28|KIRREL1|ARHGAP35|SPTA1|ARHGAP40|SPTAN1|SPTB|ARHGAP6|SPTBN1|SPTBN2|SPTBN4|SPTBN5|LATS1|LIMA1|SSH1|SSH2|SSH3|LMOD1|LMOD2|ARPC2|LMOD3|ARPC3|ARPC4|SVIL|ARPC5|SWAP70|ARPC5L|ASB2|MICAL1|MICAL2|MICAL3|MICALL2|AVIL|BAG4|BBS4|TENM1|MIR…	187	GOBP_ACTIN_POLYMERIZATION_OR_DEPOLYMERIZATION	1.5612	0.0027	GOBP_ACTIN_POLYMERIZATION_OR_DEPOLYMERIZATION	ACTIN POLYMERIZATION OR DEPOLYMERIZATION	Actin-diven cytoskeletal remodelling
3	Actin-diven cytoskeletal remodelling	2.67778	2.67778	2.67778	0.3537	0.0292	ACTG1|ACTN2|ROCK2|RTKN|S100A10|S1PR1|ADPRHL1|SDC4|AKAP13|ALKBH4|SERPINF2|ALMS1|SFRP1|AMOT|ANKRD1|ANKRD23|ANLN|APOA1|ARAP1|SIX4|SMAD3|SMAD4|SORBS1|SORBS3|ARHGAP28|ARHGAP6|ARHGEF10|ARHGEF10L|ARHGEF15|SRC|SRF|ARHGEF18|ARHGEF5|STMN1|SYNPO|ARRB1|ASAP3|SYNPO2L|TAC1|TACR1|TACSTD2|BAG4|BBS4|TESK1|TGFB3|BMP10|TGFBR1|BRAF|TJP1|TMEFF2|TMOD1|TMOD2|TMOD3|TMOD4|CAPN3|TNFAIP1|CARMIL1|TNNT1|TNNT3|CASQ1|CCDC88A|C…	216	GOBP_ACTOMYOSIN_STRUCTURE_ORGANIZATION	1.5075	0.0021	GOBP_ACTOMYOSIN_STRUCTURE_ORGANIZATION	ACTOMYOSIN STRUCTURE ORGANIZATION	Actin-diven cytoskeletal remodelling
3	Actin-diven cytoskeletal remodelling	2.95861	2.95861	2.95861	0.5863	0.0194	LMOD2|LMOD3|VILL|PLEKHH2|SVIL|SWAP70|CFL1|ADD1|ADD2|ADD3|ASB2|PIK3CA|WASHC2C|SCIN|AVIL|GSN|CRACD|MTPN|TMOD1|TMOD2|TMOD3|EPS8|TMOD4|CAPG|CAPZA1|CAPZA2|CAPZA3|CAPZB|CARMIL1|RDX|CARMIL2|SPECC1L|VIL1|SPTA1|SPTAN1|SPTB|FLII|SPTBN1|TRIOBP|SPTBN2|SPTBN4|SPTBN5|LIMA1|DMTN|TWF1|TWF2|LMOD1	47	GOBP_NEGATIVE_REGULATION_OF_ACTIN_FILAMENT_DEPOLYMERIZATION	1.829	0.0011	GOBP_NEGATIVE_REGULATION_OF_ACTIN_FILAMENT_DEPOLYMERIZATION	NEGATIVE REGULATION OF ACTIN FILAMENT DEPOLYMERIZATION	Actin-diven cytoskeletal remodelling
3	Actin-diven cytoskeletal remodelling	2.69897	2.69897	2.69897	0.5377	0.0283	VILL|CFL1|ADD1|ADD2|ADD3|WASHC2C|SCIN|GSN|CRACD|SLIT2|KANK1|ARFGEF1|KANK2|KANK3|KANK4|PFN1|CYRIB|PFN2|SPTA1|SPTAN1|HIP1R|SPTB|SPTBN1|SPTBN2|SPTBN4|SPTBN5|DMTN|SSH1|SSH2|SSH3|LMOD1|LMOD2|LMOD3|SVIL|ASB2|AVIL|BBS4|MIR214|PRKCD|MKKS|MTPN|TMOD1|MYADM|TMOD2|TMOD3|EPS8|TMOD4|CAPG|CAPZA1|CAPZA2|TMSB4X|CAPZA3|CAPZB|CARMIL1|RDX|CARMIL2|VIL1|FLII|TRIOBP|TWF1|TWF2	61	GOBP_NEGATIVE_REGULATION_OF_ACTIN_FILAMENT_POLYMERIZATION	1.8091	0.002	GOBP_NEGATIVE_REGULATION_OF_ACTIN_FILAMENT_POLYMERIZATION	NEGATIVE REGULATION OF ACTIN FILAMENT POLYMERIZATION	Actin-diven cytoskeletal remodelling
3	Actin-diven cytoskeletal remodelling	2.31876	2.31876	2.31876	0.4298	0.0488	VILL|MAP1B|CFL1|ADD1|ADD2|ADD3|FGF13|WASHC2C|CLASP1|SCIN|CLASP2|HDAC6|GSN|APC|ATXN7|CRACD|IRAK3|SPECC1L|MAP6D1|MID1|SPTA1|APC2|BMERB1|MID1IP1|SPTAN1|SPTB|SPTBN1|SPTBN2|SPTBN4|SPTBN5|LIMA1|DMTN|CKAP2|ARHGEF2|CLEC16A|LMOD1|LMOD2|LMOD3|PLEKHH2|SVIL|SWAP70|WDR47|TNF|TTBK2|PHF23|ASB2|PIK3CA|RUBCN|AVIL|TAOK1|SCAF4|HDGFL3|SCAF8|TMEM39A|SPEF1|UBQLN4|CAMSAP2|CIB1|MTPN|TMOD1|DIAPH3|TMOD2|TMOD3|EPS8|TMOD4|C…	88	GOBP_NEGATIVE_REGULATION_OF_PROTEIN_CONTAINING_COMPLEX_DISASSEMBLY	1.5957	0.0048	GOBP_NEGATIVE_REGULATION_OF_PROTEIN_CONTAINING_COMPLEX_DISASSEMBLY	NEGATIVE REGULATION OF PROTEIN CONTAINING COMPLEX DISASSEMBLY	Actin-diven cytoskeletal remodelling
3	Actin-diven cytoskeletal remodelling	3.09691	3.09691	3.09691	0.5049	0.0155	SNCA|VILL|CFL1|ADD1|ADD2|ADD3|WASHC2C|SCIN|CDH5|GSN|CRACD|SLIT2|KANK1|ARFGEF1|KANK2|KANK3|KANK4|FKBP4|PFN1|CYRIB|PFN2|SPTA1|SPTAN1|HIP1R|SPTB|SPTBN1|SPTBN2|SPTBN4|DYRK1A|SPTBN5|DMTN|SSH1|SSH2|CLIP3|SSH3|LMOD1|LMOD2|LMOD3|STMN1|SVIL|ASB2|AVIL|BBS4|MIR214|PRKCD|MKKS|MTPN|TMOD1|MYADM|TMOD2|TMOD3|EPS8|INPP5J|TMOD4|CAPG|CAPZA1|CAPZA2|STMN2|TMSB4X|CAPZA3|CAPZB|CARMIL1|RDX|CARMIL2|TUBB4A|VIL1|FLII|TRIOB…	75	GOBP_NEGATIVE_REGULATION_OF_PROTEIN_POLYMERIZATION	1.7815	0.0008	GOBP_NEGATIVE_REGULATION_OF_PROTEIN_POLYMERIZATION	NEGATIVE REGULATION OF PROTEIN POLYMERIZATION	Actin-diven cytoskeletal remodelling
3	Actin-diven cytoskeletal remodelling	2.69897	2.69897	2.69897	0.3619	0.0283	KATNBL1|SLAIN1|ACTN2|SLAIN2|ROCK2|S100A10|ADD3|GPR65|VPS4B|CKAP5|GRB2|HSPA1A|PROX1|SCIN|HSPA1B|SDC4|CLIP1|HCK|SEMA5A|SERPINF2|ALOX15|SFRP1|AMOT|CENPJ|CEP120|RPS3|NUMA1|PDE4DIP|TOGARAM1|APOA1|ITGB1BP1|MAPK15|SMAD3|ARF6|SNX9|SORBS3|PLK4|POC1B|CDKN1B|KIRREL1|DRG1|ARHGEF10|ARHGEF10L|ARHGEF15|DCTN1|LIMK1|ARHGEF5|LMOD1|LMOD2|ARPC2|LPAR1|OCLN|PSRC1|SWAP70|MAGEL2|SYNPO|MAPT|SYNPO2|MET|SYNPO2L|TAC1|TACR1|…	189	GOBP_POSITIVE_REGULATION_OF_CYTOSKELETON_ORGANIZATION	1.5365	0.002	GOBP_POSITIVE_REGULATION_OF_CYTOSKELETON_ORGANIZATION	POSITIVE REGULATION OF CYTOSKELETON ORGANIZATION	Actin-diven cytoskeletal remodelling
3	Actin-diven cytoskeletal remodelling	2.37675	2.37675	2.37675	0.347	0.0443	SLAIN1|ACTN2|SLAIN2|ROCK2|S100A10|GPR65|CKAP5|GRB2|HSPA1A|PROX1|SCIN|HSPA1B|SDC4|CLIP1|HCK|SEMA5A|GPX1|SERPINF2|ALOX15|SFRP1|AMOT|EFEMP2|RPS3|NUMA1|PDE4DIP|TOGARAM1|APOA1|ITGB1BP1|SMAD3|ARF6|SNX9|SORBS3|CDKN1B|KIRREL1|DRG1|ARHGEF10|ARHGEF10L|ARHGEF15|DCTN1|LIMK1|ARHGEF5|LMOD1|LMOD2|ARPC2|LPAR1|OCLN|PSRC1|SWAP70|MAGEL2|SYNPO|MAPT|SYNPO2|APP|MET|SYNPO2L|TAC1|TACR1|AURKB|BAG4|APOE|TENM1|TESK1|USP8|T…	178	GOBP_POSITIVE_REGULATION_OF_SUPRAMOLECULAR_FIBER_ORGANIZATION	1.452	0.0042	GOBP_POSITIVE_REGULATION_OF_SUPRAMOLECULAR_FIBER_ORGANIZATION	POSITIVE REGULATION OF SUPRAMOLECULAR FIBER ORGANIZATION	Actin-diven cytoskeletal remodelling
3	Actin-diven cytoskeletal remodelling	4	4	4	0.3709	0.0004	RND1|RND2|RND3|RNH1|ROCK2|S100A10|S1PR1|SCIN|SDC4|SEMA5A|SERPINF2|SFRP1|SH3BP1|SHANK1|SHANK3|SIGLEC15|SLC4A2|SLIT2|SMAD3|SMAD4|SMIM22|SNX9|SORBS3|SPECC1L|SPTA1|SPTAN1|SPTB|SPTBN1|SPTBN2|SPTBN4|SPTBN5|SSH1|SSH2|SSH3|STAU2|STMN1|SVIL|SWAP70|SYNPO|SYNPO2|SYNPO2L|TAC1|TACR1|TACSTD2|TAOK1|TAOK2|TENM1|TESK1|TGFB1|TGFB2|TGFB3|TGFBR1|TJP1|TMEFF2|TMOD1|TMOD2|TMOD3|TMOD4|TMSB4X|TMSB4Y|TRIM27|TRIOBP|TRPM2|T…	401	GOBP_REGULATION_OF_ACTIN_FILAMENT_BASED_PROCESS	1.7088	0	GOBP_REGULATION_OF_ACTIN_FILAMENT_BASED_PROCESS	REGULATION OF ACTIN FILAMENT BASED PROCESS	Actin-diven cytoskeletal remodelling
3	Actin-diven cytoskeletal remodelling	3.30103	3.30103	3.30103	0.4209	0.0118	ACTN2|GBA2|ADD1|ADD2|ADD3|GRB2|SCIN|HAX1|HCK|HCLS1|SEMA5A|ALOX15|SH3BP1|SLIT2|ARF6|KANK1|ARFGEF1|KANK2|KANK3|SNX9|KANK4|ARHGAP18|SPECC1L|ARHGAP28|KIRREL1|ARHGAP35|SPTA1|ARHGAP40|SPTAN1|SPTB|SPTBN1|SPTBN2|SPTBN4|SPTBN5|LATS1|LIMA1|SSH1|SSH2|SSH3|LMOD1|LMOD2|ARPC2|LMOD3|ARPC3|SVIL|ARPC5|SWAP70|ARPC5L|ASB2|AVIL|BAG4|BBS4|TENM1|MIR214|MKKS|MLST8|BRK1|BAIAP2|C15ORF62|MTOR|BAIAP2L1|MTPN|BAIAP2L2|TMOD1|…	153	GOBP_REGULATION_OF_ACTIN_FILAMENT_LENGTH	1.7026	0.0005	GOBP_REGULATION_OF_ACTIN_FILAMENT_LENGTH	REGULATION OF ACTIN FILAMENT LENGTH	Actin-diven cytoskeletal remodelling
3	Actin-diven cytoskeletal remodelling	3.1549	3.1549	3.1549	0.3466	0.0155	ACTG1|ACTN2|RNH1|ROCK2|ADD1|S100A10|ADD2|S1PR1|ADD3|SCIN|SDC4|SEMA5A|SERPINF2|ALMS1|ALOX15|SFRP1|AMOT|SH3BP1|SHANK1|SHANK3|AP1AR|APOA1|ARAP1|SLIT2|ARF1|SMAD3|ARF6|ARFGEF1|ARFIP1|SNX9|ARFIP2|SORBS3|ARHGAP18|SPECC1L|ARHGAP28|ARHGAP35|SPTA1|ARHGAP40|SPTAN1|SPTB|ARHGAP6|SPTBN1|ARHGEF10|SPTBN2|ARHGEF10L|SPTBN4|SPTBN5|ARHGEF15|ARHGEF18|SSH1|SSH2|SSH3|ARHGEF5|ARPC2|STMN1|ARPC3|SVIL|ARPC5|SWAP70|ARPC5L|A…	272	GOBP_REGULATION_OF_ACTIN_FILAMENT_ORGANIZATION	1.5237	0.0007	GOBP_REGULATION_OF_ACTIN_FILAMENT_ORGANIZATION	REGULATION OF ACTIN FILAMENT ORGANIZATION	Actin-diven cytoskeletal remodelling
3	Actin-diven cytoskeletal remodelling	2.55284	2.55284	2.55284	0.4182	0.0341	GBA2|ADD1|ADD2|ADD3|GRB2|SCIN|HAX1|HCK|HCLS1|ALOX15|SLIT2|ARF6|KANK1|ARFGEF1|KANK2|KANK3|SNX9|KANK4|ARHGAP18|ARHGAP28|KIRREL1|SPTA1|ARHGAP40|SPTAN1|SPTB|SPTBN1|SPTBN2|SPTBN4|SPTBN5|LATS1|SSH1|SSH2|SSH3|LMOD1|LMOD2|ARPC2|LMOD3|ARPC3|SVIL|ARPC5|ARPC5L|ASB2|AVIL|BAG4|BBS4|TENM1|MIR214|MKKS|MLST8|BAIAP2|C15ORF62|MTOR|BAIAP2L1|MTPN|BAIAP2L2|TMOD1|MYADM|TMOD2|TMOD3|EPS8|TMOD4|CAPG|CAPZA1|CAPZA2|TMSB4X|…	130	GOBP_REGULATION_OF_ACTIN_FILAMENT_POLYMERIZATION	1.645	0.0028	GOBP_REGULATION_OF_ACTIN_FILAMENT_POLYMERIZATION	REGULATION OF ACTIN FILAMENT POLYMERIZATION	Actin-diven cytoskeletal remodelling
3	Actin-diven cytoskeletal remodelling	3.69897	3.69897	3.69897	0.298	0.0062	RND1|KATNBL1|RND2|RND3|SLAIN1|RNH1|SLAIN2|ROCK2|S100A10|S1PR1|SCIN|CDH5|SDC4|SEMA5A|SERPINF2|SFRP1|SH3BP1|SHANK1|SHANK3|SIGLEC15|SLC4A2|SLIT2|SMAD3|SMAD4|SMIM22|SNX9|SORBS3|SPECC1L|MAPRE2|SPTA1|SPTAN1|SPTB|SPTBN1|SPTBN2|SPTBN4|SPTBN5|SSH1|SSH2|SSH3|STAU2|STMN1|OCLN|SVIL|SWAP70|SYDE1|SYNPO|SYNPO2|SYNPO2L|TAC1|TACR1|TACSTD2|TAOK1|TAOK2|TENM1|TESK1|TGFB1|TGFB2|TGFB3|TGFBR1|TJP1|TMEFF2|TMOD1|BICD1|TM…	548	GOBP_REGULATION_OF_CYTOSKELETON_ORGANIZATION	1.4585	0.0002	GOBP_REGULATION_OF_CYTOSKELETON_ORGANIZATION	REGULATION OF CYTOSKELETON ORGANIZATION	Actin-diven cytoskeletal remodelling
3	Actin-diven cytoskeletal remodelling	2.92082	2.92082	2.92082	0.3699	0.0208	SLAIN1|SLAIN2|ADD1|ADD2|ADD3|HSP90AA1|HSPA1A|SCIN|CDH5|HSPA1B|ALOX15|SLIT2|ARF6|ARFGEF1|SNX9|ARHGAP18|ARHGAP28|CDKN1B|SPTA1|ARHGAP40|SPTAN1|SPTB|SPTBN1|SPTBN2|SPTBN4|SPTBN5|DCTN1|SSH1|SSH2|CLIP3|SSH3|ARPC2|STMN1|ARPC3|OCLN|PSRC1|SVIL|ARPC5|ARPC5L|ASB2|AVIL|BAG4|BBS4|TENM1|CAMSAP2|C15ORF62|TMOD1|TMOD2|TMOD3|INPP5J|TMOD4|CAPG|CAPZA1|CAPZA2|TMSB4X|CAPZA3|CAPZB|CARMIL1|CARMIL2|CCL11|CCL21|CCL24|TRIOB…	202	GOBP_REGULATION_OF_PROTEIN_POLYMERIZATION	1.5751	0.0012	GOBP_REGULATION_OF_PROTEIN_POLYMERIZATION	REGULATION OF PROTEIN POLYMERIZATION	Actin-diven cytoskeletal remodelling
3	Actin-diven cytoskeletal remodelling	2.61979	2.61979	2.61979	0.2973	0.0313	SLAIN1|RNH1|SLAIN2|ROCK2|S100A10|S1PR1|COL6A1|SCIN|CDH5|SDC4|SEMA5A|SERPINF2|SFRP1|SH3BP1|SHANK1|SHANK3|EMILIN1|SLIT2|SMAD3|SMAD4|SNX9|SORBS3|SPECC1L|SPTA1|SPTAN1|SPTB|SPTBN1|SPTBN2|SPTBN4|SPTBN5|SSH1|SSH2|SSH3|STMN1|OCLN|SVIL|SWAP70|SYNPO|SYNPO2|SYNPO2L|TAC1|TACR1|TACSTD2|TAOK1|APOE|TENM1|TESK1|TGFB3|TGFBR1|TJP1|TMEFF2|TMOD1|TMOD2|TMOD3|TMOD4|TMSB4X|TMSB4Y|TNXB|TRIM27|TRIOBP|KIF21A|TRPV4|TSC1|TT…	402	GOBP_REGULATION_OF_SUPRAMOLECULAR_FIBER_ORGANIZATION	1.3926	0.0024	GOBP_REGULATION_OF_SUPRAMOLECULAR_FIBER_ORGANIZATION	REGULATION OF SUPRAMOLECULAR FIBER ORGANIZATION	Actin-diven cytoskeletal remodelling
30	Anterior–Posterior Patterning	4	4	4	0.4459	0.0008	CRB2|DKK1|DLL3|TSHZ1|DMRT2|WLS|WNT1|WNT2|SFRP1|WNT2B|GBX2|WNT3|WNT3A|GPC3|WNT8A|XRCC2|YY1|ZIC3|SMAD3|SMAD4|AURKA|ALDH1A2|LRP5|ETS2|MESP1|SRF|CDX4|LEFTY2|PGAP1|RNF2|FOXB1|TASOR|FOXF1|ARC|BARX1|BHLHE40|FRS2|BHLHE41|BPTF|FUZ|BTG2|CELSR2|CYP26C1|FEZF1|FEZF2|SEMA3C|GRSF1|TGFBR1|HELT|HES2|HES3|HES4|HES6|HOXA10|HOXA6|GDF3|HOXC5|PBX1|HOXC6|MLLT3|NR2F2|OFD1|WT1|SMO|PLD6|SOX17|TBX1|HES5|HES7|HEY1|WNT5A|HEY…	224	GOBP_ANTERIOR_POSTERIOR_PATTERN_SPECIFICATION	1.8804	0	GOBP_ANTERIOR_POSTERIOR_PATTERN_SPECIFICATION	ANTERIOR POSTERIOR PATTERN SPECIFICATION	Anterior–Posterior Patterning
30	Anterior–Posterior Patterning	3.22185	3.22185	3.22185	0.3121	0.0131	CRB2|DKK1|DLL3|DLL4|TSHZ1|DMRT2|EFNB1|ENG|ERBB4|LMX1B|UNCX|VAX2|FOLR1|RNF220|SFRP1|GBX2|WDR19|GPC3|WNT7B|HIF1A|YY1|ZEB1|SHROOM3|ISL1|SYNGAP1|SMAD3|SMAD4|LAMA5|CFAP45|CFAP52|CFAP53|WNT8B|SIM2|LRP5|ETS2|MEGF8|MESP1|EYA1|SRF|FGFR2|NRP2|DPCD|OVOL2|CDX4|LEFTY2|PGAP1|FOXA1|RNF2|FOXB1|TASOR|FOXD1|FOXF1|ENKUR|ARC|BARX1|BHLHE40|FRS2|BHLHE41|BPTF|FUZ|BTG2|CELSR2|CYP26C1|ASCL1|FEZF1|FEZF2|SEMA3C|GRSF1|TGFBR…	484	GOBP_PATTERN_SPECIFICATION_PROCESS	1.4628	0.0006	GOBP_PATTERN_SPECIFICATION_PROCESS	PATTERN SPECIFICATION PROCESS	Anterior–Posterior Patterning
30	Anterior–Posterior Patterning	2.56864	2.56864	2.56864	0.4468	0.0337	CRB2|DKK1|DLL3|DMRT2|FOXC1|SFRP1|TIFAB|WNT3A|MSGN1|XRCC2|MYF5|MYF6|ZIC3|SMAD3|SMAD4|LAMA5|NEUROG1|NKD1|NKX3-1|NLE1|MESP1|NRARP|NRP2|OSR1|PALB2|FOXB1|TASOR|FOXF1|PCDH8|HOXA2|FRS2|PCSK6|SEMA3C|SEMA3F|HOXD8|PLXNA2|GDF3|MLLT3|POFUT1|WT1|POGLUT1|PPP2R3A|PLD6|HES5|HES7|WNT5A|MTF2|TP53|NCKAP1|RIPPLY1|TDRD1|RIPPLY2|TDRD5|BMPR1A|TDRD6|DLL1|EPB41L5|TDRD7|EGR2|TDRKH|NRP1|CRIPTO|LEF1|COBL|IRX1|IRX2|IRX3|SFRP…	104	GOBP_SEGMENTATION	1.6628	0.0027	GOBP_SEGMENTATION	SEGMENTATION	Anterior–Posterior Patterning
47	Arsenic-Induced Stress Response	3.1549	-3.1549	3.1549	-0.749	0.0154	DDX3X|UROS|DHX36|ZFAND2A|DAXX|VCP|PPIF|ZC3H12A|MAPK13|HNRNPA1|SLC38A2|MKNK2|HSF1|HMOX1|GSTO1|ZFAND1|GSTO2	17	GOBP_CELLULAR_RESPONSE_TO_ARSENIC_CONTAINING_SUBSTANCE	-1.9703	0.0007	GOBP_CELLULAR_RESPONSE_TO_ARSENIC_CONTAINING_SUBSTANCE	CELLULAR RESPONSE TO ARSENIC CONTAINING SUBSTANCE	Arsenic-Induced Stress Response
47	Arsenic-Induced Stress Response	3.22185	-3.22185	3.22185	-0.6634	0.014	NEFL|DDX3X|CPOX|AQP9|SRRT|ATR|RBM4|PPIF|FECH|SERPINF1|GSTO1|ZFAND1|GSTO2|UROS|DHX36|ZFAND2A|DAXX|RNF4|VCP|GCLC|ZC3H12A|GRIA1|MAPK13|HNRNPA1|SLC38A2|MKNK2|HSF1|CYP1A1|HMOX1|ALAD	30	GOBP_RESPONSE_TO_ARSENIC_CONTAINING_SUBSTANCE	-1.8956	0.0006	GOBP_RESPONSE_TO_ARSENIC_CONTAINING_SUBSTANCE	RESPONSE TO ARSENIC CONTAINING SUBSTANCE	Arsenic-Induced Stress Response
12	Cardiac Structure Development	2.52288	2.52288	2.52288	0.66	0.0358	MDM4|BMP2|NKX2-5|ACVR1|DLL4|HEG1|MDM2|ENG|BMPR2|PITX2|PROX1|GATA4|GJA5|TBX20|TBX5|WNT2|DAND5|TGFB2|BMP10|NPHP3|CCN1|SHOX2|ZFPM1|ISL1|WNT11|SMO|NOG|MYH6|NOTCH1|NSD2|ANK2|MESP1|NOTCH2|SOX4|WNT5A|HEY2|SOS1	37	GOBP_CARDIAC_ATRIUM_DEVELOPMENT	1.817	0.003	GOBP_CARDIAC_ATRIUM_DEVELOPMENT	CARDIAC ATRIUM DEVELOPMENT	Cardiac Structure Development
12	Cardiac Structure Development	4	4	4	0.4364	0.0042	BMP2|TNNI1|FGF8|DLL4|TRIP11|TAB1|ENG|HES1|ADPRHL1|PITX2|PROX1|UBE4B|MKS1|DNAH11|SNX17|FOXC1|WNT2|EGLN1|NDST1|HIF1A|ZFPM2|ISL1|EVA1A|SLIT2|FGFRL1|SMAD4|EDNRA|ID2|MESP1|NOTCH2|FZD1|FZD2|SRF|ADAMTS6|AP2B1|MYOCD|CNTRL|DCTN5|GREB1L|FGFR2|HECTD1|NRP2|FHL2|NPRL3|OVOL2|HEG1|DHRS3|MDM2|ADGRG6|FOXF1|HOXA13|FRS2|TGFB1|TGFB2|SEMA3C|BMP10|TGFBR1|GATA6|PLXND1|SALL1|STRA6|MSX2|WNT11|MYL2|MATR3|SMO|GRHL2|LRP2|ME…	177	GOBP_CARDIAC_CHAMBER_DEVELOPMENT	1.78	0.0001	GOBP_CARDIAC_CHAMBER_DEVELOPMENT	CARDIAC CHAMBER DEVELOPMENT	Cardiac Structure Development
12	Cardiac Structure Development	3.04576	3.04576	3.04576	0.4413	0.0169	BMP2|TNNI1|FGF8|DLL4|ENG|HES1|ADPRHL1|PITX2|PROX1|UBE4B|MKS1|DNAH11|FOXC1|WNT2|EGLN1|HIF1A|ZFPM2|ISL1|EVA1A|SLIT2|FGFRL1|SMAD4|EDNRA|ID2|MESP1|NOTCH2|FZD1|FZD2|SRF|FGFR2|NRP2|FHL2|OVOL2|HEG1|DHRS3|MDM2|ADGRG6|FOXF1|TGFB1|TGFB2|SEMA3C|BMP10|TGFBR1|GATA6|MSX2|WNT11|MYL2|SMO|GRHL2|LRP2|MEF2C|HAND1|TBX1|GSK3A|NOS3|HEY1|HEY2|NRG1|HEYL|TP53|CHD7|CAV3|NAGLU|VANGL2|DSP|NKX2-5|ACVR1|BMPR1A|JAG1|MIR17HG|RO…	135	GOBP_CARDIAC_CHAMBER_MORPHOGENESIS	1.7111	0.0009	GOBP_CARDIAC_CHAMBER_MORPHOGENESIS	CARDIAC CHAMBER MORPHOGENESIS	Cardiac Structure Development
12	Cardiac Structure Development	4	4	4	0.5055	0.0015	FGF8|TRIP11|TAB1|ENG|HES1|PITX2|PROX1|MKS1|DNAH11|SNX17|EGLN1|NDST1|ZFPM2|ISL1|SLIT2|FGFRL1|SMAD4|ID2|NOTCH2|FZD1|FZD2|ADAMTS6|AP2B1|CNTRL|DCTN5|FGFR2|HECTD1|NRP2|NPRL3|HEG1|DHRS3|MDM2|HOXA13|FRS2|TGFB2|SEMA3C|TGFBR1|GATA6|PLXND1|SALL1|STRA6|MSX2|WNT11|MATR3|SMO|LRP2|HAND1|TBX1|ANK2|MAML1|NOS3|HEY1|WNT5A|HEY2|HEYL|TP53|CHD7|VANGL2|MDM4|NKX2-5|ACVR1|BMPR1A|JAG1|MIR17HG|ROBO1|ROBO2|BMPR2|NRP1|PDE2A…	115	GOBP_CARDIAC_SEPTUM_DEVELOPMENT	1.9603	0	GOBP_CARDIAC_SEPTUM_DEVELOPMENT	CARDIAC SEPTUM DEVELOPMENT	Cardiac Structure Development
12	Cardiac Structure Development	2.35655	2.35655	2.35655	0.4608	0.0453	VANGL2|FGF8|NKX2-5|ACVR1|BMPR1A|JAG1|MIR17HG|ROBO1|ROBO2|ENG|HES1|BMPR2|NRP1|PITX2|PROX1|GATA4|GJA5|CITED2|MKS1|RARA|DNAH11|EGLN1|CCN1|ZFPM1|ZFPM2|ISL1|MIR1-1|BMP5|SLIT2|FGFRL1|SMAD4|NOG|ID2|NOTCH1|NSD2|SMAD6|SOX11|SMAD7|TGFBR2|NOTCH2|FZD1|FZD2|FGFR2|NRP2|APLNR|RARB|PARVA|DHRS3|MDM2|RBM15|ADAMTS19|TBX2|TBX20|TBX3|TBX5|TGFB2|SAV1|SEMA3C|TGFBR1|GATA6|SLIT3|MSX2|RBPJ|TGFBR3|WNT11|SMO|LRP2|HAND1|TBX1…	78	GOBP_CARDIAC_SEPTUM_MORPHOGENESIS	1.6453	0.0044	GOBP_CARDIAC_SEPTUM_MORPHOGENESIS	CARDIAC SEPTUM MORPHOGENESIS	Cardiac Structure Development
12	Cardiac Structure Development	2.55284	2.55284	2.55284	0.4065	0.0345	TNNI1|DLL4|TRIP11|ENG|HES1|PITX2|PROX1|UBE4B|FOXC1|EGLN1|HIF1A|ZFPM2|ISL1|EVA1A|SLIT2|FGFRL1|SMAD4|EDNRA|ID2|MESP1|FZD1|FZD2|AP2B1|MYOCD|CNTRL|DCTN5|GREB1L|FGFR2|HECTD1|NPRL3|HEG1|MDM2|FOXF1|HOXA13|FRS2|TGFB1|TGFB2|SEMA3C|BMP10|TGFBR1|SALL1|STRA6|WNT11|MYL2|MATR3|GRHL2|LRP2|MEF2C|HAND1|GSK3A|NOS3|HEY1|WNT5A|HEY2|NRG1|HEYL|CHD7|NAGLU|VANGL2|MDM4|DSP|NKX2-5|ACVR1|BMPR1A|JAG1|MIR17HG|ROBO1|ROBO2|BMP…	134	GOBP_CARDIAC_VENTRICLE_DEVELOPMENT	1.5758	0.0028	GOBP_CARDIAC_VENTRICLE_DEVELOPMENT	CARDIAC VENTRICLE DEVELOPMENT	Cardiac Structure Development
12	Cardiac Structure Development	4	4	4	0.3487	0	DKK1|TNNI1|MTHFD1|ROCK2|DLL4|SMG9|TRIP11|S1PR1|COL6A1|ENG|ERBB4|UBE4B|FAM114A1|FGF19|EFNB2|FOLR1|GPC3|EGLN1|HAS2|HIF1A|HTR2B|SHC1|YY1|ILK|ZFPM2|ISL1|EMILIN1|ITGA3|ATF2|SLIT2|DHX36|JUN|SMAD3|SMAD4|EPHB4|ERBB2|PCNA|ID2|RBM24|MEGF8|MESP1|OXCT1|ZFP36L1|EYA1|MIR19B1|POU4F2|PPARD|SRF|MIR222|MIXL1|MMP2|SH3PXD2B|SIK1|FGFR2|NRP2|FHL2|MAPK14|OVOL2|GYS1|DZIP1|SYNPO2L|PTPN11|FOXF1|FRS2|TGFB1|ASCL1|FZD7|TGFB2…	633	GOBP_HEART_DEVELOPMENT	1.6995	0	GOBP_HEART_DEVELOPMENT	HEART DEVELOPMENT	Cardiac Structure Development
12	Cardiac Structure Development	2.45593	2.45593	2.45593	0.3455	0.0399	DKK1|TNNI1|DLL4|S1PR1|ENG|ADPRHL1|UBE4B|WNT16|FOLR1|WNT2|WNT3A|ANKRD1|EGLN1|HAS2|HIF1A|HTR2B|YAP1|ILK|ZFPM2|ZIC3|ISL1|ATF2|SLIT2|JUN|SMAD3|SMAD4|EPHB4|ALDH1A2|ID2|MEGF8|MESP1|EYA1|MIR19B1|SRF|CCDC39|FGFR2|NRP2|FHL2|OVOL2|DHRS3|SYNPO2L|ASB2|FOXF1|TGFB1|TGFB2|SEMA3C|TGFB3|BMP10|TGFBR1|INSR|GATA5|GATA6|WNT11|SMO|GRHL2|SNAI1|LRP2|MEF2C|SNAI2|SOX17|HAND1|SOX9|TBX1|MIR17|MIR19A|NOS3|TWIST1|HEY1|WNT5A|H…	278	GOBP_HEART_MORPHOGENESIS	1.5069	0.0035	GOBP_HEART_MORPHOGENESIS	HEART MORPHOGENESIS	Cardiac Structure Development
12	Cardiac Structure Development	3.69897	3.69897	3.69897	0.5306	0.0066	VANGL2|MDM4|NKX2-5|ACVR1|BMPR1A|TRIP11|MIR17HG|ROBO1|ROBO2|HES1|BMPR2|PDE2A|PITX2|PROX1|GATA4|GJA5|CITED2|SALL4|XIRP2|DAND5|EGLN1|CCN1|ZFPM1|ZFPM2|LUZP1|MIR1-1|SLIT2|FGFRL1|SMAD4|NOG|ID2|NOTCH1|NSD2|SMAD6|SOX11|SMAD7|TGFBR2|FZD1|FZD2|AP2B1|CNTRL|LMO4|PRDM1|DCTN5|FGFR2|HECTD1|APLNR|NPRL3|SUFU|HEG1|MDM2|PAX8|RBM15|ADAMTS19|HOXA13|FRS2|TBX3|TBX5|TGFB2|SAV1|TGFBR1|PTK7|SALL1|STRA6|SLIT3|RBPJ|TGFBR3|W…	78	GOBP_VENTRICULAR_SEPTUM_DEVELOPMENT	1.8966	0.0002	GOBP_VENTRICULAR_SEPTUM_DEVELOPMENT	VENTRICULAR SEPTUM DEVELOPMENT	Cardiac Structure Development
1	Cell Adhesion to Extracellular Substrate	4	4	4	0.361	0.0018	ACTG1|CD63|CDH13|ACTN1|ACTN2|SLK|ACTN3|ROCK2|DOCK1|DOCK5|MIR183|S100A10|VTN|SDC4|FAT2|FERMT1|WNT1|ALOX15|SFRP1|EDA|VAMP3|HAS2|ANTXR1|AP1AR|ILK|APOA1|EMILIN1|ITGA2|ITGA3|ITGA4|CSF1|ITGB4|ITGB7|ADAMTS12|EPHB1|ITGB2|SMAD3|EPHB3|LAMA5|SORBS1|AXL|SORBS3|MACF1|VCAM1|MAP4K4|ARHGAP6|ITGAM|HACD1|CEACAM6|HSD17B12|SRC|SRCIN1|PPARD|SRF|SRGAP2|FBLN5|ARPC2|ANGPTL3|ATXN3|FOXF1|TACSTD2|RADIL|RCC2|TAOK2|FUT1|BCL2…	364	GOBP_CELL_SUBSTRATE_ADHESION	1.6407	0	GOBP_CELL_SUBSTRATE_ADHESION	CELL SUBSTRATE ADHESION	Cell Adhesion to Extracellular Substrate
1	Cell Adhesion to Extracellular Substrate	4	4	4	0.4989	0.0013	CDH13|DOCK1|DOCK5|S100A10|VTN|SDC4|FERMT1|THY1|ALOX15|HRG|SFRP1|EFEMP2|HAS2|CDK6|ILK|APOA1|ITGB1BP1|EMILIN1|ITGB3|ITGA3|CSF1|JAK2|SMAD3|NDNF|MAP4K4|HACD1|CEACAM6|HSD17B12|ARPC2|FOXF1|FUT1|RREB1|TESK1|P4HB|FBLN1|BRAF|MDK|CALR|MYADM|PLEKHA2|DISC1|FLNA|POLDIP2|C1QBP|CARMIL1|MYOC|CCL21|TRIOBP|RELL2|CCR7|LIMS2|RIN2|RSU1|AGR2|CDC42|TSC1|NID1|UNC13D|DMP1|NEDD9|PLPP3|EMP2|CFL1|EPB41L5|SPOCK2|NRP1|RRAS|HT…	128	GOBP_POSITIVE_REGULATION_OF_CELL_SUBSTRATE_ADHESION	1.9514	0	GOBP_POSITIVE_REGULATION_OF_CELL_SUBSTRATE_ADHESION	POSITIVE REGULATION OF CELL SUBSTRATE ADHESION	Cell Adhesion to Extracellular Substrate
1	Cell Adhesion to Extracellular Substrate	3.22185	3.22185	3.22185	0.5958	0.013	NEDD9|ARPC2|CSPG5|DOCK1|DOCK5|OLFM4|S100A10|NRP1|HTN1|PREX1|RREB1|TESK1|P4HB|CIB1|BRAF|HAS2|MDK|ILK|APOA1|CRK|CALR|ITGB3|MYADM|RAC1|RAC3|CASS4|FLNA|FERMT2|C1QBP|FGG|CARMIL1|DAB2|MYOC|TRIOBP|LIMS2|ABL1|ARHGEF7|CDC42|LIMS1|CRKL|FGA|UNC13D|FGB	43	GOBP_POSITIVE_REGULATION_OF_SUBSTRATE_ADHESION_DEPENDENT_CELL_SPREADING	1.9325	0.0006	GOBP_POSITIVE_REGULATION_OF_SUBSTRATE_ADHESION_DEPENDENT_CELL_SPREADING	POSITIVE REGULATION OF SUBSTRATE ADHESION DEPENDENT CELL SPREADING	Cell Adhesion to Extracellular Substrate
1	Cell Adhesion to Extracellular Substrate	4	4	4	0.417	0.0012	ACTG1|CDH13|SLK|ROCK2|DOCK1|DOCK5|MIR183|S100A10|VTN|SDC4|FERMT1|WNT1|ALOX15|SFRP1|HAS2|AP1AR|ILK|APOA1|EMILIN1|ITGA3|CSF1|SMAD3|MACF1|MAP4K4|ARHGAP6|HACD1|CEACAM6|HSD17B12|SRC|ARPC2|ATXN3|FOXF1|TACSTD2|RCC2|FUT1|BCL2|RREB1|TESK1|BCL6|FZD4|P4HB|FBLN1|FZD7|BRAF|SEMA3E|BST1|MDK|TLN1|CALR|DISC1|GREM1|CARMIL1|THBS1|CCL21|TRIOBP|WDPCP|CCR7|RIN2|PLG|AGR2|CDC42|TSC1|UNC13D|DMP1|HOXA7|PLPP3|CFL1|WASHC2C|…	225	GOBP_REGULATION_OF_CELL_SUBSTRATE_ADHESION	1.7864	0	GOBP_REGULATION_OF_CELL_SUBSTRATE_ADHESION	REGULATION OF CELL SUBSTRATE ADHESION	Cell Adhesion to Extracellular Substrate
1	Cell Adhesion to Extracellular Substrate	4	4	4	0.5565	0.0054	NEDD9|DOCK1|DOCK5|S100A10|SPRY4|WASHC2C|NRP1|HTN1|MELTF|CORO1C|HAS2|AP1AR|ILK|APOA1|CRK|ITGB1BP1|ITGB3|CASS4|KANK1|FGG|DAB2|LIMS1|DMTN|CRKL|FGA|PTK2|FGB|ARPC2|CSPG5|EFNA5|OLFM4|PDPN|PKP2|TACSTD2|RCC2|PREX1|RREB1|TESK1|P4HB|FBLN1|CIB1|BRAF|MDK|CALR|MYADM|RAC1|RAC3|FLNA|FERMT2|POSTN|C1QBP|CARMIL1|ACTN4|GBP1|MYOC|TRIOBP|LIMS2|ABL1|ARHGEF7|CDC42|UNC13D	61	GOBP_REGULATION_OF_SUBSTRATE_ADHESION_DEPENDENT_CELL_SPREADING	1.9329	0.0001	GOBP_REGULATION_OF_SUBSTRATE_ADHESION_DEPENDENT_CELL_SPREADING	REGULATION OF SUBSTRATE ADHESION DEPENDENT CELL SPREADING	Cell Adhesion to Extracellular Substrate
1	Cell Adhesion to Extracellular Substrate	4	4	4	0.4963	0.0023	DOCK1|DOCK5|S100A10|MELTF|VAMP3|HAS2|ANTXR1|AP1AR|ILK|APOA1|ITGB1BP1|ITGB3|ITGA4|ITGB7|EPHB3|KANK1|LAMA5|AXL|SRC|SRCIN1|SRGAP2|TYRO3|ARPC2|TACSTD2|MICALL2|RADIL|RCC2|RREB1|TESK1|FZD4|FERMT3|LPXN|P4HB|FBLN1|FZD7|BRAF|MDK|PEAK1|CALR|MYADM|FLNA|NTN4|POSTN|C1QBP|CARMIL1|MERTK|ACTN4|BVES|MYOC|TRIOBP|KIF14|LIMS2|CDC42|LAMC1|UNC13D|NEDD9|SPRY4|WASHC2C|NRP1|HTN1|AKIP1|CORO1C|PARVB|ITGA8|PARVG|ITGAV|CRK|C…	100	GOBP_SUBSTRATE_ADHESION_DEPENDENT_CELL_SPREADING	1.9056	0	GOBP_SUBSTRATE_ADHESION_DEPENDENT_CELL_SPREADING	SUBSTRATE ADHESION DEPENDENT CELL SPREADING	Cell Adhesion to Extracellular Substrate
8	Cell Cycle Regulation & Chromosome Organization	3.09691	3.09691	3.09691	0.3571	0.0155	NEK11|LCMT1|CHFR|WAC|BUB1|BRSK1|BUB1B|DUSP1|PROX1|WDR76|XPC|XRCC3|ORC1|ZFYVE19|PABIR1|MAP3K20|FANCD2|ATF2|ZWINT|CCND1|KNL1|DONSON|CDK5RAP3|DOT1L|CDKN1A|BRCA2|FOXN3|TREX1|DTL|DYNC1LI1|CHEK1|USP44|CHEK2|CRY1|E2F1|EME1|PRP4K|EME2|MRE11|MUC1|MAD2L2|MAPK14|TAOK3|ETAA1|FBXO6|PTPN11|HORMAD1|NAE1|FEM1B|RAD1|RAD17|AURKB|FOXO4|CUL4A|TAOK1|TAOK2|RAD50|RAD51|FBXO4|PRPF19|RAD9B|BRCC3|RBBP8|LYN|DNA2|GEN1|TRIM3…	185	GOBP_CELL_CYCLE_CHECKPOINT_SIGNALING	1.5401	0.0008	GOBP_CELL_CYCLE_CHECKPOINT_SIGNALING	CELL CYCLE CHECKPOINT SIGNALING	Cell Cycle Regulation & Chromosome Organization
8	Cell Cycle Regulation & Chromosome Organization	2.88606	2.88606	2.88606	0.2702	0.022	DDR2|DUSP1|E2F7|ATF2|CCNA2|CCND1|EZH2|TCIM|ERCC2|ID2|TFAP4|TRIM71|UPF1|ZC3H12D|ARPP19|ZFP36L1|MIR15B|ZFP36L2|MIR16-1|CHEK2|MIR19B1|MIR221|MIR222|CRY1|E2F1|TFDP1|MAPK14|PTPN11|RAB11A|FOXO4|TAOK1|RCC2|TAOK2|TPD52L1|TGFB1|CDKN1C|PBX1|TRIM39|TMOD3|GPNMB|TMSB4X|PRAP1|ADAM17|CCND2|AKAP8|ATAD5|USH1C|USP28|VPS4A|AKAP8L|SPAST|BRD4|ATR|ATRIP|GIGYF2|BABAM1|BLM|ZNF16|BRIP1|CALM1|CDK4|ZNF830|CALM3|CEP63|CACNB…	570	GOBP_CELL_CYCLE_PHASE_TRANSITION	1.3427	0.0013	GOBP_CELL_CYCLE_PHASE_TRANSITION	CELL CYCLE PHASE TRANSITION	Cell Cycle Regulation & Chromosome Organization
8	Cell Cycle Regulation & Chromosome Organization	2.52288	2.52288	2.52288	0.3755	0.0355	NEK11|WAC|BRSK1|WDR76|XPC|ORC1|MAP3K20|FANCD2|ATF2|CCND1|DONSON|CDK5RAP3|DOT1L|CDKN1A|BRCA2|FOXN3|TREX1|DTL|CHEK1|CHEK2|CRY1|E2F1|EME1|EME2|MRE11|MUC1|MAPK14|TAOK3|ETAA1|FBXO6|PTPN11|NAE1|FEM1B|RAD1|RAD17|FOXO4|CUL4A|TAOK1|TAOK2|RAD51|FBXO4|PRPF19|RAD9B|BRCC3|LYN|DNA2|TRIM39|RFWD3|RHNO1|RINT1|H2AX|PARP9|RPA4|CLSPN|RNASEH2B|RPA2|CDT1|TP53|HINFP|UFL1|SDE2|CDK2|FBXO31|HUS1|FZR1|HUS1B|PLK1|USP28|BRD4…	124	GOBP_DNA_INTEGRITY_CHECKPOINT_SIGNALING	1.5412	0.003	GOBP_DNA_INTEGRITY_CHECKPOINT_SIGNALING	DNA INTEGRITY CHECKPOINT SIGNALING	Cell Cycle Regulation & Chromosome Organization
8	Cell Cycle Regulation & Chromosome Organization	2.4437	2.4437	2.4437	0.6346	0.0402	HUS1|HUS1B|RAD9A|MDC1|TICRR|NAE1|TIPIN|CDC45|DONSON|RAD17|CDC6|CLSPN|TIMELESS|TOPBP1|CAMSAP3|ORC1|RAD9B|CDT1|DNA2|ZNF830	20	GOBP_DNA_REPLICATION_CHECKPOINT_SIGNALING	1.77	0.0036	GOBP_DNA_REPLICATION_CHECKPOINT_SIGNALING	DNA REPLICATION CHECKPOINT SIGNALING	Cell Cycle Regulation & Chromosome Organization
8	Cell Cycle Regulation & Chromosome Organization	2.69897	2.69897	2.69897	0.2799	0.0283	DDR2|DUSP1|E2F7|CCNA2|CCND1|EZH2|ERCC2|ID2|TFAP4|TRIM71|ZC3H12D|ARPP19|ZFP36L1|MIR15B|ZFP36L2|MIR16-1|CHEK2|MIR19B1|MIR221|MIR222|E2F1|TFDP1|RAB11A|FOXO4|TAOK1|RCC2|TAOK2|TPD52L1|TGFB1|CDKN1C|PBX1|TRIM39|TMOD3|GPNMB|PRAP1|ADAM17|CCND2|ATAD5|USH1C|VPS4A|SPAST|BRD4|ATR|GIGYF2|BABAM1|BLM|CALM1|CDK4|ZNF830|CALM3|CACNB4|CACUL1|CCDC57|KLF4|CCNA1|CTDP1|CCNB2|CCNB3|PTEN|CCNE1|CCNE2|CCNF|CCNG1|CCNG2|CCNH|…	458	GOBP_MITOTIC_CELL_CYCLE_PHASE_TRANSITION	1.3664	0.002	GOBP_MITOTIC_CELL_CYCLE_PHASE_TRANSITION	MITOTIC CELL CYCLE PHASE TRANSITION	Cell Cycle Regulation & Chromosome Organization
8	Cell Cycle Regulation & Chromosome Organization	2.95861	2.95861	2.95861	0.2933	0.0201	DUSP1|E2F7|E2F8|ATF2|TAF6|CCND1|EZH2|TNKS|TENT5B|TFAP4|ETS1|ZC3H12D|ZFP36L1|MIR15B|ZFP36L2|ANGEL2|MIR16-1|CHEK2|MIR19B1|CRY1|E2F1|MAPK14|PML|PTPN11|FOXO4|TAOK1|TAOK2|TP53BP2|FZD3|RNF167|TGFB1|CDKN1C|TRIM35|TRIM39|GPNMB|SIRT1|TMSB4X|PRAP1|USP28|VPS4A|BRD4|ATR|ATRIP|AURKAIP1|GIGYF2|BABAM1|BAZ1B|BLM|HOXD10|BRINP2|BRIP1|HTRA2|BTG3|ZNF830|KAT2A|CEP63|ATRX|CACNB4|KLF4|EIF2AK4|GPER1|KAT2B|PTEN|CCNF|NHER…	398	GOBP_NEGATIVE_REGULATION_OF_CELL_CYCLE	1.387	0.0011	GOBP_NEGATIVE_REGULATION_OF_CELL_CYCLE	NEGATIVE REGULATION OF CELL CYCLE	Cell Cycle Regulation & Chromosome Organization
8	Cell Cycle Regulation & Chromosome Organization	2.95861	2.95861	2.95861	0.3151	0.0195	NEK11|BUB1|BUB1B|NUBP1|DUSP1|E2F7|E2F8|ORC1|OVOL1|PABIR1|PDIK1L|ATF2|CCND1|EZH2|PINX1|TNKS|PKMYT1|CDK5RAP3|CDKN1A|CDKN2D|BRCA2|ZC3H12D|ZFP36L1|CHEK1|MIR15B|PPP2R5B|ZFP36L2|MIR16-1|CHEK2|MIR19B1|BRD7|CRY1|E2F1|PRP4K|TERF2|MAPK14|PTPN11|FBXO5|HORMAD1|FEM1B|RAD1|RAD17|FOXO4|CUL4A|TAOK1|TAOK2|RAD50|RAD51|BCL2|BCL6|DCUN1D3|PRPF19|RAD9B|RBBP8|LYN|RBL1|RBL2|MOS|TRIM39|RFWD3|RHNO1|GPNMB|NSUN2|RINT1|SIRT1…	317	GOBP_NEGATIVE_REGULATION_OF_CELL_CYCLE_PROCESS	1.4464	0.0011	GOBP_NEGATIVE_REGULATION_OF_CELL_CYCLE_PROCESS	NEGATIVE REGULATION OF CELL CYCLE PROCESS	Cell Cycle Regulation & Chromosome Organization
8	Cell Cycle Regulation & Chromosome Organization	2.67778	2.67778	2.67778	0.328	0.0292	NEK11|MIR134|BUB1|BUB1B|DUSP1|E2F7|ORC1|OVOL1|PABIR1|YTHDC2|PDIK1L|ATF2|CCND1|EZH2|PINX1|PKMYT1|CDK5RAP3|CDKN1A|CDKN1B|CDKN2D|ZC3H12D|ZFP36L1|CHEK1|MIR15B|ZFP36L2|ANGEL2|MIR16-1|CHEK2|MIR19B1|BRD7|PRP4K|PML|FBXO5|RAD17|FOXO4|TAOK1|TAOK2|RAD50|BCL2|FZD3|BCL6|DCUN1D3|CDKN1C|RAD9B|RBBP8|RBL1|RBL2|TRIM35|TRIM39|RFWD3|GPNMB|RINT1|MIR133B|PRAP1|SDE2|VPS4A|SETMAR|TRIP13|ATR|AURKAIP1|GIGYF2|APC|BABAM1|BL…	245	GOBP_NEGATIVE_REGULATION_OF_MITOTIC_CELL_CYCLE	1.4423	0.0021	GOBP_NEGATIVE_REGULATION_OF_MITOTIC_CELL_CYCLE	NEGATIVE REGULATION OF MITOTIC CELL CYCLE	Cell Cycle Regulation & Chromosome Organization
8	Cell Cycle Regulation & Chromosome Organization	2.92082	2.92082	2.92082	0.2826	0.021	DDR2|DUSP1|E2F7|ATF2|CCND1|EZH2|TCIM|ERCC2|ID2|TFAP4|ZC3H12D|ZFP36L1|MIR15B|ZFP36L2|MIR16-1|CHEK2|MIR19B1|MIR221|MIR222|CRY1|E2F1|TFDP1|MAPK14|PTPN11|RAB11A|FOXO4|TAOK1|RCC2|TAOK2|TGFB1|CDKN1C|PBX1|TRIM39|TMOD3|GPNMB|TMSB4X|PRAP1|ADAM17|CCND2|ATAD5|USP28|VPS4A|BRD4|ATR|ATRIP|GIGYF2|BABAM1|BLM|ZNF16|BRIP1|CDK4|ZNF830|CEP63|CACNB4|KLF4|EIF2AK4|PTEN|CCNE1|CCNE2|CCNH|CCNQ|CDC14A|CDC14B|CDC14C|CDC25A|…	467	GOBP_REGULATION_OF_CELL_CYCLE_PHASE_TRANSITION	1.376	0.0012	GOBP_REGULATION_OF_CELL_CYCLE_PHASE_TRANSITION	REGULATION OF CELL CYCLE PHASE TRANSITION	Cell Cycle Regulation & Chromosome Organization
8	Cell Cycle Regulation & Chromosome Organization	3.69897	3.69897	3.69897	0.2926	0.0071	DDR2|USP2|EDN3|DUSP1|SDCBP|E2F7|ATF2|CCND1|EPGN|EZH2|ERCC2|EREG|ID2|TFAP4|LRP5|ZC3H12D|ZFP36L1|MIR15B|ZFP36L2|ANGEL2|MIR16-1|CHEK2|MIR19B1|MIR221|MIR222|E2F1|SIK1|TFDP1|PKN2|PML|FOXA1|PTPN11|RAB11A|FOXO4|TAOK1|RCC2|TAOK2|FZD3|TGFB1|ASCL1|CDKN1C|INSR|PBX1|TRIM35|TRIM39|TMOD3|GPNMB|SIRT1|PRAP1|ADAM17|CCND2|ATAD5|AFAP1L2|VPS4A|BRD4|ATR|AURKAIP1|GIGYF2|BABAM1|BLM|BORA|BRINP2|ZNF268|BTG3|CDK4|ZNF830|C…	528	GOBP_REGULATION_OF_MITOTIC_CELL_CYCLE	1.4364	0.0002	GOBP_REGULATION_OF_MITOTIC_CELL_CYCLE	REGULATION OF MITOTIC CELL CYCLE	Cell Cycle Regulation & Chromosome Organization
8	Cell Cycle Regulation & Chromosome Organization	2.34679	2.34679	2.34679	0.2875	0.0463	NEK11|DDR2|BUB1|BUB1B|NSMCE2|VPS4B|DUSP1|E2F7|ORC1|ANLN|PABIR1|ANXA1|PDIK1L|ACTL6B|CCND1|EZH2|PINX1|AURKA|ERCC2|ID2|PKMYT1|TFAP4|CDK5RAP3|CDKN1A|PLRG1|CDKN1B|CDKN2D|ZC3H12D|ZFP36L1|CHEK1|MIR15B|ZFP36L2|MIR16-1|ARID1A|MIR19B1|ARID1B|MIR221|BRD7|MIR222|CCND3|CYP1A1|E2F1|PRP4K|CDC25B|TFDP1|PSME2|PTENP1-AS|FBXO5|RAB11A|RAD17|FOXO4|CUL4A|TAOK1|RCC2|TAOK2|RAD50|BCL2|NPM2|RAD51C|TGFB1|DCUN1D3|CDKN1C|DDB…	358	GOBP_REGULATION_OF_MITOTIC_CELL_CYCLE_PHASE_TRANSITION	1.3509	0.0045	GOBP_REGULATION_OF_MITOTIC_CELL_CYCLE_PHASE_TRANSITION	REGULATION OF MITOTIC CELL CYCLE PHASE TRANSITION	Cell Cycle Regulation & Chromosome Organization
2	Cell Cycle Regulation, Chromosome Organization and Kinetochore & Centromere Assembly	3.39794	3.39794	3.39794	0.4154	0.0115	ACTR2|ACTR3|VPS4B|NUDC|MAP1S|NUMA1|DCTN2|ZWINT|KNL1|PINX1|DLGAP5|KASH5|CHMP3|NDEL1|EML3|PSRC1|RAB11A|AURKB|FAM83D|RCC2|BECN1|GEM|NUP62|SIRT1|UBE2B|RAB24|RRS1|KIF14|BOD1|CDCA8|CDT1|KAT5|PIBF1|CDC42|CENPC|CENPE|CHAMP1|CDC23|INCENP|KIF2C|MAD1L1|SEPTIN1|MAPRE1|MIS12|NDC80|IFFO1|NUF2|RMDN1|VPS4A|SEH1L|SKA1|SKA2|SKA3|ABRAXAS1|ABRAXAS2|ANKRD53|AURKC|BUB3|DSN1|EML4|KNSTRN|KNTC1|NEK2|NSL1|APC|PMF1|SGO1|SP…	127	GOBP_CHROMOSOME_LOCALIZATION	1.6942	0.0004	GOBP_CHROMOSOME_LOCALIZATION	CHROMOSOME LOCALIZATION	Cell Cycle Regulation, Chromosome Organization and Kinetochore & Centromere Assembly
2	Cell Cycle Regulation, Chromosome Organization and Kinetochore & Centromere Assembly	3.09691	3.09691	3.09691	0.2729	0.0162	CENPV|DUSP1|UCHL5|CIP2A|DCLRE1B|HSP90AB1|YY1|SYCE3|EID3|DHX36|HNRNPD|TNKS|TNKS2|TEX11|EXOSC10|HMGA2|PCNA|PUM2|TFPT|TOP1|UPF1|SRC|CHEK2|CCT2|CCT3|CCT4|CCT5|HNRNPC|CCT7|CCT8|PML|RAB11A|TCP1|TENT4A|KAT6A|TENT4B|H2BC1|SIRT7|MSH3|OFD1|SIRT1|UBE2B|NSMCE1|NSMCE4A|PRAP1|FSHR|KIF3B|KIF4A|HHEX|AKAP8|ACTR5|ACTR8|VPS4A|PRM3|AKAP8L|POT1|ANKRD31|ANKRD53|EHMT2|ATR|XPA|BAZ1B|BCCIP|BLM|RECQL4|RFC1|BRIP1|ZNF830|AC…	588	GOBP_CHROMOSOME_ORGANIZATION	1.3458	0.0008	GOBP_CHROMOSOME_ORGANIZATION	CHROMOSOME ORGANIZATION	Cell Cycle Regulation, Chromosome Organization and Kinetochore & Centromere Assembly
2	Cell Cycle Regulation, Chromosome Organization and Kinetochore & Centromere Assembly	4	4	4	0.3183	0.0012	DUSP1|SYCE3|CSNK2A2|TNKS|TEX11|ERCC2|PUM1|PUM2|MAPRE2|TOP1|CHEK2|MTCL2|RAB11A|TENT4A|RCC2|SIRT7|NR3C1|OFD1|SIRT1|UBE2B|ARL8A|ARL8B|PRAP1|KIF3B|KIF4A|AKAP8|VPS4A|AKAP8L|ANKRD31|ANKRD53|EHMT2|WASHC5|BAZ1B|BCCIP|BEX4|BRIP1|C14ORF39|C1ORF146|CEP192|CEP63|C9ORF78|CCDC61|CCDC66|CCDC69|KAT2B|CCNB2|PTEN|CCNE1|CCNE2|CCSAP|CDC6|CDCA2|CDCA5|CDK5RAP2|AAAS|CENATAC|CENPF|CENPH|CENPI|CENPK|CENPL|CCNB1|CENPM|CDK…	438	GOBP_CHROMOSOME_SEGREGATION	1.5498	0	GOBP_CHROMOSOME_SEGREGATION	CHROMOSOME SEGREGATION	Cell Cycle Regulation, Chromosome Organization and Kinetochore & Centromere Assembly
2	Cell Cycle Regulation, Chromosome Organization and Kinetochore & Centromere Assembly	2.65758	2.65758	2.65758	0.5021	0.0292	ANKLE1|ANKRD31|TRIP13|SHOC1|CNTD1|SLX4|BRIP1|BRME1|SPO11|SYCE3|FANCD2|C14ORF39|C1ORF146|HDAC10|MLH1|KLHDC3|TEX11|NBN|ATM|SYCP1|PRDM9|BRCA1|MAJIN|EME1|EME2|TERB1|MRE11|TERB2|PSMC3IP|TOP2B|ERCC4|UBR2|DMC1|TEX19|RAD21|CCNB1IP1|MCMDC2|MEIOB|RAD50|FANCM|RAD51|RAD51AP1|RAD51C|RAD51D|TOP6BL|RAD54B|TOPBP1|RAD54L|RAD51B|RBBP8|MLH3|MND1|MSH4|MSH5|NUCKS1|UBE2B|BARD1|RNF212|MUS81|RNF212B|CENPS|CENPX|REC8|RMI…	68	GOBP_HOMOLOGOUS_RECOMBINATION	1.7283	0.0022	GOBP_HOMOLOGOUS_RECOMBINATION	HOMOLOGOUS RECOMBINATION	Cell Cycle Regulation, Chromosome Organization and Kinetochore & Centromere Assembly
2	Cell Cycle Regulation, Chromosome Organization and Kinetochore & Centromere Assembly	3.30103	3.30103	3.30103	0.4918	0.0128	CHFR|ACTR2|ACTR3|MAEL|ZCWPW1|DCAF13|SYCE3|FANCD2|MAPK15|ZWINT|KNL1|ASPM|AURKA|TEX11|GOLGA2|KASH5|MRE11|PSMC3IP|DMC1|PTTG1|PTTG2|PTTG3P|FBXO5|HORMAD1|BAG6|DDB1|SIRT7|MOS|UBE2B|RNF212|RNF212B|NCAPH2|PPP2R1A|REC8|CENPC|SEPTIN1|NDC80|NUF2|PLK1|IHO1|SKA1|SKA2|SKA3|ANKRD31|EHMT2|TRIP13|SHOC1|WASHC5|TUBB8|SGO1|SMC2|SMC4|ESPL1|SPATA22|BRIP1|SPDYA|SPO11|STAG3|C14ORF39|C1ORF146|P3H4|MLH1|C9ORF78|SUN1|SYCE1…	97	GOBP_MEIOTIC_CHROMOSOME_SEGREGATION	1.7904	0.0005	GOBP_MEIOTIC_CHROMOSOME_SEGREGATION	MEIOTIC CHROMOSOME SEGREGATION	Cell Cycle Regulation, Chromosome Organization and Kinetochore & Centromere Assembly
2	Cell Cycle Regulation, Chromosome Organization and Kinetochore & Centromere Assembly	2.72125	2.72125	2.72125	0.3904	0.0282	VPS4B|NUDC|MAP1S|NUMA1|DCTN2|ZWINT|KNL1|PINX1|CHMP3|EML3|PSRC1|RAB11A|AURKB|FAM83D|RCC2|BECN1|GEM|NUP62|SIRT1|RAB24|RRS1|KIF14|BOD1|CDCA8|CDT1|KAT5|PIBF1|CDC42|CENPC|CENPE|CHAMP1|CDC23|INCENP|KIF2C|MAD1L1|SEPTIN1|MAPRE1|MIS12|NDC80|NUF2|RMDN1|VPS4A|SEH1L|SKA1|SKA2|SKA3|ABRAXAS1|ABRAXAS2|ANKRD53|AURKC|BUB3|DSN1|EML4|KNSTRN|KNTC1|NEK2|NSL1|APC|PMF1|SGO1|SPAG5|SPC24|SPC25|TEX14|ZNF207|ZW10|SPDL1|ZWI…	107	GOBP_METAPHASE_CHROMOSOME_ALIGNMENT	1.5776	0.0019	GOBP_METAPHASE_CHROMOSOME_ALIGNMENT	METAPHASE CHROMOSOME ALIGNMENT	Cell Cycle Regulation, Chromosome Organization and Kinetochore & Centromere Assembly
2	Cell Cycle Regulation, Chromosome Organization and Kinetochore & Centromere Assembly	2.76955	2.76955	2.76955	0.3542	0.0257	VPS4B|CKAP5|NUDC|UBXN2B|WDR62|HSPA1A|HSPA1B|WRAP73|NUSAP1|MAP1S|CENPJ|INPPL1|NUMA1|ILK|PCNT|DCTN2|FBXW11|DCTN6|TNKS|PAFAH1B1|AURKA|DLGAP5|GOLGA2|DRG1|ARHGEF10|CHMP3|SBDS|CHEK2|EFHC1|PRC1|DCTN1|NDEL1|EML1|EML3|ENKD1|STMN1|PSRC1|PAX6|FAM110A|NEK6|RAB11A|AURKB|DYNLT1|LSM14A|RAE1|PLK2|FSD1|RCC1|NUP62|FLNA|GPSM1|OFD1|GPSM2|POLDIP2|PRICKLE1|VCP|CDCA8|HTT|KIF3B|KAT5|KIF4A|PIBF1|SASS6|CDC20|CENPE|INCENP|…	172	GOBP_MICROTUBULE_CYTOSKELETON_ORGANIZATION_INVOLVED_IN_MITOSIS	1.5238	0.0017	GOBP_MICROTUBULE_CYTOSKELETON_ORGANIZATION_INVOLVED_IN_MITOSIS	MICROTUBULE CYTOSKELETON ORGANIZATION INVOLVED IN MITOSIS	Cell Cycle Regulation, Chromosome Organization and Kinetochore & Centromere Assembly
2	Cell Cycle Regulation, Chromosome Organization and Kinetochore & Centromere Assembly	3.69897	3.69897	3.69897	0.3312	0.0063	BTC|BUB1|BUB1B|EDN3|NSMCE2|VPS4B|NUDC|UBXN2B|DUSP1|HSPA1A|HSPA1B|NUSAP1|ANLN|EPGN|IL1B|PHF13|PINX1|AURKA|EREG|PKMYT1|CDKN1B|LRP5|ARHGEF10|PPP2R2D|CHEK1|CHMP3|CHEK2|PRC1|PRP4K|NDEL1|PSRC1|FBXO5|RAB11A|TENT4A|NCAPG2|NPM2|TGFB1|PPP1CC|CDKN1C|LSM14A|RANBP1|INSR|RCC1|REEP3|REEP4|OFD1|SIRT1|NCAPH2|PPP2R1A|PRAP1|NFE2L1|RRS1|CUL7|KIF3B|KIF4A|CDC42|AKAP8|VPS4A|AKAP8L|SPAST|ANKRD53|CLASP1|SH2B1|CLASP2|TRIP…	286	GOBP_MITOTIC_NUCLEAR_DIVISION	1.5221	0.0002	GOBP_MITOTIC_NUCLEAR_DIVISION	MITOTIC NUCLEAR DIVISION	Cell Cycle Regulation, Chromosome Organization and Kinetochore & Centromere Assembly
2	Cell Cycle Regulation, Chromosome Organization and Kinetochore & Centromere Assembly	3.04576	3.04576	3.04576	0.3455	0.0177	BUB1|BUB1B|NSMCE2|VPS4B|NUDC|DUSP1|HSPA1A|HSPA1B|NUSAP1|PHF13|PINX1|ARHGEF10|CHMP3|CHEK2|PRC1|PRP4K|PSRC1|FBXO5|RAB11A|TENT4A|NCAPG2|PPP1CC|LSM14A|RCC1|OFD1|SIRT1|NCAPH2|PPP2R1A|PRAP1|RRS1|KIF3B|KIF4A|AKAP8|VPS4A|AKAP8L|ANKRD53|CLASP1|CLASP2|TRIP13|APC|SMC1A|BAZ1B|BCCIP|SMC2|SMC3|SMC4|ESPL1|SPDL1|SPICE1|STAG1|STAG2|CEP192|CUL3|CCDC61|CCDC66|KAT2B|HNRNPU|CCSAP|CDCA5|TPR|CDK5RAP2|AAAS|TTK|RB1|CENPF…	197	GOBP_MITOTIC_SISTER_CHROMATID_SEGREGATION	1.5121	0.0009	GOBP_MITOTIC_SISTER_CHROMATID_SEGREGATION	MITOTIC SISTER CHROMATID SEGREGATION	Cell Cycle Regulation, Chromosome Organization and Kinetochore & Centromere Assembly
2	Cell Cycle Regulation, Chromosome Organization and Kinetochore & Centromere Assembly	4	4	4	0.3583	0.0009	ACTR2|ACTR3|BUB1|BUB1B|NSMCE2|VPS4B|NUDC|DUSP1|HSPA1A|HSPA1B|NUSAP1|SYCE3|MAPK15|ACTL6B|PHF13|PINX1|AURKA|TEX11|ARHGEF10|CHMP3|ARID1A|CHEK2|PRC1|ARID1B|BRD7|PRP4K|PSMC3IP|DMC1|PSRC1|PTTG1|PTTG2|PTTG3P|FBXO5|HORMAD1|RAB11A|TENT4A|RCC2|NCAPG2|PPP1CC|DDB1|LSM14A|SIRT7|RCC1|MOS|OFD1|RIOK2|RMI2|SIRT1|UBE2B|RNF212|RNF212B|NCAPH2|PPP2R1A|PRAP1|RAB24|DPF1|REC8|DPF2|PBRM1|RRS1|PHF10|KIF3B|KIF4A|CDC42|AKAP…	328	GOBP_NUCLEAR_CHROMOSOME_SEGREGATION	1.6637	0	GOBP_NUCLEAR_CHROMOSOME_SEGREGATION	NUCLEAR CHROMOSOME SEGREGATION	Cell Cycle Regulation, Chromosome Organization and Kinetochore & Centromere Assembly
2	Cell Cycle Regulation, Chromosome Organization and Kinetochore & Centromere Assembly	4	4	4	0.2986	0.0042	EDN3|DUSP1|ACOT8|SYCE3|EPGN|TEX11|EREG|SPIRE1|SPIRE2|LRP5|CHEK2|PPARG|DAZL|UBB|FOXJ2|RAB11A|TENT4A|SLC25A31|TGFB1|CDKN1C|INSR|SIRT7|OFD1|SIRT1|UBE2B|PRAP1|WNT5A|KIF3B|KIF4A|AKAP8|VPS4A|AKAP8L|SPAST|ANKLE1|CRYZL2P-SEC16B|ANKRD31|ANKRD53|EHMT2|ASZ1|WASHC5|AURKAIP1|WNT4|BAZ1B|BCCIP|BORA|BRDT|BRIP1|BRME1|BROX|BTBD18|C14ORF39|C1ORF146|CEP192|C9ORF78|KDR|KIF20B|CCDC61|CCDC66|DRD3|CCDC8|CCNA1|CTDP1|KAT2…	510	GOBP_ORGANELLE_FISSION	1.4548	0.0001	GOBP_ORGANELLE_FISSION	ORGANELLE FISSION	Cell Cycle Regulation, Chromosome Organization and Kinetochore & Centromere Assembly
2	Cell Cycle Regulation, Chromosome Organization and Kinetochore & Centromere Assembly	4	4	4	0.6409	0.0042	SKA1|SKA3|AURKB|CDC6|RAD18|RCC2|NCAPG2|BECN1|SMC2|SMC4|NUMA1|CCNB1|CDK1|NCAPH2|PRAP1|SIRT2|KAT2B|MAD2L1BP|CDCA8|HNRNPU|KAT5|NCAPD2|NCAPD3|SMC5|BIRC5|NCAPG|SMC6|NCAPH|INCENP|MAD1L1	30	GOBP_POSITIVE_REGULATION_OF_CHROMOSOME_SEGREGATION	1.9993	0.0001	GOBP_POSITIVE_REGULATION_OF_CHROMOSOME_SEGREGATION	POSITIVE REGULATION OF CHROMOSOME SEGREGATION	Cell Cycle Regulation, Chromosome Organization and Kinetochore & Centromere Assembly
2	Cell Cycle Regulation, Chromosome Organization and Kinetochore & Centromere Assembly	2.46852	2.46852	2.46852	0.5411	0.0384	UBE2C|SKA1|NSMCE2|SKA3|AURKB|NCAPG2|SMC2|SMC4|ESPL1|NUMA1|MAPK15|RB1|CUL3|DLGAP5|NCAPH2|PRAP1|ANAPC11|PLSCR1|MAD2L1BP|ANAPC5|CDCA8|ANAPC7|NCAPD2|CDC16|NCAPD3|BIRC5|CDC20|NCAPG|NCAPH|CDC23|INCENP|MAD1L1	32	GOBP_POSITIVE_REGULATION_OF_CHROMOSOME_SEPARATION	1.7044	0.0034	GOBP_POSITIVE_REGULATION_OF_CHROMOSOME_SEPARATION	POSITIVE REGULATION OF CHROMOSOME SEPARATION	Cell Cycle Regulation, Chromosome Organization and Kinetochore & Centromere Assembly
2	Cell Cycle Regulation, Chromosome Organization and Kinetochore & Centromere Assembly	4	4	4	0.6847	0.0032	ECT2|RACGAP1|SIRT1|CCNB1|CDK1|AURKB|KNSTRN|KNTC1|RCC2|SIRT2|NEK2|KAT2B|APC|BECN1|SPAG5|CDCA8|HNRNPU|KAT5|CDC42|ZW10|BIRC5|ZWILCH|INCENP	23	GOBP_REGULATION_OF_ATTACHMENT_OF_SPINDLE_MICROTUBULES_TO_KINETOCHORE	2.0322	0.0001	GOBP_REGULATION_OF_ATTACHMENT_OF_SPINDLE_MICROTUBULES_TO_KINETOCHORE	REGULATION OF ATTACHMENT OF SPINDLE MICROTUBULES TO KINETOCHORE	Cell Cycle Regulation, Chromosome Organization and Kinetochore & Centromere Assembly
2	Cell Cycle Regulation, Chromosome Organization and Kinetochore & Centromere Assembly	2.60206	2.60206	2.60206	0.3168	0.0318	CENPV|NFRKB|BUB1|BUB1B|NSMCE2|HSP90AA1|DUSP1|UCHL5|USP7|YY1|EID3|MAPK15|ACTL6B|DHX36|HNRNPD|PINX1|TNKS|TNKS2|EXOSC10|TFPT|UPF1|SRC|ARID1A|ARID1B|BRD7|PRP4K|TERF2|CCT2|CCT3|CCT4|CCT5|HNRNPC|CCT7|CCT8|PIF1|PML|FBXO5|TCP1|TENT4B|RAD50|NCAPG2|H3-3A|H3-3B|MAPK1|MOS|RIOK2|RMI2|SIRT1|NSMCE1|RNF4|NSMCE4A|NCAPH2|PRAP1|DPF1|DPF2|PBRM1|PHF10|RTEL1|FSHR|SENP6|SMARCA2|ACTR5|SMARCC2|ACTR8|NEK7|SMARCD1|SMARCD2|…	244	GOBP_REGULATION_OF_CHROMOSOME_ORGANIZATION	1.4273	0.0025	GOBP_REGULATION_OF_CHROMOSOME_ORGANIZATION	REGULATION OF CHROMOSOME ORGANIZATION	Cell Cycle Regulation, Chromosome Organization and Kinetochore & Centromere Assembly
2	Cell Cycle Regulation, Chromosome Organization and Kinetochore & Centromere Assembly	3.04576	3.04576	3.04576	0.3955	0.0172	LCMT1|CHFR|BUB1|BUB1B|NSMCE2|DUSP1|XRCC3|NUMA1|MAP3K20|MAPK15|ZWINT|ACTL6B|CSNK2A2|KNL1|DLGAP5|PUM1|PUM2|DPF3|PPP2R2A|DYNC1LI1|PPP2R2D|USP44|ARID1A|ARID1B|BRD7|PRP4K|ENSG00000266560|MAD2L2|FBXO5|HORMAD1|NEK6|AURKB|RAD18|RCC2|NCAPG2|BECN1|GEN1|MOS|RIOK2|RMI2|SIRT1|HASPIN|NCAPH2|ANAPC1|PRAP1|ANAPC11|DPF1|DPF2|PBRM1|ANAPC15|PHF10|ANAPC2|CSNK2A1|ANAPC4|HECW2|ANAPC5|CDCA8|ANAPC7|KAT5|CDC16|CDC20|CENPE…	134	GOBP_REGULATION_OF_CHROMOSOME_SEGREGATION	1.653	0.0009	GOBP_REGULATION_OF_CHROMOSOME_SEGREGATION	REGULATION OF CHROMOSOME SEGREGATION	Cell Cycle Regulation, Chromosome Organization and Kinetochore & Centromere Assembly
2	Cell Cycle Regulation, Chromosome Organization and Kinetochore & Centromere Assembly	2.74473	2.74473	2.74473	0.7014	0.0274	TTL|DYNC1H1|SIRT1|CDK1|AURKB|KAT2B|BECN1|SPAG5|CDCA8|HNRNPU|KAT5|NUMA1|BIRC5|INCENP|MAD1L1	15	GOBP_REGULATION_OF_METAPHASE_PLATE_CONGRESSION	1.8757	0.0018	GOBP_REGULATION_OF_METAPHASE_PLATE_CONGRESSION	REGULATION OF METAPHASE PLATE CONGRESSION	Cell Cycle Regulation, Chromosome Organization and Kinetochore & Centromere Assembly
2	Cell Cycle Regulation, Chromosome Organization and Kinetochore & Centromere Assembly	2.37675	2.37675	2.37675	0.3894	0.0444	LCMT1|FGF8|IGF1|BTC|IGF2|BUB1|BUB1B|EDN3|NSMCE2|DUSP1|NUSAP1|XRCC3|CUL9|ZWINT|EPGN|IL1B|KNL1|AURKA|DLGAP5|EREG|PKMYT1|LRP5|DYNC1LI1|CHEK1|USP44|PRP4K|MAD2L2|FBXO5|HOXA13|AURKB|PIN1|FBXO43|FBXW5|NME6|INSR|RCC1|GEN1|NUP62|HASPIN|PRAP1|SMPD3|ANAPC11|ANAPC15|NFE2L1|CUL7|ANAPC5|CDCA8|ANAPC7|CAV2|CDC16|CDC42|CDC20|PHIP|CDC23|INCENP|MAD1L1|TOM1L1|NDC80|NUF2|PLK1|UBE2C|IK|SKA1|SKA3|BUB3|SH2B1|CD28|TRIP13…	120	GOBP_REGULATION_OF_MITOTIC_NUCLEAR_DIVISION	1.5819	0.0042	GOBP_REGULATION_OF_MITOTIC_NUCLEAR_DIVISION	REGULATION OF MITOTIC NUCLEAR DIVISION	Cell Cycle Regulation, Chromosome Organization and Kinetochore & Centromere Assembly
2	Cell Cycle Regulation, Chromosome Organization and Kinetochore & Centromere Assembly	2.60206	2.60206	2.60206	0.3942	0.0313	LCMT1|CHFR|BUB1|BUB1B|NSMCE2|DUSP1|XRCC3|NUMA1|MAP3K20|MAPK15|ZWINT|ACTL6B|KNL1|DLGAP5|DPF3|DYNC1LI1|USP44|ARID1A|ARID1B|BRD7|PRP4K|MAD2L2|FBXO5|NEK6|AURKB|BECN1|GEN1|MOS|RIOK2|RMI2|SIRT1|HASPIN|ANAPC1|PRAP1|ANAPC11|DPF1|DPF2|PBRM1|ANAPC15|PHF10|ANAPC2|ANAPC4|HECW2|ANAPC5|CDCA8|ANAPC7|KAT5|CDC16|CDC20|CENPE|CDC23|INCENP|CDC27|MAD1L1|SMARCA2|NDC80|SMARCC2|NUF2|PLK1|SMARCD1|SMARCD2|UBE2C|IK|SMARCE1…	107	GOBP_REGULATION_OF_SISTER_CHROMATID_SEGREGATION	1.5959	0.0025	GOBP_REGULATION_OF_SISTER_CHROMATID_SEGREGATION	REGULATION OF SISTER CHROMATID SEGREGATION	Cell Cycle Regulation, Chromosome Organization and Kinetochore & Centromere Assembly
2	Cell Cycle Regulation, Chromosome Organization and Kinetochore & Centromere Assembly	4	4	4	0.3564	0.0029	BUB1|BUB1B|NSMCE2|VPS4B|NUDC|DUSP1|HSPA1A|HSPA1B|NUSAP1|MAPK15|ACTL6B|PHF13|PINX1|ARHGEF10|CHMP3|ARID1A|CHEK2|PRC1|ARID1B|BRD7|PRP4K|PSRC1|FBXO5|RAB11A|TENT4A|NCAPG2|PPP1CC|LSM14A|RCC1|MOS|OFD1|RIOK2|RMI2|SIRT1|NCAPH2|PPP2R1A|PRAP1|DPF1|DPF2|PBRM1|RRS1|PHF10|KIF3B|KIF4A|AKAP8|SMARCA2|SMARCC2|SMARCD1|SMARCD2|VPS4A|SMARCE1|AKAP8L|ANKRD53|CLASP1|CLASP2|TRIP13|APC|SMC1A|BAZ1B|BCCIP|SMC2|SMC3|SMC4|ESP…	238	GOBP_SISTER_CHROMATID_SEGREGATION	1.5995	0.0001	GOBP_SISTER_CHROMATID_SEGREGATION	SISTER CHROMATID SEGREGATION	Cell Cycle Regulation, Chromosome Organization and Kinetochore & Centromere Assembly
25	Cell fate commitment	4	4	4	0.4505	0.0001	DKK1|SPN|STAT3|DLL4|MBD3|ERBB4|SPDEF|WNT1|WNT16|WNT2|SFRP1|WNT2B|VSX2|WNT3|WNT3A|WNT6|WNT10A|WNT7A|WNT7B|WNT8A|WNT9A|WNT9B|ELF5|ISL1|SMAD4|ID2|IFRD1|IRF4|WNT5B|WNT8B|ETS2|MESP1|EYA1|EYA2|MIR19B1|PPARG|ARHGEF2|MCL1|MTA2|SOX8|FGFR2|PML|FOXA1|LATS2|ARX|FEV|ATOH7|BCL2|FGFR1|ASCL1|FZD7|TGFB2|FEZF2|TGFBR1|BRAF|GATA1|GATA5|GATA6|GCM1|GDF3|GLI2|NR2F2|WNT11|WT1|TM2D3|SMO|MEF2C|GSC|SOX17|SOX9|TNXB|HDAC1|TB…	302	GOBP_CELL_FATE_COMMITMENT	1.9349	0	GOBP_CELL_FATE_COMMITMENT	CELL FATE COMMITMENT	Cell fate commitment
25	Cell fate commitment	4	4	4	0.6119	0.0001	DKK1|CHD3|FGF2|MBD3|CTNNB1|LHX3|SOX2|WNT3A|ISL1|POU3F2|NANOG|DBX1|NKX2-2|SMAD4|MNX1|NFIB|FOXI3|APC2|MESP1|EYA1|EYA2|MTA2|GSX2|FOXA1|PAX6|FEV|HOXA13|CHD4|DMRTA2|ESRP1|FGFR1|GATAD2A|ASCL1|FZD7|GATAD2B|MGA|MYT1L|PTCH2|RBBP4|RBBP7|TBX10|TBX22|TLX3|GLI2|MYL2|SMO|POU5F1|GSC|PRDM14|SOX17|SOX9|HDAC1|TBX1|PTCH1|ISL2|GLI3|IHH|HOXA11|BMPR1A|DLL1|DMRT3|EHMT2|NKX2-3|NRP1|PAX2|FOXA2|APC|HDAC2|HOXD10|SFRP2|OLIG…	111	GOBP_CELL_FATE_SPECIFICATION	2.2462	0	GOBP_CELL_FATE_SPECIFICATION	CELL FATE SPECIFICATION	Cell fate commitment
25	Cell fate commitment	4	4	4	0.653	0.0018	DLL4|GATA2|DLL1|DMRT3|GSX1|CTNNB1|EHMT2|LHX3|PROX1|GBX1|WNT1|ZDHHC16|HOXD10|ISL1|OLIG1|POU3F2|OLIG2|OLIG3|SIX1|DBX1|PAX7|NKX2-2|SMAD4|MNX1|FOXG1|ID2|NFIB|SHH|NOTCH1|FKBP8|NKX2-1|NOTCH3|EYA1|HOXC10|POU4F1|NFIA|LMO4|PRRX1|GSX2|SUFU|FOXA1|PAX6|NKX6-2|ARX|FEV|TBR1|ATOH7|DMRTA2|EPOP|ESRP1|ASCL1|TGFB2|FEZF2|MYT1L|TGFBR1|MIR125A|TLX3|ATOH1|ZNF521|GLI2|TFAP2C|NTRK3|RBPJ|SOX1|JAG2|DLX1|SOX9|DLX2|FOXN4|LBX…	77	GOBP_NEURON_FATE_COMMITMENT	2.1182	0	GOBP_NEURON_FATE_COMMITMENT	NEURON FATE COMMITMENT	Cell fate commitment
25	Cell fate commitment	2.82391	2.82391	2.82391	0.7068	0.0243	GSX2|SUFU|DLL1|DMRT3|FOXA1|EHMT2|LHX3|FEV|DMRTA2|ESRP1|ASCL1|MYT1L|HOXD10|MIR125A|TLX3|ATOH1|ISL1|GLI2|POU3F2|OLIG3|SIX1|NTRK3|DBX1|NKX2-2|SMAD4|MNX1|SOX1|NFIB|SOX9|FKBP8|ISL2|EYA1|GLI3|HOXC10|POU4F1|NFIA|LMO4	37	GOBP_NEURON_FATE_SPECIFICATION	1.8901	0.0015	GOBP_NEURON_FATE_SPECIFICATION	NEURON FATE SPECIFICATION	Cell fate commitment
34	Cell Polarity & Spindle Localization	2.42022	2.42022	2.42022	0.3477	0.0416	CRB2|STK11|ROCK2|RUFY3|BRSK1|CYP26B1|HES1|UBXN2B|CDH5|WEE1|IFT20|FERMT1|AMOT|AMOTL1|SH3BP1|AMOTL2|INPPL1|WNT7A|MARK2|NUMA1|SCRIB|FBXW11|JAM3|EPHB1|ARF6|KANK1|ARFGEF1|PAFAH1B1|PARD3B|CCDC85C|ARHGEF11|DCTN1|NDEL1|LLGL1|LLGL2|ENKD1|RAP1B|PAX6|FOXF1|FAM89B|SYNE4|DYNLT1|BRSK2|FBF1|DIAPH3|MOS|MPP7|PARD3|GPSM1|GPSM2|MYO18A|PRICKLE1|LAMA1|DOCK8|FEZ1|CCL21|FRMD4A|HES5|FRMD4B|WDPCP|CCR7|WNT5A|HTT|KAT5|CDC4…	165	GOBP_ESTABLISHMENT_OF_CELL_POLARITY	1.4688	0.0038	GOBP_ESTABLISHMENT_OF_CELL_POLARITY	ESTABLISHMENT OF CELL POLARITY	Cell Polarity & Spindle Localization
34	Cell Polarity & Spindle Localization	3.30103	3.30103	3.30103	0.3527	0.012	CRB2|SPN|ROCK2|ACTR2|ACTR3|RUFY3|UBXN2B|CDH5|FERMT1|AMOT|AMOTL1|SH3BP1|AMOTL2|WNT7A|WNT7B|MARK2|STK25|ILK|PARD6G|AQP1|EPHB1|ARF6|ARFGEF1|ARHGAP35|ARHGEF11|DCTN1|DST|NDEL1|FOXF1|FAM89B|DYNLT1|IFT80|BRSK2|MOS|CAP1|CAP2|WNT11|CARMIL2|ANK1|DLG2|DOCK8|FEZ1|CCL21|HES5|WDPCP|CCR7|WNT5A|CDC42|CDC42BPB|TTC8|VANGL2|PLEKHG3|MAP1B|CFL1|SNX27|CCL19|CLASP1|CLASP2|WDR1|MCPH1|BCCIP|CORO7|SPDL1|CRK|DOCK7|PARD6B|K…	234	GOBP_ESTABLISHMENT_OR_MAINTENANCE_OF_CELL_POLARITY	1.5436	0.0005	GOBP_ESTABLISHMENT_OR_MAINTENANCE_OF_CELL_POLARITY	ESTABLISHMENT OR MAINTENANCE OF CELL POLARITY	Cell Polarity & Spindle Localization
34	Cell Polarity & Spindle Localization	2.74473	2.74473	2.74473	0.4715	0.0275	NDC80|PLK1|ACTR2|NLRP5|SKA1|ACTR3|CFL1|SKA2|SKA3|UBXN2B|ANKFN1|CLASP1|CLASP2|NUSAP1|OOEP|MCPH1|BCCIP|SPAG5|ZBED3|INPPL1|ESPL1|NUMA1|ZW10|SPDL1|KIF25|FBXW11|DYNC1H1|PAFAH1B1|ASPM|KASH5|CCDC66|SPIRE1|MYH9|SPIRE2|MAD2L1|PKHD1|HDAC3|MAP4|DCTN1|SPRY1|SPRY2|NDEL1|LLGL1|LLGL2|ENKD1|PAX6|KPNB1|DYNLT1|SAPCD2|GJA1|CDK5RAP2|MISP|ITGB1|TLE6|MOS|CENPA|GPSM1|GPSM2|FGF10|NSFL1C|WASL|FMN2|HTT|KAT5|NDE1|MAPRE1	66	GOBP_SPINDLE_LOCALIZATION	1.7242	0.0018	GOBP_SPINDLE_LOCALIZATION	SPINDLE LOCALIZATION	Cell Polarity & Spindle Localization
32	Cerebral Cortex and Forebrain Development	2.4437	2.4437	2.4437	0.3944	0.0403	CDH2|CTNNB1|FOS|WDR62|MDGA1|ARHGAP11B|CEP120|EGFR|HIF1A|EMX1|CCDC141|EMX2|POU3F2|SLIT2|CSNK2A2|SRD5A1|PAFAH1B1|ASPM|ATIC|PEX5|FOXG1|GART|CCDC85C|NKX2-1|NCOA1|EFHC1|SRGAP2|NDEL1|CCDC39|FUT10|FBXO45|ADGRG1|NOTCH2NLA|PALS1|NOTCH2NLB|PAX6|NOTCH2NLC|ARX|NSUN5|FOXP2|PLCB1|BBS4|BAX|DMRTA2|ASCL1|MKKS|NARS1|LHX6|MDK|DISC1|FLNA|TRAPPC9|XAB2|SMO|BBS1|BBS2|KIF14|HTR6|GLI3|FKTN|TSC1|AKIRIN2|MGARP|NEFL|RELN|CN…	131	GOBP_CEREBRAL_CORTEX_DEVELOPMENT	1.5613	0.0036	GOBP_CEREBRAL_CORTEX_DEVELOPMENT	CEREBRAL CORTEX DEVELOPMENT	Cerebral Cortex and Forebrain Development
32	Cerebral Cortex and Forebrain Development	3.39794	3.39794	3.39794	0.3201	0.0115	DKK1|CDH2|DLX5|ERBB4|UCHL5|UNCX|SEMA5A|VAX2|GBX2|NUMB|NUMBL|OGDH|SCYL2|WNT7B|HIF1A|SHANK3|CCDC141|ISL1|ZNF335|SLIT2|CSNK2A2|EPHB3|EZH2|HMGA2|ID2|NCOA1|SRC|SRF|SRGAP2|E2F1|FUT10|ELAVL4|FGFR2|NRP2|DRAXIN|DPCD|FBXO45|UBB|PGAP1|FOXB1|FOXP2|FRS2|FUT1|BTG2|SEMA3A|ASCL1|FEZF1|FEZF2|CRH|SEMA3E|MDK|NR0B1|GLI2|SALL1|NR2F2|SEMA6B|SEMA7A|SMO|GSC|AGTPBP1|ALK|HDAC1|FEZ1|BBS1|HERC1|BBS2|HES5|HESX1|WNT5A|CHD7|TS…	414	GOBP_FOREBRAIN_DEVELOPMENT	1.4788	0.0004	GOBP_FOREBRAIN_DEVELOPMENT	FOREBRAIN DEVELOPMENT	Cerebral Cortex and Forebrain Development
32	Cerebral Cortex and Forebrain Development	2.40894	2.40894	2.40894	0.3259	0.0423	CDH2|DLX5|ERBB4|UCHL5|UNCX|NUMB|NUMBL|OGDH|WNT3A|HIF1A|SHANK3|CCDC141|ZIC3|AQP1|SLIT2|CSNK2A2|EPHB3|EZH2|PEX5|ALDH1A3|ID2|NCOA1|SRF|SRGAP2|NDEL1|CCDC39|FUT10|TMEM108|DRAXIN|DPCD|FBXO45|FBXO41|FOXB1|ARX|FOXP2|BBS4|FUT1|BTG2|SEMA3A|ASCL1|FEZF1|BLOC1S6|FEZF2|NARS1|LHX6|LRRK2|MDK|CRTAC1|SALL1|SEMA6B|DISC1|SEMA7A|EFNA2|XAB2|SMO|AGTPBP1|ALK|HDAC1|FEZ1|BBS1|HERC1|BBS2|HES5|WNT5A|CHD7|TSC1|AKIRIN2|TTC8|S…	287	GOBP_TELENCEPHALON_DEVELOPMENT	1.4326	0.0039	GOBP_TELENCEPHALON_DEVELOPMENT	TELENCEPHALON DEVELOPMENT	Cerebral Cortex and Forebrain Development
26	Circadian control	2.49485	2.49485	2.49485	0.3555	0.0373	ROCK2|USP2|TNFRSF11A|ZFHX3|COL6A1|USP7|HUWE1|EGR3|EZH2|F7|HNRNPD|PIWIL2|ID2|KLF10|TARDBP|TOP1|NAMPT|NCOA2|PPARG|SUV39H1|CRY1|MYBBP1A|SIK1|CREB1|PML|CSF2|ATOH7|BHLHE40|KDM2A|LGR4|BHLHE41|PPP1CC|BLOC1S6|DDB1|HNF4A|MAPK10|CRH|KDM5A|MAPK8|NGF|RORA|SIRT1|AGRP|HDAC1|MTTP|CAVIN3|NFIL3|BTBD9|CARTPT|NR0B2|AHR|ADORA2A|SIX3|NAGLU|EGR1|ADIPOQ|ROGDI|MYCBP2|AANAT|ADRB1|RPE65|HDAC2|ATF4|BMAL1|NONO|NOS2|NR1D1|NR…	211	GOBP_CIRCADIAN_RHYTHM	1.5136	0.0032	GOBP_CIRCADIAN_RHYTHM	CIRCADIAN RHYTHM	Circadian control
26	Circadian control	3.39794	3.39794	3.39794	0.4618	0.0102	ROCK2|USP2|GHRH|GHRHR|ZFHX3|PROX1|USP7|MAPK9|FBXW11|FBXW7|EZH2|HNRNPD|PIWIL2|ID2|KLF10|NKX2-1|TARDBP|ADCY1|NLGN1|PPARG|CRY1|SIK1|MAGEL2|PML|CSF2|ATOH7|BHLHE40|KDM2A|SIAH2|PPP1CC|DDB1|HNF4A|MAPK10|USP9X|CRH|MTOR|NOCT|MAPK8|GNAQ|OPN3|RORA|BTRC|PDE6B|TOP2A|ADORA2A|KAT5|TP53|MAGED1|PHLPP1|CCAR2|ADRB1|CRY2|GSK3B|PPP1CA|BMAL1|CLOCK|NONO|NR1D1|NR1H3|OPN4|OPN5|CRTC1|CHRNB2|PARP1|SOX14|DRD2|GNA11|PPARA|DR…	115	GOBP_REGULATION_OF_CIRCADIAN_RHYTHM	1.7991	0.0004	GOBP_REGULATION_OF_CIRCADIAN_RHYTHM	REGULATION OF CIRCADIAN RHYTHM	Circadian control
26	Circadian control	2.52288	2.52288	2.52288	0.5639	0.0355	EGR1|USP2|GHRH|EGR2|GHRHR|ZFHX3|ANKFN1|ROGDI|ADRB1|C3ORF70|NR1D1|CIART|CHRNB2|PARP1|ID2|PLN|NCOR1|DRD2|GABRB3|GHRL|PTEN|FXR1|KCNQ1|NCOA2|NLGN1|NMU|KCNA2|HCRTR2|KCND2|CSF2|GPR176|ADORA1|MTA1|BLOC1S6|CRH|NPY2R|NR1D2|MTOR|MTNR1B|PER3|NPS|GPR157|PTGDS|BTBD9|CSNK1E|ADORA2A|TP53|SIX3|MC3R|NAGLU	50	GOBP_RHYTHMIC_BEHAVIOR	1.7443	0.003	GOBP_RHYTHMIC_BEHAVIOR	RHYTHMIC BEHAVIOR	Circadian control
26	Circadian control	2.76955	2.76955	2.76955	0.3298	0.0257	ROCK2|USP2|TNFRSF11A|ZFHX3|COL6A1|USP7|ENOX2|HAS2|HUWE1|CASP2|EGR3|SLIT2|EZH2|F7|HNRNPD|PIWIL2|AXL|PCNA|EREG|ID2|KLF10|TARDBP|TOP1|NAMPT|NCOA1|NCOA2|PPARG|SUV39H1|CRY1|MMP2|MYBBP1A|MSTN|SIK1|CREB1|PML|CSF2|ATOH7|CUL4A|FOXO3|BHLHE40|KDM2A|LGR4|BHLHE41|FZD4|PPP1CC|TGFB2|BLOC1S6|DDB1|HNF4A|MAPK10|TGFB3|CRH|MDK|KDM5A|KDM5C|NR5A1|MAPK8|NGF|RORA|NFYA|SGPL1|SIRT1|PGR|AGRP|HDAC1|MTTP|CAVIN3|NFIL3|HES7|NO…	301	GOBP_RHYTHMIC_PROCESS	1.453	0.0017	GOBP_RHYTHMIC_PROCESS	RHYTHMIC PROCESS	Circadian control
24	DNA Repair (HR/NHEJ)	2.92082	2.92082	2.92082	0.3224	0.0209	USP1|BRD8|NFRKB|TFRC|ACTR2|TNFSF4|PRMT1|HSP90AA1|CCDC117|UCHL5|E2F7|E2F8|CYREN|WDR48|YY1|CCNA2|MAPK15|ACTL6B|HDAC10|DHX36|ERCC8|HNRNPD|TNKS|TNKS2|ERCC2|PCNA|EREG|TFPT|CDKN1A|SPIRE1|CDKN1B|SPIRE2|FANCB|TRIM28|FGFR4|EYA1|EYA2|ARID1A|ARID1B|TMEM161A|BRD7|TERF2|CCT2|CCT3|CCT4|CCT5|CCT7|CCT8|PTK6|HELQ|PML|TCP1|RAD50|NPM2|RAD51AP1|FGFR1|TGFB1|MARCHF6-DT|GATA5|GLI2|MAPK1|KAT7|TRRAP|DMAP1|SIRT1|TNFAIP1|U…	283	GOBP_POSITIVE_REGULATION_OF_DNA_METABOLIC_PROCESS	1.4716	0.0012	GOBP_POSITIVE_REGULATION_OF_DNA_METABOLIC_PROCESS	POSITIVE REGULATION OF DNA METABOLIC PROCESS	DNA Repair (HR/NHEJ)
24	DNA Repair (HR/NHEJ)	2.88606	2.88606	2.88606	0.4175	0.0225	BRD8|ACTR2|PRMT1|CYREN|WDR48|ZCWPW1|ACTL6B|DDX11|MBTD1|MEAF6|MGMT|DPF3|KHDC3L|SPIRE1|SPIRE2|FANCB|KDM4D|ARID1A|ARID1B|BRD7|MORF4L1|MORF4L2|MRE11|MRGBP|UBE2N|MAD2L2|FUS|SPIDR|HELQ|RAD50|RAD51AP1|FOXM1|TRRAP|DMAP1|SIRT1|PNKP|DPF1|HDGFL2|DPF2|PBRM1|PHF10|KAT5|PIAS4|SMARCA2|SMARCC2|SMARCD1|SMARCD2|SMARCE1|SETMAR|VPS72|EP400|EPC1|KMT5B|SLF1|EPC2|KMT5C|SLF2|ACTL6A|OOEP|YEATS4|BCL7A|ERCC6|PARP1|PELI1|NB…	98	GOBP_POSITIVE_REGULATION_OF_DOUBLE_STRAND_BREAK_REPAIR	1.6518	0.0013	GOBP_POSITIVE_REGULATION_OF_DOUBLE_STRAND_BREAK_REPAIR	POSITIVE REGULATION OF DOUBLE STRAND BREAK REPAIR	DNA Repair (HR/NHEJ)
24	DNA Repair (HR/NHEJ)	2.40894	2.40894	2.40894	0.3558	0.0425	USP51|BRD8|ACTR2|PRMT1|CYREN|WDR48|ZCWPW1|DEK|ZNF365|ACTL6B|DDX11|MBTD1|MEAF6|HMGA2|MGMT|DPF3|KHDC3L|SPIRE1|SPIRE2|FANCB|KDM4D|CHEK1|ARID1A|ARID1B|MIR221|BRD7|MORF4L1|TFIP11|MORF4L2|MRE11|MRGBP|UBE2N|MAD2L2|FUS|HELB|SPIDR|HELQ|PML|RAD50|KLHL15|RAD51|RAD51AP1|MAGEF1|PPP4R3A|PPP4R3B|FOXM1|RECQL5|TRRAP|DMAP1|RMI2|SIRT1|C1QBP|OGG1|PNKP|NUDT16L1|POLQ|DPF1|HDGFL2|DPF2|PBRM1|RPA2|PHF10|RTEL1|TWIST1|CSNK…	148	GOBP_REGULATION_OF_DOUBLE_STRAND_BREAK_REPAIR	1.4891	0.0039	GOBP_REGULATION_OF_DOUBLE_STRAND_BREAK_REPAIR	REGULATION OF DOUBLE STRAND BREAK REPAIR	DNA Repair (HR/NHEJ)
24	DNA Repair (HR/NHEJ)	2.56864	2.56864	2.56864	0.6215	0.0334	TOP2B|USP51|MAD2L2|ACTR2|POT1|SETMAR|KMT5B|KMT5C|RIF1|AUNIP|ERCC6|CYREN|DEK|SHLD1|SHLD2|SHLD3|MRNIP|HMGA2|PNKP|FH|NUDT16L1|NSD2|WAS|KDM4D|PARP3|WRAP53|HSF1|TFIP11|PRKDC|SMCHD1|MRE11	31	GOBP_REGULATION_OF_DOUBLE_STRAND_BREAK_REPAIR_VIA_NONHOMOLOGOUS_END_JOINING	1.7654	0.0027	GOBP_REGULATION_OF_DOUBLE_STRAND_BREAK_REPAIR_VIA_NONHOMOLOGOUS_END_JOINING	REGULATION OF DOUBLE STRAND BREAK REPAIR VIA NONHOMOLOGOUS END JOINING	DNA Repair (HR/NHEJ)
10	Embryonic Tube Formation & Tissue Morphogenesis	4	4	4	0.3076	0.0018	DEAF1|CRB2|DKK1|MTHFD1|ROCK2|TPRN|DLL4|MTHFD1L|DLX5|DLX6|TSHZ1|COL6A1|ENG|TTC39C|DLD|DUSP1|DUSP2|SDC4|DUSP4|DUSP5|FBN2|USH1G|VAX2|FOLR1|SFRP1|GBX2|WDR19|GPC3|WNT7B|HIF1A|HTR2B|C2ORF49|ELF5|ZEB1|ITGA2|ITGA3|ITGA4|SIX4|ENSG00000285205|ITGB4|SMAD3|SMAD4|LAMA5|HMGA2|ID2|SPECC1L|WNT5B|WNT8B|TRIM71|LRP5|ETS2|MEGF8|NCOA1|ETV2|MESP1|ZNF568|EXOC4|ZFP36L1|EYA1|EYA2|MIR221|SRF|MIXL1|MMP2|MMP9|SOX8|FGFR2|OVO…	637	GOBP_EMBRYONIC_MORPHOGENESIS	1.501	0	GOBP_EMBRYONIC_MORPHOGENESIS	EMBRYONIC MORPHOGENESIS	Embryonic Tube Formation & Tissue Morphogenesis
10	Embryonic Tube Formation & Tissue Morphogenesis	4	4	4	0.3601	0.0023	DEAF1|TNC|LGR5|MTHFD1|DLL4|MTHFD1L|ENG|SDC4|WDR83|WNT1|VDR|EFNB2|FOLR1|WNT2|EPHA4|SFRP1|WNT2B|GBX2|WNT3A|GPC3|WNT6|WNT9B|HIF1A|YAP1|ILK|ZIC3|AGT|SIX4|CSF1|SLIT2|ADAMTS12|SMAD3|SMAD4|LAMA5|HMGA2|SPECC1L|ARHGAP35|TRIM71|LRP5|MEGF8|MESP1|EYA1|MIR15B|MIR16-1|SRC|SRF|CCDC39|STARD13|SOX8|FGFR2|OVOL2|FKBPL|PML|FOXA1|ASB2|FOXD1|FOXF1|TACSTD2|BBS4|LGR4|RET|FUZ|BCL2|FZD3|FZD6|TGFB1|TGFB2|SEMA3E|MDK|SEMA4C|…	344	GOBP_EPITHELIAL_TUBE_MORPHOGENESIS	1.6464	0	GOBP_EPITHELIAL_TUBE_MORPHOGENESIS	EPITHELIAL TUBE MORPHOGENESIS	Embryonic Tube Formation & Tissue Morphogenesis
10	Embryonic Tube Formation & Tissue Morphogenesis	4	4	4	0.3882	0	DEAF1|TNC|LGR5|MTHFD1|DLL4|MTHFD1L|ENG|ERBB4|SDC4|FERMT1|VDR|EFNB2|FOLR1|EPHA4|SFRP1|GBX2|SH3BP1|GPC3|WNT10A|WNT7B|HBEGF|HIF1A|ILK|LIN7C|SIX4|CSF1|SLIT2|SMAD3|SMAD4|KRT16|LAMA5|HMGA2|LRG1|SPECC1L|WNT5B|TRIM71|LRP5|MEGF8|MESP1|EYA1|MIR15B|MIR16-1|SRC|MIR221|SRF|MMP2|STARD13|SOX8|FGFR2|OVOL2|FKBPL|PML|FOXA1|FOXD1|FOXF1|TACSTD2|FRS2|RET|FUZ|FZD3|RREB1|FZD6|TGFB1|TGFB2|SEMA3C|GRSF1|SEMA3E|MDK|SEMA4C|…	517	GOBP_MORPHOGENESIS_OF_AN_EPITHELIUM	1.8622	0	GOBP_MORPHOGENESIS_OF_AN_EPITHELIUM	MORPHOGENESIS OF AN EPITHELIUM	Embryonic Tube Formation & Tissue Morphogenesis
10	Embryonic Tube Formation & Tissue Morphogenesis	2.65758	2.65758	2.65758	0.3699	0.0294	DEAF1|FGF8|MTHFD1|MTHFD1L|VEGFC|CTNNB1|GRHL3|SDC4|WDR83|MKS1|WNT16|DVL1|FOLR1|WNT2|SFRP1|WNT2B|WNT6|WNT7B|SCRIB|WNT9B|HIF1A|SIX4|LAMA5|TRAF6|ALDH1A2|ALDH1A3|SPECC1L|ARHGAP35|TRIM71|LLGL2|NUP50|SOX8|FGFR2|OSR1|OVOL2|PALS1|PCDH8|ADM|BBS4|RET|FUZ|MTHFR|BCL10|FZD3|FZD6|TGFB1|TGFB2|GRSF1|SEMA4C|PLXNB2|GLMN|GREM1|GRHL2|JAG2|LRP2|HAND1|PRICKLE1|SOX9|HES5|PTCH1|TWIST1|WNT5A|TSC1|NCKAP1|RARG|VANGL2|RGMA|V…	155	GOBP_MORPHOGENESIS_OF_EMBRYONIC_EPITHELIUM	1.5336	0.0022	GOBP_MORPHOGENESIS_OF_EMBRYONIC_EPITHELIUM	MORPHOGENESIS OF EMBRYONIC EPITHELIUM	Embryonic Tube Formation & Tissue Morphogenesis
10	Embryonic Tube Formation & Tissue Morphogenesis	2.36653	2.36653	2.36653	0.346	0.0451	DEAF1|FGF8|MTHFD1|MTHFD1L|HES1|GRHL3|PROX1|SDC4|FERD3L|WDR83|MKS1|WNT1|DVL1|FOLR1|RNF220|SFRP1|GBX2|WDR19|WNT3A|SCRIB|HIF1A|TRAF6|ALDH1A2|SPECC1L|ARHGAP35|TRIM71|EPHA2|ZFP36L1|NUP50|OVOL2|FOXA1|FOXB1|PAX6|ADM|BBS4|FUZ|MTHFR|BCL10|FZD3|FZD6|TGFB1|TGFB2|SEMA3C|SEMA4C|PLXNA2|PLXNB2|GLI2|GLMN|IFT140|ITPK1|INTU|SMO|GRHL2|GPR161|MARCKS|LRP2|GSC|SOX17|PRICKLE1|HES5|PTCH1|TWIST1|WDPCP|WNT5A|GLI3|KAT5|TSC…	165	GOBP_NEURAL_TUBE_DEVELOPMENT	1.4695	0.0043	GOBP_NEURAL_TUBE_DEVELOPMENT	NEURAL TUBE DEVELOPMENT	Embryonic Tube Formation & Tissue Morphogenesis
10	Embryonic Tube Formation & Tissue Morphogenesis	2.85387	2.85387	2.85387	0.4097	0.023	DEAF1|MTHFD1|MTHFD1L|GRHL3|SDC4|WDR83|MKS1|FOLR1|SFRP1|SCRIB|HIF1A|TRAF6|SPECC1L|ARHGAP35|TRIM71|NUP50|OVOL2|ADM|BBS4|FUZ|MTHFR|BCL10|FZD3|FZD6|TGFB1|TGFB2|SEMA4C|PLXNB2|GLMN|GRHL2|LRP2|PRICKLE1|PTCH1|TWIST1|WNT5A|TSC1|NCKAP1|RARG|VANGL2|RGMA|VASP|BRD2|CELSR1|CFL1|PAX2|RPS7|CITED2|RARA|IFT122|IFT172|PRKACA|IFT52|IFT57|SALL4|COBL|SEC24B|ALX1|SFRP2|GDF7|LUZP1|KAT2A|APAF1|BMP5|KDM2B|NODAL|NOG|SLC39A…	105	GOBP_NEURAL_TUBE_FORMATION	1.6219	0.0014	GOBP_NEURAL_TUBE_FORMATION	NEURAL TUBE FORMATION	Embryonic Tube Formation & Tissue Morphogenesis
10	Embryonic Tube Formation & Tissue Morphogenesis	4	4	4	0.3834	0	DEAF1|TNC|CRB2|DKK1|LGR5|TNNI1|MTHFD1|DLL4|MTHFD1L|S1PR1|ENG|ERBB4|SDC4|UBE4B|FERMT1|VDR|EFNB2|FOLR1|EPHA4|SFRP1|GBX2|SH3BP1|GPC3|WNT10A|EGLN1|WNT7B|HBEGF|HIF1A|ILK|ZFPM2|ISL1|ITGA2|ITGA3|LIN7C|SIX4|CSF1|ITGB4|SLIT2|SMAD3|SMAD4|KRT16|LAMA5|HMGA2|LRG1|SPECC1L|WNT5B|TRIM71|LRP5|MEGF8|ETV2|MESP1|EXOC4|EYA1|MIR15B|EYA2|MIR16-1|SRC|MIR221|SRF|MMP2|STARD13|SOX8|FGFR2|NRP2|OVOL2|FKBPL|PML|FOXA1|FOXD1|FO…	638	GOBP_TISSUE_MORPHOGENESIS	1.8773	0	GOBP_TISSUE_MORPHOGENESIS	TISSUE MORPHOGENESIS	Embryonic Tube Formation & Tissue Morphogenesis
10	Embryonic Tube Formation & Tissue Morphogenesis	2.56864	2.56864	2.56864	0.4078	0.0334	DEAF1|VANGL2|RGMA|VASP|MTHFD1|BRD2|CELSR1|MTHFD1L|GRHL3|PAX2|RPS7|SDC4|WDR83|CITED2|MKS1|RARA|IFT122|IFT172|PRKACA|FOLR1|IFT57|SALL4|SFRP1|COBL|SCRIB|SEC24B|ALX1|SFRP2|KAT2A|APAF1|KDM2B|NOG|KIF20B|TRAF6|SKI|SPECC1L|PFN1|ARHGAP35|OPA1|TRIM71|TGIF1|PHACTR4|SPINT1|SPINT2|DLC1|LHX2|LIAS|LMO4|ST14|CC2D2A|DVL2|STIL|SUFU|MED12|CDK20|ADM|BBS4|FUZ|MTHFR|BCL10|FZD3|CECR2|FZD6|TGFB1|TGFB2|TEAD2|PTK7|SEMA4C|…	91	GOBP_TUBE_CLOSURE	1.5806	0.0027	GOBP_TUBE_CLOSURE	TUBE CLOSURE	Embryonic Tube Formation & Tissue Morphogenesis
10	Embryonic Tube Formation & Tissue Morphogenesis	3.1549	3.1549	3.1549	0.3926	0.015	DEAF1|FGF2|FGF8|MTHFD1|MTHFD1L|CTNNB1|GRHL3|PROX1|SDC4|WDR83|MKS1|FOLR1|SFRP1|EDA|EDAR|MMRN2|WNT6|SCRIB|WNT9B|HIF1A|YWHAZ|ITGB1BP1|SIX4|TRAF6|NFIB|SPECC1L|ARHGAP35|TRIM71|NUP50|SOX8|FGFR2|OSR1|OVOL2|ADM|BBS4|RET|FUZ|MTHFR|BCL10|FZD3|FZD6|TGFB1|TGFB2|SEMA4C|PLXNB2|GLMN|PODXL|GREM1|GRHL2|LRP2|HAND1|PRICKLE1|SOX9|HES5|PTCH1|TWIST1|HESX1|MIR210|WNT5A|TSC1|NCKAP1|RARG|HOXA1|VANGL2|RGMA|VASP|BRD2|CELSR…	153	GOBP_TUBE_FORMATION	1.6277	0.0007	GOBP_TUBE_FORMATION	TUBE FORMATION	Embryonic Tube Formation & Tissue Morphogenesis
31	Embryonic Tube Formation & Tissue Morphogenesis	3.30103	3.30103	3.30103	0.4003	0.0118	DKK1|DLX5|DLX6|COL6A1|FBN2|WNT3|WDR19|GPC3|WNT7A|ZIC3|ZNF219|ITGB4|ERRFI1|SMAD4|ALDH1A2|FLVCR1|LRP5|MEGF8|FGFR2|GALNT3|FGFR1|FZD6|TGFB2|SEMA3C|IFT80|HOXA10|PBX1|SALL1|GREM1|GRHL2|SOX9|HDAC1|TWIST1|WDPCP|WNT5A|RUNX2|CHD7|NAGLU|HOXA11|HOXC11|RDH10|EN1|IFT122|IFT172|IFT52|HDAC2|B4GALNT1|HOXD10|HOXD9|ACD|AFF3|KAT2A|ARK2C|ATRX|B3GLCT|B9D1|CIBAR1|CRABP2|DYNC2H1|EVX2|FBXW4|FREM2|HOXD12|IQCE|IRF6|KAT2B|K…	194	GOBP_APPENDAGE_DEVELOPMENT	1.6788	0.0005	GOBP_APPENDAGE_DEVELOPMENT	APPENDAGE DEVELOPMENT	Embryonic Tube Formation & Tissue Morphogenesis
31	Embryonic Tube Formation & Tissue Morphogenesis	3.69897	3.69897	3.69897	0.4324	0.0071	DKK1|FGF8|DLX5|DLX6|VPS54|COL6A1|CTNNB1|CYP26B1|PITX2|FBN2|MKS1|WNT3|WDR19|GPC3|WNT7A|MAP3K20|ZIC3|ZNF219|FGF4|ERRFI1|SMAD4|ALDH1A2|LRP4|FLVCR1|LRP5|FRAS1|MEGF8|NOTCH2|FGFR2|OSR1|HOXA13|HOXA9|PCSK5|BAX|FGFR1|FZD6|TGFB2|SEMA3C|HOXD13|HOXA10|PLXNA2|PBX1|SALL1|IFT140|MSX1|MSX2|INTU|GREM1|GRHL2|PRICKLE1|SOX9|HDAC1|PTCH1|TWIST1|WDPCP|CACNA1C|WNT5A|GLI3|RUNX2|CHD7|IHH|RARG|RECK|ASPH|HOXA11|BMPR1A|HOXC1…	156	GOBP_APPENDAGE_MORPHOGENESIS	1.7474	0.0002	GOBP_APPENDAGE_MORPHOGENESIS	APPENDAGE MORPHOGENESIS	Embryonic Tube Formation & Tissue Morphogenesis
31	Embryonic Tube Formation & Tissue Morphogenesis	4	4	4	0.484	0.004	DKK1|FGF8|DLX5|DLX6|CTNNB1|CYP26B1|PITX2|FBN2|MKS1|WNT3|WDR19|GPC3|WNT7A|MAP3K20|FGF4|SMAD4|ALDH1A2|LRP4|FLVCR1|LRP5|FRAS1|MEGF8|NOTCH2|OSR1|HOXA13|HOXA9|BAX|FGFR1|FZD6|TGFB2|HOXD13|HOXA10|PBX1|SALL1|IFT140|MSX1|MSX2|INTU|GREM1|GRHL2|PRICKLE1|HDAC1|PTCH1|TWIST1|WDPCP|CACNA1C|WNT5A|GLI3|RUNX2|CHD7|IHH|RARG|RECK|HOXA11|BMPR1A|HOXC11|RDH10|EN1|MYCN|GJA5|TFAP2A|IFT122|IFT52|HDAC2|LEF1|SALL4|NIPBL|FGF…	129	GOBP_EMBRYONIC_APPENDAGE_MORPHOGENESIS	1.8853	0.0001	GOBP_EMBRYONIC_APPENDAGE_MORPHOGENESIS	EMBRYONIC APPENDAGE MORPHOGENESIS	Embryonic Tube Formation & Tissue Morphogenesis
9	Epidermis & Keratinocyte Differentiation	4	4	4	0.5155	0.0021	BMP2|FGF2|FGF8|CDH2|GATA2|CLCN2|CTNNB1|HES1|DSPP|LHX3|NR5A2|PROX1|SPDEF|TUBB|ZNF800|DLX3|E2F4|HIF1A|IPO7|YAP1|EMX1|TLR9|POU3F2|NKX2-2|DEUP1|VAX1|NFIB|PLK4|BHLHA15|NKX3-2|GPAT4|SRC|MIR29B1|ONECUT1|CBFA2T2|FGFR2|CCDC78|PTK6|FOXA1|OTP|TGFB1|ASCL1|IFT80|NKX6-3|INSM1|TJP1|GATA5|GATA6|RPTOR|GMNC|YIPF6|MSX1|WNT11|XBP1|PGR|SOX9|NFE2L1|TIGAR|ENAM|PKP1|TTC8|RARG|CAV1|FAM20C|HOXA5|MAP1B|DLL1|ROS1|JAG1|TMIGD…	113	GOBP_COLUMNAR_CUBOIDAL_EPITHELIAL_CELL_DIFFERENTIATION	1.964	0	GOBP_COLUMNAR_CUBOIDAL_EPITHELIAL_CELL_DIFFERENTIATION	COLUMNAR CUBOIDAL EPITHELIAL CELL DIFFERENTIATION	Epidermis & Keratinocyte Differentiation
9	Epidermis & Keratinocyte Differentiation	3.09691	3.09691	3.09691	0.3713	0.0163	AKR1C3|IL20|ROCK2|TPRN|CDH3|WHRN|MYCL|VDR|WNT16|USH2A|SCEL|CASP14|OVOL1|YAP1|ANXA1|ERRFI1|EZH2|KRT16|MAFF|KRT2|ERCC2|EREG|CDKN1A|FGF20|KLF7|ZFP36|ZFP36L1|KRT1|OVOL2|LATS2|BCR|FGFR1|MAP2K1|GATA6|GDF3|GLI2|KRT5|TXNIP|GRHL2|HDAC1|HES5|TRIOBP|WDPCP|SLC44A4|WNT5A|HEY2|PKP1|USH1C|HOXA7|KLK5|KRT10|KRT14|NFKBIZ|TMEM79|PPHLN1|CLRN1|KRT3|ERCC3|HDAC2|EVPL|KRT36|SGPP1|GLI1|KRT4|KRT6B|CERS3|KRT6C|KRT7|MAFG|KR…	255	GOBP_EPIDERMAL_CELL_DIFFERENTIATION	1.577	0.0008	GOBP_EPIDERMAL_CELL_DIFFERENTIATION	EPIDERMAL CELL DIFFERENTIATION	Epidermis & Keratinocyte Differentiation
9	Epidermis & Keratinocyte Differentiation	4	4	4	0.3692	0.0005	DKK1|LGR5|DKK4|ROCK2|TPRN|COL6A1|CDH3|FERMT1|MYCL|VDR|USH2A|EDA|EDAR|SCEL|WNT10A|CLDN1|ERRFI1|EZH2|SMAD4|ELOVL1|KRT16|MAFF|KRT2|LAMA5|ERCC2|EREG|PUM2|KLF7|ZFP36|ZFP36L1|PPARD|SRF|TFDP1|FGFR2|STMN1|OVOL2|TNFRSF19|FUZ|FZD3|FZD6|TGFB2|TRADD|INSR|MAP2K1|GATA6|GDF3|GLI2|KRT5|LDB2|SMO|TXNIP|GRHL2|ZDHHC21|SNAI1|SOX9|HDAC1|CALML5|HES5|TRIOBP|CYSRT1|WDPCP|SLC44A4|WNT5A|HEY2|PKP1|MYSM1|USH1C|VANGL2|HOXA7|H…	402	GOBP_EPIDERMIS_DEVELOPMENT	1.6883	0	GOBP_EPIDERMIS_DEVELOPMENT	EPIDERMIS DEVELOPMENT	Epidermis & Keratinocyte Differentiation
9	Epidermis & Keratinocyte Differentiation	4	4	4	0.7629	0.0007	FGFR2|KLK14|CTNNB1|TMEM79|DSC1|EXT1|KRT25|PLA2G10|DLX3|KRT27|KRT28|BCL2|TGFB2|WNT10A|FLG2|FST|ATP7A|GLI2|KRT71|IGFBP5|INTU|SOSTDC1|SMO|FOXE1|SNAI1|SHH|FGF10|KLF4|NGFR|FGF7|NOTCH1|TP63|KRT17|TGM3|GORAB|FOXQ1|NAGLU|PLOD3	38	GOBP_EPIDERMIS_MORPHOGENESIS	2.2057	0	GOBP_EPIDERMIS_MORPHOGENESIS	EPIDERMIS MORPHOGENESIS	Epidermis & Keratinocyte Differentiation
9	Epidermis & Keratinocyte Differentiation	4	4	4	0.3302	0.0001	CD63|TPRN|COL6A1|ERBB4|MYCL|VDR|USH2A|WNT7B|HIF1A|SLC4A5|WWTR1|ZEB1|ITGA2|CCND1|CLDN1|JUN|EZH2|KRT16|MAFF|KRT2|PCNA|MIR541|GPAT4|MESP1|ZFP36|ZFP36L1|HSD17B4|MMP9|OVOL2|MYD88|RAB25|BARX1|KRT13|MAP2K1|NR2F2|SMO|XBP1|SOX17|SOX9|TBX1|FSHR|WDPCP|SLC44A4|WNT5A|ENAM|PKP1|FAM20C|KLK5|PGK1|BCCIP|DMBT1|EVPL|FASN|CERS3|CEP63|FA2H|CES1|KCNQ1|NHERF1|CCNO|FZD5|SLC9A4|TNF|RAB10|UGCG|ICAM1|ABCA12|CEP152|KRT6A|CL…	781	GOBP_EPITHELIAL_CELL_DIFFERENTIATION	1.6325	0	GOBP_EPITHELIAL_CELL_DIFFERENTIATION	EPITHELIAL CELL DIFFERENTIATION	Epidermis & Keratinocyte Differentiation
9	Epidermis & Keratinocyte Differentiation	3	3	3	0.6216	0.0186	FGFR2|FZD5|BMP2|FGF2|SLC9A4|FGF8|RARB|GATA2|CLCN2|FOXA1|CTNNB1|LHX3|NR5A2|EXT1|PROX1|SPDEF|ZNF800|RARA|WNT4|WDR77|ASCL1|NKX6-3|INSM1|HIF1A|YAP1|IL31RA|XBP1|PGR|NFIB|SOX9|NOTCH1|BHLHA15|GPAT4|TP63|RARG|CAV1	36	GOBP_GLANDULAR_EPITHELIAL_CELL_DIFFERENTIATION	1.8576	0.001	GOBP_GLANDULAR_EPITHELIAL_CELL_DIFFERENTIATION	GLANDULAR EPITHELIAL CELL DIFFERENTIATION	Epidermis & Keratinocyte Differentiation
9	Epidermis & Keratinocyte Differentiation	3.30103	3.30103	3.30103	0.4141	0.0128	AKR1C3|IL20|ROCK2|KRT6A|CYP26B1|CDH3|MACROH2A1|FOXC1|VDR|WNT16|PPP3CA|CNFN|SCEL|ETV4|CASP14|EXPH5|NUMA1|FLG|HRNR|YAP1|ANXA1|IVL|KAZN|KRTAP6-1|KRTAP6-2|KRTAP6-3|LCE1A|LCE1B|LCE1C|LCE1E|ERRFI1|LCE1F|EZH2|LCE2A|KRT16|LCE2B|KRT2|LCE2C|LCE3A|LCE2D|LCE3B|LCE3C|LCE3D|LCE3E|EREG|LCE4A|LCE5A|CDKN1A|LCE6A|LCE7A|FOXN1|SPRR1A|SPRR1B|SPRR2B|EPHA2|SPRR2D|ZFP36|SPRR2E|ZFP36L1|SPRR2F|LATS1|SPRR2G|SPRR3|SPRR4|SPR…	179	GOBP_KERATINOCYTE_DIFFERENTIATION	1.6733	0.0005	GOBP_KERATINOCYTE_DIFFERENTIATION	KERATINOCYTE DIFFERENTIATION	Epidermis & Keratinocyte Differentiation
9	Epidermis & Keratinocyte Differentiation	4	4	4	0.5151	0.0013	DKK1|LGR5|DKK4|TSPEAR|COL6A1|CTNNB1|CDH3|DLX3|FERMT1|EDA|EDAR|WNT10A|EGFR|NUMA1|MPZL3|SMAD4|KRT16|FOXE1|LAMA5|ERCC2|LRP4|PUM2|GNAS|NGFR|FOXI3|FOXN1|TGM3|FOXQ1|FGFR2|TNFRSF19|PLA2G10|LGR4|FUZ|BCL2|FZD3|FZD6|HOXC13|TGFB2|TRADD|PTCH2|SOX21|GLI2|LDB2|IGFBP5|MSX2|NOM1|NSUN2|INTU|SMO|ZDHHC21|SNAI1|SOX9|HDAC1|SPINK5|WNT5A|TRPV3|LRIG1|KRT17|MYSM1|NAGLU|PIAS4|VANGL2|ACVR1B|DNASE1L2|HPSE|KRT14|TMEM79|KRT25…	122	GOBP_MOLTING_CYCLE	2.0095	0	GOBP_MOLTING_CYCLE	MOLTING CYCLE	Epidermis & Keratinocyte Differentiation
9	Epidermis & Keratinocyte Differentiation	4	4	4	0.5469	0.0005	DKK1|LGR5|DKK4|TSPEAR|COL6A1|CTNNB1|CDH3|DLX3|FERMT1|EDA|EDAR|WNT10A|EGFR|NUMA1|SMAD4|FOXE1|LAMA5|ERCC2|LRP4|PUM2|GNAS|NGFR|FOXI3|FOXN1|TGM3|FOXQ1|FGFR2|TNFRSF19|PLA2G10|LGR4|FUZ|BCL2|FZD3|FZD6|HOXC13|TGFB2|TRADD|SOX21|GLI2|LDB2|IGFBP5|MSX2|NOM1|NSUN2|INTU|SMO|ZDHHC21|SNAI1|SOX9|HDAC1|SPINK5|WNT5A|LRIG1|KRT17|MYSM1|NAGLU|PIAS4|VANGL2|ACVR1B|DNASE1L2|HPSE|TMEM79|KRT25|TRPC4AP|KRT27|KRT28|HDAC2|FST…	102	GOBP_MOLTING_CYCLE_PROCESS	2.0747	0	GOBP_MOLTING_CYCLE_PROCESS	MOLTING CYCLE PROCESS	Epidermis & Keratinocyte Differentiation
9	Epidermis & Keratinocyte Differentiation	4	4	4	0.3971	0.0002	AKR1C3|IL20|DKK1|LGR5|ASCL4|DKK4|ROCK2|COL6A1|CDH3|FERMT1|VDR|WNT16|VPS33B|EDA|EDAR|SCEL|WDR48|WNT10A|CASP14|OVOL1|YAP1|ANXA1|ITGA2|ITGA3|ITGB4|CLDN1|ERRFI1|EZH2|SMAD4|ELOVL1|KRT16|KRT2|LAMA5|ERCC2|EREG|PUM2|CDKN1A|ZFP36|ZFP36L1|SRF|FGFR2|STMN1|KRT1|OVOL2|MYD88|TNFRSF19|FAM210B|LATS2|LGR4|FUZ|BCL2|FZD3|BCR|FZD6|TGFB2|TRADD|MAP2K1|GATA6|GLI2|KRT5|LDB2|NOM1|ABCB6|NSUN2|SMO|TXNIP|GRHL2|ZDHHC21|SNAI1…	328	GOBP_SKIN_DEVELOPMENT	1.764	0	GOBP_SKIN_DEVELOPMENT	SKIN DEVELOPMENT	Epidermis & Keratinocyte Differentiation
9	Epidermis & Keratinocyte Differentiation	4	4	4	0.4559	0.0022	DKK1|LGR5|DKK4|COL6A1|CTNNB1|CYP26B1|IL18|CDH3|GRHL3|DLX3|FERMT1|EDA|EDAR|WNT10A|EGFR|NUMA1|FLG|HRNR|CLDN1|SMAD4|ELOVL1|KRT16|FOXE1|LAMA5|ERCC2|LRP4|PUM2|GNAS|NGFR|FOXI3|FOXN1|SRF|TGM3|FOXQ1|FGFR2|STMN1|KRT1|SLC39A7|AP3B1|TMPRSS11F|TNFRSF19|MET|PLA2G10|LGR4|FUZ|BCL2|FZD3|FZD6|HOXC13|TGFB2|TRADD|CLDN4|GATA6|SOX21|GLI2|LDB2|IGFBP5|MSX2|NOM1|NSUN2|INTU|SMO|ZDHHC21|SNAI1|SOX9|HDAC1|SPINK5|CYSRT1|WNT5…	137	GOBP_SKIN_EPIDERMIS_DEVELOPMENT	1.8439	0	GOBP_SKIN_EPIDERMIS_DEVELOPMENT	SKIN EPIDERMIS DEVELOPMENT	Epidermis & Keratinocyte Differentiation
43	Fat cell differentiation	2.52288	2.52288	2.52288	0.5042	0.036	BMP2|ZBTB7B|SFRP1|CARM1|SULT1E1|TPH1|LMO3|HTR2A|ZBTB16|AKT1|SFRP2|SIX1|ZNF385A|ADIRF|CDS1|TMEM64|FFAR4|ID2|AXIN2|KLF5|MEDAG|WNT5B|CMKLR1|LRP5|ZC3H12A|WDFY2|FRZB|WIF1|ZFP36|AAMDC|ADIG|ZBTB7C|ZFP36L1|HTR2C|FNDC5|HNRNPU|PPARD|METRNL|PPARG|MIR29B1|CCDC3|RARRES2|SOX13|VSTM2A|CEBPA|CEBPB|STK3|MAPK14|STK4|CREB1|RREB1|MIR21|PIM1|SAV1|CREBL2|LPL|ASXL2|MIR106A|SYAP1|GDF3|NOCT|INS|DKKL1|SIRT6|XBP1|SNAI2|TRP…	72	GOBP_POSITIVE_REGULATION_OF_FAT_CELL_DIFFERENTIATION	1.7708	0.003	GOBP_POSITIVE_REGULATION_OF_FAT_CELL_DIFFERENTIATION	POSITIVE REGULATION OF FAT CELL DIFFERENTIATION	Fat cell differentiation
43	Fat cell differentiation	2.37675	2.37675	2.37675	0.3862	0.0444	BMP2|GATA2|HES1|SORT1|HDAC6|WNT1|SFRP1|CARM1|WNT3A|LRP3|SULT1E1|WWTR1|YAP1|MEX3C|ZFPM2|AKT1|ZNF385A|SMAD3|FTO|CDS1|ID2|WNT5B|LRP5|MIR103A1|ZC3H12A|FRZB|ZFP36|ZFP36L1|PTPRQ|ZFP36L2|PPARD|PPARG|E2F1|MIR29B1|MIR128-1|MAPK14|CREB1|ATAT1|MIR138-1|ENPP1|RREB1|JDP2|MIR21|TGFB1|PIM1|LPL|GNB3|TRIB3|MIR106A|SYAP1|GDF3|ID4|NOCT|TAF8|CCDC85B|MSX2|RORA|C1QL4|DKKL1|SIRT1|MIR107|XBP1|SNAI2|MIR181A2|MIR27A|MIR27…	148	GOBP_REGULATION_OF_FAT_CELL_DIFFERENTIATION	1.5395	0.0042	GOBP_REGULATION_OF_FAT_CELL_DIFFERENTIATION	REGULATION OF FAT CELL DIFFERENTIATION	Fat cell differentiation
29	Glycolytic Flux (G6P/F6P) & NADH Processing	3.30103	-3.30103	3.30103	-0.7101	0.0118	ADPGK|ENO1|ENO2|PFKL|ENO3|PFKM|PGK1|PRKACA|FOXK1|FOXK2|GALK1|PKM|HK1|HK3|TPI1|PFKFB1|PFKP|PGAM1|PGAM2|BCL2L13|PGK2|GPI|SLC4A1|GCK|PPP2CA|HK2	26	GOBP_GLYCOLYTIC_PROCESS_THROUGH_FRUCTOSE_6_PHOSPHATE	-1.948	0.0005	GOBP_GLYCOLYTIC_PROCESS_THROUGH_FRUCTOSE_6_PHOSPHATE	GLYCOLYTIC PROCESS THROUGH FRUCTOSE 6 PHOSPHATE	Glycolytic Flux (G6P/F6P) & NADH Processing
29	Glycolytic Flux (G6P/F6P) & NADH Processing	2.72125	-2.72125	2.72125	-0.6958	0.0282	PGAM1|PGAM2|BCL2L13|ADPGK|PGK2|GPI|ENO1|ENO2|PFKL|ENO3|PFKM|GCK|PGK1|FOXK1|FOXK2|GALK1|PKM|HK1|HK3|TPI1|HK2|PFKP	22	GOBP_GLYCOLYTIC_PROCESS_THROUGH_GLUCOSE_6_PHOSPHATE	-1.8665	0.0019	GOBP_GLYCOLYTIC_PROCESS_THROUGH_GLUCOSE_6_PHOSPHATE	GLYCOLYTIC PROCESS THROUGH GLUCOSE 6 PHOSPHATE	Glycolytic Flux (G6P/F6P) & NADH Processing
29	Glycolytic Flux (G6P/F6P) & NADH Processing	2.72125	-2.72125	2.72125	-0.5931	0.0282	GPD1|GPD2|ENO1|ENO2|GOT1|PFKL|ENO3|GOT2|PFKM|GPD1L|MDH1|MDH1B|MDH2|PGK1|FOXK1|FOXK2|OGDH|PKM|HK1|HK3|NUDT17|TPI1|NUDT13|PFKP|PGAM1|PC|PGAM2|BCL2L13|SLC25A11|PGK2|GPI|VCP|GCK|NUDT12|SLC25A12|SLC25A13|SLC25A18|SLC25A22|ME1|HK2	40	GOBP_NADH_METABOLIC_PROCESS	-1.7842	0.0019	GOBP_NADH_METABOLIC_PROCESS	NADH METABOLIC PROCESS	Glycolytic Flux (G6P/F6P) & NADH Processing
36	Growth Factor–Mediated Cellular Responses	4	4	4	0.5893	0.0024	CFL1|CFLAR|SNX6|FOS|ERBB4|KNSTRN|CRIPTO|FOXC1|INPP5K|EGFR|IQGAP1|STAT5B|MCM7|AKT1|MAPK3|ZPR1|PDE8A|ERRFI1|NCL|ERBB2|PDPK1|PLCG1|DAB2|ZFP36|ZFP36L1|GAREM1|ZFP36L2|DAB2IP|MED1|PTPN11|DUSP22|DUSP3|BAG4|PPP1R9B|BECN1|ASCL1|BLOC1S6|MARS1|TPR|EEF1A1|GSTP1|BAIAP2|SYAP1|MAPK1|PTPN12|COL1A1|CAD|SNAI2|SOX9|VIL1|GIT1|SPG21	52	GOBP_RESPONSE_TO_EPIDERMAL_GROWTH_FACTOR	2.0669	0.0001	GOBP_RESPONSE_TO_EPIDERMAL_GROWTH_FACTOR	RESPONSE TO EPIDERMAL GROWTH FACTOR	Growth Factor–Mediated Cellular Responses
36	Growth Factor–Mediated Cellular Responses	3.1549	3.1549	3.1549	0.2772	0.0155	CD63|TNC|CRB2|STAT3|DDR2|ZFHX3|ENG|ERBB4|GOT1|FBN2|FERMT1|FGF19|FOLR1|FUT8|GPC3|HAS1|WNT10A|HAS2|SLC39A5|HIF1A|WWOX|HYAL2|ILK|ZEB1|ISL1|ITGA3|CCNA2|CLDN1|LRIT3|JUN|LTBP4|FLT3|LRG1|TRIM71|FGFR4|MEGF8|ZFP36|BRMS1|MIR130A|ZFP36L1|MIR15B|ZFP36L2|MIR16-1|MIR19B1|E2F1|MSTN|NRP2|MAPK14|OVOL2|MAPKAPK2|PML|PTPN11|BPTF|SYAP1|SEMA6A|NR2F2|OFD1|SIRT1|SMURF2|XBP1|SNAI2|SOX9|TBX1|THBS1|FEZ1|MICOS10-NBL1|ADAM17…	804	GOBP_RESPONSE_TO_GROWTH_FACTOR	1.3704	0.0007	GOBP_RESPONSE_TO_GROWTH_FACTOR	RESPONSE TO GROWTH FACTOR	Growth Factor–Mediated Cellular Responses
36	Growth Factor–Mediated Cellular Responses	2.95861	2.95861	2.95861	0.3309	0.0194	STAT3|DDR2|ROCK2|MIR183|SNW1|ZFHX3|SNX6|ENG|MIR498|CDH3|HSPA1A|CDH5|GOT1|SDCBP|FBN2|FERMT1|WNT1|FOLR1|WNT2|FUT8|SFRP1|ARID4A|ARID4B|WNT10A|WNT7A|ANKRD1|BRMS1L|HSP90AB1|WWOX|STUB1|HYAL2|FNDC4|SUDS3|ZEB1|APOA1|ISL1|EMILIN1|ITGA3|CLDN1|JUN|SMAD3|LTBP4|SMAD4|LRG1|BRMS1|MIR130A|ZFP36L1|MIR15B|ZFP36L2|SRC|MIR19B1|PPARG|MSTN|FGFR2|SPI1|OVOL2|CREB1|PML|LATS2|FAM89B|LPXN|TGFB1|TGFB2|CDKN1C|TGFB3|TGFBR1|DK…	322	GOBP_RESPONSE_TO_TRANSFORMING_GROWTH_FACTOR_BETA	1.4696	0.0011	GOBP_RESPONSE_TO_TRANSFORMING_GROWTH_FACTOR_BETA	RESPONSE TO TRANSFORMING GROWTH FACTOR BETA	Growth Factor–Mediated Cellular Responses
50	Heterochromatin Formation and Epigenetic Control	3.69897	3.69897	3.69897	0.2816	0.0071	ASH2L|CENPV|SS18|CBX1|CBX5|UCHL5|CHAF1A|CHAF1B|CHD1L|CHD2|SETD3|ARID4A|ARID4B|DEK|YY1|SUDS3|ZNF335|ATF2|TAF9|EZH2|MOV10|HMGA2|UBR5|TFPT|TOP1|NCOA1|EYA1|EYA2|MYBBP1A|MTA2|SPI1|HNRNPC|MYD88|PML|FOXA1|RNF2|TASOR|HPF1|KAT6A|KDM2A|BPTF|CDKN1C|H2BC1|TLE6|SIRT7|GTF3C4|MORC2|GLMN|MSL2|WDR5|TRRAP|WT1|SIRT1|SOX9|HDAC1|ASIP|HDAC5|HDAC7|HDAC9|TRIM27|AICDA|CHD7|PHF1|MYSM1|PADI2|APLF|ACTR5|ACTR8|POLE3|USP36|BR…	695	GOBP_CHROMATIN_REMODELING	1.3963	0.0002	GOBP_CHROMATIN_REMODELING	CHROMATIN REMODELING	Heterochromatin Formation and Epigenetic Control
50	Heterochromatin Formation and Epigenetic Control	2.30103	2.30103	2.30103	0.3097	0.0497	ASH2L|CENPV|GLYR1|MBD3|NRDE2|H1-0|CBX1|H1-2|CBX5|H2AB1|IFI16|H2AB2|ALKBH4|H2AB3|H2AC1|H2AC11|ARID4A|H2AC12|ARID4B|H2AC13|USP7|H2AC15|ATAD2|H2AC16|ATAD2B|H2AC17|H2AC18|H2AC19|H2AC20|H2AC21|H2AC4|H2AC6|H2AC7|H2AC8|ZNF304|H2AJ|ZNF335|ATF2|H2AL3|H2AP|HDAC10|H2AZ2|EZH2|PHF8|H2AC25|PIWIL1|MOV10|PIWIL2|HMGA2|BAP1|H3C1|PIWIL4|UBR5|H3C10|DNMT3L|H3C11|H3C12|ZFP57|TRIM28|H3C2|H3C3|H3C4|H3C6|CHEK1|H3C7|H3C8|…	314	GOBP_EPIGENETIC_REGULATION_OF_GENE_EXPRESSION	1.3756	0.005	GOBP_EPIGENETIC_REGULATION_OF_GENE_EXPRESSION	EPIGENETIC REGULATION OF GENE EXPRESSION	Heterochromatin Formation and Epigenetic Control
1	Immune Cell Activation & Cell Adhesion	2.95861	2.95861	2.95861	0.2693	0.0193	SPN|STAT3|TFRC|TNFSF11|TNFSF4|EFNB1|VNN1|YY1|ZEB1|IRS2|ZNF335|ITGA4|EZH2|KITLG|FLT3|RC3H1|ZC3H12A|MIR130A|ZFP36L1|ZFP36L2|MYD88|PTPN11|TIRAP|LAMP1|RORA|SEMA6D|XBP1|BLOC1S3|CD27|CD70|TNFRSF14|ADAM17|AHR|ADORA2A|AICDA|AIRE|AKIRIN2|APLF|ARG2|ASCL2|ATAD5|B2M|AZI2|BATF|BCL3|BRD2|BRD4|BTLA|C17ORF99|CAMK4|CCL19|CCR2|CCR6|CD1C|CCDC88B|CD1D|CD209|CD244|CD4|CD40|CD40LG|CD69|CD7|CD74|CD80|CD37|CD84|CD86|CLC…	846	GOBP_LYMPHOCYTE_ACTIVATION	1.3318	0.0011	GOBP_LYMPHOCYTE_ACTIVATION	LYMPHOCYTE ACTIVATION	Immune Cell Activation & Adhesion
1	Immune Cell Activation & Cell Adhesion	2.48149	2.48149	2.48149	0.3691	0.038	HAVCR2|SPN|CYGB|HLA-DRB1|TNFSF4|TSPAN32|SDC4|SFRP1|ANXA1|EMILIN1|TMEM131L|SLC4A2|INPP5D|AXL|ERBB2|ID2|IRF1|RC3H1|ITCH|ZC3H12A|ADAMTS18|MIR130A|SRC|SYT11|CD33|CLEC12A|TNFAIP8L2|LAX1|PTPN11|LGALS3|APOE|DTX1|BCL6|FAM76B|TGFB1|LYN|MDK|GLMN|GPNMB|LDLR|LRFN5|LST1|GRN|MILR1|MIR27A|TNFRSF14|NOS3|ADORA2A|UFL1|MNDA|SH2B3|ARG2|ASCL2|TYROBP|XCL1|ZBTB7B|BTLA|SOCS6|TAFA3|BPI|ZBTB46|ZC3H8|CD200|CD69|CD74|NR1D1|…	229	GOBP_NEGATIVE_REGULATION_OF_CELL_ACTIVATION	1.5025	0.0033	GOBP_NEGATIVE_REGULATION_OF_CELL_ACTIVATION	NEGATIVE REGULATION OF CELL ACTIVATION	Immune Cell Activation & Adhesion
1	Immune Cell Activation & Cell Adhesion	4	4	4	0.4074	0.0009	CDH13|RND1|HAVCR2|TNC|SPN|MIR183|HLA-DRB1|TNFSF4|DSCAM|TSPAN32|DUSP1|SDC4|SEMA5A|WNT1|EPHA4|ANXA1|AP1AR|APOA1|TMEM131L|SLC4A2|ERBB2|IRF1|SPECC1L|RC3H1|MAP4K4|ITCH|ZC3H12A|ARHGAP6|ADAMTS18|SRC|MIR221|MIR222|MMP2|CYP1B1|ARHGDIG|SPI1|TNFAIP8L2|SWAP70|LAX1|PTPN11|TACSTD2|LGALS3|RCC2|DTX1|BCL6|FZD4|LPXN|TGFB1|FBLN1|FZD7|SEMA3E|MAP2K1|MDK|SEMA4D|MIR141|GLMN|SEMA6A|GPNMB|SNAI2|MIR27A|PLXNB1|MIR146A|THBS…	318	GOBP_NEGATIVE_REGULATION_OF_CELL_ADHESION	1.7802	0	GOBP_NEGATIVE_REGULATION_OF_CELL_ADHESION	NEGATIVE REGULATION OF CELL ADHESION	Immune Cell Activation & Adhesion
1	Immune Cell Activation & Cell Adhesion	3.09691	3.09691	3.09691	0.3983	0.0163	HAVCR2|SPN|HLA-DRB1|TNFSF4|TSPAN32|SDC4|WNT1|ANXA1|APOA1|TMEM131L|SLC4A2|ERBB2|IRF1|SPECC1L|RC3H1|ITCH|ZC3H12A|ADAMTS18|MIR221|MIR222|SPI1|TNFAIP8L2|SWAP70|LAX1|PTPN11|LGALS3|DTX1|BCL6|TGFB1|MAP2K1|MDK|MIR141|GLMN|GPNMB|MIR27A|MIR146A|CCL21|TNFRSF14|ADORA2A|PLG|TRPV4|UFL1|SH2B3|ARG2|ASCL2|XCL1|ZBTB7B|BTLA|SOCS6|ADIPOQ|ZC3H8|YTHDF2|AKNA|CD69|CD74|CD80|CD37|CD86|CLEC4G|PELI1|UBASH3B|CXCL12|KLF4|PPA…	215	GOBP_NEGATIVE_REGULATION_OF_CELL_CELL_ADHESION	1.6348	0.0008	GOBP_NEGATIVE_REGULATION_OF_CELL_CELL_ADHESION	NEGATIVE REGULATION OF CELL CELL ADHESION	Immune Cell Activation & Adhesion
1	Immune Cell Activation & Cell Adhesion	2.5376	2.5376	2.5376	0.4141	0.0345	HAVCR2|HMGB1|SPN|IDO1|IFNL1|HLA-DRB1|TNFSF4|TSPAN32|IL2|SDC4|IL2RA|LAPTM5|MIRLET7G|LGALS9|LILRB4|LRRC32|MIR181C|MIR30B|PDCD1LG2|PRNP|MIRLET7E|SCRIB|STAT5A|ANXA1|AKT1|TMEM131L|MARCHF7|TNFRSF21|SLC4A2|ERBB2|IRF1|RC3H1|ITCH|ZC3H12A|MIR221|MIR222|NRARP|CDKN2A|RAG2|TNFAIP8L2|LAX1|MIR31|PTPN11|VSIG4|VTCN1|LGALS3|WNK1|DTX1|BCL6|MIR21|TGFB1|MDK|MIR141|GLMN|GPNMB|MIR27A|MIR146A|CBFB|CCL21|IL10|TNFRSF14|DA…	159	GOBP_NEGATIVE_REGULATION_OF_LEUKOCYTE_CELL_CELL_ADHESION	1.5833	0.0029	GOBP_NEGATIVE_REGULATION_OF_LEUKOCYTE_CELL_CELL_ADHESION	NEGATIVE REGULATION OF LEUKOCYTE CELL CELL ADHESION	Immune Cell Activation & Adhesion
1	Immune Cell Activation & Cell Adhesion	3	3	3	0.5253	0.0185	HAVCR2|SPN|IDO1|HLA-DRB1|TSPAN32|IL2|SDC4|IL2RA|LAPTM5|LGALS9|LILRB4|LRRC32|MIR181C|PDCD1LG2|PRNP|SCRIB|TMEM131L|TNFAIP3|MARCHF7|TNFRSF21|SLC4A2|INPP5D|ERBB2|RC3H1|ITCH|CDKN2A|PTPN11|VSIG4|VTCN1|ENPP3|BCL6|TGFB1|BTK|LYN|GLMN|GPNMB|LST1|GREM1|PHF7|IL10|TNFRSF14|IHH|MNDA|ARG2|MAD1L1|TYROBP|IL33|DLG1|XCL1|IL4I1|LGALS9B|RIPOR2|CBLB|LGALS9C|ZBTB7B|BTLA|CD300A|TWSG1|LILRB1|VSIR|LILRB2|CD80|CD37|CD86|PA…	105	GOBP_NEGATIVE_REGULATION_OF_LEUKOCYTE_PROLIFERATION	1.8422	0.001	GOBP_NEGATIVE_REGULATION_OF_LEUKOCYTE_PROLIFERATION	NEGATIVE REGULATION OF LEUKOCYTE PROLIFERATION	Immune Cell Activation & Adhesion
1	Immune Cell Activation & Cell Adhesion	2.40894	2.40894	2.40894	0.3963	0.0423	HAVCR2|HMGB1|SPN|IDO1|IFNL1|HLA-DRB1|PGLYRP1|TNFSF4|PGLYRP2|PGLYRP3|TSPAN32|IL2|SDC4|IL2RA|LAPTM5|LGALS9|LILRB4|LRRC32|MIR181C|MIR30B|SFRP1|PDCD1LG2|PRNP|SCRIB|STAT5A|ANXA1|TMEM131L|TNFAIP3|MARCHF7|TNFRSF21|SLC4A2|INPP5D|AXL|ERBB2|ID2|IRF1|RC3H1|HMGB3|ITCH|ZC3H12A|INHA|NRARP|TYRO3|CLEC12A|CDKN2A|RAG2|TNFAIP8L2|TBC1D10C|LAX1|PTPN11|VSIG4|VTCN1|LGALS3|BANK1|DTX1|BCL6|MIR21|TGFB1|BTK|LYN|MDK|GLMN|GP…	177	GOBP_NEGATIVE_REGULATION_OF_LYMPHOCYTE_ACTIVATION	1.55	0.0039	GOBP_NEGATIVE_REGULATION_OF_LYMPHOCYTE_ACTIVATION	NEGATIVE REGULATION OF LYMPHOCYTE ACTIVATION	Immune Cell Activation & Adhesion
1	Immune Cell Activation & Cell Adhesion	2.31876	2.31876	2.31876	0.5081	0.0483	DLG1|HAVCR2|XCL1|IL4I1|LGALS9B|RIPOR2|SPN|CBLB|IDO1|LGALS9C|ZBTB7B|BTLA|HLA-DRB1|TSPAN32|SDC4|IL2RA|LAPTM5|LGALS9|LILRB4|LRRC32|MIR181C|PDCD1LG2|PRNP|TWSG1|LILRB1|SCRIB|VSIR|LILRB2|CD80|CD37|CD86|PAWR|TMEM131L|MARCHF7|TNFRSF21|SLC4A2|CLEC4G|PELI1|ERBB2|SCGB1A1|NDFIP1|SHH|RC3H1|SFTPD|ITCH|CR1|CTLA4|GNRH1|CDKN2A|PTPN6|CEBPB|PLA2G5|PLA2G2A|PTPN11|VSIG4|VTCN1|PRKAR1A|TGFB1|HLA-G|HLA-E|IL20RB|GLMN|PLA…	79	GOBP_NEGATIVE_REGULATION_OF_T_CELL_PROLIFERATION	1.7093	0.0048	GOBP_NEGATIVE_REGULATION_OF_T_CELL_PROLIFERATION	NEGATIVE REGULATION OF T CELL PROLIFERATION	Immune Cell Activation & Adhesion
1	Immune Cell Activation & Cell Adhesion	4	4	4	0.3685	0.0001	CD63|CDH13|SPN|TFRC|DOCK1|DOCK5|TNFSF11|S100A10|TNFSF4|ZFHX3|EFNB1|VNN1|SDC4|SELE|FERMT1|SERPINF2|EFNB2|EPHA4|SFRP1|PTPN23|HAS2|DPP4|EGR3|ILK|EMILIN1|ITGA2|EMILIN2|ITGA3|ITGA4|CSF1|SMAD3|KITLG|ERBB2|PTPRU|MAP4K4|SPTA1|ETS1|HACD1|CEACAM6|HSD17B12|SRC|FUT4|TNFRSF18|FOXA1|PTPN11|FOXF1|FUT1|RET|RREB1|TESK1|P4HB|TGFB1|FBLN1|TGFB2|TJP1|MDK|ST3GAL4|GLI2|XBP1|CD27|CD70|TNFRSF14|TRIOBP|WNT5A|TSC1|PKP1|DMP…	506	GOBP_POSITIVE_REGULATION_OF_CELL_ADHESION	1.7456	0	GOBP_POSITIVE_REGULATION_OF_CELL_ADHESION	POSITIVE REGULATION OF CELL ADHESION	Immune Cell Activation & Adhesion
1	Immune Cell Activation & Cell Adhesion	2.52288	2.52288	2.52288	0.3239	0.036	HAVCR2|SPN|HLA-A|TFRC|HLA-DPB1|HLA-DQB1|TNFSF11|HLA-DRB1|TNFSF4|EFNB1|HLA-DRB3|VNN1|HSPD1|SELE|SERPINF2|EFNB2|IFNG|WNT3A|PTPN23|HAS2|DHPS|DPP4|EGR3|ANXA1|EMILIN1|EMILIN2|ITGA4|ACTL6B|IL1B|ITGB2|KITLG|CD5|IRAK1|PTPRU|VCAM1|SPTA1|ETS1|CEACAM6|SRC|ARID1A|ARID1B|BRD7|FUT4|KLRC4-KLRK1|CLECL1P|KLRK1|FOXA1|PTPN11|LCK|FOXO3|BCL6|TGFB1|GP6|TJP1|LYN|MDK|MALT1|ST3GAL4|GLI2|MAP3K8|XBP1|CD27|DOCK8|CD70|CCL21|…	341	GOBP_POSITIVE_REGULATION_OF_CELL_CELL_ADHESION	1.4241	0.003	GOBP_POSITIVE_REGULATION_OF_CELL_CELL_ADHESION	POSITIVE REGULATION OF CELL CELL ADHESION	Immune Cell Activation & Adhesion
1	Immune Cell Activation & Cell Adhesion	2.82391	2.82391	2.82391	0.5833	0.0239	SPN|STK11|BATF|STAT3|BRD2|BRD4|IL12B|IL12RB1|JAK1|JAK3|IL23A|IL23R|THEMIS|CD3D|CD3E|CD3G|LGALS1|TOX|CD69|CD74|STAT5A|ZFPM1|LOXL3|LY9|CTSL|SHH|IRF4|FOXN1|OPA1|SRF|DOCK2|PTPN2|CYLD|PTPRC|ITPKB|BCL2|ZAP70|EP300|BRAF|MTOR|SLAMF6|IL6|IL6R|IL6ST|SOCS3|STAT6|TBX21|BCL11B|TNFSF18|FOXP3|NFATC3	51	GOBP_POSITIVE_T_CELL_SELECTION	1.7955	0.0015	GOBP_POSITIVE_T_CELL_SELECTION	POSITIVE T CELL SELECTION	Immune Cell Activation & Adhesion
1	Immune Cell Activation & Cell Adhesion	2.72125	2.72125	2.72125	0.4361	0.0282	TFRC|SYK|TNFSF4|IL2|LAPTM5|THEMIS2|MMP14|TICAM1|SFRP1|WNT3A|SH3KBP1|PPP2R3C|TLR4|STAT5A|STAT5B|IRS2|TLR9|TNFAIP3|TNFRSF21|SLAMF8|TNIP2|CD320|INPP5D|ID2|CDKN1A|MIF|RC3H1|HMGB3|IL5|INHA|ZFP36L1|ZFP36L2|PCID2|CDKN2A|SPI1|ADA|MAD2L2|MZB1|TBC1D10C|TCF3|TNFRSF4|VAV3|TIRAP|BANK1|BCL2|BCL6|TGFB1|DDRGK1|BST1|BTK|LYN|IL7|XBP1|MEF2C|CD27|IL10|AHR|AKIRIN2|MNDA|PRLR|APLF|IL21|IL2RG|NCKAP1L|IL27RA|TYROBP|ATAD5…	135	GOBP_REGULATION_OF_B_CELL_ACTIVATION	1.6545	0.0019	GOBP_REGULATION_OF_B_CELL_ACTIVATION	REGULATION OF B CELL ACTIVATION	Immune Cell Activation & Adhesion
1	Immune Cell Activation & Cell Adhesion	2.82391	2.82391	2.82391	0.2888	0.0242	SPN|CYGB|DDR2|TFRC|TNFSF11|TNFSF4|EFNB1|VNN1|SDC4|EFNB2|VPS33B|SFRP1|SH3KBP1|DPP4|EGR3|TCF7|ZEB1|IRS2|EMILIN1|EMILIN2|TMEM131L|ZNF335|SLC4A2|KITLG|ERBB2|ID2|RC3H1|SPTA1|ZC3H12A|MIR130A|ZFP36L1|ZFP36L2|SRC|SPI1|TNFAIP8L2|MYD88|PTPN11|TAC1|TACR1|TNFRSF9|TIRAP|APOE|FUNDC2|TGFB1|HAVCR1|MDK|GLI2|GLMN|RORA|GPNMB|XBP1|GRN|BLOC1S3|THBS1|CD27|CD70|TNFRSF14|WNT5A|AHR|ADORA2A|AKIRIN2|APLF|ARG2|ASCL2|TYROBP|…	663	GOBP_REGULATION_OF_CELL_ACTIVATION	1.3823	0.0015	GOBP_REGULATION_OF_CELL_ACTIVATION	REGULATION OF CELL ACTIVATION	Immune Cell Activation & Adhesion
1	Immune Cell Activation & Cell Adhesion	4	4	4	0.3408	0	CD63|TNC|SPN|TFRC|DOCK1|DOCK5|TNFSF11|TNFSF4|ZFHX3|EFNB1|ENG|VNN1|FERMT1|VPS33B|HAS2|ILK|ITGA2|ITGA3|ITGA4|KITLG|LAMA5|MACF1|PTPRU|RC3H1|MAP4K4|ZC3H12A|HACD1|CEACAM6|HSD17B12|MIR221|MIR222|MMP2|MAPK14|PML|PTPN11|PTPRG|PTPRR|RCC2|RET|RREB1|CELSR2|P4HB|FBLN1|SEMA3E|MAP2K1|SEMA4D|MIR141|SEMA6A|XBP1|SNAI2|SOX9|THBS1|CD27|CD70|TNFRSF14|WDPCP|WNT5A|ADORA2A|PLG|PKP1|ARG2|ASCL2|DMP1|B2M|BRD2|BRD4|BTLA|KI…	828	GOBP_REGULATION_OF_CELL_ADHESION	1.698	0	GOBP_REGULATION_OF_CELL_ADHESION	REGULATION OF CELL ADHESION	Immune Cell Activation & Adhesion
1	Immune Cell Activation & Cell Adhesion	3.52288	3.52288	3.52288	0.3172	0.0085	SPN|TFRC|TNFSF11|TNFSF4|EFNB1|VNN1|SDC4|SELE|SERPINF2|EFNB2|VPS33B|PTPN23|HAS2|DPP4|EGR3|EMILIN1|EMILIN2|TMEM131L|ITGA4|SLC4A2|EPHB3|KITLG|ERBB2|PTPRU|SPECC1L|RC3H1|SPTA1|ETS1|ZC3H12A|CEACAM6|SRC|MIR221|MIR222|FUT4|FUT9|SPI1|TNFAIP8L2|MAPK14|SWAP70|FOXA1|PTPN11|PTPRG|PTPRR|CELSR2|TGFB1|MAP2K1|TJP1|MDK|MIR141|ST3GAL4|GLI2|GLMN|GPNMB|ZDHHC21|XBP1|CD27|CD70|TNFRSF14|WNT5A|ADORA2A|PLG|TRPV4|PKP1|ARG2…	523	GOBP_REGULATION_OF_CELL_CELL_ADHESION	1.4887	0.0003	GOBP_REGULATION_OF_CELL_CELL_ADHESION	REGULATION OF CELL CELL ADHESION	Immune Cell Activation & Adhesion
1	Immune Cell Activation & Cell Adhesion	2.50864	2.50864	2.50864	0.3214	0.0361	IL20|TNFRSF11B|TNFRSF11A|TNFSF11|HLA-DRB1|TNFSF4|VNN1|IFNG|SFRP1|EGR3|ANXA1|TCF7|ZEB1|TMEM131L|ACTL6B|CSF1|SLC4A2|CD2|FANCA|INPP5D|KITLG|CCR1|AXL|ERBB2|ID2|IRF1|IRF4|RC3H1|KLF10|IRF7|ZC3H12A|ZFP36L1|ZFP36L2|ARID1A|POU4F2|ARID1B|BRD7|CLEC12A|SPI1|CLPTM1|CREB1|QKI|LCK|CUL4A|FOXO3|LGALS3|DTX1|BCL6|TGFB1|BRAF|DDRGK1|LTF|LYN|MDK|IL15RA|MALT1|GLI2|XBP1|CD27|PBRM1|PHF10|FSHR|CARTPT|SART1|ASCL2|TYROBP|SM…	345	GOBP_REGULATION_OF_LEUKOCYTE_DIFFERENTIATION	1.4159	0.0031	GOBP_REGULATION_OF_LEUKOCYTE_DIFFERENTIATION	REGULATION OF LEUKOCYTE DIFFERENTIATION	Immune Cell Activation & Adhesion
1	Immune Cell Activation & Cell Adhesion	3.52288	3.52288	3.52288	0.3062	0.0095	SPN|TFRC|TNFSF11|TNFSF4|EFNB1|VNN1|SDC4|EFNB2|SFRP1|SH3KBP1|DPP4|EGR3|TCF7|ZEB1|IRS2|TMEM131L|ZNF335|SLC4A2|KITLG|ERBB2|ID2|RC3H1|SPTA1|ZC3H12A|MIR130A|ZFP36L1|ZFP36L2|SRC|SPI1|TNFAIP8L2|MYD88|PTPN11|TAC1|TACR1|TNFRSF9|TIRAP|TGFB1|MDK|GLI2|GLMN|GPNMB|XBP1|BLOC1S3|CD27|CD70|TNFRSF14|AHR|ADORA2A|AKIRIN2|APLF|ARG2|ASCL2|TYROBP|ATAD5|B2M|BATF|BRD2|BRD4|BTLA|EFNB3|CAMK4|CCL19|CCR2|CCDC88B|CD1D|CD209|Z…	530	GOBP_REGULATION_OF_LYMPHOCYTE_ACTIVATION	1.4394	0.0003	GOBP_REGULATION_OF_LYMPHOCYTE_ACTIVATION	REGULATION OF LYMPHOCYTE ACTIVATION	Immune Cell Activation & Adhesion
1	Immune Cell Activation & Cell Adhesion	3.09691	3.09691	3.09691	0.3794	0.0162	HLA-DRB1|TNFSF4|VNN1|IFNG|SFRP1|EGR3|ANXA1|TCF7|ZEB1|TMEM131L|ACTL6B|SLC4A2|CD2|FANCA|INPP5D|AXL|ERBB2|ID2|IRF1|IRF4|RC3H1|ZC3H12A|ZFP36L1|ZFP36L2|ARID1A|ARID1B|BRD7|SPI1|CLPTM1|LCK|FOXO3|DTX1|BCL6|TGFB1|BRAF|DDRGK1|MDK|IL15RA|MALT1|GLI2|XBP1|CD27|PBRM1|PHF10|SART1|ASCL2|SMARCA2|SMARCC2|SMARCD1|BATF|NFAM1|SMARCD2|ZBTB1|SMARCE1|ZBTB7B|BRD2|BRD4|NFKBID|CAMK4|NFKBIZ|CCL19|CCR2|NLRP3|ZC3H8|CD69|CD74|…	228	GOBP_REGULATION_OF_LYMPHOCYTE_DIFFERENTIATION	1.594	0.0008	GOBP_REGULATION_OF_LYMPHOCYTE_DIFFERENTIATION	REGULATION OF LYMPHOCYTE DIFFERENTIATION	Immune Cell Activation & Adhesion
1	Immune Cell Activation & Cell Adhesion	3.69897	3.69897	3.69897	0.307	0.0071	SPN|STAT3|TFRC|DLL4|TNFSF11|TNFSF4|EFNB1|CDH26|VNN1|SDC4|EFNB2|DPP4|EGR3|TCF7|ZEB1|TMEM131L|ATF2|SLC4A2|SMAD3|KITLG|ERBB2|RC3H1|SPTA1|ZC3H12A|ZFP36L1|ZFP36L2|SRC|SRF|SPI1|TNFAIP8L2|PTPN11|TNFRSF9|ARMC5|TGFB1|FZD7|FZD8|MDK|GLI2|GLMN|RORA|SEMA6D|GPNMB|XBP1|CD27|CD70|TNFRSF14|ADAM17|ADORA2A|AIRE|CHD7|TSC1|ARG2|ASCL2|TYROBP|B2M|AZI2|BATF|BCL3|BRD2|BRD4|BTLA|EFNB3|CAMK4|CCL19|CCR2|CCR6|CD1C|CCDC88B|CD…	604	GOBP_T_CELL_ACTIVATION	1.4694	0.0002	GOBP_T_CELL_ACTIVATION	T CELL ACTIVATION	Immune Cell Activation & Adhesion
1	Immune Cell Activation & Cell Adhesion	3.09691	3.09691	3.09691	0.34	0.0162	SPN|STAT3|DLL4|HLA-DRB1|TNFSF4|VNN1|WNT1|IFNG|EGR3|ANXA1|TCF7|ZEB1|TMEM131L|ATF2|ACTL6B|SLC4A2|IL1B|CD2|FANCA|ERBB2|IRF1|IRF4|RC3H1|ZC3H12A|ITK|ITPRIPL1|ZFP36L1|ZFP36L2|ARID1A|ARID1B|SRF|BRD7|KLRC1|SPI1|CLPTM1|LCK|TNFRSF9|FOXO3|DTX1|BCL2|BCL6|LIPA|ARMC5|TGFB1|FZD7|FZD8|BRAF|GPR89B|MDK|MALT1|GLI2|KAT7|RORA|XBP1|NCAPH2|CD27|PATZ1|PBRM1|ADAM17|PHF10|CCR7|RUNX2|AIRE|CHD7|TSC1|SART1|ASCL2|SMARCA2|B2M|…	327	GOBP_T_CELL_DIFFERENTIATION	1.4925	0.0008	GOBP_T_CELL_DIFFERENTIATION	T CELL DIFFERENTIATION	Immune Cell Activation & Adhesion
1	Immune Cell Activation & Cell Adhesion	3.69897	3.69897	3.69897	0.6609	0.0071	CYLD|RAG2|SPN|BATF|STAT3|BRD2|BRD4|IL12B|IL12RB1|JAK1|JAK3|IL23A|IL23R|BCL2|LGALS1|EP300|TOX|BRAF|CD69|STAT5A|ZFPM1|LOXL3|MTOR|LY9|SLAMF6|IL6|IL6R|IL6ST|IL7|SOCS3|STAT6|CTSL|SHH|IRF4|TBX21|RHOA|FOXN1|OPA1|TP53|TNFSF18|PRKDC|FOXP3	42	GOBP_T_CELL_LINEAGE_COMMITMENT	1.9615	0.0002	GOBP_T_CELL_LINEAGE_COMMITMENT	T CELL LINEAGE COMMITMENT	Immune Cell Activation & Adhesion
1	Immune Cell Activation & Cell Adhesion	2.85387	2.85387	2.85387	0.5711	0.0229	SPN|STK11|BATF|STAT3|BRD2|BRD4|SYK|IL12B|IL12RB1|JAK1|JAK3|IL23A|CD28|IL23R|THEMIS|CD1D|CD3D|CD3E|CD3G|LGALS1|CD4|TOX|CD69|CD74|STAT5A|ZFPM1|LOXL3|LY9|CTSL|SHH|IRF4|FOXN1|OPA1|SRF|DOCK2|IL15|PTPN2|CYLD|PTPRC|ITPKB|BCL2|ZAP70|EP300|BRAF|MTOR|SLAMF6|IL6|IL6R|IL6ST|SOCS3|STAT6|JAG2|TBX21|RHOA|GATA3|BCL11B|ATG5|CCR7|GLI3|AIRE|TNFSF18|FOXP3|NFATC3|CARD11	64	GOBP_T_CELL_SELECTION	1.8526	0.0014	GOBP_T_CELL_SELECTION	T CELL SELECTION	Immune Cell Activation & Adhesion
40	Intercellular Junction Architecture	2.82391	2.82391	2.82391	0.5398	0.0239	CDH13|CDH15|CDH17|CDH18|CDH19|DSP|CDH2|CDH20|ADD1|CDH22|CDH24|CDH26|CTNNB1|CDH3|CDH4|CDH5|CDH6|CDH7|CDH8|CDH9|CDHR3|EFNB2|EPHA4|NUMB|NUMBL|PTPN23|PAK2|RAMP2|JAM3|INAVA|SPECC1L|SMAD7|CSK|PIP5K1C|DSG3|PLEC|TJP1|MTSS1|FER|FERMT2|RDX|DLG5|HIPK1|TBCD|ABI2|VCL|ZNF703|CAMSAP3|KIFC3|CDC42|PLEKHA7|VEGFA|ADAM10|BMP6|CDH1|CDH10|ACTB|CDH11|CDH12	59	GOBP_ADHERENS_JUNCTION_ORGANIZATION	1.8039	0.0015	GOBP_ADHERENS_JUNCTION_ORGANIZATION	ADHERENS JUNCTION ORGANIZATION	Intercellular Junction Architecture
40	Intercellular Junction Architecture	3.69897	3.69897	3.69897	0.3861	0.0073	ACTG1|CDH13|CDH15|CDH17|CDH18|CDH19|ROCK2|CDH2|CDH20|ADD1|CDH22|CDH24|CDH26|CDH3|CDH4|CDH5|CDH6|CDH7|WHRN|CDH8|CDH9|CDHR3|EFNB2|EPHA4|AMOT|NUMB|NUMBL|PTPN23|ACE2|IKBKB|AGT|CLDN1|IL1B|INAVA|SMAD3|SPECC1L|BHLHA15|GJD3|MARVELD3|SRF|OCLN|PKN2|TGFB1|TGFB2|TGFB3|TGFBR1|TJP1|TLN1|TLN2|GNPAT|WNT11|GRHL2|SNAI1|SNAI2|HDAC7|CD2AP|TRPV4|CDC42|PKP1|HOPX|CNTNAP2|NECTIN1|PERP|TMIGD1|FKRP|SVEP1|CLDN19|CLDN3|WDR1…	225	GOBP_CELL_CELL_JUNCTION_ORGANIZATION	1.638	0.0002	GOBP_CELL_CELL_JUNCTION_ORGANIZATION	CELL CELL JUNCTION ORGANIZATION	Intercellular Junction Architecture
37	Intermediate filament organization	3	3	3	0.5162	0.0191	KRT6A|VPS54|EPPK1|DES|INA|AGFG1|AGFG2|ATP8A2|ATF2|VIM|KRT16|KRT2|FAM83H|BFSP1|MACF1|BFSP2|SYNC|KRT19|DST|NDEL1|TOR1A|KRT1|ARHGEF28|ATXN3|NES|KRT13|KRT5|KRT17|PKP1|KRT12|EVPLL|NEFL|DSP|GFAP|KLHL24|KRT10|KRT14|KRT15|KRT23|KRT24|KRT25|KRT26|KRT27|KRT28|KRT3|KRT31|NEFH|KRT32|KRT33A|KRT33B|EVPL|KRT34|KRT35|KRT36|KRT37|KRT38|KRT39|KRT4|KRT40|KRT6B|KRT6C|KRT7|KRT71|KRT72|KRT73|KRT74|KRT75|KRT76|KRT77|KR…	97	GOBP_INTERMEDIATE_FILAMENT_BASED_PROCESS	1.8315	0.001	GOBP_INTERMEDIATE_FILAMENT_BASED_PROCESS	INTERMEDIATE FILAMENT BASED PROCESS	Intermediate filament organization
37	Intermediate filament organization	4	4	4	0.6793	0.0012	NEFL|DSP|KRT6A|GFAP|KLHL24|KRT10|KRT14|KRT15|KRT23|EPPK1|KRT24|KRT25|KRT26|KRT27|KRT28|DES|KRT3|KRT31|NEFH|KRT32|KRT33A|KRT33B|KRT34|INA|KRT35|KRT36|AGFG1|KRT37|AGFG2|KRT38|KRT39|KRT4|KRT40|KRT6B|KRT6C|KRT7|KRT71|KRT72|KRT73|KRT74|VIM|KRT75|KRT76|KRT77|KRT16|KRT78|KRT2|KRT79|KRT80|KRT81|KRT82|KRT83|SHH|BFSP1|KRT85|BFSP2|KRT86|KRT9|KRT84|KRT19|NEFM|PRPH|DNAJB6|PLEC|KRT1|TCHH|PKP2|KRT13|KRT5|BBLN|M…	75	GOBP_INTERMEDIATE_FILAMENT_ORGANIZATION	2.1192	0	GOBP_INTERMEDIATE_FILAMENT_ORGANIZATION	INTERMEDIATE FILAMENT ORGANIZATION	Intermediate filament organization
18	Ion Homeostasis & Intracellular Ionic Balance	2.85387	-2.85387	2.85387	-0.3269	0.0235	TFRC|EDN3|VDR|SLC39A14|SLC39A4|WNT7B|BOLA2|SLC39A5|BOLA2B|HIF1A|SLC4A11|HTR2B|SLC4A5|FXN|SLC4A9|GLRX3|GLRX5|IRS2|ISCU|DGAT2|FITM2|OSBPL2|MIR16-1|MCL1|MSTN|PML|APOE|C1QTNF3|EGLN2|FUNDC2|GCKR|SLC12A4|LDAH|LAMP1|MLXIPL|MTLN|PNPLA2|RNASEK|SIRT1|SLC25A27|XBP1|TPCN2|VAPB|XPR1|FSHR|NCF1|WNT5A|PLG|OXSR1|MAP1A|CNNM4|AQP4|ATP4B|B2M|SNAPIN|BDKRB1|MPC2|CCL19|CCR2|SLC24A4|ACACB|CD40|CACNB4|CASR|TF|DRD2|DRD3|G…	851	GOBP_CELLULAR_HOMEOSTASIS	-1.4007	0.0014	GOBP_CELLULAR_HOMEOSTASIS	CELLULAR HOMEOSTASIS	Ion Homeostasis & Intracellular Ionic Balance
18	Ion Homeostasis & Intracellular Ionic Balance	2.95861	-2.95861	2.95861	-0.3629	0.0193	TFRC|TNFSF11|EDN3|CDH5|VDR|EDN2|ATP1A4|SLC39A14|EGLN1|SLC39A4|BOLA2|BOLA2B|HIF1A|HTR2B|FXN|HYAL2|GLRX3|GLRX5|ISCU|SMAD4|FGFR4|OSBPL2|TMBIM6|TMC8|FASLG|TMTC4|PML|SLC25A23|APOE|TPT1|TGFB1|SLC12A4|MTLN|TRIM24|TRPC5|SLC25A27|TPCN2|VAPB|ATP6V1B1|XPR1|BTBD9|TRPM2|TRPM7|WNT5A|TRPV4|CHD7|SLC17A8|HMOX1|CNNM4|ATP4B|B2M|FAM20A|BDKRB1|CCL19|CCR2|SLC24A4|WFS1|CD40|AKAP6|ANK3|ATP1B1|HTR2A|CALM1|CALM3|CACNB4|KD…	548	GOBP_INORGANIC_ION_HOMEOSTASIS	-1.4894	0.0011	GOBP_INORGANIC_ION_HOMEOSTASIS	INORGANIC ION HOMEOSTASIS	Ion Homeostasis & Intracellular Ionic Balance
18	Ion Homeostasis & Intracellular Ionic Balance	2.31876	-2.31876	2.31876	-0.3437	0.0487	TFRC|EDN3|TMEM106B|CDH5|VDR|EDN2|ATP1A4|SLC39A14|EGLN1|SLC39A4|BOLA2|SLC39A5|BOLA2B|HIF1A|SLC4A11|HTR2B|SLC4A5|FXN|SLC4A9|GLRX3|GLRX5|ISCU|SLC4A2|SMAD4|TMEM9|OSBPL2|TMBIM6|TMC8|FASLG|TMTC4|PML|SLC25A23|APOE|TPT1|TGFB1|LAMP1|MTLN|RNASEK|TRPC5|SLC25A27|GRN|TPCN2|VAPB|ATP6V1B1|TRPM2|TRPM7|WNT5A|TRPV4|CHD7|HMOX1|CLCN3|CNNM4|ATP4B|B2M|SNAPIN|BDKRB1|CCL19|CCR2|SLC24A4|WFS1|CD40|AKAP6|ATP1B1|HTR2A|CALM1…	541	GOBP_INTRACELLULAR_MONOATOMIC_ION_HOMEOSTASIS	-1.4174	0.0048	GOBP_INTRACELLULAR_MONOATOMIC_ION_HOMEOSTASIS	INTRACELLULAR MONOATOMIC ION HOMEOSTASIS	Ion Homeostasis & Intracellular Ionic Balance
18	Ion Homeostasis & Intracellular Ionic Balance	2.95861	-2.95861	2.95861	-0.3546	0.0195	TFRC|TNFSF11|EDN3|TMEM106B|CDH5|VDR|SLC26A4|EDN2|ATP1A4|SLC39A14|EGLN1|SLC39A4|BOLA2|SLC39A5|BOLA2B|HIF1A|SLC4A11|HTR2B|SLC4A5|FXN|HYAL2|SLC4A9|GLRX3|GLRX5|ISCU|SLC4A2|SMAD4|TMEM9|WNK2|OSBPL2|TMBIM6|TMC8|FASLG|TMTC4|PML|SLC25A23|APOE|TPT1|TGFB1|SLC12A4|CRH|LAMP1|MTLN|TRIM24|RNASEK|TRPC5|SLC25A27|GRN|TPCN2|VAPB|ATP6V1B1|BTBD9|TRPM2|TRPM7|WNT5A|TRPV4|CHD7|HMOX1|CLCN3|CNNM4|ATP4B|B2M|FAM20A|SNAPIN|B…	627	GOBP_MONOATOMIC_ION_HOMEOSTASIS	-1.4811	0.0011	GOBP_MONOATOMIC_ION_HOMEOSTASIS	MONOATOMIC ION HOMEOSTASIS	Ion Homeostasis & Intracellular Ionic Balance
4	Ion Transmembrane Transport	4	-4	4	-0.5465	0.0001	STING1|COX17|CYC1|SLC47A2|GHITM|LETM1|SLC18B1|MT-ATP6|MT-ATP8|MT-CO1|ATP1A4|MT-CO2|MT-CO3|MT-CYB|MT-ND1|SLC4A11|MT-ND2|MT-ND3|MT-ND4|MT-ND4L|MT-ND5|MT-ND6|MTCO2P12|NDUFA1|NDUFA10|NDUFA12|NDUFA2|NDUFA3|SLC25A3|NDUFA4|NDUFA5|ATP5MC1|NDUFA6|SLC9A8|ATP5MC2|NDUFA7|ATP5MC3|NDUFA8|ATP5MGL|NDUFA9|NDUFB1|ATP6V0C|NDUFB10|SLC18A1|DMAC2L|NDUFB2|SLC18A2|NDUFB3|NOX5|NDUFB4|NDUFB5|NDUFB6|NDUFB7|TMCO3|NDUFB8|NDU…	187	GOBP_PROTON_TRANSMEMBRANE_TRANSPORT	-2.0392	0	GOBP_PROTON_TRANSMEMBRANE_TRANSPORT	PROTON TRANSMEMBRANE TRANSPORT	Ion Transmembrane Transport
18	Ion Transmembrane Transport	4	-4	4	-0.3665	0.0021	CD63|TMEM63B|UBR3|EDN3|TRPV1|GRIA2|BEST2|SLC39A14|SLC39A4|SLC39A5|SLC4A11|HTR2B|KCNIP1|SLC4A5|KCNMB1|SLC4A9|KCNN1|ISCU|MMP9|PML|SLC12A4|RNASEK|SLC20A2|SLC25A27|TPCN1|TPCN2|SLC48A1|WWP2|OXSR1|SLC17A8|SLC18A3|SLC22A1|CNNM4|ATP4B|SPG7|BDKRB1|CCL19|SLC24A4|CD4|CACNB4|DRD2|KCNQ1|NTSR1|P2RX7|SLC9A4|TRPC4|ABCC8|ATP1A2|KCNJ10|KCNJ8|KCNK1|KCNK2|PSEN1|ATP6AP2|SLC12A2|SLC17A6|SLC17A7|CCL3|SLC1A1|CHRNA7|GPM6…	887	GOBP_MONOATOMIC_CATION_TRANSMEMBRANE_TRANSPORT	-1.564	0	GOBP_MONOATOMIC_CATION_TRANSMEMBRANE_TRANSPORT	MONOATOMIC CATION TRANSMEMBRANE TRANSPORT	Ion Transmembrane Transport
13	Mammary & Salivary Gland Morphogenesis	3	3	3	0.7216	0.0189	PLXND1|FGFR2|PDGFA|FGF8|TGM2|NTN4|TNF|HGF|LAMA5|SNAI2|NRP1|SHH|BTBD7|FGF10|FGF7|LAMA1|FGFR1|SEMA3C|ESRP2|DAG1|BMP7|PLXNA1	22	GOBP_BRANCHING_INVOLVED_IN_SALIVARY_GLAND_MORPHOGENESIS	1.9296	0.001	GOBP_BRANCHING_INVOLVED_IN_SALIVARY_GLAND_MORPHOGENESIS	BRANCHING INVOLVED IN SALIVARY GLAND MORPHOGENESIS	Mammary & Salivary Gland Morphogenesis
13	Mammary & Salivary Gland Morphogenesis	4	4	4	0.5082	0.0015	BMP2|FGF2|FGF8|CDH2|GATA2|GHRH|GHRHR|GCM2|GSX1|HES1|LHX3|PITX2|POU1F1|ZNF800|PROP1|SLC6A3|SOX2|CDK6|EIF2AK3|APOA1|AKT1|ISL1|ARID5B|POU3F2|SMAD3|NKX2-2|SMAD4|SRD5A1|MNX1|CRHR1|FOXE1|EDNRA|HMGA2|ALDH1A2|GIPR|MIR541|FOXI3|BHLHA15|NKX2-1|TG|SRF|ONECUT1|CREB1|PAX6|OTP|ARMC5|ASCL1|CDKN1C|IER3IP1|CRH|TGFBR1|BRAF|DKK3|INSM1|INSR|MAP2K1|HOXD3|MDK|GATA6|NR0B1|NR3C1|NR5A1|PBX1|SOX3|GIP|GLI2|MAPK1|SALL1|STRA…	138	GOBP_ENDOCRINE_SYSTEM_DEVELOPMENT	1.943	0	GOBP_ENDOCRINE_SYSTEM_DEVELOPMENT	ENDOCRINE SYSTEM DEVELOPMENT	Mammary & Salivary Gland Morphogenesis
13	Mammary & Salivary Gland Morphogenesis	2.49485	2.49485	2.49485	0.5369	0.0374	FGF8|IGF1|IGF2|CLCN2|TFCP2L1|NR5A2|NRP1|WLS|FOXC1|EDA|EDAR|ASCL3|TWSG1|EGFR|PDGFA|LAMA5|NFIB|SHH|NKX3-1|ESRP2|POLB|FGFR2|TNF|HGF|PAX6|PDX1|CELA1|FGFR1|TGFB1|TGFB2|SEMA3C|TGFB3|INSR|PLXNA1|PLXND1|TGM2|NTN4|XBP1|SNAI2|SOX10|BTBD7|FGF10|RAB26|SOX9|FGF7|LAMA1|PTF1A|IGSF3|DAG1|BMP7|SRP54	51	GOBP_EXOCRINE_SYSTEM_DEVELOPMENT	1.7485	0.0032	GOBP_EXOCRINE_SYSTEM_DEVELOPMENT	EXOCRINE SYSTEM DEVELOPMENT	Mammary & Salivary Gland Morphogenesis
13	Mammary & Salivary Gland Morphogenesis	4	4	4	0.3816	0	DEAF1|TNC|TNFRSF11A|TNFSF11|SOCS2|ERBB4|E2F7|PYGO2|E2F8|VDR|SFRP1|EDA|EDAR|WNT10A|WNT7B|HIF1A|ELF5|IRS2|ISL1|ARID5B|ITGA2|ATF2|SIX4|BAAT|CCND1|CSF1|CLDN1|CSNK2A2|ERRFI1|JUN|SMAD3|EPHB3|EZH2|SMAD4|HNRNPD|FLT3|GUCD1|LAMA5|HMGA2|IGF2R|PCNA|ID2|PNPT1|RPS15|SRSF5|LRP5|UPF2|NCOA1|GPAT4|MESP1|TG|SRC|SRF|MMP2|FGFR2|PML|FOXA1|FOXB1|FOXF1|FRS2|RREB1|ARMC5|TGFB1|ASCL1|TGFB2|CDKN1C|SEMA3C|TGFB3|CRH|TGFBR1|DK…	451	GOBP_GLAND_DEVELOPMENT	1.7893	0	GOBP_GLAND_DEVELOPMENT	GLAND DEVELOPMENT	Mammary & Salivary Gland Morphogenesis
13	Mammary & Salivary Gland Morphogenesis	4	4	4	0.488	0.0027	TNC|CRIP1|FGF8|IGF1|CSMD1|DDR1|PROX1|PROP1|VDR|SFRP1|EDA|EDAR|WNT3A|EGFR|SCRIB|ELF3|STAT5A|ETV5|TNFAIP3|CSF1|FBXW7|LAMA5|NFIB|NKX3-1|LRP5|EPHA2|NOTCH2|SRC|MMP2|NRG3|CDKN2A|FGFR2|CYP7B1|HGF|PML|FOXA1|PAX6|FEM1B|HOXA13|FRS2|BAX|BCL2|LIPA|FGFR1|TGFB1|TGFB2|SEMA3C|TGFB3|HOXD13|MDK|NR3C1|PLXNA1|HPN|ID4|PLXND1|IGFBP5|MSX2|BTRC|NTN4|XBP1|PGR|SNAI2|KDM5B|SOX9|LAMA1|CCL11|PTCH1|WNT5A|GLI3|LIMS2|RARG|CAV1|…	130	GOBP_GLAND_MORPHOGENESIS	1.9193	0.0001	GOBP_GLAND_MORPHOGENESIS	GLAND MORPHOGENESIS	Mammary & Salivary Gland Morphogenesis
13	Mammary & Salivary Gland Morphogenesis	4	4	4	0.4703	0.0025	DEAF1|FGF2|IGF1|CSMD1|TNFRSF11A|TNFSF11|GHRHR|SOCS2|DDR1|ERBB4|SLC6A3|GPX1|PYGO2|VDR|WNT2|WNT3|WNT3A|MT-CO2|WNT7B|XDH|SCRIB|HIF1A|ELF3|IQGAP3|STAT5A|STAT5B|ELF5|ETV5|IRS2|AKT1|ITGA2|MTCO2P12|CCND1|CSF1|JAK2|OAS2|ID2|ARHGAP35|BRCA2|LRP5|NCOA1|EPHA2|GPAT4|NOTCH4|LATS1|SRC|LBH|NRG3|CDKN2A|FGFR2|CREB1|PML|FOXB1|FOXF1|HOXA9|NEURL1|BAX|RREB1|HOXB9|NME1|TGFB1|TGFB3|NR3C1|GLI2|MAPK1|MSX1|IGFBP5|MSX2|BTRC…	140	GOBP_MAMMARY_GLAND_DEVELOPMENT	1.883	0.0001	GOBP_MAMMARY_GLAND_DEVELOPMENT	MAMMARY GLAND DEVELOPMENT	Mammary & Salivary Gland Morphogenesis
13	Mammary & Salivary Gland Morphogenesis	3.30103	3.30103	3.30103	0.6381	0.0117	FGFR2|FGF8|TNF|HGF|CLCN2|TFCP2L1|PAX6|NRP1|EDA|FGFR1|TGFB1|EDAR|TGFB2|ASCL3|SEMA3C|TGFB3|TWSG1|EGFR|PLXNA1|PLXND1|PDGFA|TGM2|NTN4|LAMA5|XBP1|SNAI2|NFIB|SHH|BTBD7|FGF10|FGF7|LAMA1|NKX3-1|ESRP2|POLB|DAG1|BMP7	37	GOBP_SALIVARY_GLAND_DEVELOPMENT	1.936	0.0005	GOBP_SALIVARY_GLAND_DEVELOPMENT	SALIVARY GLAND DEVELOPMENT	Mammary & Salivary Gland Morphogenesis
5	Mitochondrial Membrane Organization & Transport	2.4318	-2.4318	2.4318	-0.4484	0.0411	IGF1|GHITM|HSPA1A|ERBB4|HSPD1|GPX1|VPS35|FXN|AKT1|MTCH2|ATF2|SIVA1|IFIT2|SMAD3|GCLC|BCL2L1|GCLM|BMF|EYA2|MIR29A|MIR29B1|MCL1|MIR29C|MMP9|HGF|SLC25A31|BAX|PINK1|BCL2|PPIF|SLC25A6|LRRK2|BLOC1S2|MIR17|SOD2|ATP2A1|GSK3A|TP53|HK2|AIFM2|ATG3|BBC3|BCL2A1|BCL2L10|BCL2L2|BIK|BNIP3|PPM1K|BNIP3L|BOK|CCAR2|DAP3|DNM1L|FAM162A|BAD|FIS1|FMC1|FZD9|GGCT|GSK3B|HIGD1A|HRK|IER3|IFI6|JTB|LMNA|MLLT11|MOAP1|ACAA2|MPV17…	112	GOBP_APOPTOTIC_MITOCHONDRIAL_CHANGES	-1.6196	0.0037	GOBP_APOPTOTIC_MITOCHONDRIAL_CHANGES	APOPTOTIC MITOCHONDRIAL CHANGES	Mitochondrial Membrane Organization & Transport
5	Mitochondrial Membrane Organization & Transport	2.42022	-2.42022	2.42022	-0.6205	0.0418	AP3B1|MTX2|ROMO1|OXA1L|BAX|MOAP1|TIMM10B|AGK|CALM3|TMEM126A|MTCH1|MTCH2|TIMM10|TIMM13|SAMM50|TOMM7|TIMM22|BCS1L|TOMM70|TIMM29|TIMM8A|NDUFA13|TIMM8B|TIMM9|MAIP1|COX18|TOMM20|TOMM22|TOMM40|TOMM5|TOMM6|TRMT10B|MTX1	33	GOBP_ESTABLISHMENT_OF_PROTEIN_LOCALIZATION_TO_MITOCHONDRIAL_MEMBRANE	-1.8098	0.0038	GOBP_ESTABLISHMENT_OF_PROTEIN_LOCALIZATION_TO_MITOCHONDRIAL_MEMBRANE	ESTABLISHMENT OF PROTEIN LOCALIZATION TO MITOCHONDRIAL MEMBRANE	Mitochondrial Membrane Organization & Transport
5	Mitochondrial Membrane Organization & Transport	2.37675	-2.37675	2.37675	-0.5741	0.0442	AFG3L2|MTX2|GHITM|MTX3|IMMT|ROMO1|OXA1L|CHCHD6|OMA1|LETM1|PINK1|ADCK1|HSPA9|TIMM10B|AGK|APOO|APOOL|CHCHD3|DNAJC11|TMEM126A|MICOS10|TIMM10|MICOS13|TIMM13|SAMM50|UQCC3|TIMM22|BCS1L|TOMM70|SLC25A46|TIMM29|CIBAR1|TMEM11|TIMM8A|CHCHD10|NDUFA13|TIMM8B|TIMM9|MAIP1|COX18|MICU1|OPA1|TRMT10B|TAFAZZIN|MTX1	45	GOBP_INNER_MITOCHONDRIAL_MEMBRANE_ORGANIZATION	-1.7599	0.0042	GOBP_INNER_MITOCHONDRIAL_MEMBRANE_ORGANIZATION	INNER MITOCHONDRIAL MEMBRANE ORGANIZATION	Mitochondrial Membrane Organization & Transport
5	Mitochondrial Membrane Organization & Transport	2.65758	-2.65758	2.65758	-0.4565	0.0293	SNCA|STAT3|GHITM|HSPA1A|IMMT|ROMO1|CHCHD6|LETM1|ARHGAP11B|TMEM126A|MTCH2|TIMM10|ATF2|SIVA1|TIMM13|TOMM7|TIMM22|TOMM70|TIMM29|TMEM11|TIMM8A|NDUFA13|TIMM8B|PEX5|TIMM9|TOMM20|GCLC|BCL2L1|TOMM22|TOMM40|EYA2|TOMM5|TOMM6|TRMT10B|MIR29A|MIR29B1|TAFAZZIN|MIR29C|AFG3L2|AP3B1|OXA1L|SLC25A31|BAX|PINK1|BCL2|PPIF|SLC25A6|LRRK2|MTCH1|UQCC3|BLOC1S2|MIR17|GSK3A|TP53|HK2|MTX1|BNIP3|PPM1K|BNIP3L|SPG7|BOK|BAD|FZD9|…	119	GOBP_MITOCHONDRIAL_MEMBRANE_ORGANIZATION	-1.6519	0.0022	GOBP_MITOCHONDRIAL_MEMBRANE_ORGANIZATION	MITOCHONDRIAL MEMBRANE ORGANIZATION	Mitochondrial Membrane Organization & Transport
5	Mitochondrial Membrane Organization & Transport	4	-4	4	-0.5853	0.0004	ATP23|COX17|STMP1|MIURF|MT-ND1|MT-ND2|FXN|MT-ND4|MT-ND5|MT-ND6|TMEM126A|IMMP2L|LYRM7|NDUFA13|NDUFA6|NDUFAF1|NDUFB2|NDUFB3|COA8|NDUFC2|NUBPL|NDUFS1|NDUFS2|NDUFS3|NDUFS4|NDUFS5|NDUFS6|NDUFS7|NDUFS8|OXA1L|NDUFAF5|SDHAF2|SDHAF4|NDUFAF4|SDHAF3|SLC25A33|SURF1|UQCC2|UQCC3|UQCRFS1|COX19|FMC1|HIGD1A|CHCHD4|SCO1|SAMM50|SCO2|BCS1L|COA1|NDUFAF7|COA3|COA4|COA5|COX14|COX16|COX18|COX20|FASTKD3|RAB5IF|PET100|PET…	103	GOBP_MITOCHONDRIAL_RESPIRATORY_CHAIN_COMPLEX_ASSEMBLY	-2.0456	0	GOBP_MITOCHONDRIAL_RESPIRATORY_CHAIN_COMPLEX_ASSEMBLY	MITOCHONDRIAL RESPIRATORY CHAIN COMPLEX ASSEMBLY	Mitochondrial Membrane Organization & Transport
5	Mitochondrial Membrane Organization & Transport	2.31876	-2.31876	2.31876	-0.462	0.0488	DNAJC15|COL6A1|GHITM|HSP90AA1|ABCB8|CCDC51|ROMO1|HSPD1|DNAJC19|LETM1|SLC25A28|SLC25A36|TIMM17A|TIMM23|TIMM17B|TOMM7|TIMM23B|TOMM70|TIMM44|PNPT1|SLC25A3|BHLHA15|TOMM20|TOMM20L|TOMM22|TOMM40|TOMM40L|AFG3L2|SLC25A23|SLC25A24|SLC25A31|SLC25A41|SLC25A6|TST|MRPL18|MRS2|SLC25A33|PSEN2|SLC25A51|SLC25A2|SLC25A21|ABCB7|SLC39A8|SLC25A16|SLC25A32|SELENON|LETM2|CPT1B|ADCY10|SLC25A20|PMPCB|SLC25A29|DNLZ|HSPA4|…	104	GOBP_MITOCHONDRIAL_TRANSMEMBRANE_TRANSPORT	-1.6523	0.0048	GOBP_MITOCHONDRIAL_TRANSMEMBRANE_TRANSPORT	MITOCHONDRIAL TRANSMEMBRANE TRANSPORT	Mitochondrial Membrane Organization & Transport
5	Mitochondrial Membrane Organization & Transport	2.48149	-2.48149	2.48149	-0.415	0.0382	STAT3|DNAJC15|COL6A1|GHITM|HSP90AA1|ABCB8|HSPA1A|CCDC51|ROMO1|HSPD1|DNAJC19|LETM1|SLC25A28|SLC25A36|ARHGAP11B|VPS35|MTCH2|TIMM10|ATF2|SIVA1|TIMM13|TIMM17A|TIMM23|TIMM17B|TOMM7|TIMM22|TIMM23B|TOMM70|TIMM29|TIMM44|TIMM8A|NDUFA13|TIMM8B|TIMM9|PNPT1|SLC25A3|BHLHA15|FLVCR1|TOMM20|GCLC|TOMM20L|BCL2L1|TOMM22|TOMM40|TOMM40L|EYA2|TOMM5|TOMM6|TRMT10B|MIR29A|MIR29B1|MIR29C|AFG3L2|SLC25A23|SLC25A24|SLC25A31|…	183	GOBP_MITOCHONDRIAL_TRANSPORT	-1.5972	0.0033	GOBP_MITOCHONDRIAL_TRANSPORT	MITOCHONDRIAL TRANSPORT	Mitochondrial Membrane Organization & Transport
5	Mitochondrial Membrane Organization & Transport	4	-4	4	-0.3928	0.0015	ATP23|STAT3|TFRC|COL6A1|ERBB4|CHCHD6|SLC25A36|FXN|SUPV3L1|ATF2|SMAD3|TMEM11|PNPT1|PUM2|SPIRE1|BCL2L1|BMF|CLUH|EYA2|PPARG|MCL1|MMP9|SLC25A31|SLC25A6|SDHAF3|SIRT7|MGME1|SESN2|NEURL4|AGTPBP1|BLOC1S2|KIF28P|FEZ1|HK2|MGARP|WASF1|SPG7|PRIMPOL|YME1L1|HTRA2|CALM3|SLIRP|CIBAR1|CNTNAP1|KDR|GBA1|GPER1|RAB5IF|HIP1R|P2RX7|AFG1L|VPS13A|CLPP|CLN8|THG1L|EPM2A|RAB32|ATP5F1D|ATP5IF1|ATP7A|DMAC2|BCL2L13|BID|CHCHD10…	432	GOBP_MITOCHONDRION_ORGANIZATION	-1.6409	0	GOBP_MITOCHONDRION_ORGANIZATION	MITOCHONDRION ORGANIZATION	Mitochondrial Membrane Organization & Transport
5	Mitochondrial Membrane Organization & Transport	3.04576	-3.04576	3.04576	-0.6129	0.0168	NDUFC2|NUBPL|NDUFS1|NDUFS2|NDUFS3|NDUFAF2|NDUFS4|NDUFS5|NDUFS6|NDUFS7|NDUFS8|ECSIT|OXA1L|MIURF|NDUFAF5|TMEM70|DMAC1|NDUFAF4|FOXRED1|LYRM2|MT-ND1|ACAD9|MT-ND2|NDUFAF3|NDUFAF6|MT-ND4|NDUFAF8|MT-ND5|TIMMDC1|MT-ND6|TMEM126A|TMEM126B|DMAC2|TMEM186|BCS1L|COA1|NDUFAF7|NDUFA13|NDUFA6|NDUFAF1|TIMM21|NDUFB2|NDUFB3	43	GOBP_NADH_DEHYDROGENASE_COMPLEX_ASSEMBLY	-1.8437	0.0009	GOBP_NADH_DEHYDROGENASE_COMPLEX_ASSEMBLY	NADH DEHYDROGENASE COMPLEX ASSEMBLY	Mitochondrial Membrane Organization & Transport
5	Mitochondrial Membrane Organization & Transport	3.39794	-3.39794	3.39794	-0.462	0.0114	SAE1|DNAJC15|AIP|HSP90AA1|MTERF4|HAX1|ROMO1|SIAH3|HSPD1|DNAJC19|HUWE1|ISG15|AKT1|TMEM126A|MTCH2|TIMM10|TIMM13|FBXW7|TIMM17A|TIMM23|TIMM17B|TOMM7|CSNK2A2|TIMM22|TIMM23B|TOMM70|TIMM29|IMMP2L|TIMM44|TIMM8A|NDUFA13|TIMM8B|BAP1|TIMM9|TOMM20|TOMM20L|TOMM22|TOMM34|TOMM40|TOMM40L|NMT1|TOMM5|TOMM6|TRMT10B|UBL4B|CDKN2A|UBL5|AP3B1|HSPA1L|MAPT|MICALL2|BAG4|OXA1L|BAX|PINK1|PIN1|HK1|LRRK2|ARIH2|MAPK8|MTCH1|SIR…	137	GOBP_PROTEIN_LOCALIZATION_TO_MITOCHONDRION	-1.7189	0.0004	GOBP_PROTEIN_LOCALIZATION_TO_MITOCHONDRION	PROTEIN LOCALIZATION TO MITOCHONDRION	Mitochondrial Membrane Organization & Transport
5	Mitochondrial Membrane Organization & Transport	3.04576	-3.04576	3.04576	-0.3718	0.0177	SAE1|SEC61G|HSP90AA1|SORT1|SGTB|HSPA8|SDCBP|SIAH3|HSPD1|DNAJC19|CDC37|VPS51|SPCS1|SPCS2|HUWE1|SPCS3|YWHAZ|ZDHHC20|RPL11|ZDHHC4|TIMM10|TIMM13|TIMM17A|TIMM23|TIMM17B|TOMM7|CSNK2A2|ITGB2|TIMM22|TIMM23B|TIMM29|VPS13C|TIMM44|VPS13D|TIMM8A|ERBB2|TIMM8B|BAP1|PEX5|TIMM9|IRGM|TOMM20|ANKRD13C|TOMM20L|ITGAM|TOMM22|TOMM34|TOMM40|TOMM40L|TOMM5|TOMM6|TRMT10B|GET4|FUT10|UBL4B|TRAK1|UBL5|TRAK2|PEX12|LAMP2|HSPA1L…	340	GOBP_PROTEIN_TARGETING	-1.5217	0.0009	GOBP_PROTEIN_TARGETING	PROTEIN TARGETING	Mitochondrial Membrane Organization & Transport
5	Mitochondrial Membrane Organization & Transport	3.04576	-3.04576	3.04576	-0.4786	0.0175	SAE1|DNAJC15|AIP|HSP90AA1|MTERF4|HAX1|ROMO1|SIAH3|HSPD1|DNAJC19|HUWE1|MTCH2|TIMM10|TIMM13|FBXW7|TIMM17A|TIMM23|TIMM17B|TOMM7|CSNK2A2|TIMM22|TIMM23B|TOMM70|TIMM29|IMMP2L|TIMM44|TIMM8A|NDUFA13|TIMM8B|BAP1|TIMM9|TOMM20|TOMM20L|TOMM22|TOMM34|TOMM40|TOMM40L|TOMM5|TOMM6|TRMT10B|UBL4B|CDKN2A|UBL5|HSPA1L|MICALL2|BAG4|PINK1|PIN1|LRRK2|ARIH2|MTCH1|SIRT4|TSPO|UBE2D3|ADCY10|GSK3A|BAG3|PMPCB|DNLZ|HSPA4|MGARP|…	109	GOBP_PROTEIN_TARGETING_TO_MITOCHONDRION	-1.7233	0.0009	GOBP_PROTEIN_TARGETING_TO_MITOCHONDRION	PROTEIN TARGETING TO MITOCHONDRION	Mitochondrial Membrane Organization & Transport
5	Mitochondrial Membrane Organization & Transport	2.67778	-2.67778	2.67778	-0.5704	0.0287	PEX10|PEX12|PEX14|DNAJC15|HSP90AA1|ROMO1|HSPD1|DNAJC19|USP9X|CHCHD4|PAM16|PEX1|PEX16|PEX26|PEX13|PEX5L|PEX6|SAMM50|TIMM17A|TIMM23|TIMM17B|TOMM7|TIMM23B|TOMM70|TIMM44|PEX2|GFER|PEX5|PEX7|TIMM50|GRPEL1|GRPEL2|TOMM20|TOMM20L|TOMM22|TIMM21|TOMM40|TOMM40L|DNLZ|HSPA4|AIFM1|LONP2|TRIM37	43	GOBP_PROTEIN_TRANSMEMBRANE_IMPORT_INTO_INTRACELLULAR_ORGANELLE	-1.7829	0.0021	GOBP_PROTEIN_TRANSMEMBRANE_IMPORT_INTO_INTRACELLULAR_ORGANELLE	PROTEIN TRANSMEMBRANE IMPORT INTO INTRACELLULAR ORGANELLE	Mitochondrial Membrane Organization & Transport
5	Mitochondrial Membrane Organization & Transport	2.79588	-2.79588	2.79588	-0.6417	0.0247	COA8|COX17|STMP1|CEP89|MT-CO3|SURF1|SCO1|SCO2|BCS1L|COA1|SLC25A46|COA3|COA4|COA5|COA7|COA6|COX14|COX10|COX16|COX18|COX20|FASTKD3|PET100|PET117|SMIM20|TIMM21|TMEM223|UQCC5|UQCC6|COX19|TACO1	31	GOBP_RESPIRATORY_CHAIN_COMPLEX_IV_ASSEMBLY	-1.8334	0.0016	GOBP_RESPIRATORY_CHAIN_COMPLEX_IV_ASSEMBLY	RESPIRATORY CHAIN COMPLEX IV ASSEMBLY	Mitochondrial Membrane Organization & Transport
49	Mitochondrial translation	3.30103	-3.30103	3.30103	-0.4224	0.0122	TFB2M|MTERF2|MTERF4|MIURF|MPV17L2|MRPS2|MRPS7|MTERF3|MTG1|MTG2|RCC1L|SUPV3L1|GFM2|PNPT1|THAP11|MRPL58|MTIF2|ANGEL2|MTIF3|MTRES1|MTRF1|MTRF1L|AARS2|MRPL41|MRPS30|HSD17B10|DARS2|EARS2|GARS1|GATB|GATC|FOXO3|HARS1|OXA1L|IARS2|LARS2|KANSL1|KANSL3|MRPL18|SHMT2|TRNT1|QRSL1|SLC25A33|RARS2|TEFM|SARS2|TARS2|UQCC2|WARS2|C1QBP|YARS2|LRPPRC|METTL4|CHCHD1|GADD45GIP1|GFM1|MALSU1|MRPL1|MRPL10|MRPL11|MRPL12|MRPL1…	170	GOBP_MITOCHONDRIAL_GENE_EXPRESSION	-1.6413	0.0005	GOBP_MITOCHONDRIAL_GENE_EXPRESSION	MITOCHONDRIAL GENE EXPRESSION	Mitochondrial translation
49	Mitochondrial translation	3.1549	-3.1549	3.1549	-0.454	0.0149	MIURF|MPV17L2|MRPS2|MRPS7|MTG1|MTG2|RCC1L|GFM2|MRPL58|MTIF2|MTIF3|MTRF1|MTRF1L|AARS2|MRPL41|MRPS30|DARS2|EARS2|GARS1|GATB|GATC|HARS1|OXA1L|IARS2|LARS2|MRPL18|SHMT2|QRSL1|RARS2|SARS2|TARS2|UQCC2|WARS2|C1QBP|YARS2|LRPPRC|CHCHD1|GADD45GIP1|GFM1|MALSU1|MRPL1|MRPL10|MRPL11|MRPL12|MRPL13|MRPL14|MRPL15|MRPL16|MRPL17|NGRN|MRPL19|DAP3|MRPL2|MRPL20|MRPL21|MRPL22|MRPL23|MRPL24|MRPL27|MRPL28|AURKAIP1|MRPL3|M…	132	GOBP_MITOCHONDRIAL_TRANSLATION	-1.7118	0.0007	GOBP_MITOCHONDRIAL_TRANSLATION	MITOCHONDRIAL TRANSLATION	Mitochondrial translation
7	Muscle development	2.33724	2.33724	2.33724	0.3384	0.0473	VGLL4|DKK1|ACTN2|TNNI1|DLL4|FGF3|MBD3|MIR25|MYL7|S1PR1|ENG|PRMT1|ADPRHL1|SGCG|SGCZ|ERBB4|UBE4B|AKAP13|EFNB2|WNT2|WNT3A|ANKRD1|EGLN1|YAP1|YY1|ZFPM2|ZIC3|ISL1|SMAD4|ALDH1A2|ID2|FGF20|MESP1|RXRB|MIR19B1|SRF|MIR222|SIK1|FGFR2|FHL2|MAPK14|CREB1|ASB2|FRS2|FGFR1|TGFB1|FZD7|TGFB2|BMP10|TGFBR1|GATA5|GATA6|CALR|WT1|DIPK2A|GREM1|ACADM|LRP2|MEF2C|HAND1|MIR19A|MIR499A|MIR200B|HEY1|HEY2|CDC42|CHD7|TSC1|HOPX|NA…	256	GOBP_CARDIAC_MUSCLE_TISSUE_DEVELOPMENT	1.4355	0.0046	GOBP_CARDIAC_MUSCLE_TISSUE_DEVELOPMENT	CARDIAC MUSCLE TISSUE DEVELOPMENT	Muscle development
7	Muscle development	4	4	4	0.4575	0.0021	ACTG1|ACTN1|ACTN2|ACTN3|COL6A1|ENG|ADPRHL1|SGCZ|AKAP13|ANKRD1|SDC1|ANKRD23|YY1|ISL1|SIX4|SMAD4|MIR19B1|SRF|FHL2|AFG3L2|SYNPO2L|ASB2|BCL2|BIN3|BMP10|TMOD1|TMOD2|TMOD3|TMOD4|CAPN3|SMO|TNNT1|TNNT3|CASQ1|HDAC9|MIR19A|HEY2|KEL|RYR1|CHRNB1|NAGLU|NFATC2|CFL2|CFLAR|WDR1|ADRA1A|HOMER1|AKAP6|CSRP1|CSRP2|CSRP3|CACNB4|CNTNAP1|CXADR|DMD|PPARA|CTDP1|XK|HNRNPU|KDM1A|UCHL1|EDN1|ZMPSTE24|MEIS1|ALPK2|LARGE1|ITGB1|…	206	GOBP_MUSCLE_CELL_DEVELOPMENT	1.8603	0	GOBP_MUSCLE_CELL_DEVELOPMENT	MUSCLE CELL DEVELOPMENT	Muscle development
7	Muscle development	4	4	4	0.4337	0	DKK1|CDH2|DOCK1|DOCK5|COL6A1|ENG|SORT1|EFNB2|SETD3|SDC1|EHD1|YY1|ZEB1|ISL1|SIX4|DYRK1B|EZH2|SMAD4|EREG|ID2|ERVFRD-1|IFRD1|RBM24|WNT5B|ERVW-1|MESP1|CEACAM5|MIR15B|MIR19B1|MIR221|SRF|MIR222|SIK1|FGFR2|FHL2|MAPK14|SYNPO2L|QKI|FOXF1|RBM38|FOXO4|NLN|FRS2|BHLHE41|TGFB1|FZD7|GATA6|SEMA4C|GDF15|MTLN|TMOD1|TMOD2|GLMN|TMOD3|TMOD4|RORA|WT1|GREM1|SIRT1|SMO|XBP1|TNNT1|TNNT3|SOX9|HDAC1|TBX1|HDAC5|HDAC9|TRIM32|…	441	GOBP_MUSCLE_CELL_DIFFERENTIATION	1.9867	0	GOBP_MUSCLE_CELL_DIFFERENTIATION	MUSCLE CELL DIFFERENTIATION	Muscle development
7	Muscle development	4	4	4	0.3759	0.0017	TRIM72|TNNI1|ACTN3|USP2|DLL4|FGF3|ZFHX3|S1PR1|COL6A1|ENG|SGCG|UBE4B|H1-5|CHD2|WNT2|WNT3A|ANKRD1|EGLN1|EGR3|HBEGF|ZFPM2|ISL1|ARID5B|ASNSD1|SIX4|EPHB1|SMAD3|SMAD4|MAFF|LAMA5|CHKB|HSD17B1|RBM24|MSTN|CNTFR|SOX8|FGFR2|COL6A3|VAMP5|SVIL|COPS2|MAPK14|CREB1|ASB2|FOXO4|FOXP2|HMG20B|NLN|YBX3|BCL2|BTG2|TGFB1|BIN3|TGFB2|BMP10|TGFBR1|CHODL|IGSF8|GTF3C5|STRA6|NR2F2|GPC1|WT1|CAPN3|SIRT1|SMO|XBP1|LRP2|MEF2C|GSC|…	372	GOBP_MUSCLE_ORGAN_DEVELOPMENT	1.6776	0	GOBP_MUSCLE_ORGAN_DEVELOPMENT	MUSCLE ORGAN DEVELOPMENT	Muscle development
7	Muscle development	4	4	4	0.3947	0	DKK1|TNNI1|USP2|CDH2|DLL4|DOCK1|DOCK5|ZFHX3|S1PR1|COL6A1|ENG|SORT1|UBE4B|SRA1|CHD2|EFNB2|SETD3|EGLN1|SDC1|EGR3|HBEGF|EHD1|YY1|ZEB1|ZFPM2|ISL1|ARID5B|ASNSD1|SIX4|DYRK1B|EPHB1|SMAD3|EZH2|SMAD4|MAFF|LAMA5|HSD17B1|EREG|ID2|ERVFRD-1|IFRD1|RBM24|WNT5B|ERVW-1|MESP1|ZFP36L1|CEACAM5|MIR15B|MIR19B1|MIR221|PPARD|SRF|MIR222|MSTN|FGF6|SIK1|SOX8|FGFR2|FHL2|SVIL|MAPK14|SYNPO2L|QKI|FOXF1|RBM38|FOXO4|FOXP2|NLN|FR…	731	GOBP_MUSCLE_STRUCTURE_DEVELOPMENT	1.9352	0	GOBP_MUSCLE_STRUCTURE_DEVELOPMENT	MUSCLE STRUCTURE DEVELOPMENT	Muscle development
7	Muscle development	4	4	4	0.3844	0.0001	DKK1|TNNI1|DLL4|S1PR1|COL6A1|ENG|ERBB4|UBE4B|EFNB2|EGLN1|YY1|ZFPM2|ISL1|ASNSD1|SIX4|EPHB1|SMAD3|SMAD4|MAFF|HSD17B1|ID2|IFRD1|RBM24|MESP1|EYA1|EYA2|MIR19B1|SRF|MIR222|MSTN|SIK1|SOX8|FGFR2|FHL2|SVIL|MAPK14|FOXP2|NLN|FRS2|YBX3|BTG2|TGFB1|FZD7|TGFB2|SEMA3C|TGFBR1|GATA5|GATA6|IGSF8|GTF3C5|STRA6|NR2F2|GPC1|WT1|GREM1|SMO|AKIRIN1|HAND1|SOX9|TBX1|HDAC9|TWIST1|HEY1|HEY2|HEYL|ZFAND5|CHD7|TSC1|HOPX|FKRP|XIRP…	454	GOBP_MUSCLE_TISSUE_DEVELOPMENT	1.7696	0	GOBP_MUSCLE_TISSUE_DEVELOPMENT	MUSCLE TISSUE DEVELOPMENT	Muscle development
7	Muscle development	4	4	4	0.505	0.0017	TRIM72|ACTN3|IGF1|DOCK1|DOCK5|COL6A1|CYP26B1|SORT1|KLHL40|GPX1|MMP14|WNT1|PPP3CA|ATP11A|EHD1|MYF5|MYF6|MYMK|MYMX|MYOG|SIX4|DYRK1B|NEO1|ERVFRD-1|RBM24|BHLHA15|ERVW-1|CEACAM5|ADGRB1|MIR206|ADGRB3|MYOCD|SIK1|CACNA1H|LMOD3|MAPK14|RBM38|NLN|BHLHE41|BCL2|PPIF|BIN3|HDAC4|CXCL10|CXCL9|PLEKHO1|MTOR|GDF15|PIEZO1|SMO|DMPK|SELENON|XBP1|MEF2C|HDAC1|SPG11|TBX1|HDAC5|MIR133B|HDAC9|MAML1|MIR200B|PTGFRN|CAV2|KEL|…	138	GOBP_MYOTUBE_DIFFERENTIATION	1.9391	0	GOBP_MYOTUBE_DIFFERENTIATION	MYOTUBE DIFFERENTIATION	Muscle development
7	Muscle development	2.65758	2.65758	2.65758	0.6907	0.0294	FGFR2|FGF2|MAPK14|BMPR1A|MIR17HG|ERBB4|TBX2|TBX20|TBX5|WNT2|FGFR1|PIM1|BMP10|FGF9|GLI1|YAP1|GATA6|ZFPM2|RBPJ|TGFBR3|MIR199A1|CCNB1|CDK1|MEF2C|NOTCH1|MIR204|MIR590|HEY2|NRG1|MIR19B1|MIR222|MIR509-1|MIR548C	33	GOBP_POSITIVE_REGULATION_OF_CARDIAC_MUSCLE_CELL_PROLIFERATION	1.8471	0.0022	GOBP_POSITIVE_REGULATION_OF_CARDIAC_MUSCLE_CELL_PROLIFERATION	POSITIVE REGULATION OF CARDIAC MUSCLE CELL PROLIFERATION	Muscle development
7	Muscle development	2.67778	2.67778	2.67778	0.5974	0.0292	FGF2|FGF8|IGF1|BMPR1A|IGF2|MIR17HG|PROX1|ERBB4|WNT2|ACACB|AKAP6|FGF9|GLI1|YAP1|ZFPM2|AKT1|NOTCH1|MIR204|MIR590|MIR19B1|MIR222|FGFR2|RAG2|EDN1|MAPK14|ARX|TBX2|TBX20|YBX3|TBX5|FGFR1|CACNA2D2|PIM1|SASH3|BMP10|HLX|GATA6|MIR208A|SERP1|BASP1|RBPJ|TGFBR3|IL7|WT1|MIR199A1|SMO|CCNB1|CDK1|MEF2C|PARP2|MIR19A|HEY2|NRG1|MIR509-1|MIR548C	55	GOBP_POSITIVE_REGULATION_OF_ORGAN_GROWTH	1.7851	0.0021	GOBP_POSITIVE_REGULATION_OF_ORGAN_GROWTH	POSITIVE REGULATION OF ORGAN GROWTH	Muscle development
7	Muscle development	3.04576	3.04576	3.04576	0.6262	0.0179	TRIM72|ACTN3|NKX2-5|CYP26B1|MMP14|NACA|ATP11A|MYF5|MYF6|MIR1-1|MYOG|MIR133A1|SMYD1|RBM24|NOTCH1|BHLHA15|CEACAM5|HDAC3|MIR206|MAMSTR|PLPP7|MYOCD|RPL3L|SIK1|MYOD1|LMOD3|MAPK14|RBM38|NLN|BHLHE41|BCL2|HDAC4|SHOX2|MTOR|FBXO22|PIEZO1|DMPK|XBP1|HDAC1|TBX1|HDAC5|MIR133B|HDAC9|MAML1|MIR200B|BDNF|TMEM119|CAV3|CCN3	49	GOBP_REGULATION_OF_MYOTUBE_DIFFERENTIATION	1.8587	0.0009	GOBP_REGULATION_OF_MYOTUBE_DIFFERENTIATION	REGULATION OF MYOTUBE DIFFERENTIATION	Muscle development
7	Muscle development	3.09691	3.09691	3.09691	0.3954	0.0155	ACTN3|COL6A1|WNT3A|ANKRD1|ASNSD1|SIX4|EPHB1|MAFF|HSD17B1|RBM24|MSTN|CNTFR|SOX8|VAMP5|SVIL|COPS2|MAPK14|ASB2|FOXP2|HMG20B|NLN|YBX3|BCL2|BTG2|TGFB1|BIN3|IGSF8|GTF3C5|STRA6|NR2F2|GPC1|WT1|SMO|MEF2C|AKIRIN1|CASQ1|TBX1|HDAC9|TWIST1|HEYL|KEL|RYR1|EGR1|CDK5|CFL2|CFLAR|FKRP|BMAL1|CCNT2|HOMER1|ERO1A|SAP30|HOXD10|HOXD9|CHRNA1|CSRP3|MYH15|SMYD1|CNTNAP1|DMD|PAX5|KLF5|EOMES|FXR1|XK|NF1|LEMD2|COL19A1|PITX1|B4G…	196	GOBP_SKELETAL_MUSCLE_ORGAN_DEVELOPMENT	1.6456	0.0008	GOBP_SKELETAL_MUSCLE_ORGAN_DEVELOPMENT	SKELETAL MUSCLE ORGAN DEVELOPMENT	Muscle development
7	Muscle development	4	4	4	0.4562	0	ACTG1|BNIP2|TRIM72|DKK1|ACTN2|ACTN3|CDH2|DOCK1|DOCK5|COL6A1|ADPRHL1|SORT1|AKAP13|WNT1|EFNB2|WNT3A|ANKRD1|SDC1|ANKRD23|EHD1|CASP7|YY1|ISL1|SIX4|DYRK1B|EZH2|SMAD4|ERVFRD-1|RBM24|BHLHA15|ERVW-1|MESP1|CEACAM5|RXRB|MIR19B1|SRF|MIR222|SIK1|FHL2|MAPK14|SYNPO2L|ASB2|RBM38|NLN|FRS2|BHLHE41|BCL2|TGFB1|BIN3|FZD7|BMP10|GATA6|GDF15|MTLN|TMOD1|CALR|TMOD2|TMOD3|TMOD4|WT1|CAPN3|GREM1|SMO|DMPK|XBP1|ACADM|MEF2C|TN…	321	GOBP_STRIATED_MUSCLE_CELL_DIFFERENTIATION	1.9957	0	GOBP_STRIATED_MUSCLE_CELL_DIFFERENTIATION	STRIATED MUSCLE CELL DIFFERENTIATION	Muscle development
39	Muscle development	2.36653	2.36653	2.36653	0.2621	0.0444	RND2|TNC|STAT3|DDR2|RUFY3|EDN3|S1PR1|ZFY|COL6A1|DSCAM|SOCS2|CDH4|EPPK1|ERBB4|SEMA5A|PYGO2|ECM1|SFRP1|EDN2|WDR48|SH3GL2|WNT7B|EIF4H|WWTR1|FXN|YY1|ZFPM2|LIN7A|ARID5B|LIN7B|LIN7C|ATF2|ITGA4|SIX4|CSF1|SLIT2|SMAD3|EZH2|SMAD4|FTO|GUCA2B|HMGA2|ERCC2|EREG|PUM2|IFRD1|MACF1|MEGF8|GPAT4|MESP1|NRN1|SPTBN2|SPTBN4|ZFP36L1|MIR19B1|POU4F2|PPARD|SRF|MIR222|PDZD11|RASAL2|FBLN5|SELENOM|MSTN|SLC25A25|SPART|FGFR2|NRP…	708	GOBP_DEVELOPMENTAL_GROWTH	1.298	0.0043	GOBP_DEVELOPMENTAL_GROWTH	DEVELOPMENTAL GROWTH	Muscle development
39	Muscle development	2.5376	2.5376	2.5376	0.5088	0.0347	LGR6|IGF1|VPS54|CFLAR|SOX15|TARBP2|COL6A1|NINJ1|EPPK1|FKRP|ERBB4|GATA4|TEC|FZD9|SOX2|GPX1|NACA|RUNX1|XIRP1|ADAM15|PPP3CA|ASCL3|CPQ|WNT7A|TM4SF4|YAP1|ANXA1|CD81|MYF6|MYMK|MYMX|APOD|GAP43|NINJ2|PAX7|EZH2|IFRD1|CDKN1A|DUSP10|KLF5|NOTCH1|CDKN1B|EYS|MIR590|PPARD|MUSTN1|MIR29B1|MSTN|MYOD1|PTN|B4GALNT2|APOA5|CD9|LARGE1|BIN3|FZD7|GNAT2|GJD4|SPAAR|MDK|BCL9|PTPN12|CAPN3|MIR199A1|POSTN|CCNB1|P2RX5|SELENON|K…	84	GOBP_TISSUE_REGENERATION	1.7197	0.0029	GOBP_TISSUE_REGENERATION	TISSUE REGENERATION	Muscle development
21	Neural Progenitor Cell Proliferation	4	4	4	0.4761	0.0008	FGF2|FGF8|IGF1|CDH2|DLL4|GATA2|VEGFC|CTNNA1|TARBP2|CTNNB1|WDR62|PROX1|IFT20|WNT1|WNT2|GBX2|NUMB|VSX2|NUMBL|WNT3A|RRM1|WNT7A|CEP120|SLC39A5|HIF1A|ACSL6|EMX1|EMX2|ILK|ZNF503|DBX2|POU3F2|ZNF335|EPHB1|DCT|MELK|PAFAH1B1|VAX1|ASPM|GNAI2|HMGA2|TEAD3|FOXG1|ID2|NFIB|KCTD13|TRIM71|TRIM3|ARHGEF2|EML1|FGFR2|NDUFS2|ADGRG1|HHIP|APPL2|PAX6|ARTN|DISP3|ARX|NES|FOXO3|OTP|FRS2|DMRTA2|BTG2|FZD3|FGFR1|FZD6|TGFB1|ASCL…	169	GOBP_NEURAL_PRECURSOR_CELL_PROLIFERATION	1.9387	0	GOBP_NEURAL_PRECURSOR_CELL_PROLIFERATION	NEURAL PRECURSOR CELL PROLIFERATION	Neural Progenitor Cell Proliferation
21	Neural Progenitor Cell Proliferation	3.22185	3.22185	3.22185	0.5436	0.0142	KCTD11|NR2E1|FGF2|GATA2|VEGFC|CTNNA1|CTNNB1|FGF13|KIFAP3|TAFA1|WDR62|PROX1|FZD9|LEF1|NUMB|VSX2|NUMBL|WNT3A|AKNA|HIF1A|ACSL6|ZNF335|DOCK7|SKOR2|DCT|CX3CL1|PAFAH1B1|VAX1|ASPM|NBN|CX3CR1|TEAD3|FOXG1|SHH|SMARCD3|DRD2|NOTCH1|NF1|KCNA1|ARHGEF2|LHX5|EML1|PTN|FGFR2|KDM1A|HHIP|PAX6|ARTN|OTP|FRS2|CDON|DMRTA2|BTG2|FZD3|RAB10|FGFR1|TGFB1|ASCL1|ITGB1|LRRK2|DAGLA|DAGLB|PLXNB2|ID4|MIR137|DISC1|RACGAP1|SMO|SOX5|…	76	GOBP_NEUROBLAST_PROLIFERATION	1.9093	0.0006	GOBP_NEUROBLAST_PROLIFERATION	NEUROBLAST PROLIFERATION	Neural Progenitor Cell Proliferation
21	Neural Progenitor Cell Proliferation	3.39794	3.39794	3.39794	0.617	0.0097	NR2E1|FGF2|IGF1|DLL4|VEGFC|ELL3|CTNNB1|WDR62|PROX1|FZD9|WNT3A|TOX|HIF1A|ZNF335|DCT|CX3CL1|ASPM|GNAI2|CX3CR1|FOXG1|SHH|SMARCD3|DRD2|NOTCH1|PITX3|LHX2|KDM1A|ADGRG1|RASSF10|PAX6|DISP3|GPR37L1|NES|OTP|CDON|SBNO1|DMRTA2|RYK|FZD3|ASCL1|INSM1|ITGB1|LYN|MDK|ID4|DISC1|FLNA|SMO|LRP2|SOX10|EGF|GLI3|NAP1L1|VEGFA	54	GOBP_POSITIVE_REGULATION_OF_NEURAL_PRECURSOR_CELL_PROLIFERATION	1.9249	0.0004	GOBP_POSITIVE_REGULATION_OF_NEURAL_PRECURSOR_CELL_PROLIFERATION	POSITIVE REGULATION OF NEURAL PRECURSOR CELL PROLIFERATION	Neural Progenitor Cell Proliferation
21	Neural Progenitor Cell Proliferation	3.52288	3.52288	3.52288	0.5247	0.0085	KCTD11|NF2|NR2E1|FGF2|IGF1|CDH2|DLL4|GATA2|VEGFC|CTNNA1|ELL3|CTNNB1|KIFAP3|TAFA1|WDR62|PROX1|FZD9|VSX2|WNT3A|TOX|HIF1A|EMX1|ILK|ZNF335|SKOR2|DCT|KDM2B|CX3CL1|PDE9A|VAX1|ASPM|GNAI2|CX3CR1|FOXG1|FOXO1|ID2|SHH|SMARCD3|DRD2|NOTCH1|PITX3|TRIM71|NF1|SPINT1|SPINT2|SLC6A4|LHX2|LHX5|PTN|KDM1A|PTPRZ1|ADGRG1|RASSF10|APPL2|PAX6|DISP3|GPR37L1|NES|FOXO3|OTP|CDON|SBNO1|DMRTA2|RYK|BTG2|FZD3|TGFB1|ASCL1|PTBP2|INS…	96	GOBP_REGULATION_OF_NEURAL_PRECURSOR_CELL_PROLIFERATION	1.8978	0.0003	GOBP_REGULATION_OF_NEURAL_PRECURSOR_CELL_PROLIFERATION	REGULATION OF NEURAL PRECURSOR CELL PROLIFERATION	Neural Progenitor Cell Proliferation
46	Neutrophil Motility	2.92082	2.92082	2.92082	0.55	0.0209	PPIB|XCL1|RIPOR2|SYK|EDN3|PERP|PF4V1|DNM1L|PPBP|CCL19|IL23A|PF4|CAMK1D|S100A12|CXCR1|EDN2|DPP4|TNFAIP6|CD74|CD300H|IL1B|JAM3|SLIT2|ITGB2|CX3CL1|CXADR|PIK3CD|DPEP1|CXCL13|BSG|CXCL6|DAPK2|PIP5K1C|MCU|PLA2G1B|MIR223|EDN1|PDE4B|VAV1|LBP|VAV3|LGALS3|TIRAP|CXCR2|PIKFYVE|PREX1|TGFB2|CXCL10|CXCL9|BST1|FCER1G|MDK|JAML|RAC1|RAC2|S100A8|S100A9|THBS4|C1QBP|MPP1|CCL27|CCL28|CCL3|CKLF|ITGA1|TREM1|C3AR1|CCL21|C…	83	GOBP_NEUTROPHIL_CHEMOTAXIS	1.8389	0.0012	GOBP_NEUTROPHIL_CHEMOTAXIS	NEUTROPHIL CHEMOTAXIS	Neutrophil Motility
46	Neutrophil Motility	3.30103	3.30103	3.30103	0.5161	0.0122	SYK|EDN3|PF4V1|PPBP|IL23A|CAMK1D|S100A12|EDN2|DPP4|TNFAIP6|PRTN3|SLAMF8|IL1B|JAM3|SLIT2|ITGB2|DPEP1|IRAK4|DAPK2|FUT4|MIR223|MYD88|VAV1|LBP|VAV3|PECAM1|LGALS3|TIRAP|CXCR2|TGFB2|CXCL10|CXCL9|BST1|MDK|JAML|C1QBP|MPP1|CKLF|TREM1|C3AR1|CCL21|MOSPD2|C5AR1|CCR7|C5AR2|PPIA|IL1R1|NCKAP1L|SRP54|CSF3R|PPIB|XCL1|RIPOR2|EMP2|PERP|DNM1L|CCL19|WDR1|PF4|CXCR1|CD177|CD74|CD300H|MCOLN2|FAM3D|CX3CL1|CD99|CXADR|XG|C…	106	GOBP_NEUTROPHIL_MIGRATION	1.8427	0.0005	GOBP_NEUTROPHIL_MIGRATION	NEUTROPHIL MIGRATION	Neutrophil Motility
42	Nuclear localization	4	4	4	0.6673	0.0027	SYNE3|CLMN|NUDC|TRIM58|LMNA|CEP120|NTN1|PCM1|SLIT1|FBXW11|DOCK7|DYNC1H1|LMNB1|LMNB2|SUN2|MYH10|SYNE2|SUN1|PAFAH1B1|TACC1|TACC2|FHOD1|TACC3|TMEM201|HOOK3|NHERF1|CDC42|DCTN1	28	GOBP_NUCLEAR_MIGRATION	2.0544	0.0001	GOBP_NUCLEAR_MIGRATION	NUCLEAR MIGRATION	Nuclear localization
42	Nuclear localization	4	4	4	0.6506	0.0029	SYNE3|CLMN|NUDC|TRIM58|TLK2|LMNA|CEP120|NTN1|PCM1|CDK9|KIF25|SLIT1|FBXW11|DOCK7|DYNC1H1|LMNB1|LMNB2|SUN2|MYH10|SYNE2|SIRT1|SUN1|PAFAH1B1|TACC1|TACC2|FHOD1|TACC3|TMEM201|HOOK3|NHERF1|CDC42|DCTN1|CAV3	33	GOBP_NUCLEUS_LOCALIZATION	2.0298	0.0001	GOBP_NUCLEUS_LOCALIZATION	NUCLEUS LOCALIZATION	Nuclear localization
4	Oxidative Phosphorylation & Mitochondrial Respiration	4	-4	4	-0.5468	0	ACTN3|COL6A1|ABCD1|DLD|DLST|IDH1|IDH2|KGD4|OGDH|OGDHL|FXN|ISCU|NDUFAB1|SUCLA2|SUCLG1|SUCLG2|AK4|SLC25A23|MLXIPL|MIR210|TRPV4|DLAT|PDHA1|PDHA2|PDHB|NOP53|FH|TNF|MFN2|ACO1|ACO2|ADSL|ANTKMT|ARL2|ATP5F1A|ATP5F1B|ATP5F1C|ATP5F1D|ATP5F1E|ATP5F1EP2|ATP5IF1|ATP5ME|ATP5MF|ATP5MG|ATP5PB|ATP5PD|ATP5PF|ATP5PO|NDP|ATP7A|ATPSCKMT|BCL2L13|BID|BLOC1S1|C2ORF69|CAT|CBFA2T3|CCNB1|CDK1|CHCHD10|CHCHD2|COA6|COQ9|COX10…	198	GOBP_AEROBIC_RESPIRATION	-2.0999	0	GOBP_AEROBIC_RESPIRATION	AEROBIC RESPIRATION	Oxidative Phosphorylation & Mitochondrial Respiration
4	Oxidative Phosphorylation & Mitochondrial Respiration	4	-4	4	-0.5897	0.0011	STAT3|STOML2|DNAJC30|ALDOA|MT-ATP6|MT-ATP8|MT-ND1|MT-ND2|MT-ND3|MT-ND4|MT-ND4L|MT-ND5|MT-ND6|NDUFAB1|NDUFA1|NDUFA10|NDUFA11|NDUFA12|NDUFA13|NDUFA2|NDUFA3|NUDT2|NDUFA5|ATP5MC1|NDUFA6|TREM2|ATP5MC2|NDUFA7|ATP5MC3|NDUFA8|ATP5MGL|NDUFA9|ATP5MJ|ATP5MK|NDUFB1|ATP6V0C|NDUFB10|COX11|NDUFB11|DMAC2L|MIR675|NDUFB2|LDHC|NDUFB3|NDUFB4|PID1|NDUFB5|PRKAG2|NDUFB6|TAFAZZIN|NDUFB7|VPS9D1|NDUFB8|NDUFB9|NDUFC1|NDUFC…	104	GOBP_ATP_BIOSYNTHETIC_PROCESS	-1.9939	0	GOBP_ATP_BIOSYNTHETIC_PROCESS	ATP BIOSYNTHETIC PROCESS	Oxidative Phosphorylation & Mitochondrial Respiration
4	Oxidative Phosphorylation & Mitochondrial Respiration	4	-4	4	-0.4627	0.0024	STAT3|ACTN3|COL6A1|HSPA1A|HSPA1B|HSPA8|ALDOA|IFNG|OGDH|OGDHL|HIF1A|TPI1|NDUFAB1|SRC|SLC25A25|AK1|AK2|AK4|AK5|LETMD1|LIPA|TGFB1|BLOC1S6|GALK1|DDIT4|INSR|MAP2K1|MLXIPL|TSPO|GPI|TMSB4X|ATP6V1B1|HK2|CTNS|FKRP|ENO1|PGK1|ATP1B1|HTR2A|OGT|JMJD8|PARP1|NCOR1|FIGNL1|FLCN|PPARA|KAT2B|PPP2CA|ALDOB|P2RX7|UCHL1|GPD1|ATP1A2|ANTKMT|ARL2|ATP5F1A|ATP5F1B|ATP5F1C|ATP5F1D|ATP5F1E|ATP5F1EP2|ATP5IF1|ATP5ME|ATP5MF|ATP5…	236	GOBP_ATP_METABOLIC_PROCESS	-1.7931	0.0001	GOBP_ATP_METABOLIC_PROCESS	ATP METABOLIC PROCESS	Oxidative Phosphorylation & Mitochondrial Respiration
4	Oxidative Phosphorylation & Mitochondrial Respiration	4	-4	4	-0.619	0	COX8C|SNCA|CYC1|CYCS|DGUOK|DNAJC15|GHITM|DLD|MT-CO1|MT-CO2|MT-CO3|MT-CYB|MT-ND1|MT-ND2|MT-ND3|MT-ND4|MT-ND4L|MT-ND5|ISCU|MT-ND6|MTCH2|MTCO2P12|NDUFAB1|NDUFA1|NDUFA10|NDUFA11|NDUFA12|NDUFA2|NDUFA3|NDUFA4|NDUFA5|NDUFA6|NDUFA7|NDUFA8|NDUFA9|NDUFAF1|NDUFB1|NDUFB10|NDUFB2|NDUFB3|NDUFB4|NDUFB5|NDUFB6|NDUFB7|NDUFB8|NDUFB9|NDUFC1|NDUFC2|NDUFC2-KCTD14|NDUFS1|NDUFS2|NDUFS3|NDUFS4|NDUFS5|NDUFS6|NDUFS7|NDUFS…	101	GOBP_ATP_SYNTHESIS_COUPLED_ELECTRON_TRANSPORT	-2.1631	0	GOBP_ATP_SYNTHESIS_COUPLED_ELECTRON_TRANSPORT	ATP SYNTHESIS COUPLED ELECTRON TRANSPORT	Oxidative Phosphorylation & Mitochondrial Respiration
4	Oxidative Phosphorylation & Mitochondrial Respiration	4	-4	4	-0.5124	0	ACTN3|COL6A1|ABCD1|DLD|DLST|IDH1|IDH2|IFNG|KGD4|OGDH|OGDHL|FXN|ISCU|NDUFAB1|PNPT1|PUM2|CYP1A2|MYBBP1A|SLC25A25|SUCLA2|SUCLG1|SUCLG2|AK4|SLC25A23|TRAP1|MLXIPL|MTLN|MIR210|TRPV4|CISD1|ETFA|ETFB|DLAT|PDHA1|PDHA2|PDHB|NOP53|NOS2|NR4A3|OAS1|SCO2|FH|GBA1|TNF|MFN2|ACO1|ACO2|ADSL|ANTKMT|ARL2|ATP5F1A|ATP5F1B|ATP5F1C|ATP5F1D|ATP5F1E|ATP5F1EP2|ATP5IF1|ATP5ME|ATP5MF|ATP5MG|PPARGC1A|ATP5PB|ATP5PD|PRDM16|ATP5P…	240	GOBP_CELLULAR_RESPIRATION	-2.0169	0	GOBP_CELLULAR_RESPIRATION	CELLULAR RESPIRATION	Oxidative Phosphorylation & Mitochondrial Respiration
4	Oxidative Phosphorylation & Mitochondrial Respiration	4	-4	4	-0.5901	0	COX8C|SNCA|CYC1|CYCS|DGUOK|DNAJC15|VPS54|ETFRF1|GHITM|DLD|ENOX2|MT-CO1|MT-CO2|NDOR1|MT-CO3|PDIA5|MT-CYB|WDR93|MT-ND1|FDX2|MT-ND2|MT-ND3|MT-ND4|MT-ND4L|MT-ND5|ISCU|MT-ND6|MTCH2|MTCO2P12|NDUFAB1|NDUFA1|ETFDH|NDUFA10|IMMP2L|NDUFA11|NDUFA12|NDUFA2|NDUFA3|PUM2|NDUFA4|NDUFA5|THAP11|NDUFA6|NDUFA7|NDUFA8|NDUFA9|NDUFAF1|NDUFB1|NDUFB10|NDUFB2|NDUFB3|NDUFB4|NDUFB5|NDUFB6|NDUFB7|MYBBP1A|NDUFB8|NDUFB9|NDUFC1|…	127	GOBP_ELECTRON_TRANSPORT_CHAIN	-2.1545	0	GOBP_ELECTRON_TRANSPORT_CHAIN	ELECTRON TRANSPORT CHAIN	Oxidative Phosphorylation & Mitochondrial Respiration
4	Oxidative Phosphorylation & Mitochondrial Respiration	4	-4	4	-0.435	0.0007	STBD1|ACTN3|ADHFE1|COL6A1|ABCD1|DLD|KL|DLST|WDR45|WDR45B|IDH1|WIPI1|IDH2|IFNG|KGD4|OGDH|OGDHL|COMT|ACADVL|ACSM1|FXN|IRS2|ISCU|NDUFAB1|SORBS1|PNPT1|PUM2|AGL|MIR15B|CYP1A2|EPM2AIP1|MYBBP1A|SLC25A25|SUCLA2|SUCLG1|G6PC1|SUCLG2|GYG1|GYG2|GYS1|GYS2|AK4|MIR1271|NHLRC1|SLC25A23|PGM2|PPP1R3A|PPP1R3B|PPP1R3C|PPP1R3D|PPP1CC|PPP1R3E|PPP1R3F|PPP1R3G|INSR|TRAP1|MLXIPL|MTLN|UGP2|ACADM|CAVIN3|PHKA1|MIR210|PHKG2|…	348	GOBP_ENERGY_DERIVATION_BY_OXIDATION_OF_ORGANIC_COMPOUNDS	-1.7681	0	GOBP_ENERGY_DERIVATION_BY_OXIDATION_OF_ORGANIC_COMPOUNDS	ENERGY DERIVATION BY OXIDATION OF ORGANIC COMPOUNDS	Oxidative Phosphorylation & Mitochondrial Respiration
4	Oxidative Phosphorylation & Mitochondrial Respiration	4	-4	4	-0.4393	0	ALDH1L1|ALDH1L2|STAT3|ADHFE1|COL6A1|ABCD1|DLD|DLST|IDH1|IDH2|KGD4|OGDH|ENOX2|OGDHL|NDOR1|PDIA5|WDR93|HIF1A|FDX2|ACSM1|FXN|IRS2|ISCU|NDUFAB1|SLC27A5|SORBS1|PNPT1|PUM2|THAP11|AGL|OXCT1|MIR15B|SRC|PPARD|EPM2AIP1|MYBBP1A|SLC25A25|SUCLA2|SUCLG1|G6PC1|SUCLG2|GYG1|GYG2|GYS1|GYS2|AK4|MIR1271|NHLRC1|SLC25A23|PGD|PGM2|PPP1R3A|PPP1R3B|PPP1R3C|PPP1R3D|PPP1R3E|PPP1R3F|PPP1R3G|PRPS2|INSR|TRAP1|MLXIPL|MTLN|UGP2…	481	GOBP_GENERATION_OF_PRECURSOR_METABOLITES_AND_ENERGY	-1.8369	0	GOBP_GENERATION_OF_PRECURSOR_METABOLITES_AND_ENERGY	GENERATION OF PRECURSOR METABOLITES AND ENERGY	Oxidative Phosphorylation & Mitochondrial Respiration
4	Oxidative Phosphorylation & Mitochondrial Respiration	3.30103	-3.30103	3.30103	-0.6005	0.0121	SNCA|DNAJC15|DLD|MT-ND1|MT-ND2|MT-ND3|MT-ND4|MT-ND4L|MT-ND5|ISCU|MT-ND6|NDUFAB1|NDUFA1|NDUFA10|NDUFA11|NDUFA2|NDUFA3|NDUFA4|NDUFA5|NDUFA6|NDUFA7|NDUFA8|NDUFA9|NDUFAF1|NDUFB1|NDUFB10|NDUFB2|NDUFB3|NDUFB4|NDUFB5|NDUFB6|NDUFB7|NDUFB8|NDUFB9|NDUFC1|NDUFC2|NDUFC2-KCTD14|NDUFS1|NDUFS2|NDUFS3|NDUFS4|NDUFS5|NDUFS6|NDUFS7|NDUFS8|NDUFV1|NDUFV2|NDUFV3|PINK1|COQ9|PARK7|MIR210	52	GOBP_MITOCHONDRIAL_ELECTRON_TRANSPORT_NADH_TO_UBIQUINONE	-1.9036	0.0005	GOBP_MITOCHONDRIAL_ELECTRON_TRANSPORT_NADH_TO_UBIQUINONE	MITOCHONDRIAL ELECTRON TRANSPORT NADH TO UBIQUINONE	Oxidative Phosphorylation & Mitochondrial Respiration
4	Oxidative Phosphorylation & Mitochondrial Respiration	2.85387	-2.85387	2.85387	-0.4705	0.0229	STAT3|UCK2|STOML2|DNAJC30|ALDOA|MT-ATP6|MT-ATP8|MT-ND1|MT-ND2|MT-ND3|MT-ND4|MT-ND4L|MT-ND5|MT-ND6|NDUFAB1|NDUFA1|NDUFA10|CTPS1|NDUFA11|ADK|NDUFA12|NDUFA13|NDUFA2|NDUFA3|TYMS|NUDT2|NDUFA5|ATP5MC1|NDUFA6|TREM2|ATP5MC2|NDUFA7|ATP5MC3|NDUFA8|ATP5MGL|NDUFA9|UCK1|ATP5MJ|UCKL1|ATP5MK|NDUFB1|ATP6V0C|NDUFB10|TBPL1|COX11|NDUFB11|DMAC2L|MIR675|NDUFB2|LDHC|NDUFB3|NDUFB4|PID1|NDUFB5|PRKAG2|NDUFB6|TAFAZZIN|NDU…	129	GOBP_NUCLEOSIDE_TRIPHOSPHATE_BIOSYNTHETIC_PROCESS	-1.6852	0.0014	GOBP_NUCLEOSIDE_TRIPHOSPHATE_BIOSYNTHETIC_PROCESS	NUCLEOSIDE TRIPHOSPHATE BIOSYNTHETIC PROCESS	Oxidative Phosphorylation & Mitochondrial Respiration
4	Oxidative Phosphorylation & Mitochondrial Respiration	3.52288	-3.52288	3.52288	-0.4105	0.0093	STAT3|UCK2|ACTN3|COL6A1|HSPA1A|HSPA1B|HSPA8|ALDOA|IFNG|OGDH|OGDHL|HIF1A|TPI1|NDUFAB1|SRC|SLC25A25|AK1|AK2|AK3|AK4|AK5|LETMD1|LIPA|TGFB1|BLOC1S6|GALK1|DDIT4|INSR|MAP2K1|LRRK2|MLXIPL|TSPO|GPI|TMSB4X|ATP6V1B1|HK2|CTNS|FKRP|ENO1|PGK1|CTPS2|ATP1B1|HTR2A|OGT|JMJD8|DTYMK|DUT|PARP1|CMPK2|NCOR1|FIGNL1|FLCN|PPARA|ENTPD7|KAT2B|PPP2CA|ALDOB|P2RX7|UCHL1|GPD1|ATP1A2|ANTKMT|ARL2|GUK1|ATP5F1A|ATP5F1B|ATP5F1C|ATP…	283	GOBP_NUCLEOSIDE_TRIPHOSPHATE_METABOLIC_PROCESS	-1.6347	0.0003	GOBP_NUCLEOSIDE_TRIPHOSPHATE_METABOLIC_PROCESS	NUCLEOSIDE TRIPHOSPHATE METABOLIC PROCESS	Oxidative Phosphorylation & Mitochondrial Respiration
4	Oxidative Phosphorylation & Mitochondrial Respiration	4	-4	4	-0.5802	0	COX8C|SNCA|CYC1|ACTN3|CYCS|STOML2|DGUOK|DNAJC15|DNAJC30|ETFRF1|GHITM|ABCD1|DLD|MACROH2A1|MLDHR|MT-ATP6|MT-ATP8|MT-CO1|MT-CO2|MT-CO3|MT-CYB|MT-ND1|MT-ND2|FXN|MT-ND3|MT-ND4|MT-ND4L|MT-ND5|ISCU|MT-ND6|MTCH2|MTCO2P12|NDUFAB1|NDUFA1|NDUFA10|NDUFA11|NDUFA12|NDUFA13|NDUFA2|NDUFA3|NDUFA4|NDUFA5|NDUFA6|NDUFA7|NDUFA8|NDUFA9|NDUFAF1|NDUFB1|NDUFB10|NDUFB11|NDUFB2|NDUFB3|NDUFB4|NDUFB5|NDUFB6|NDUFB7|NDUFB8|NDU…	151	GOBP_OXIDATIVE_PHOSPHORYLATION	-2.137	0	GOBP_OXIDATIVE_PHOSPHORYLATION	OXIDATIVE PHOSPHORYLATION	Oxidative Phosphorylation & Mitochondrial Respiration
4	Oxidative Phosphorylation & Mitochondrial Respiration	3.52288	-3.52288	3.52288	-0.5904	0.0084	STOML2|DNAJC30|MT-ATP6|MT-ATP8|MT-ND1|MT-ND2|MT-ND3|MT-ND4|MT-ND4L|MT-ND5|MT-ND6|NDUFAB1|NDUFA1|NDUFA10|NDUFA11|NDUFA12|NDUFA13|NDUFA2|NDUFA3|NDUFA5|ATP5MC1|NDUFA6|ATP5MC2|NDUFA7|ATP5MC3|NDUFA8|ATP5MGL|NDUFA9|ATP5MJ|ATP5MK|NDUFB1|ATP6V0C|NDUFB10|NDUFB11|NDUFB2|NDUFB3|NDUFB4|NDUFB5|NDUFB6|NDUFB7|VPS9D1|NDUFB8|NDUFB9|NDUFC1|NDUFC2|NDUFS1|NDUFS2|NDUFS3|NDUFS4|NDUFS5|NDUFS6|NDUFS7|NDUFS8|NDUFV1|NDUFV…	76	GOBP_PROTON_MOTIVE_FORCE_DRIVEN_ATP_SYNTHESIS	-1.9001	0.0003	GOBP_PROTON_MOTIVE_FORCE_DRIVEN_ATP_SYNTHESIS	PROTON MOTIVE FORCE DRIVEN ATP SYNTHESIS	Oxidative Phosphorylation & Mitochondrial Respiration
4	Oxidative Phosphorylation & Mitochondrial Respiration	2.56864	-2.56864	2.56864	-0.4268	0.0338	STAT3|UCK2|MTHFD1|STOML2|DNAJC30|ADSS1|ADSS2|ALDOA|MT-ATP6|MT-ATP8|MT-ND1|MT-ND2|MT-ND3|MT-ND4|MT-ND4L|MT-ND5|MT-ND6|ADCY9|NDUFAB1|NDUFA1|NPR1|NDUFA10|CTPS1|NDUFA11|ADK|NDUFA12|APRT|NDUFA13|ATIC|NDUFA2|ADCY5|GART|NDUFA3|ADCY6|NUDT2|NDUFA5|PAICS|ATP5MC1|NDUFA6|PPAT|TREM2|AMPD3|ATP5MC2|NDUFA7|AMPD1|ATP5MC3|NDUFA8|AMPD2|ATP5MGL|NDUFA9|UCK1|ADCY1|ATP5MJ|UCKL1|ADCY2|ATP5MK|NDUFB1|ADCY4|ATP6V0C|NDUFB10…	182	GOBP_RIBOSE_PHOSPHATE_BIOSYNTHETIC_PROCESS	-1.5961	0.0027	GOBP_RIBOSE_PHOSPHATE_BIOSYNTHETIC_PROCESS	RIBOSE PHOSPHATE BIOSYNTHETIC PROCESS	Oxidative Phosphorylation & Mitochondrial Respiration
4	Oxidative Phosphorylation & Mitochondrial Respiration	2.82391	-2.82391	2.82391	-0.3714	0.0239	STAT3|UCK2|MTHFD1|COL6A1|OGDH|OGDHL|HIF1A|NDUFAB1|SRC|SLC25A25|AK1|AK2|AK3|AK4|AK5|TGFB1|PRPS1|PRPS1L1|PRPS2|PRPSAP1|INSR|MAP2K1|PRPSAP2|MLXIPL|TSPO|GPI|RORA|TMSB4X|ATP6V1B1|DLG2|ADCY7|HK2|AK9|CTNS|FKRP|PGK1|CDA|CMPK1|CTPS2|DCK|ATP1B1|HTR2A|DHODH|JMJD8|ENTPD5|CACNB4|PPARA|ENTPD7|KAT2B|P2RX7|UCHL1|GMPS|GUCY1A1|GUCY1A2|GUCY1B1|GUCY2C|ADSL|ATP1A2|GUCY2D|ANTKMT|GUCY2F|ARL2|GUK1|ATP5F1A|ATP5F1B|ATP5F1…	385	GOBP_RIBOSE_PHOSPHATE_METABOLIC_PROCESS	-1.5123	0.0015	GOBP_RIBOSE_PHOSPHATE_METABOLIC_PROCESS	RIBOSE PHOSPHATE METABOLIC PROCESS	Oxidative Phosphorylation & Mitochondrial Respiration
35	Receptor Transport and Membrane Localization	3.52288	-3.52288	3.52288	-0.4094	0.0079	SYNE3|SEC61G|SGTB|SDCBP|VAMP2|VPS35|VAMP3|ACSL3|VAMP4|OPTN|EMC10|ZDHHC20|ZDHHC4|TIMM10|TIMM13|TOMM7|ITGB2|TIMM22|TIMM29|TIMM8A|ERBB2|TIMM8B|PEX5|TIMM9|MACF1|TOMM20|ANKRD13C|ARHGAP44|ITGAM|SPTBN1|TOMM22|TOMM40|TOMM5|TOMM6|TRMT10B|GET4|GORASP2|GRIPAP1|PREPL|NSF|VAMP5|RAB11FIP3|ATP2C1|ZDHHC14|ZDHHC22|RAB11A|ZDHHC23|ZDHHC24|ZDHHC6|TAOK2|BRAF|LYPLAL1|MTCH1|ZDHHC21|VPS37B|GOLGA4|PDZK1|BBS1|BBS2|COLQ|NC…	279	GOBP_ESTABLISHMENT_OF_PROTEIN_LOCALIZATION_TO_MEMBRANE	-1.6302	0.0003	GOBP_ESTABLISHMENT_OF_PROTEIN_LOCALIZATION_TO_MEMBRANE	ESTABLISHMENT OF PROTEIN LOCALIZATION TO MEMBRANE	Receptor Transport and Membrane Localization
35	Receptor Transport and Membrane Localization	2.72125	-2.72125	2.72125	-0.7189	0.0282	GRIP2|NETO1|GRIP1|LRRC7|SACM1L|NSG1|RAB11A|SLC1A1|RAB8A|AP3D1|HIP1|STX3|ARHGAP44|CLSTN1|VPS35|RAB7A|CPLX1|VAMP4|SCRIB|GRIPAP1	20	GOBP_NEUROTRANSMITTER_RECEPTOR_TRANSPORT	-1.8421	0.0019	GOBP_NEUROTRANSMITTER_RECEPTOR_TRANSPORT	NEUROTRANSMITTER RECEPTOR TRANSPORT	Receptor Transport and Membrane Localization
6	Regulaiton of gliogenesis	2.63827	2.63827	2.63827	0.4214	0.0303	DICER1|GPM6B|COL6A1|GRB2|HRAS|IFNG|MIR181C|TLR2|TLR4|TTBK1|CDK6|ILK|LAMB2|LAMC3|AKT1|PLP1|POU3F2|MXRA8|ROR1|TSPAN2|ITGB4|VIM|IL1B|NKX2-2|NCMAP|IFNGR1|ERBB2|ERCC2|ID2|TREM2|ARHGEF10|KRAS|CCDC39|LPAR1|LRP1|MAPT|APP|ADGRG6|PALS1|NSUN5|POU3F1|TGFB1|ASCL1|MAP2K1|LYN|MDK|MIR142|ID4|MAPK1|PARD3|NRROS|LDLR|C1QA|SMO|MAL|GRN|PPP3R1|SOX10|NDRG1|MYOC|HES5|ZNF488|C5AR1|ADORA2A|NAGLU|CNTN2|CDK5|WASF3|ANO1|DLL1…	136	GOBP_GLIAL_CELL_DEVELOPMENT	1.6574	0.0023	GOBP_GLIAL_CELL_DEVELOPMENT	GLIAL CELL DEVELOPMENT	Regulaiton of gliogenesis
6	Regulaiton of gliogenesis	4	4	4	0.4151	0.0012	DICER1|STAT3|CDH2|COL6A1|VTN|IFNG|EPHA4|ILK|ITGB4|IL1B|ERBB2|HMGA2|ERCC2|ID2|ARHGEF10|CCDC39|SOX8|MYD88|PTPN11|QKI|DTX1|TGFB1|ASCL1|MAP2K1|LYN|MDK|GCM1|NR3C1|MAPK1|GPC1|LDLR|SMO|RNF112|GRN|SOX10|SOX9|HDAC1|NDRG1|HES5|NFE2L1|ADORA2A|LAMA2|CNP|NAGLU|CNTN2|CDK5|PLPP3|DAB1|WASF3|GFAP|METRN|FKRP|WDR1|ERBB3|HDAC2|B4GALT5|B4GALT6|NR1D1|CXCR4|LGI4|CLCF1|CERS5|OLIG1|CERS6|NCSTN|OLIG2|CNTNAP1|FA2H|DRD1|PRD…	263	GOBP_GLIAL_CELL_DIFFERENTIATION	1.7827	0	GOBP_GLIAL_CELL_DIFFERENTIATION	GLIAL CELL DIFFERENTIATION	Regulaiton of gliogenesis
6	Regulaiton of gliogenesis	2.37675	2.37675	2.37675	0.5135	0.0444	RELN|STAP1|NR2E1|CDK5|CDK5R1|DAB1|MATN2|CTNNB1|CCR2|RRAS|ATP1B2|MMP14|NDN|IDH2|RRAS2|EPHA4|AZU1|SCRIB|NTN1|CERS2|VCAN|CSF1|HEXB|SUN1|CX3CL1|PAFAH1B1|CX3CR1|FOXG1|SOCS7|TREM2|BMERB1|SRGAP2C|LAMB1|NF1|MIR221|MIR222|SRGAP2|CRKL|ZMIZ1|LRP8|DAB2IP|CCL2|ADGRG1|GPR183|WDR47|MBOAT7|CD9|CDK5R2|APCDD1|TGFB2|P2RY1|P2RY12|RTN4|TSPO|DISC1|P2RX4|SUN2|SYNE2|COL3A1|CCL3|CSPG4|GLI3|PTPRB	63	GOBP_GLIAL_CELL_MIGRATION	1.7166	0.0042	GOBP_GLIAL_CELL_MIGRATION	GLIAL CELL MIGRATION	Regulaiton of gliogenesis
6	Regulaiton of gliogenesis	4	4	4	0.3905	0.0004	DICER1|STAT3|CDH2|VEGFC|COL6A1|VTN|IDH2|IFNG|EPHA4|ILK|CSF1|ITGB4|IL1B|EZH2|ERBB2|HMGA2|ERCC2|ID2|ARHGEF10|MIR221|MIR222|SRGAP2|E2F1|CCDC39|SOX8|CREB1|MYD88|PTPN11|QKI|DTX1|RNF10|TGFB1|ASCL1|PPP1CC|TGFB2|MAP2K1|LYN|MDK|GCM1|NR3C1|MAPK1|TSPO|DISC1|GPC1|LDLR|SMO|RNF112|GRN|LRP2|SOX10|SOX9|HDAC1|MIR146A|NDRG1|ATXN1|HES5|NFE2L1|ADORA2A|UFL1|ASCL2|LAMA2|CNP|NAGLU|CNTN2|CDK5|PLPP3|CDK5R1|DAB1|WASF3|GFA…	353	GOBP_GLIOGENESIS	1.7581	0	GOBP_GLIOGENESIS	GLIOGENESIS	Regulaiton of gliogenesis
6	Regulaiton of gliogenesis	3.69897	3.69897	3.69897	0.5088	0.007	CLCN2|GPM6B|CTNNB1|HES1|VTN|IL34|ZNF365|PLP1|TNFRSF21|TSPAN2|NKX2-2|ERBB2|ERCC2|ID2|NKX2-1|DUSP15|GPR17|CCDC39|SOX8|LPAR1|GSX2|QKI|PAX6|NSUN5|OPALIN|TGFB1|ASCL1|LYN|MDK|MTOR|ID4|SUZ12|MAL|SOX10|SOX9|HDAC1|HES5|ZNF488|GLI3|CNP|CNTN2|CDK5|BNIP3|WASF3|BOK|WDR1|HDAC2|ABCA2|B4GALT5|B4GALT6|CXCR4|CERS5|OLIG1|CERS6|NCSTN|OLIG2|CNTNAP1|FA2H|PRDM8|SHH|DUSP10|NOTCH1|DRD3|SOX11|CLU|TP73|DAAM2|PRMT5|PTEN|NF1…	109	GOBP_OLIGODENDROCYTE_DIFFERENTIATION	1.902	0.0002	GOBP_OLIGODENDROCYTE_DIFFERENTIATION	OLIGODENDROCYTE DIFFERENTIATION	Regulaiton of gliogenesis
6	Regulaiton of gliogenesis	2.76955	2.76955	2.76955	0.3091	0.0257	DICER1|RND2|SS18L1|TNFRSF11A|RUFY3|TNFSF11|SNW1|TNFSF4|DSCAM|S1PR2|VNN1|CDH4|CDH5|SEMA5A|EPHA4|NUMB|NUMBL|EGR3|STK25|HIF1A|SHANK3|ZNF335|CSF1|SLIT2|DHX36|KITLG|ID2|MACF1|MEGF8|ZFP36L1|POU4F2|MIR221|SRF|MIR222|E2F1|SOX8|STAU2|SPI1|QKI|FZD3|FZD4|TGFB1|ASCL1|MAP2K1|MDK|SEMA4D|GLI2|TRPC5|TSPO|SEMA7A|SMO|XBP1|SOX10|HDAC1|CD27|ATXN1|TRIM32|TWF2|TYROBP|HOXA11|NEFL|RAB21|BRD2|BRD4|CCL19|HDAC2|CD4|CD74|CD…	450	GOBP_POSITIVE_REGULATION_OF_CELL_DEVELOPMENT	1.437	0.0017	GOBP_POSITIVE_REGULATION_OF_CELL_DEVELOPMENT	POSITIVE REGULATION OF CELL DEVELOPMENT	Regulaiton of gliogenesis
6	Regulaiton of gliogenesis	2.48149	2.48149	2.48149	0.587	0.0383	PTN|DICER1|PTPRZ1|BMP2|GSX2|MAG|NKX6-1|EGR2|CLCN2|HES1|QKI|MYRF|NKX6-2|HDAC2|RELA|IL34|TGFB1|MDK|TTBK1|ZNF365|MTOR|TENM4|CXCR4|CLCF1|MIR142|OLIG2|IL6ST|RHEB|NKX2-2|SERPINE2|RNF112|ID2|SHH|HDAC1|NOTCH1|TP73|PRMT5|ZNF488|BIN1|LIF|TNFRSF1B|SPINT1|DAG1	43	GOBP_POSITIVE_REGULATION_OF_GLIAL_CELL_DIFFERENTIATION	1.7541	0.0033	GOBP_POSITIVE_REGULATION_OF_GLIAL_CELL_DIFFERENTIATION	POSITIVE REGULATION OF GLIAL CELL DIFFERENTIATION	Regulaiton of gliogenesis
6	Regulaiton of gliogenesis	2.60206	2.60206	2.60206	0.5278	0.0313	DICER1|BMP2|VEGFC|GFAP|MYB|EGR2|CLCN2|HES1|HDAC2|IL34|SLC7A5|NTN1|TTBK1|ZNF365|CXCR4|ETV5|LTA|CLCF1|MECP2|OLIG2|IL1B|NKX2-2|SERPINE2|ID2|SHH|NOTCH1|TP73|PRMT5|PLAG1|KRAS|SPINT1|MIR221|MIR222|PRKCH|E2F1|SOX8|PTN|PTPRZ1|GSX2|MAG|NKX6-1|TNF|QKI|MYRF|NKX6-2|RELA|TGFB1|PPP1CC|PRKCI|LYN|MDK|MTOR|TENM4|MIR125B1|MIR142|IL6|TSPO|IL6ST|RHEB|RNF112|LRP2|SOX10|HDAC1|ATXN1|ZNF488|BIN1|LIF|TNFRSF1B|UFL1|DAG1	70	GOBP_POSITIVE_REGULATION_OF_GLIOGENESIS	1.7756	0.0025	GOBP_POSITIVE_REGULATION_OF_GLIOGENESIS	POSITIVE REGULATION OF GLIOGENESIS	Regulaiton of gliogenesis
6	Regulaiton of gliogenesis	2.39794	2.39794	2.39794	0.3373	0.0429	DICER1|RND2|SS18L1|VEGFC|RUFY3|SNW1|DSCAM|CDH4|SEMA5A|IFNG|WNT2|EPHA4|NUMB|WNT3|NUMBL|WNT3A|STK25|HIF1A|SHANK3|XRCC2|ZNF335|IL1B|SLIT2|DHX36|BCL11A|ID2|MACF1|CAPRIN2|MEGF8|POU4F2|MIR221|SRF|MIR222|E2F1|SOX8|STAU2|TRAK1|AMIGO1|QKI|FZD3|FZD4|TGFB1|ASCL1|PPP1CC|CDKL3|CDKL5|BRAF|CHODL|MAP2K1|LYN|MDK|SEMA4D|MAP3K13|TRPC5|TSPO|DISC1|NGF|SEMA7A|SMO|RNF112|LRP2|SOX10|PLXNB1|HDAC1|ATXN1|GOLGA4|TRIM32|CUL7…	233	GOBP_POSITIVE_REGULATION_OF_NEUROGENESIS	1.4453	0.004	GOBP_POSITIVE_REGULATION_OF_NEUROGENESIS	POSITIVE REGULATION OF NEUROGENESIS	Regulaiton of gliogenesis
6	Regulaiton of gliogenesis	3.69897	3.69897	3.69897	0.5929	0.0074	CNTN2|DICER1|BMP2|NR2E1|DAB1|EGR2|CLCN2|CTNNB1|HES1|MYCN|WDR1|MIR181C|EPHA4|HDAC2|LIN28A|IL34|NR1D1|TTBK1|ZNF365|CXCR4|CLCF1|OLIG2|TNFRSF21|NKX2-2|SERPINE2|NOG|HMGA2|ID2|SHH|DUSP10|NOTCH1|DRD3|TREM2|TP73|DAAM2|PRMT5|DUSP15|NF1|SPINT1|PTN|PTPRZ1|GSX2|MAG|NKX6-1|QKI|MYRF|NKX6-2|GPR37L1|F2|OPALIN|SLC45A3|RELA|TGFB1|MDK|MTOR|TENM4|MIR142|ID4|IL6|NTRK3|IL6ST|MIR181B1|RHEB|LDLR|SOX1|RNF112|CDK1|DLX1|DL…	77	GOBP_REGULATION_OF_GLIAL_CELL_DIFFERENTIATION	1.9603	0.0002	GOBP_REGULATION_OF_GLIAL_CELL_DIFFERENTIATION	REGULATION OF GLIAL CELL DIFFERENTIATION	Regulaiton of gliogenesis
6	Regulaiton of gliogenesis	2.63827	2.63827	2.63827	0.4818	0.0303	DICER1|BMP2|VEGFC|CLCN2|CTNNB1|HES1|IDH2|MIR181C|IL34|TTBK1|ZNF365|ETV5|IL1B|EZH2|NKX2-2|SERPINE2|HMGA2|ID2|TREM2|KRAS|MIR221|MIR222|E2F1|SOX8|GSX2|QKI|RNF10|TGFB1|PPP1CC|LYN|MDK|MTOR|MIR142|ID4|TSPO|LDLR|RNF112|LRP2|SOX10|HDAC1|MIR146A|ATXN1|HES5|ZNF488|BIN1|LIF|TP53|UFL1|ASCL2|NF2|NR2E1|DAB1|GFAP|MYB|EGR2|MYCN|HDAC2|LIN28A|SLC7A5|NR1D1|NTN1|CERS2|CXCR4|LTA|CLCF1|MECP2|OLIG2|NOG|SHH|SKI|DUSP10|N…	109	GOBP_REGULATION_OF_GLIOGENESIS	1.7577	0.0023	GOBP_REGULATION_OF_GLIOGENESIS	REGULATION OF GLIOGENESIS	Regulaiton of gliogenesis
6	Regulaiton of gliogenesis	2.49485	2.49485	2.49485	0.3102	0.0369	DICER1|RND2|SS18L1|DLL3|DLL4|VEGFC|RUFY3|S100A10|SNW1|DSCAM|CDH4|ULK1|ULK2|FERD3L|SEMA5A|IDH2|IFNG|WNT2|EPHA4|NUMB|VSX2|WNT3|NUMBL|WNT3A|WNT7A|STK25|HIF1A|SHANK3|XRCC2|YAP1|SYNGAP1|ZNF335|IL1B|SLIT2|DHX36|EZH2|HMGA2|BCL11A|ID2|IFRD1|MACF1|CAPRIN2|MEGF8|POU4F2|MIR221|SRF|MIR222|E2F1|SOX8|SPART|STAU2|TRAK1|DRAXIN|TRAK2|AMIGO1|HLTF|QKI|DCC|BHLHE40|BHLHE41|DYNLT1|RNF10|BTG2|FZD3|FZD4|TGFB1|ASCL1|FEZF…	374	GOBP_REGULATION_OF_NEUROGENESIS	1.4152	0.0032	GOBP_REGULATION_OF_NEUROGENESIS	REGULATION OF NEUROGENESIS	Regulaiton of gliogenesis
6	Regulaiton of gliogenesis	4	4	4	0.7057	0.0032	PTN|PTPRZ1|GSX2|NKX6-1|CLCN2|CTNNB1|HES1|QKI|MYRF|NKX6-2|OPALIN|SLC45A3|WDR1|HDAC2|IL34|MDK|ZNF365|MTOR|TENM4|CXCR4|ID4|OLIG2|TNFRSF21|RHEB|NKX2-2|SOX1|ID2|SHH|DLX1|DLX2|DUSP10|HDAC1|NOTCH1|DRD3|TP73|DAAM2|PRMT5|TMEM98|HES5|ZNF488|DUSP15|NF1|TNFRSF1B|DAG1	44	GOBP_REGULATION_OF_OLIGODENDROCYTE_DIFFERENTIATION	2.0784	0.0001	GOBP_REGULATION_OF_OLIGODENDROCYTE_DIFFERENTIATION	REGULATION OF OLIGODENDROCYTE DIFFERENTIATION	Regulaiton of gliogenesis
33	Regulaiton of Notch Signaling	4	4	4	0.4175	0.0046	GRIP2|BMP2|STAT3|DLL3|TTYH1|DLL4|GATA2|TSPEAR|WDR12|HES1|CDH6|GOT1|IL2RA|MMP14|WNT1|FOXC1|CTBP1|EGFL7|SLC35C1|SLC35C2|YAP1|CDK6|YJEFN3|AKT1|ITGB1BP1|FBXW7|AAK1|TCIM|BMP2K|EPN1|EPN2|PLN|CCDC85C|CDKN1B|DLK1|KIT|MAGEA1|NLE1|ETV2|MESP1|NOTCH2|NOTCH3|KRT19|NOTCH4|SRC|ONECUT1|NRARP|LLGL1|LLGL2|METTL3|RITA1|CBFA2T2|GSX2|OVOL2|ARRB1|HERC2|APP|FOXA1|NOTCH2NLA|NOTCH2NLB|NOTCH2NLC|NEURL1|DTX1|BCL6|TGFB1|ASC…	191	GOBP_NOTCH_SIGNALING_PATHWAY	1.7494	0.0001	GOBP_NOTCH_SIGNALING_PATHWAY	NOTCH SIGNALING PATHWAY	Regulaiton of Notch Signaling
33	Regulaiton of Notch Signaling	2.67778	2.67778	2.67778	0.5749	0.0289	STAT3|DLL4|DLL1|NEPRO|JAG1|ROBO1|ROBO2|HES1|ACVRL1|WNT1|NOD2|SLC35C2|YAP1|GDF2|ITGB1BP1|PDCD10|AAK1|BMP2K|EPN2|NOTCH1|KIT|TSPAN14|MESP1|TSPAN5|SRC|LFNG|ZMIZ1|GSX2|RFNG|NOTCH2NLA|NOTCH2NLB|NOTCH2NLC|MFNG|ASCL1|ENHO|TGFB2|PRKCI|GATA5|CNTN6|MIR126|IL6ST|TM2D3|POGLUT1|JAG2|MIR212|FGF10|HES5|NOS3|TP63|CCN3	50	GOBP_POSITIVE_REGULATION_OF_NOTCH_SIGNALING_PATHWAY	1.7783	0.0021	GOBP_POSITIVE_REGULATION_OF_NOTCH_SIGNALING_PATHWAY	POSITIVE REGULATION OF NOTCH SIGNALING PATHWAY	Regulaiton of Notch Signaling
33	Regulaiton of Notch Signaling	3.52288	3.52288	3.52288	0.4867	0.0091	STAT3|DLL3|DLL4|GATA2|TSPEAR|HES1|MMP14|WNT1|EGFL7|SLC35C1|SLC35C2|YAP1|YJEFN3|AKT1|ITGB1BP1|FBXW7|AAK1|TCIM|BMP2K|EPN2|DLK1|KIT|MAGEA1|NLE1|MESP1|SRC|NRARP|LLGL1|LLGL2|METTL3|RITA1|CBFA2T2|GSX2|OVOL2|ARRB1|HERC2|NOTCH2NLA|NOTCH2NLB|NOTCH2NLC|NEURL1|DTX1|BCL6|ASCL1|TGFB2|GATA5|LRRK2|CNTN6|MIR141|GAS2|POFUT1|TM2D3|POGLUT1|POSTN|JAG2|WWP2|HES5|MIR200C|NOS3|HEY1|HIF1AN|HEY2|BEND6|DLL1|NEPRO|NFKBIA|J…	105	GOBP_REGULATION_OF_NOTCH_SIGNALING_PATHWAY	1.8492	0.0003	GOBP_REGULATION_OF_NOTCH_SIGNALING_PATHWAY	REGULATION OF NOTCH SIGNALING PATHWAY	Regulaiton of Notch Signaling
23	Regulation canonical wnt signaling	2.38722	2.38722	2.38722	0.3015	0.044	INVS|JRK|DKK1|LGR5|DKK4|LIMD1|LYPD6|CDH2|MIR1260B|DLX5|MIR183|MIR203A|MIR346|COL6A1|MIR498|VPS4B|CDH3|MIR501|MIR665|NKD2|PLEKHA4|PRDM15|PYGO1|SEMA5A|WLS|FERMT1|PYGO2|WNT1|RBMS3|WNT16|FOLR1|RNF146|WNT2|RNF220|SFRP1|WNT2B|EDA|RPS12|WNT3|RSPO1|WNT3A|GPC3|SCEL|VPS35|WNT6|SCYL2|WNT10A|WNT7A|SDC1|WNT7B|WNT8A|SHISA3|WNT9A|WNT9B|SOST|SPIN4|WWTR1|YAP1|TBL1X|ILK|TCF7|TCF7L1|AMER1|ISL1|RBX1|TLE4|TLE7|TMEM13…	330	GOBP_CANONICAL_WNT_SIGNALING_PATHWAY	1.3662	0.0041	GOBP_CANONICAL_WNT_SIGNALING_PATHWAY	CANONICAL WNT SIGNALING PATHWAY	Regulation canonical wnt signaling
23	Regulation canonical wnt signaling	2.88606	2.88606	2.88606	0.4157	0.0216	INVS|BMP2|DKK1|STK11|DKK4|LIMD1|CDH2|IGFBP2|MIR203A|CTNNB1|MIR498|LMBR1L|MIR665|NKD2|SOX2|FERMT1|RBMS3|SFRP1|GPC3|SCYL2|SHISA3|SOST|WWTR1|AMER1|ISL1|RBX1|TLE4|TLE7|TMEM131L|TMEM170B|TMEM88|TMEM88B|SMAD4|TPBGL|UBAC2|LRP4|PTPRU|NKD1|WNT5B|APC2|MCC|NOTUM|FRZB|MESP1|CHD8|FZD1|LATS1|SHISA6|MIR19B1|TMEM196|MIR29B1|MIR29C|TLE5|DRAXIN|EMD|MAD2L2|MAPK14|NPPA|APP|LATS2|FOXO3|PFDN5|APOE|FUZ|FZD6|SDHAF2|SIAH…	149	GOBP_NEGATIVE_REGULATION_OF_CANONICAL_WNT_SIGNALING_PATHWAY	1.6543	0.0013	GOBP_NEGATIVE_REGULATION_OF_CANONICAL_WNT_SIGNALING_PATHWAY	NEGATIVE REGULATION OF CANONICAL WNT SIGNALING PATHWAY	Regulation canonical wnt signaling
23	Regulation canonical wnt signaling	2.69897	2.69897	2.69897	0.3345	0.0283	INVS|JRK|DKK1|LGR5|DKK4|LIMD1|LYPD6|CDH2|MIR1260B|DLX5|MIR183|MIR203A|MIR346|MIR498|CDH3|MIR501|MIR665|NKD2|PLEKHA4|PRDM15|SEMA5A|WLS|FERMT1|RBMS3|FOLR1|RNF146|RNF220|SFRP1|EDA|RPS12|RSPO1|WNT3A|GPC3|SCEL|VPS35|SCYL2|SHISA3|SOST|SPIN4|WWTR1|YAP1|TBL1X|ILK|AMER1|ISL1|RBX1|TLE4|TLE7|TMEM131L|TMEM170B|TMEM198|TMEM88|SMAD3|TMEM88B|SMAD4|TMEM9|TNKS|TNKS2|TPBGL|UBAC2|UBR5|USP34|PTPRU|WNK2|WNT5B|CAPRIN2…	276	GOBP_REGULATION_OF_CANONICAL_WNT_SIGNALING_PATHWAY	1.4746	0.002	GOBP_REGULATION_OF_CANONICAL_WNT_SIGNALING_PATHWAY	REGULATION OF CANONICAL WNT SIGNALING PATHWAY	Regulation canonical wnt signaling
23	Regulation canonical wnt signaling	2.60206	2.60206	2.60206	0.2856	0.0318	INVS|JRK|DKK1|LGR5|DKK4|LIMD1|LYPD6|CDH2|MIR1260B|DLX5|MIR183|MIR203A|MIR346|COL6A1|MIR498|CDH3|MIR501|MIR665|NKD2|PLEKHA4|PRDM15|PYGO1|SEMA5A|FERMT1|PYGO2|VAX2|ZRANB1|RBMS3|FOLR1|RNF146|RNF220|SFRP1|EDA|RPS12|RSPO1|GPC3|SCEL|SCYL2|WNT10A|SDC1|WNT7B|SHISA3|WNT9A|SOST|WWOX|SPIN4|WWTR1|TBL1X|ILK|TCF7|TCF7L1|AMER1|ISL1|TLE4|TLE7|ITGA3|TMEM131L|TMEM170B|CCND1|TMEM198|TMEM88|CSNK2A2|SMAD3|TMEM88B|SMAD…	484	GOBP_WNT_SIGNALING_PATHWAY	1.3701	0.0025	GOBP_WNT_SIGNALING_PATHWAY	WNT SIGNALING PATHWAY	Regulation canonical wnt signaling
41	Regulation of Antigen-Triggered Inflammation	2.74473	2.74473	2.74473	0.557	0.0276	HMGB1|SPN|FURIN|CYSLTR1|SYK|HLA-DRB1|IL12B|PNMA1|CD28|HCK|IL2RA|GPX1|NLRP6|IL25|ZP3|IGHE|IGHG1|CD81|LTA|PSMA1|PSMB4|GNAS|PLCG1|NOTCH1|TREM2|TREX1|MKRN2|NOTCH2|SRC|MIR19B1|GPR17|RASGRP1|CD6|KDM6B|MAPK14|CD68|IL5RA|TNF|MIR6869|ELANE|EXT1|FCER1A|FCGR1A|FCGR1BP|HMGB2|KARS1|YES1|FCGR2A|FCGR2C|FCGR3A|FCGR3B|FUT7|PLK2|BTK|FCER1G|HLA-E|LYN|FCGR2B|MIR105-1|IL20RB|IL31RA|NPY5R|RBPJ|RHBDF2|FGR|FOSL2|MIR302E…	79	GOBP_INFLAMMATORY_RESPONSE_TO_ANTIGENIC_STIMULUS	1.7545	0.0018	GOBP_INFLAMMATORY_RESPONSE_TO_ANTIGENIC_STIMULUS	INFLAMMATORY RESPONSE TO ANTIGENIC STIMULUS	Regulation of Antigen-Triggered Inflammation
41	Regulation of Antigen-Triggered Inflammation	2.85387	2.85387	2.85387	0.7085	0.0232	SPN|FURIN|MAPK14|SYK|HLA-DRB1|IL12B|MIR6869|HCK|GPX1|NLRP6|YES1|PLK2|LYN|FCGR2B|MIR105-1|IL20RB|NPY5R|RHBDF2|FGR|PSMA1|PSMB4|MIR302E|GNAS|NPY|PLCG1|TREM2|IL10|MIR19A|MKRN2|SRC|MIR19B1|GPR17|FYN|SELENOS	34	GOBP_NEGATIVE_REGULATION_OF_INFLAMMATORY_RESPONSE_TO_ANTIGENIC_STIMULUS	1.8947	0.0014	GOBP_NEGATIVE_REGULATION_OF_INFLAMMATORY_RESPONSE_TO_ANTIGENIC_STIMULUS	NEGATIVE REGULATION OF INFLAMMATORY RESPONSE TO ANTIGENIC STIMULUS	Regulation of Antigen-Triggered Inflammation
17	Regulation of Epithelial and Endothelial Proliferation	2.82391	2.82391	2.82391	0.4343	0.0239	CDH13|VASH1|STAT3|VASH2|VEGFB|DLL4|ENG|VSTM4|SEMA5A|ECM1|ANG|EGFL7|EGR3|HIF1A|HTR2B|APOA1|EMC10|ITGA4|AGTR1|JUN|ALDH1A2|LRG1|MIR130A|MIR15B|MIR16-1|MIR222|PPARG|FGF16|FGF18|FUT2|FGFBP1|NRP2|FLT1|FLT4|APOE|FUT1|LIPA|FGFR1|TGFBR1|MDK|NR2F2|SCARB1|SIRT1|XBP1|APOH|MEF2C|MIR27A|MIR27B|MIR129-1|MIR133B|MIR146A|THBS1|MIR135B|CCL11|MIR152|MIR499A|CCL24|ADAM17|CCL26|MIR200C|MIR34A|WNT5A|HMOX1|ZNF580|POLD4…	211	GOBP_ENDOTHELIAL_CELL_PROLIFERATION	1.6943	0.0015	GOBP_ENDOTHELIAL_CELL_PROLIFERATION	ENDOTHELIAL CELL PROLIFERATION	Regulation of Epithelial and Endothelial Proliferation
17	Regulation of Epithelial and Endothelial Proliferation	4	4	4	0.3656	0.0004	CDH13|DEAF1|LGR5|STAT3|DLL4|DLX5|TNFSF11|DLX6|ENG|CDH3|EPPK1|ERBB4|SEMA5A|FERMT1|PYGO2|VDR|ECM1|EFNB2|SFRP1|IL26|GPC3|WDR48|EGFL7|HAS2|EGR3|HIF1A|HTR2B|ZEB1|IRS2|EMC10|ISL1|ITGA4|SIX4|CCND1|CLDN1|EPGN|ERRFI1|JUN|SMAD3|KRT2|LAMA5|ERBB2|HMGA2|LRG1|EREG|ID2|MARVELD3|MCC|BCL2L1|ZFP36|MIR130A|ZFP36L1|EYA1|MIR15B|MIR16-1|FAP|PPARD|MIR222|PPARG|FGF16|FGF18|FUT2|FGFBP1|FGFR2|NRP2|OVOL2|FLT1|FLT4|ANGPTL8|…	506	GOBP_EPITHELIAL_CELL_PROLIFERATION	1.6965	0	GOBP_EPITHELIAL_CELL_PROLIFERATION	EPITHELIAL CELL PROLIFERATION	Regulation of Epithelial and Endothelial Proliferation
17	Regulation of Epithelial and Endothelial Proliferation	3.09691	3.09691	3.09691	0.5068	0.0155	CDH13|HMGB1|MIR495|FGF2|MIR503|STAT3|VASH2|VEGFB|GATA2|GHSR|IGF2|NRAS|PROX1|MIRLET7B|SEMA5A|ECM1|ANG|EGFL7|EGR3|HIF1A|HTR2B|STAT5A|MYDGF|AKT1|EMC10|ITGB3|ITGA4|AGTR1|JUN|LRG1|MIR130A|MIR29A|NR4A1|NRARP|FGFBP1|NRP2|ARNT|HSPG2|FLT4|PDCD6|MIR21|FGFR1|TGFBR1|MDK|MIR101-1|RPTOR|SIRT1|PPP1R16B|MIR27A|MIR27B|MIR146A|MIR135B|PROK1|CCL11|SP1|IL10|MIR499A|CCL24|ADAM17|CCL26|WNT5A|CAV2|HMOX1|ZNF580|POLD4|AP…	110	GOBP_POSITIVE_REGULATION_OF_ENDOTHELIAL_CELL_PROLIFERATION	1.8096	0.0008	GOBP_POSITIVE_REGULATION_OF_ENDOTHELIAL_CELL_PROLIFERATION	POSITIVE REGULATION OF ENDOTHELIAL CELL PROLIFERATION	Regulation of Epithelial and Endothelial Proliferation
17	Regulation of Epithelial and Endothelial Proliferation	4	4	4	0.4583	0.0008	CDH13|STAT3|VASH2|VEGFB|VEGFC|DLX5|DLX6|CDH3|ERBB4|SEMA5A|ECM1|WNT2|WNT3A|WDR48|ANG|EGFL7|WNT7A|HAS2|EGR3|HIF1A|HTR2B|YAP1|IRS2|EMC10|ZNF304|ITGA4|AGTR1|CCND1|CLDN1|EPGN|JUN|ERBB2|HMGA2|LRG1|MIR130A|EYA1|FGFBP1|FGFR2|NRP2|CYP7B1|FLT4|TACR1|FOXP2|RREB1|FGFR1|TGFB1|FZD7|TGFBR1|MDK|JAML|SIRT1|SMO|XBP1|GRN|MIR27A|MIR27B|SOX9|TBX1|MIR146A|MIR135B|CCL11|MIR499A|CCL24|ADAM17|CCL26|WNT5A|RUNX2|CDC42|SCAN…	221	GOBP_POSITIVE_REGULATION_OF_EPITHELIAL_CELL_PROLIFERATION	1.9071	0	GOBP_POSITIVE_REGULATION_OF_EPITHELIAL_CELL_PROLIFERATION	POSITIVE REGULATION OF EPITHELIAL CELL PROLIFERATION	Regulation of Epithelial and Endothelial Proliferation
17	Regulation of Epithelial and Endothelial Proliferation	4	4	4	0.355	0.0026	CDH13|DEAF1|STAT3|DLL4|DLX5|DLX6|ENG|CDH3|EPPK1|ERBB4|SEMA5A|PYGO2|VDR|ECM1|EFNB2|SFRP1|IL26|GPC3|WDR48|EGFL7|HAS2|EGR3|HIF1A|HTR2B|ZEB1|IRS2|EMC10|ISL1|ITGA4|SIX4|CCND1|CLDN1|EPGN|ERRFI1|JUN|SMAD3|LAMA5|ERBB2|HMGA2|LRG1|EREG|MARVELD3|MCC|ZFP36|MIR130A|ZFP36L1|EYA1|MIR15B|MIR16-1|PPARD|MIR222|PPARG|FGF16|FGF18|FUT2|FGFBP1|FGFR2|NRP2|OVOL2|FLT1|FLT4|TACR1|TACSTD2|FOXP2|FRS2|APOE|FUT1|RREB1|TGFB1|F…	423	GOBP_REGULATION_OF_EPITHELIAL_CELL_PROLIFERATION	1.6146	0.0001	GOBP_REGULATION_OF_EPITHELIAL_CELL_PROLIFERATION	REGULATION OF EPITHELIAL CELL PROLIFERATION	Regulation of Epithelial and Endothelial Proliferation
15	Regulation of mRNA Metabolism and Turnover	2.36653	2.36653	2.36653	0.6781	0.0447	CPEB3|DHX36|DND1|HNRNPD|KHSRP|MOV10|PLEKHN1|PUM1|PUM2|RBM24|RC3H1|TARDBP|TRIM71|UPF1|ZC3H12A|ZC3H12D|ZFP36|ZFP36L1|ZFP36L2	19	GOBP_3_UTR_MEDIATED_MRNA_DESTABILIZATION	1.8415	0.0043	GOBP_3_UTR_MEDIATED_MRNA_DESTABILIZATION	3 UTR MEDIATED MRNA DESTABILIZATION	Regulation of mRNA Metabolism and Turnover
15	Regulation of mRNA Metabolism and Turnover	2.50864	2.50864	2.50864	0.4842	0.0361	DCPS|EIF4ENIF1|LSM1|PAN3|PATL1|PATL2|CAPRIN1|CSDE1|CNOT3|PABPC1|CPEB3|DIS3|TOB1|DHX36|MLH1|HNRNPD|PDE12|CNOT7|RC3H1|NT5C3B|PABPN1L|PAN2|ZFP36|DHX9|ZFP36L1|ZFP36L2|HNRNPU|CNOT9|SYNCRIP|TNKS1BP1|TENT4A|YBX1|TENT4B|CNOT10|CNOT4|CNOT11|RC3H2|BTG2|CNOT6|CNOT6L|DCP2|CNOT8|CNOT1|CNOT2|NOCT|PARN|PNLDC1|SAMD4A|SAMD4B|TNRC6A|POLR2G|PAIP1|IGF2BP1|TNRC6B|TNRC6C|AGO2|DCP1A|DCP1B	58	GOBP_NUCLEAR_TRANSCRIBED_MRNA_CATABOLIC_PROCESS_DEADENYLATION_DEPENDENT_DECAY	1.7329	0.0031	GOBP_NUCLEAR_TRANSCRIBED_MRNA_CATABOLIC_PROCESS_DEADENYLATION_DEPENDENT_DECAY	NUCLEAR TRANSCRIBED MRNA CATABOLIC PROCESS DEADENYLATION DEPENDENT DECAY	Regulation of mRNA Metabolism and Turnover
15	Regulation of mRNA Metabolism and Turnover	3.69897	3.69897	3.69897	0.4528	0.0067	ROCK2|MIR340|MIR519A1|MIR203A|MIRLET7C|MIR501|MIR665|CPEB3|DHX36|DND1|FTO|HNRNPD|KHSRP|PIWIL1|MOV10|PIWIL2|PLEKHN1|PUM1|PNPT1|PUM2|RBM24|RC3H1|TARDBP|TRIM71|UPF1|ZC3H12A|ZC3H12D|ZFP36|MIR130A|ZFP36L1|ALKBH5|ZFP36L2|MIR19B1|MEX3D|ELAVL1|NANOS1|METTL16|PRR5L|QKI|TENT4A|TENT4B|BTG2|MIR151A|MIR181A2|MIR181D|MIR27A|MIR27B|MIR140|MIR302C|MIR146A|MIR135B|MIR18A|MIR19A|MIR200B|MIR491|MIR200C|MIR210|MIR54…	202	GOBP_POSITIVE_REGULATION_OF_MRNA_CATABOLIC_PROCESS	1.7811	0.0002	GOBP_POSITIVE_REGULATION_OF_MRNA_CATABOLIC_PROCESS	POSITIVE REGULATION OF MRNA CATABOLIC PROCESS	Regulation of mRNA Metabolism and Turnover
15	Regulation of mRNA Metabolism and Turnover	2.69897	2.69897	2.69897	0.2654	0.0287	MIR103B2|MIR105-2|MIR1178|MIR1180|STAT3|MIR1181|MIR1183|MIR1185-1|MIR1185-2|MIR1197|MIR1207|MIR1208|MIR122|MIR1225|MIR1226|MIR1227|MIR1237|MIR124-1|MIR124-2|MIR124-3|MIR1249|MIR1251|MIR1253|MIR1255B1|MIR125B2|MIR1265|DGCR8|MIR1275|MIR1277|MIR1283-1|MIR1283-2|MIR1287|MIR129-2|ITGA2|MIR1296|MIR1302-2|MIR1302-4|MIR1302-5|CPEB3|MIR1306|DHX36|MIR1307|DND1|MIR133A1HG|HNRNPD|MIR133A2|KHSRP|MIR135A2|MIR1…	1101	GOBP_POST_TRANSCRIPTIONAL_REGULATION_OF_GENE_EXPRESSION	1.3103	0.002	GOBP_POST_TRANSCRIPTIONAL_REGULATION_OF_GENE_EXPRESSION	POST TRANSCRIPTIONAL REGULATION OF GENE EXPRESSION	Regulation of mRNA Metabolism and Turnover
15	Regulation of mRNA Metabolism and Turnover	2.72125	2.72125	2.72125	0.352	0.0282	ROCK2|MIR340|MIR519A1|NRDE2|MIR203A|MIRLET7C|MIR501|MIR665|IKBKE|CPEB3|DHX36|DND1|FTO|HNRNPD|KHSRP|PIWIL1|TENT5B|MOV10|PIWIL2|PLEKHN1|PUM1|PNPT1|PUM2|RBM24|RC3H1|TARDBP|TRIM71|TENT5C|UPF1|ZC3H12A|ZC3H12D|ZFP36|MIR130A|ZFP36L1|ALKBH5|ZFP36L2|ANGEL2|ARID5A|MIR19B1|BOLL|MEX3D|DAZ1|DAZ2|E2F1|DAZ3|DAZ4|DAZL|ELAVL1|ELAVL4|NANOS1|HNRNPA0|HNRNPC|LARP4B|MAPK14|MAPKAPK2|FBLL1|METTL16|MYD88|NICOL1|PRR5L|QKI…	293	GOBP_REGULATION_OF_MRNA_CATABOLIC_PROCESS	1.5142	0.0019	GOBP_REGULATION_OF_MRNA_CATABOLIC_PROCESS	REGULATION OF MRNA CATABOLIC PROCESS	Regulation of mRNA Metabolism and Turnover
15	Regulation of mRNA Metabolism and Turnover	4	4	4	0.7523	0.0009	CPEB3|TOB1|DHX36|HNRNPD|SYNCRIP|PAIP1|IGF2BP1|CNOT7|TENT4A|YBX1|RC3H1|TENT4B|TNRC6B|TNRC6C|ZFP36|AGO2|DHX9|ZFP36L1|ZFP36L2|HNRNPU|CSDE1|PABPC1|CNOT1	23	GOBP_REGULATION_OF_NUCLEAR_TRANSCRIBED_MRNA_CATABOLIC_PROCESS_DEADENYLATION_DEPENDENT_DECAY	2.1749	0	GOBP_REGULATION_OF_NUCLEAR_TRANSCRIBED_MRNA_CATABOLIC_PROCESS_DEADENYLATION_DEPENDENT_DECAY	REGULATION OF NUCLEAR TRANSCRIBED MRNA CATABOLIC PROCESS DEADENYLATION DEPENDENT DECAY	Regulation of mRNA Metabolism and Turnover
22	Regulation of Ossification and Osteoblast Development	2.40894	2.40894	2.40894	0.5771	0.0423	DKK1|STATH|ACVR1B|GDF10|ACVR2B|GFRA4|SRGN|ENPP1|BCL2|ECM1|BMP3|SFRP1|CALCR|TGFB1|PTH|GATA1|HIF1A|PTK2B|SOST|MDK|MIR208A|TMEM53|RBPJ|SMAD3|BCOR|CHSY1|GREM1|CCR1|MEF2C|RFLNA|LRP4|RFLNB|TRPM4|CCL3|FGF23|SOX9|NOTCH1|SMAD2|SMAD6|SMAD7|KREMEN2|AHSG|LTBP3|KREMEN1	44	GOBP_NEGATIVE_REGULATION_OF_OSSIFICATION	1.7509	0.0039	GOBP_NEGATIVE_REGULATION_OF_OSSIFICATION	NEGATIVE REGULATION OF OSSIFICATION	Regulation of Ossification and Osteoblast Development
22	Regulation of Ossification and Osteoblast Development	2.72125	2.72125	2.72125	0.3035	0.0282	TMT1A|TNC|DKK1|LIMD1|DDR2|TNFRSF11A|DLX5|TNFSF11|MIR203A|MIR346|S1PR1|COL6A1|TUFT1|SORT1|CEBPD|FBN2|SRGN|VDR|ECM1|SFRP1|DNAJC13|GPC3|WNT7B|HIF1A|SOST|WWOX|WWTR1|EIF2AK3|ILK|CSF1|DHX36|SMAD3|SMAD4|ERCC2|ID2|RPS15|LRP5|HSD17B4|PPARG|NR1I3|MMP2|MYBBP1A|FGF18|SOX8|FGFR2|FHL2|HNRNPC|MAPK14|PTPN11|TAC1|TACR1|TGFB1|GATA1|IGSF10|MDK|SIRT7|SEMA4D|PBX1|GLI2|WNT11|SEMA7A|SLC20A2|GREM1|SMO|SNAI1|SNAI2|SOX9|A…	456	GOBP_OSSIFICATION	1.4149	0.0019	GOBP_OSSIFICATION	OSSIFICATION	Regulation of Ossification and Osteoblast Development
22	Regulation of Ossification and Osteoblast Development	2.69897	2.69897	2.69897	0.3456	0.0286	RRBP1|TMT1A|TNC|FBL|LIMD1|DDR2|VEGFC|DLX5|MIR203A|TP53INP2|MIR346|COL6A1|CEBPD|FBN2|BMP3|SFRP1|DNAJC13|WNT3|WNT3A|WNT7B|WWOX|WWTR1|YAP1|ILK|SMAD3|SMAD4|ATRAID|ID2|FGF23|IBSP|RPS15|LRP5|NBR1|NELL1|HSD17B4|PPARG|NR1I3|CLEC5A|MYBBP1A|SOX8|FGFR2|CLIC1|FHL2|HNRNPC|MAPK14|FBXO5|HIRA|ALYREF|LGR4|IARS1|H3-3A|H3-3B|IFT80|LTF|SIRT7|SEMA4D|MAP2K6|GLI2|WNT11|SEMA7A|GREM1|SMO|SNAI1|MEF2C|SNAI2|MIR27A|SOX9|MIR…	267	GOBP_OSTEOBLAST_DIFFERENTIATION	1.486	0.002	GOBP_OSTEOBLAST_DIFFERENTIATION	OSTEOBLAST DIFFERENTIATION	Regulation of Ossification and Osteoblast Development
22	Regulation of Ossification and Osteoblast Development	2.52288	2.52288	2.52288	0.427	0.0359	COMP|BMP2|DKK1|ACTN3|DDR2|GPM6B|S1PR1|KL|FBN2|SRGN|VDR|ECM1|BMP3|SFRP1|HIF1A|SOST|ISG15|CSF1|ADGRV1|SMAD3|ATP2B1|ATRAID|BMP2K|CCR1|LRP4|FGF23|NBR1|NELL1|NOTUM|RXRA|RXRB|SUV39H1|TXLNG|MAPK14|OSR1|DHRS3|ADGRG6|PTPN11|TAC1|TACR1|ENPP1|BCL2|CALCR|TGFB1|LTF|GATA1|MDK|PBX1|MAPK1|IFITM5|SLC20A2|INTU|GREM1|MEF2C|PHOSPHO1|SOX9|ADCY10|TWIST1|WNT5A|RUNX2|LTBP3|MATN1|FAM20C|CCDC134|ACVR1|ALOX5|BMPR1A|ACVR1B|…	127	GOBP_REGULATION_OF_OSSIFICATION	1.6199	0.003	GOBP_REGULATION_OF_OSSIFICATION	REGULATION OF OSSIFICATION	Regulation of Ossification and Osteoblast Development
48	Regulation of Small GTPase–Mediated Signal Transduction	2.72125	2.72125	2.72125	0.4843	0.0281	SPRY3|RIPOR2|RASAL1|CGNL1|SPRY4|RIPOR1|RASAL3|STAMBP|SH3BP1|SCAI|SYNGAP1|ITGA3|MAPKAP1|PPP2CB|SLIT2|KANK1|ARHGAP29|CUL3|ARHGAP22|ARHGAP30|ARHGAP24|ARHGAP45|ARHGAP12|GMIP|ARHGAP17|LZTR1|ARHGAP25|KCTD13|FLCN|RASA2|CYRIB|ARHGAP35|ARHGAP42|ARHGAP44|CCDC125|EPHB2|NF1|DLC1|SPRY1|MIR29B1|SPRY2|STMN1|DAB2IP|MIR223|HEG1|MET|MFN2|RABGEF1|WNK1|FBP1|BCL6|MIR21|TGFB2|ITGB1|NUP62|STMN3|TNFAIP1|TRIM67|RASA4|MYO…	67	GOBP_NEGATIVE_REGULATION_OF_SMALL_GTPASE_MEDIATED_SIGNAL_TRANSDUCTION	1.7311	0.0019	GOBP_NEGATIVE_REGULATION_OF_SMALL_GTPASE_MEDIATED_SIGNAL_TRANSDUCTION	NEGATIVE REGULATION OF SMALL GTPASE MEDIATED SIGNAL TRANSDUCTION	Regulation of Small GTPase–Mediated Signal Transduction
48	Regulation of Small GTPase–Mediated Signal Transduction	2.56864	2.56864	2.56864	0.2692	0.0332	CDH13|RND1|SPRY3|RND2|RND3|ROCK2|DOCK1|RTKN|DOCK5|GRAP|GRAP2|SDCBP|STAMBP|SH3BP1|SYNGAP1|ITGA3|SIPA1L1|CCNA2|CSF1|SLIT2|KITLG|ERBB2|MAP4K4|MAPRE2|ARHGAP1|SRC|ARHGAP8|SRGAP2|DENND1A|STARD13|STARD8|RAB12|STMN1|SWAP70|SYDE1|RAP1BL|RASGRF2|SYNPO2L|ARHGAP27|SH2D3A|APOC3|SH2D3C|APOE|TGFB2|HACE1|MAP2K1|SEMA4D|ARHGAP21|RAB15|TNFAIP1|DOCK4|VANGL2|PLEKHG3|RAB21|WASF1|DAB1|RAP2C|RASGEF1A|ARL3|CCL19|RIPOR1|R…	502	GOBP_SMALL_GTPASE_MEDIATED_SIGNAL_TRANSDUCTION	1.3116	0.0027	GOBP_SMALL_GTPASE_MEDIATED_SIGNAL_TRANSDUCTION	SMALL GTPASE MEDIATED SIGNAL TRANSDUCTION	Regulation of Small GTPase–Mediated Signal Transduction
45	Response to Type i interferon	2.63827	-2.63827	2.63827	-0.5875	0.0303	PTPN6|STING1|STAT2|USP27X|PTPN11|TBK1|TTLL12|RBM47|MMP12|UBE2K|GIGYF2|CDC37|MIR21|USP29|ZBP1|YTHDF2|LSM14A|MUL1|ADAR|EIF4E2|NLRC5|PTPN1|ISG15|OAS1|OAS3|IKBKE|RNF185|MAVS|SAMHD1|TRIM41|CNOT7|IRF3|IRF7|TRIM6|TREX1|DCST1|USP18|WNT5A|YTHDF3|TRIM56|SMIM30|FADD|CACTIN|METTL3|PTPN2	45	GOBP_REGULATION_OF_TYPE_I_INTERFERON_MEDIATED_SIGNALING_PATHWAY	-1.7674	0.0023	GOBP_REGULATION_OF_TYPE_I_INTERFERON_MEDIATED_SIGNALING_PATHWAY	REGULATION OF TYPE I INTERFERON MEDIATED SIGNALING PATHWAY	Response to Type i interferon
45	Response to Type i interferon	2.92082	-2.92082	2.92082	-0.5127	0.0207	IFITM1|IFITM2|STING1|IFITM3|USP27X|AZI2|IFNAR1|IFNAR2|JAK1|TBK1|TTLL12|UBE2K|GIGYF2|IFIH1|CDC37|USP29|YTHDF2|MUL1|ADAR|SMPD1|ISG15|SETD2|OAS1|OAS3|OASL|IFIT1|IKBKE|RNF185|MX1|IRAK1|SAMHD1|TRAF3|OAS2|CNOT7|IRF3|IRF7|TRIM6|SHFL|TREX1|SP100|DCST1|USP18|CH25H|CR2|SMIM30|TRIM65|METTL3|PTPN2|PTPN6|STAT1|STAT2|MYD88|PTPN11|RBM47|TANK|TBKBP1|MMP12|MIR21|ZBP1|HDAC4|LSM14A|SHMT2|EIF4E2|NLRC5|PTPN1|IFNA1|IF…	92	GOBP_RESPONSE_TO_TYPE_I_INTERFERON	-1.731	0.0012	GOBP_RESPONSE_TO_TYPE_I_INTERFERON	RESPONSE TO TYPE I INTERFERON	Response to Type i interferon
14	Ribonucleoprotein and Ribosomal Subunit Assembly	2.42022	-2.42022	2.42022	-0.526	0.0417	UTP4|UTP6|WDR3|WDR46|RPS19|LSM6|DCAF13|ABT1|ERCC2|SNU13|GTF2H5|DHX37|UTP25|TRMT112|BYSL|RPS14|RPS16|RPS21|FCF1|NOP14|RIOK3|RPS28|NOP9|RCL1|TBL3|RPS8|UTP20|UTP23|WDR43|KRI1|RPP40|BMS1|TSR1|UTP3|RIOK2|DDX52|HEATR1|IMP3|IMP4|MPHOSPH10|RRS1|NGDN|NOB1|NOL10|NAT10|NOL11|NOL7|PWP2|RIOK1|RRP36|SLX9|SRFBP1|TSR2|TSR3	54	GOBP_MATURATION_OF_SSU_RRNA	-1.7334	0.0038	GOBP_MATURATION_OF_SSU_RRNA	MATURATION OF SSU RRNA	Ribonucleoprotein and Ribosomal Subunit Assembly
14	Ribonucleoprotein and Ribosomal Subunit Assembly	2.61979	-2.61979	2.61979	-0.6238	0.0307	UTP4|UTP6|WDR46|RPS16|RPS19|RPS21|FCF1|NOP14|NOP9|RCL1|TBL3|RPS8|UTP20|UTP23|WDR43|KRI1|RPP40|BMS1|DCAF13|TSR1|ABT1|UTP3|ERCC2|HEATR1|GTF2H5|DHX37|RRS1|UTP25|NGDN|NOL10|BYSL|PWP2|RRP36|SLX9|TSR2	35	GOBP_MATURATION_OF_SSU_RRNA_FROM_TRICISTRONIC_RRNA_TRANSCRIPT_SSU_RRNA_5_8S_RRNA_LSU_RRNA	-1.8579	0.0024	GOBP_MATURATION_OF_SSU_RRNA_FROM_TRICISTRONIC_RRNA_TRANSCRIPT_SSU_RRNA_5_8S_RRNA_LSU_RRNA	MATURATION OF SSU RRNA FROM TRICISTRONIC RRNA TRANSCRIPT SSU RRNA 5 8S RRNA LSU RRNA	Ribonucleoprotein and Ribosomal Subunit Assembly
14	Ribonucleoprotein and Ribosomal Subunit Assembly	4	-4	4	-0.4345	0	AIRIM|TFB2M|C1ORF131|DICER1|DDX27|DDX31|DDX51|DNTTIP2|SMN1|DHX29|EBNA1BP2|SMN2|ESF1|EIF2S2|GNL2|EIF2S3|GTF3A|EIF2S3B|GTPBP10|EIF3A|ISG20L2|EIF3B|KRR1|EIF3C|NOC4L|EIF3CL|NOP16|EIF3E|NOP56|EIF3F|NOP58|EIF3G|PDCD11|EIF3H|PIN4|EIF3I|PNO1|EIF3J|POP4|RPS12|EIF3K|POP5|EIF3L|POP7|EIF3M|RBFA|ABCF1|RBIS|REXO1|EIF4B|HSP90AB1|REXO1L1P|EIF4H|REXO5|EIF5|RPP25|RPP30|MCTS2|RPP38|RPS19BP1|RPL11|RRP1|RRP9|RPL14|RS…	494	GOBP_RIBONUCLEOPROTEIN_COMPLEX_BIOGENESIS	-1.8483	0	GOBP_RIBONUCLEOPROTEIN_COMPLEX_BIOGENESIS	RIBONUCLEOPROTEIN COMPLEX BIOGENESIS	Ribonucleoprotein and Ribosomal Subunit Assembly
14	Ribonucleoprotein and Ribosomal Subunit Assembly	4	-4	4	-0.5444	0.0002	UTP4|C1ORF131|UTP6|FBL|WDR3|WDR46|DNTTIP2|KRR1|ERAL1|METTL17|NOP56|RPS19|NOP58|MRPS7|PNO1|RPS12|RCC1L|LSM6|RRP7BP|DCAF13|RPS19BP1|RRP9|SURF6|ABT1|UTP18|EXOSC10|ERCC2|RPSA|RPS15|GTF2H5|DHX37|UTP25|EMG1|RPS11|RPS13|RPS14|RPS16|RPS17|RPS21|RPS23|XRCC5|RPS24|RPS25|RPS27|RPS27A|RPS28|RPS4X|AATF|NOL6|RPS5|RPS8|RPS9|NPM1|RPS6|NOM1|UTP3|RIOK2|RRS1|RPSA2|LTV1|UTP15|WDR75|UTP11|RPS7|RRP7A|DIMT1|FAU|RPS15A|…	108	GOBP_RIBOSOMAL_SMALL_SUBUNIT_BIOGENESIS	-1.9875	0	GOBP_RIBOSOMAL_SMALL_SUBUNIT_BIOGENESIS	RIBOSOMAL SMALL SUBUNIT BIOGENESIS	Ribonucleoprotein and Ribosomal Subunit Assembly
14	Ribonucleoprotein and Ribosomal Subunit Assembly	4	-4	4	-0.4795	0	AIRIM|TFB2M|UTP4|C1ORF131|UTP6|DDX27|FBL|WDR3|DDX31|WDR46|DDX51|DNTTIP2|DHX29|EBNA1BP2|ESF1|BRIX1|GNL2|C1D|GTF3A|DDX28|GTPBP10|EIF1AX|ISG20L2|EIF5B|KRR1|WDR74|ERAL1|NOC4L|NOP16|METTL17|NOP56|MIURF|NOP58|MPV17L2|PDCD11|MRPS2|PIN4|MRPS7|PNO1|MTERF3|POP4|RPS12|MTG1|POP5|MTG2|POP7|NIP7|RBFA|ABCF1|RBIS|RCC1L|REXO1|RRP7BP|REXO1L1P|REXO5|EIF5|RPP25|RPP30|RPP38|RPS19BP1|RPL11|RRP1|RRP9|RPL14|RSL24D1|SURF…	320	GOBP_RIBOSOME_BIOGENESIS	-1.9663	0	GOBP_RIBOSOME_BIOGENESIS	RIBOSOME BIOGENESIS	Ribonucleoprotein and Ribosomal Subunit Assembly
14	Ribonucleoprotein and Ribosomal Subunit Assembly	4	-4	4	-0.4198	0.0022	TFB2M|UTP4|UTP6|DDX27|FBL|SLFN12|WDR3|WDR46|DDX51|EBNA1BP2|ESF1|BRIX1|C1D|GTF3A|KRR1|WDR74|NOC4L|NOP56|NOP58|PDCD11|PIN4|POP4|POP5|POP7|ANG|RBFA|REXO1|RRP7BP|REXO1L1P|REXO5|CAVIN1|RPP25|RPP30|RPP38|RPL11|RRP1|RRP9|RPL14|PES1|UTP14A|UTP18|WDR55|YBEY|EXOSC10|ERCC2|RPL27|RPS15|TOP1|UTP25|RPL35|RPL35A|SBDS|SUV39H1|RPL5|RPL7|RPL7A|DDX10|EMG1|FBLL1|METTL16|RPS14|RPS16|RPS17|TENT4B|RPS21|RPS24|RPS25|PEL…	266	GOBP_RRNA_METABOLIC_PROCESS	-1.6895	0	GOBP_RRNA_METABOLIC_PROCESS	RRNA METABOLIC PROCESS	Ribonucleoprotein and Ribosomal Subunit Assembly
14	Ribonucleoprotein and Ribosomal Subunit Assembly	4	-4	4	-0.4596	0.0004	TFB2M|UTP4|UTP6|DDX27|FBL|WDR3|WDR46|DDX51|EBNA1BP2|ESF1|BRIX1|C1D|KRR1|WDR74|NOC4L|NOP56|NOP58|PDCD11|PIN4|POP4|POP5|POP7|RBFA|REXO1|RRP7BP|REXO1L1P|REXO5|RPP25|RPP30|RPP38|RPL11|RRP1|RRP9|RPL14|PES1|UTP14A|UTP18|WDR55|YBEY|EXOSC10|ERCC2|RPL27|RPS15|UTP25|RPL35|RPL35A|SBDS|SUV39H1|RPL5|RPL7|RPL7A|DDX10|EMG1|FBLL1|METTL16|RPS14|RPS16|RPS17|TENT4B|RPS21|RPS24|RPS25|RPS27|RPS28|NOL6|RPS8|SIRT7|DDX4…	222	GOBP_RRNA_PROCESSING	-1.8312	0	GOBP_RRNA_PROCESSING	RRNA PROCESSING	Ribonucleoprotein and Ribosomal Subunit Assembly
28	Sensory System & Eye Morphogenesis	2.88606	2.88606	2.88606	0.7114	0.0224	FZD5|PAX6|PAX2|PROX1|TBX2|TFAP2A|CITED2|FRS2|IFT172|WNT16|HIPK2|ZEB1|CRYAA|STRA6|KDM2B|TH|FOXF2|ALDH1A3|SOX11|HIPK1|SP3|TWIST1|PHACTR4|WNT5A|IHH|BMP7|SIX3	27	GOBP_EMBRYONIC_CAMERA_TYPE_EYE_MORPHOGENESIS	1.9024	0.0013	GOBP_EMBRYONIC_CAMERA_TYPE_EYE_MORPHOGENESIS	EMBRYONIC CAMERA TYPE EYE MORPHOGENESIS	Sensory System & Eye Morphogenesis
28	Sensory System & Eye Morphogenesis	3.69897	3.69897	3.69897	0.3002	0.0071	CRB2|LGR5|STAT3|TPRN|DLL4|SMG9|DLX5|TRIP11|DLX6|TSHZ1|DSCAM|TTC39C|TULP1|SDC4|CEBPD|C1QTNF5|FBN2|USH1G|LRP10|PYGO2|VAX2|MYCL|PI4KB|EPHA4|USH2A|GBX2|SLC26A5|VSX2|WDR19|WNT10A|WNT7B|SLC39A5|WNT9A|HIF1A|SLC4A5|YY1|SHROOM2|ZEB1|LIN7A|ZHX2|CCNA2|SIX4|EPHB1|JUN|SMAD3|RCN1|WNT5B|ESRRB|LRP5|EYA1|PLAAT3|POU4F2|CRYBA1|SRF|FASLG|FAT3|SH3PXD2B|SLC25A25|SOX8|STAU2|FGFR2|FJX1|MAPKAPK2|FLT1|PTPN11|FOXP2|FRS2|FZ…	638	GOBP_SENSORY_ORGAN_DEVELOPMENT	1.4623	0.0002	GOBP_SENSORY_ORGAN_DEVELOPMENT	SENSORY ORGAN DEVELOPMENT	Sensory System & Eye Morphogenesis
28	Sensory System & Eye Morphogenesis	3.22185	3.22185	3.22185	0.3219	0.0142	CRB2|STAT3|DLL4|SMG9|DSCAM|TULP1|FBN2|PYGO2|VAX2|VSX2|WDR19|WNT7B|SLC39A5|WNT9A|HIF1A|SLC4A5|YY1|SHROOM2|ZEB1|ISL1|ZHX2|EPHB1|JUN|SMAD3|RCN1|WNT5B|LRP5|PLAAT3|POU4F2|CRYBA1|SRF|FASLG|FAT3|SH3PXD2B|SLC25A25|SOX8|STAU2|FJX1|FLT1|FOXP2|FRS2|FZD4|SEMA3A|TGFB1|TGFB2|CDKN1C|TGFBR1|GDF3|PBX1|TMOD1|CRYBA2|STRA6|CRYBA4|CRYBB1|CRYBB2|WT1|CRYBB3|CRYBG3|CRYGA|CRYGC|GRHL2|CRYGN|GRN|LENEP|NHS|AGTPBP1|BLOC1S3|S…	439	GOBP_SENSORY_SYSTEM_DEVELOPMENT	1.4777	0.0006	GOBP_SENSORY_SYSTEM_DEVELOPMENT	SENSORY SYSTEM DEVELOPMENT	Sensory System & Eye Morphogenesis
19	Smooth Muscle and Epithelial Migration	3.52288	3.52288	3.52288	0.3513	0.0096	CD63|CENPV|CRB2|CYGB|DDR2|CDH2|DOCK1|DOCK5|EDN3|EFNB1|ENG|ENPP2|EPPK1|ERBB4|SDC4|FAM114A1|FAT2|FBN2|SEMA5A|FERMT1|FGF19|FOLR1|IFNG|FUT8|AMOT|GBX2|AMOTL1|GLIPR2|AMOTL2|GPC3|PTPN23|HAS1|HAS2|HBEGF|ANLN|HIF1A|HTR2B|HYAL2|ILK|IRS2|AQP1|ISL1|ARID5B|ITGA2|ITGA3|ITGA4|ITGB4|ITGB7|JUN|SMAD3|ARF6|KITLG|SMAD4|KRT16|KRT2|LAMA5|LAMTOR2|LRG1|LTB4R2|MACF1|MACIR|MAP4K4|MAPRE2|LRP5|MARVELD3|MCC|MEGF8|MESP1|MIR13…	257	GOBP_AMEBOIDAL_TYPE_CELL_MIGRATION	1.5356	0.0003	GOBP_AMEBOIDAL_TYPE_CELL_MIGRATION	AMEBOIDAL TYPE CELL MIGRATION	Smooth Muscle and Epithelial Migration
19	Smooth Muscle and Epithelial Migration	2.4437	2.4437	2.4437	0.522	0.0404	DOCK1|DOCK5|EPB41L5|ENPP2|BMPR2|CLASP1|CLASP2|HDAC6|IFNG|GLIPR2|HAS2|HBEGF|HIF1A|IQSEC1|IRS2|ITGA2|ITGA3|JUN|ARF6|CTSH|PLCG1|PFN1|PLCG2|MAP4K4|MAPRE2|TGFBR2|SRC|MIR221|MIR222|MMP9|PTK2|TAC1|TACR1|RAB11A|RAB25|PPM1F|EPB41L4B|INSL3|RREB1|PRKCE|TGFB2|MTOR|RTN4|FGF10|SOX9|FGF7|VIL1|ADAM9|ARHGAP5|CAPN7	50	GOBP_POSITIVE_REGULATION_OF_EPITHELIAL_CELL_MIGRATION	1.7583	0.0036	GOBP_POSITIVE_REGULATION_OF_EPITHELIAL_CELL_MIGRATION	POSITIVE REGULATION OF EPITHELIAL CELL MIGRATION	Smooth Muscle and Epithelial Migration
19	Smooth Muscle and Epithelial Migration	4	4	4	0.3494	0.0001	CDH13|SPN|STAT3|DDR2|ROCK2|DOCK1|DOCK5|RUFY3|EDN3|S1PR1|DSCAM|ENPP2|CDH5|SDCBP|SELE|SEMA5A|FERMT1|ARHGEF39|EPHA4|NUMB|SLC26A5|GLIPR2|EDN2|HAS2|HBEGF|C1QTNF8|HIF1A|LRRC15|CAVIN1|IRS2|CCDC25|EMC10|ITGA2|ITGA3|ITGA4|CSF1|CLDN1|SLIT2|JUN|SMAD3|EZH2|KITLG|F7|SMIM22|WNT5B|MAP4K4|MAPRE2|ETS1|ZC3H12A|MEGF8|CEACAM6|SRC|CPNE3|MIR221|DAPK2|MIR222|SSH1|MMP2|FGF16|MMP9|FGF18|MSTN|FGFBP1|FUT4|NRP2|SPI1|DUOX1|M…	645	GOBP_POSITIVE_REGULATION_OF_LOCOMOTION	1.709	0	GOBP_POSITIVE_REGULATION_OF_LOCOMOTION	POSITIVE REGULATION OF LOCOMOTION	Smooth Muscle and Epithelial Migration
19	Smooth Muscle and Epithelial Migration	4	4	4	0.5225	0.0053	CD63|IL4|DOCK1|DOCK5|EPB41L5|ADIPOR1|ENPP2|BMPR2|CLASP1|EPPK1|CLASP2|HDAC6|IFNG|GLIPR2|PTPN23|CORO1C|HAS2|HBEGF|HIF1A|IQSEC1|IRS2|ITGA2|ITGA3|JUN|ARF6|CTSH|MACF1|PLCG1|DUSP10|MACIR|PFN1|PLCG2|MAP4K4|PFN2|MAPRE2|MARVELD3|MCC|TGFBR2|PTEN|MIR130A|SRC|MIR221|MIR222|MMP9|PTK2|DAB2IP|TAC1|PTPRG|TACR1|PTPRR|TACSTD2|RAB11A|RAB25|PPM1F|EPB41L4B|INSL3|RREB1|SASH1|PRKCE|TGFB2|EVL|MIR379|MTOR|RTN4|FGF10|SOX9…	72	GOBP_REGULATION_OF_EPITHELIAL_CELL_MIGRATION	1.9021	0.0001	GOBP_REGULATION_OF_EPITHELIAL_CELL_MIGRATION	REGULATION OF EPITHELIAL CELL MIGRATION	Smooth Muscle and Epithelial Migration
19	Smooth Muscle and Epithelial Migration	3.30103	3.30103	3.30103	0.4579	0.0116	CD63|FGF8|DOCK1|DOCK5|ENPP2|EPPK1|PROX1|FAT2|HDAC6|FERMT1|IFNG|GLIPR2|PTPN23|HAS2|HBEGF|ANLN|HIF1A|IQSEC1|IRS2|ITGA2|ITGA3|JUN|ARF6|KANK1|KITLG|SMAD4|KANK2|KRT16|KRT2|LRG1|LTB4R2|MACF1|MACIR|MAP4K4|KIT|MAPRE2|MARVELD3|MCC|MIR130A|SRC|MIR221|PPARD|MIR222|MMP9|NANOS1|OCLN|PKN2|PKN3|PTPN11|TAC1|PTPRG|TACR1|FOXF1|PTPRR|TACSTD2|RAB11A|RAB25|RREB1|TESK1|SASH1|TGFB2|MIR379|MTOR|GRHL2|SNAI1|SNAI2|ACTA2|A…	110	GOBP_TISSUE_MIGRATION	1.7754	0.0005	GOBP_TISSUE_MIGRATION	TISSUE MIGRATION	Smooth Muscle and Epithelial Migration
27	Smooth Muscle and Epithelial Migration	3.1549	3.1549	3.1549	0.4856	0.0151	MIR503|DDR2|IGF1|DOCK5|DDR1|MIR665|VTN|MIRLET7B|HAS2|TLR4|ANXA1|ITGB1BP1|ITGA2|ITGB3|SIX4|SLIT2|MIR15A|MIR221|PPARD|ABHD2|SSH1|MYOCD|MSTN|LPAR1|MIR223|LRP1|MDM2|TACR1|FOXO4|NET1|MIR143|BCL2|MIR20A|MIR21|MIR214|BIN3|PLEKHO1|MDK|AIF1|PLXNA1|MAP3K7|PLAU|IGFBP5|SEMA6D|POSTN|SMO|XBP1|MEF2C|MEGF10|AKIRIN1|MIR218-1|MIR140|MIR302C|MIR146A|MIR135B|DOCK4|MIR499A|PLAT|MIR34A|S100A11|PDGFD|BMPR1A|ADIPOQ|NRP1…	110	GOBP_MUSCLE_CELL_MIGRATION	1.7677	0.0007	GOBP_MUSCLE_CELL_MIGRATION	MUSCLE CELL MIGRATION	Smooth Muscle and Epithelial Migration
27	Smooth Muscle and Epithelial Migration	4	4	4	0.707	0.0028	LPAR1|DDR2|IGF1|DOCK5|MDM2|NRP1|VTN|CCN4|FOXO4|MIR143|BCL2|MIR20A|CCL5|MIR21|ADAMTS1|PAK1|FGF9|HAS2|TLR4|MDK|AIF1|NR4A3|CRK|TERT|MAP3K7|ITGA2|ITGB3|FAT1|DOCK7|IGFBP5|MIR448|PDGFRB|SEMA6D|POSTN|XBP1|MIR302C|MIR146A|MIR135B|MIR26A1|DOCK4|MIR499A|PDGFB|MIR221|S100A11|SSH1|MIR451A|PDGFD	47	GOBP_POSITIVE_REGULATION_OF_SMOOTH_MUSCLE_CELL_MIGRATION	2.0084	0.0001	GOBP_POSITIVE_REGULATION_OF_SMOOTH_MUSCLE_CELL_MIGRATION	POSITIVE REGULATION OF SMOOTH MUSCLE CELL MIGRATION	Smooth Muscle and Epithelial Migration
27	Smooth Muscle and Epithelial Migration	3.30103	3.30103	3.30103	0.5355	0.0118	MIR503|DDR2|IGF1|BMPR1A|DOCK5|ADIPOQ|DDR1|MIR665|NRP1|VTN|MIRLET7B|CCN4|AAMP|NDRG4|CCL5|ADAMTS1|CORO1B|PAK1|FGF9|HAS2|TLR4|SERPINE1|NR4A3|CRK|DDIT3|ITGA2|ITGB3|PDGFA|DOCK7|MIR448|PDGFRB|SLIT2|GRB10|MIR15A|NF1|MIR221|PPARD|NFE2L2|ABHD2|SSH1|MYOCD|LPAR1|MIR223|LRP1|PARVA|MDM2|TACR1|FOXO4|MIR143|BCL2|MIR20A|MIR362|MIR21|MIR182|MIR214|MIR638|GSTP1|MDK|AIF1|PTPN1|PLXNA1|TERT|TRIB1|MAP3K7|MIR1298|PLAU|…	96	GOBP_SMOOTH_MUSCLE_CELL_MIGRATION	1.8601	0.0005	GOBP_SMOOTH_MUSCLE_CELL_MIGRATION	SMOOTH MUSCLE CELL MIGRATION	Smooth Muscle and Epithelial Migration
27	Smooth Muscle and Epithelial Migration	4	4	4	0.7281	0.0029	MIR503|DDR2|DOCK5|ADIPOQ|MIR665|MIRLET7B|ADAMTS1|PAK1|FGF9|NR4A3|DDIT3|DOCK7|MIR448|GRB10|MIR15A|NF1|MIR221|NFE2L2|SSH1|MYOCD|MIR223|MDM2|MIR143|MIR20A|MIR362|MIR21|MIR182|MIR214|MIR638|PTPN1|TERT|MAP3K7|MIR1298|FAT1|MIR137|IGFBP5|PRKG1|XBP1|MEF2C|GNA12|TPM1|MIR218-1|MIR140|MIR302C|MIR146A|MIR135B|MIR26A1|DOCK4|MIR499A|PDGFB|MIR34A|BMP4|MIR424|MIR451A	54	GOBP_VASCULAR_ASSOCIATED_SMOOTH_MUSCLE_CELL_MIGRATION	2.0525	0.0001	GOBP_VASCULAR_ASSOCIATED_SMOOTH_MUSCLE_CELL_MIGRATION	VASCULAR ASSOCIATED SMOOTH MUSCLE CELL MIGRATION	Smooth Muscle and Epithelial Migration
44	Steroid and Endocrine Hormone Biosynthesis	3.52288	3.52288	3.52288	0.5988	0.009	BMP2|EGR1|CLCN2|NR5A2|AANAT|DIO3|CHST9|CYP21A2|RDH8|ASMT|WNT4|DIO1|HIF1A|CYP17A1|STC2|FSHB|HSD17B3|HSD3B1|STARD3|HSD3B2|DIO2|SRD5A2|HSD17B11|BMP5|AKR1B1|AKR1B15|HSD17B2|SRD5A1|HSD17B8|CYP11B1|CYP11B2|HSD17B1|DAB2|TG|HSD17B12|CHST8|CYP11A1|H6PD|CACNA1H|HSD17B7|DUOX1|ARNT|HFE|MED1|LHB|PDE8B|ADM|FDX1|TPO|DUOX2|FFAR3|DKK3|DGKQ|HSD17B6|NR3C1|TSPO|DHRS11|REST|POR|ATP1A1|SCP2|LHCGR|CYP19A1|SRD5A3|BMP6	65	GOBP_HORMONE_BIOSYNTHETIC_PROCESS	1.95	0.0003	GOBP_HORMONE_BIOSYNTHETIC_PROCESS	HORMONE BIOSYNTHETIC PROCESS	Steroid and Endocrine Hormone Biosynthesis
44	Steroid and Endocrine Hormone Biosynthesis	3.30103	3.30103	3.30103	0.643	0.0122	CACNA1H|HSD17B7|BMP2|EGR1|CLCN2|MED1|LHB|NR5A2|ADM|CYP21A2|RDH8|SERPINA6|WNT4|CRH|DKK3|DGKQ|HSD17B6|NR3C1|CYP17A1|FSHB|HSD17B3|HSD3B1|STARD3|HSD3B2|SRD5A2|TSPO|HSD17B11|BMP5|AKR1B1|AKR1B15|HSD17B2|SRD5A1|HSD17B8|CYP11B1|CYP11B2|HSD17B1|DHRS11|REST|ATP1A1|DAB2|SCP2|HSD17B12|CYP11A1|CYP19A1|SRD5A3|BMP6|H6PD	47	GOBP_STEROID_HORMONE_BIOSYNTHETIC_PROCESS	1.9215	0.0005	GOBP_STEROID_HORMONE_BIOSYNTHETIC_PROCESS	STEROID HORMONE BIOSYNTHETIC PROCESS	Steroid and Endocrine Hormone Biosynthesis
38	tRNA and RNA 5 End Processing	2.55284	-2.55284	2.55284	-0.581	0.0345	HSD17B10|PRORP|THG1L|POP4|POP5|NOP14|POP7|NOP9|TBL3|UTP20|RPP25|RPP30|RPP40|RPP38|SNRPB|SNRPD1|SNRPD2|ABT1|SNRPD3|SNRPE|SNRPF|SSB|SNRPG|TGS1|CMTR1|CMTR2|NCBP1|NCBP3|PNPT1|RAMAC|RAMACL|RPP14|RNGTT|RPP25L|RNMT|TRMT10C|POP1|RPP21	38	GOBP_RNA_5_END_PROCESSING	-1.7477	0.0028	GOBP_RNA_5_END_PROCESSING	RNA 5 END PROCESSING	tRNA and RNA 5 End Processing
38	tRNA and RNA 5 End Processing	2.45593	-2.45593	2.45593	-0.6948	0.0393	HSD17B10|PRORP|SSB|RPP14|RPP25L|THG1L|POP4|POP5|TRMT10C|POP7|POP1|RPP21|RPP25|RPP30|RPP40|RPP38	16	GOBP_TRNA_5_END_PROCESSING	-1.7802	0.0035	GOBP_TRNA_5_END_PROCESSING	TRNA 5 END PROCESSING	tRNA and RNA 5 End Processing
16	Vasculature and Artery Development	3.69897	3.69897	3.69897	0.5655	0.007	FGF8|BMPR1A|DLL4|EGR2|JAG1|ROBO1|TAB1|ROBO2|ENG|HES1|ACVRL1|PDE2A|PROX1|MYLK|SNX17|EFNB2|ADAMTS9|EFEMP2|NDST1|FOXH1|SEC24B|SIX1|PDGFRB|MYH10|FAM3D|EDNRA|NGFR|NOTCH1|SMAD6|NKX3-1|PKD2|TGFBR2|MEGF8|EYA1|GAA|SRF|MIR29B1|ADAMTS6|AP2B1|CNTRL|PRDM1|DCTN5|FKBP10|HECTD1|APLNR|LOX|LOXL1|LRP1|NPRL3|PCDHA10|SUFU|TBX2|MIR143|MIR145|TGFB2|PLXND1|RBPJ|COL3A1|MIR205|LRP2|PRICKLE1|TBX1|SOX4|LEP|HEY1|HEY2|CHD7|TF…	69	GOBP_AORTA_DEVELOPMENT	1.9465	0.0002	GOBP_AORTA_DEVELOPMENT	AORTA DEVELOPMENT	Vasculature and Artery Development
16	Vasculature and Artery Development	3.39794	3.39794	3.39794	0.6509	0.01	FKBP10|LRP1|FGF8|NPRL3|BMPR1A|DLL4|JAG1|ENG|HES1|ACVRL1|PROX1|MYLK|TBX2|MIR143|MIR145|EFNB2|TGFB2|ADAMTS9|EFEMP2|FOXH1|SEC24B|SIX1|RBPJ|PDGFRB|COL3A1|MIR205|NOTCH1|TBX1|TGFBR2|SOX4|EYA1|HEY1|HEY2|CHD7|SRF|MIR29B1|TFAP2B|NAGLU	38	GOBP_AORTA_MORPHOGENESIS	1.9451	0.0004	GOBP_AORTA_MORPHOGENESIS	AORTA MORPHOGENESIS	Vasculature and Artery Development
16	Vasculature and Artery Development	3.52288	3.52288	3.52288	0.4894	0.0076	COMP|MIR494|MIR495|FGF8|DLL4|TAB1|ENG|HES1|PROX1|SNX17|FOXC1|EFNB2|FOLR1|COMT|EFEMP2|NDST1|EDNRA|NGFR|NKX3-1|MEGF8|MIR153-1|NOTCH3|EYA1|GAA|SRF|MIR29B1|ADAMTS6|AP2B1|MYOCD|CNTRL|DCTN5|FKBP10|HECTD1|LOX|ADGRF5|LOXL1|LRP1|NPRL3|PCDHA10|ANGPTL3|FOXF1|HOXA13|MIR143|APOE|MIR145|TGFB2|TGFBR1|MDK|PLXND1|STRA6|WNT11|LDLR|LRP2|PRICKLE1|TBX1|LEP|HEY1|GLI3|HEY2|CHD7|HOXA1|NAGLU|BMPR1A|EGR2|JAG1|ROBO1|ROBO2|…	119	GOBP_ARTERY_DEVELOPMENT	1.8645	0.0003	GOBP_ARTERY_DEVELOPMENT	ARTERY DEVELOPMENT	Vasculature and Artery Development
16	Vasculature and Artery Development	4	4	4	0.3165	0.0028	CDH13|RNH1|STAT3|ROCK2|CDH2|DLL4|S1PR1|ENG|CDH5|E2F2|SEMA5A|E2F7|E2F8|SERPINF2|ECM1|EFNB2|FOLR1|ECSCR|SFRP1|GBX2|EDN2|EGFL7|EGLN1|HAS2|WNT7B|EGR3|HIF1A|EHD4|SHC1|EIF2AK3|ELK3|ZFPM2|EMC10|ISL1|EMILIN1|EMILIN2|ATF2|EPGN|SLIT2|EPHB1|JUN|EPHB3|EPHB4|EPN1|EPN2|ERBB2|HMGA2|LRG1|EREG|ESM1|LRP5|ETS1|ZC3H12A|MEGF8|ETV2|MIR130A|ZFP36L1|EYA1|MIR15B|MIR16-1|MIR19B1|FAP|MIR221|SRF|FASLG|MIR222|PPARG|FBLN5|MMP…	734	GOBP_BLOOD_VESSEL_MORPHOGENESIS	1.5477	0.0001	GOBP_BLOOD_VESSEL_MORPHOGENESIS	BLOOD VESSEL MORPHOGENESIS	Vasculature and Artery Development
16	Vasculature and Artery Development	3.1549	3.1549	3.1549	0.358	0.0146	VASH1|RNH1|STAT3|VASH2|ROCK2|VEGFB|VEGFC|ENG|CDH5|E2F2|SEMA5A|ECM1|ECSCR|SFRP1|AMOT|EGLN1|HIF1A|SHC1|YJEFN3|AQP1|EMC10|ISL1|EMILIN1|ZNF304|EMILIN2|ZNF354C|ATF2|IL1B|ITGB2|NPR1|EPN1|EPN2|ERBB2|HMGA2|LRG1|ETS1|ZC3H12A|MIR130A|MIR15B|MIR16-1|MIR221|FASLG|MIR222|PPARG|FBLN5|CYP1B1|FGF16|FGF18|STARD13|KRT1|FKBPL|FLT1|ANGPTL3|PML|ANGPTL4|QKI|FOXJ2|FOXO4|FUT1|SASH1|TGFB1|TGFB2|GAB1|TGFBR1|SEMA3E|GADD45A…	377	GOBP_REGULATION_OF_VASCULATURE_DEVELOPMENT	1.5472	0.0007	GOBP_REGULATION_OF_VASCULATURE_DEVELOPMENT	REGULATION OF VASCULATURE DEVELOPMENT	Vasculature and Artery Development
16	Vasculature and Artery Development	4	4	4	0.3028	0.0012	STAT3|ENG|FOLR1|GBX2|GPC3|HAS2|WNT7B|HIF1A|ZFPM2|ISL1|JUN|LRG1|ZC3H12A|MEGF8|MESP1|MIR130A|ZFP36L1|MIR15B|MIR16-1|MIR19B1|MIR221|MIR222|MMP2|NRP2|MAPK14|OVOL2|CDX4|ANGPTL3|PML|ANGPTL4|QKI|APOE|SASH1|SEMA3C|SEMA3E|MAP2K1|SEMA6A|NR2F2|RORA|SGPL1|SIRT1|SMO|XBP1|APOH|SOX17|MIR30C1|TBX1|THBS1|TMEM201|TWIST1|WNT5A|AHR|PLG|ZFAND5|PDGFD|CCR2|PGK1|CD40|CCN1|CX3CR1|CXCL13|GHRL|EPHB2|ERAP1|NF1|NFE2L2|FZD5|T…	865	GOBP_VASCULATURE_DEVELOPMENT	1.4974	0	GOBP_VASCULATURE_DEVELOPMENT	VASCULATURE DEVELOPMENT	Vasculature and Artery Development
20	Wound Healing	4	4	4	0.5256	0.0032	ACTG1|COMP|ACTN1|STXBP1|SYK|TNFSF11|F2RL3|CTNNB1|TSPAN32|VPS33B|MIP|MMRN1|WNT3A|ILK|EMILIN1|ITGB3|EMILIN2|JAK2|SERPINE2|GNAS|PTPRU|ADAMTS18|CEACAM5|TYRO3|CLIC1|ENTPD1|ADGRG1|PIK3CB|FERMT3|FIBP|GP6|GATA1|MAP2K1|LYN|TLN1|FLNA|MYL9|METAP1|MEGF10|MYL12A|PEAR1|BLOC1S4|PDIA2|TJP2|RAP2B|PPIA|SH2B3|CTNNA3|DSC2|DSG2|PLPP3|DSP|JAK1|HSPB1|TMX1|TSPAN9|JUP|CCL5|CELA2A|PRKCA|ANK3|HTR2A|CEACAM1|PLAUR|CSRP1|PDGF…	105	GOBP_HOMOTYPIC_CELL_CELL_ADHESION	1.9557	0.0001	GOBP_HOMOTYPIC_CELL_CELL_ADHESION	HOMOTYPIC CELL CELL ADHESION	Wound Healing
20	Wound Healing	2.65758	2.65758	2.65758	0.512	0.0294	ACTG1|COMP|ACTN1|STXBP1|SYK|F2RL3|TSPAN32|HSPB1|TMX1|TSPAN9|VPS33B|MMRN1|CELA2A|PRKCA|WNT3A|HTR2A|ILK|CEACAM1|EMILIN1|ITGB3|EMILIN2|CSRP1|JAK2|PDGFRA|SERPINE2|FGG|UBASH3B|GNAS|MYH9|ADAMTS18|PDIA3|SLC6A4|FGA|TYRO3|FGB|PLEK|PRKCQ|PTPN6|CLIC1|ENTPD1|ADGRG1|ALOX12|PDPN|CD9|C1QTNF1|PIK3CB|FERMT3|PRKCD|FIBP|GP6|GATA1|MFSD2B|LYN|F11R|TLN1|P2RY12|IL6|FLNA|IL6R|IL6ST|MYL9|PRKG1|HBB|METAP1|MYL12A|PEAR1|BLO…	78	GOBP_PLATELET_AGGREGATION	1.7438	0.0022	GOBP_PLATELET_AGGREGATION	PLATELET AGGREGATION	Wound Healing
20	Wound Healing	4	4	4	0.3141	0.0028	TNC|STAT3|UCK2|DDR2|S100A10|COL6A1|ENG|EPPK1|SDC4|FERMT1|SERPINF2|FOLR1|VPS33B|EPHA4|STK24|HBEGF|HIF1A|ILK|ELK3|ISL1|EMILIN1|ITGA2|EMILIN2|ITGB4|CLDN1|JUN|SMAD3|F7|ERBB2|LRG1|EREG|PUM2|MACF1|MYOF|ZFP36|ZFP36L1|MIR15B|ZFP36L2|SRC|FAP|MIR221|PPARD|SRF|MIR222|PPARG|MMP2|FUT10|OCLN|DUOX1|MAPK14|AK3|ANGPTL4|APOA4|FOXF1|F10|APOE|RREB1|FUNDC2|FZD6|TGFB1|FBLN1|FZD7|TGFB2|HNF4A|TGFBR1|GATA1|MAP2K1|MDK|TLN…	593	GOBP_RESPONSE_TO_WOUNDING	1.5277	0.0001	GOBP_RESPONSE_TO_WOUNDING	RESPONSE TO WOUNDING	Wound Healing
20	Wound Healing	2.61979	2.61979	2.61979	0.3068	0.0307	DDR2|S100A10|ENG|EPPK1|SDC4|FERMT1|SERPINF2|VPS33B|HBEGF|HIF1A|ILK|ELK3|EMILIN1|ITGA2|EMILIN2|CLDN1|SMAD3|F7|ERBB2|LRG1|EREG|MACF1|MYOF|MIR15B|SRC|FAP|MIR221|PPARD|SRF|PPARG|FUT10|OCLN|DUOX1|MAPK14|AK3|ANGPTL4|F10|APOE|RREB1|FUNDC2|FZD6|TGFB1|FBLN1|FZD7|TGFB2|HNF4A|TGFBR1|GATA1|TLN1|TMEFF2|ST3GAL4|ADRA2B|SCARB1|ADRA2C|XBP1|APOH|ARL8B|BLOC1S3|BLOC1S4|THBS1|TIMP1|ADAM17|WNT5A|ANXA8|ADORA2A|PLG|ADAM…	450	GOBP_WOUND_HEALING	1.4204	0.0024	GOBP_WOUND_HEALING	WOUND HEALING	Wound Healing
1		3.69897	3.69897	3.69897	0.7115	0.0063	SPI1|BATF|ZBTB1|ANKLE1|FLT3|HES1|SHH|FLCN|NOTCH1|SOS2|GATA3|KIT|FNIP1|NUDT21|TREX1|ZNHIT1|BCL2|HES5|SOX4|LIG4|BMP4|SOS1|PCID2|PRKDC	24	GOBP_LYMPHOID_PROGENITOR_CELL_DIFFERENTIATION	2.0056	0.0002	GOBP_LYMPHOID_PROGENITOR_CELL_DIFFERENTIATION	LYMPHOID PROGENITOR CELL DIFFERENTIATION
2		4	4	4	0.3164	0.0029	LIMD1|DHX29|DOCK5|EIF5|STYXL1|RPL11|SIX4|SMAD4|SMIM22|TNKS|PUM2|RC3H1|RPS15|MAPRE2|FITM2|SRC|CHEK2|SRF|RPL5|SH3PXD2B|SYNPO2L|RPS14|RAB11A|ATXN2|UBAP2L|RPS23|RPS27|GRB7|RPS28|RPS5|TMOD1|BICD1|KIF9|TMOD2|TMOD3|TMOD4|OFD1|TNNT1|TNNT3|BIN2|MOSPD2|KIF3B|YTHDF3|KIF4A|LDAF1|AUP1|WASHC5|WNK3|WDR1|BCCIP|FAU|BOP1|C10ORF90|JMJD6|CEP192|KAT2A|CEP63|CCDC15|CCDC57|FMR1|CCDC61|CNOT7|CCDC66|CCDC69|KAT2B|CCNB2|PT…	437	GOBP_MEMBRANELESS_ORGANELLE_ASSEMBLY	1.5235	0.0001	GOBP_MEMBRANELESS_ORGANELLE_ASSEMBLY	MEMBRANELESS ORGANELLE ASSEMBLY
6		3.52288	3.52288	3.52288	0.289	0.0089	DICER1|SS18|DKK1|TNFRSF11B|LIMD1|STAT3|DLL3|RUFY3|MIR203A|TNFSF4|ZFHX3|SORT1|YPEL4|SPDEF|SRA1|SEMA5A|IDH2|EPHA4|SFRP1|USH2A|VSX2|WNT9A|WWTR1|YY1|ELF5|ZEB1|ZFPM2|ISL1|ZHX2|SYNGAP1|TMEM131L|SIX4|CCND1|SLC4A2|EPHB1|SMAD3|EZH2|SMAD4|ERBB2|HMGA2|EREG|ID2|IFRD1|RC3H1|ESRRB|LRP5|TENT5C|ZC3H12A|MESP1|ZFP36|MIR130A|ZFP36L1|CEACAM5|MIR15B|ZFP36L2|MIR19B1|POU4F2|MIR221|PPARD|MIR222|PPARG|E2F1|MIXL1|MMP9|MST…	751	GOBP_NEGATIVE_REGULATION_OF_CELL_DIFFERENTIATION	1.422	0.0003	GOBP_NEGATIVE_REGULATION_OF_CELL_DIFFERENTIATION	NEGATIVE REGULATION OF CELL DIFFERENTIATION
35		2.4318	-2.4318	2.4318	-0.3832	0.0411	ACTG1|GPR151|CDH2|CANX|GRIK5|GSG1L|EFNB2|RNF220|NUMB|WNT3A|VAMP2|VPS35|SH3GL2|WNT7A|VAMP4|DNAJC6|ARF6|SNX9|SNCB|NAPB|RAB3B|OSBPL2|SLC18A1|SLC18A2|OTOF|SYT1|SYT11|TOR1A|GRIPAP1|PPFIA3|PREPL|PRRT2|ARPC3|FBXO45|CPLX2|RAP1BL|RAB11A|ARC|BTBD8|RIMS4|EPS15|BLOC1S6|EPS15L1|SNAP47|BRAF|SNPH|BRSK2|STX11|LRRK2|STX19|STXBP5|SV2C|C9ORF72|SYN1|SYN3|NECAP1|SYNGR3|SYP|AP3B2|AP3M1|AP3M2|AP3S1|AP3S2|ATP6V0A1|DNAJC…	260	GOBP_VESICLE_MEDIATED_TRANSPORT_IN_SYNAPSE	-1.5115	0.0037	GOBP_VESICLE_MEDIATED_TRANSPORT_IN_SYNAPSE	VESICLE MEDIATED TRANSPORT IN SYNAPSE
		2.4437	-2.4437	2.4437	-0.615	0.0402	AKR1C3|SMARCD1|EDN1|CREB1|OR51E2|HES1|PLCB1|PDK3|PDK4|KCNK4|PRKCD|CD4|FFAR3|LPL|CPT1A|HMGCS2|NR1H4|ZNF683|CDK4|ID3|KCNK2|JUND|CLDN1|FFAR2|LDLR|DGAT2|AKR1C1|AKR1C2|CCNB1|AKR1C4|MIR92A1|CPS1|ZC3H12A|UCP1|IRS1|PID1|E2F1|SREBF1|ASS1|CAV3|KCNK10	41	GOBP_CELLULAR_RESPONSE_TO_FATTY_ACID	-1.7571	0.0036	GOBP_CELLULAR_RESPONSE_TO_FATTY_ACID	CELLULAR RESPONSE TO FATTY ACID
		4	-4	4	-0.5349	0	DHX29|DRG2|EIF2S2|UNK|EIF2S3|EIF2S3B|EIF3A|EIF3B|EIF3C|EIF3CL|RPL30|EIF3E|RPS19|EIF3F|EIF3G|EIF3H|EIF3I|EIF3J|RPS12|EIF3K|EIF3L|EIF3M|EIF4A1|RPS3|EIF4A2|DENR|EIF4B|EIF4H|EIF5|EIF2D|FTSJ1|MCTS2|RPL10A|RPL11|ETF1|RPL12|RPL14|ZNF385A|RPL15|CPEB3|RPL17|DHX36|RPL18|RPL18A|HNRNPD|RPL19|RPL21|PIWIL2|RPL22L1|RPL23A|RPL26L1|RPSA|RPL27|EEF1D|RBM24|RPL27A|RPL28|RPS15|MCTS1|RPL29|DRG1|EIF3D|RPL3|MIF4GD|RPL31…	171	GOBP_CYTOPLASMIC_TRANSLATION	-2.0781	0	GOBP_CYTOPLASMIC_TRANSLATION	CYTOPLASMIC TRANSLATION
		2.67778	2.67778	2.67778	0.4241	0.029	IGF1|IGF2|CTNNB1|HES1|NR5A2|PITX2|SPDEF|DNAAF1|WLS|SFRP1|WDR19|EGFR|HIF1A|YAP1|ZIC3|TLR9|SLC4A2|SMAD3|EPHB3|NKX2-2|FOXE1|ALDH1A2|FOXF2|ID2|KIT|NKX3-2|MEGF8|CHD8|SRC|CYP1A1|MIR29B1|MIXL1|MYOCD|CCDC39|CBFA2T2|FGFR2|ADA|OVOL2|CDX4|PTK6|FOXF1|HOXA13|BARX1|CLDN18|LGR4|PCSK5|RET|BCL2|NKX2-6|TGFB1|ASCL1|TGFB2|CDKN1C|NKX6-3|HOXD13|INSR|GATA5|GATA6|GLI2|SALL1|STRA6|YIPF6|WNT11|SMO|XBP1|SOX10|SOX17|SOX9|TI…	155	GOBP_DIGESTIVE_SYSTEM_DEVELOPMENT	1.652	0.0021	GOBP_DIGESTIVE_SYSTEM_DEVELOPMENT	DIGESTIVE SYSTEM DEVELOPMENT
		2.3279	2.3279	2.3279	0.3009	0.0479	NFRKB|BOD1L1|ADRA2A|UCHL5|CHAF1A|CHAF1B|E2F7|E2F8|CARM1|ORC1|ORC4|WRNIP1|YY1|PCLAF|CCNA2|PDS5A|GRWD1|EXD2|PCNA|EREG|TFPT|CDKN1A|FAM111A|CDKN1B|POLA1|TOP1|BRCA2|UPF1|CHEK1|GINS2|PURA|TERF2|HELB|PTK6|GINS1|GINS4|FBXO5|RAD17|KIN|NASP|RAD50|RAD51|NPM2|BCL6|FGFR1|SSRP1|SUPT16H|MCM10|MCM5|MCM8|RBBP8|TRAIP|MCM9|MGME1|MMS22L|RECQL5|GLI2|KAT7|RFWD3|LRWD1|RMI2|TNFAIP1|RPA4|NYNRIN|METTL4|RTEL1|RTF2|AICDA|NA…	277	GOBP_DNA_REPLICATION	1.3827	0.0047	GOBP_DNA_REPLICATION	DNA REPLICATION
		2.61979	-2.61979	2.61979	-0.6677	0.0313	SNCA|ALDH2|DAO|DDC|GPR37|NT5DC2|HTR1A|SLC6A3|SULT1A1|SULT1A3|SULT1A4|TGFB2|VPS35|GNAT2|COMT|PRKN|HPRT1|MOXD1|MAOA|MOXD2P|MAOB|PDE1B|DBH|ATP7A|ABAT|GRIN2A|CHRNB2|ITGB2|NPR1|NR4A2|DRD1|SNCAIP|TH|SNCB|NPY|SLC1A1|TACR3|DRD2|DRD3|DRD4|ITGAM|PARK7|PNKD|GCH1	44	GOBP_DOPAMINE_METABOLIC_PROCESS	-1.8316	0.0024	GOBP_DOPAMINE_METABOLIC_PROCESS	DOPAMINE METABOLIC PROCESS
		2.49485	-2.49485	2.49485	-0.6366	0.0369	EDEM2|AUP1|UFD1|SVIP|HERPUD1|UBE2G2|RHBDD1|HSP90B1|TMEM129|DERL1|NPLOC4|BRSK2|DERL3|SYVN1|FAF2|DERL2|ERLEC1|UBAC2|AFG2B|BCAP31|SEC61B|VCP|SEL1L|OS9|UBE2J1|YOD1|HM13|SELENOS|EDEM1	29	GOBP_ENDOPLASMIC_RETICULUM_TO_CYTOSOL_TRANSPORT	-1.8127	0.0032	GOBP_ENDOPLASMIC_RETICULUM_TO_CYTOSOL_TRANSPORT	ENDOPLASMIC RETICULUM TO CYTOSOL TRANSPORT
		3.22185	3.22185	3.22185	0.5733	0.0138	CTNNA3|DSC2|DSG2|DSP|ADIPOQ|PERP|NINJ1|MADCAM1|MBP|THY1|CD1D|JUP|CD200|ITGA5|LILRB2|ITGA7|RNASE10|CD58|ITGAV|APOA1|ITGAX|IZUMO1|ITGB3|ITGA4|IL1B|ITGB7|JAM3|ITGB2|CD2|CD200R1|CXADR|FGG|KLF4|VCAM1|ITGAM|SIRPA|CEACAM6|MIR221|FGA|FGB|PTPRC|MAP2K5|PARVA|TNF|PKP2|LCK|WNK1|GLDN|ITGB1|IL1RN|MYADM|NRCAM|FLOT1|FLOT2|GCNT2|SKAP1|AGER|IL10|CD47|ITGAD|CD44|MAPK7|BMP7	63	GOBP_HETEROTYPIC_CELL_CELL_ADHESION	1.8955	0.0006	GOBP_HETEROTYPIC_CELL_CELL_ADHESION	HETEROTYPIC CELL CELL ADHESION
		3.39794	3.39794	3.39794	0.3375	0.0111	CRB2|DKK1|DLL3|ROCK2|CDH2|EDN3|EFNB1|ENG|ERBB4|SDCBP|SEMA5A|FGF19|WNT16|FOLR1|WNT2|EPHA4|SFRP1|GBX2|GLIPR2|WNT3A|WNT10A|HAS2|WNT8A|HIF1A|ZFP64|HTR2B|WWTR1|YAP1|ZFPM2|ZIC3|AMER1|ISL1|AGT|SIX4|IL1B|SMAD3|EZH2|KITLG|SMAD4|LAMA5|HMGA2|ALDH1A2|LRG1|RBM24|TRIM28|MESP1|EXOC4|MIR130A|ZFP36L1|MIR19B1|MIR221|MIR222|SOX8|FGFR2|NRP2|NRTN|OVOL2|FOXA1|QKI|TASOR|FOXD1|FOXF1|RADIL|RET|FUZ|BCL2|CYP26C1|FGFR1|SEMA…	341	GOBP_MESENCHYME_DEVELOPMENT	1.5156	0.0004	GOBP_MESENCHYME_DEVELOPMENT	MESENCHYME DEVELOPMENT
		3.22185	3.22185	3.22185	0.6589	0.014	PIR|HOXA7|CTNNBIP1|HLA-DRB1|MYC|MED1|CSF2|PDE2A|IFI16|ZBTB46|IL34|CD4|FASN|CD74|CDK6|PDE1B|MIR125B1|CSF1R|IL31RA|CSF1|JUN|INPP5D|FOXP1|MT1G|GPR68|MYH9|IRF7|THOC5|SP3|ACIN1|ZFP36L1|APCS|VEGFA|PPARG|BMP4|FES|DCSTAMP	37	GOBP_MONOCYTE_DIFFERENTIATION	1.9406	0.0006	GOBP_MONOCYTE_DIFFERENTIATION	MONOCYTE DIFFERENTIATION
		2.72125	-2.72125	2.72125	-0.4065	0.0282	UNC5B|HSPA1A|HSPA1B|C8ORF44-SGK3|WNT1|WNT16|HIF1A|YAP1|FXN|SYVN1|ZNF385A|IKBKG|TAF9|IL1B|TAF9B|CSNK2A2|CDKN2D|BCL2L1|TMBIM1|TMBIM6|EYA1|EYA2|SRC|FAIM2|MIR221|TMEM161A|MIR222|ARHGEF2|MCL1|MMP9|CREB3|CSF2|LGALS3|SLC25A31|YBX3|RFFL|BCL2|SLC25A6|TPT1|DDIAS|TGFBR1|GATA1|MAP2K1|LRRK2|QARS1|TRAP1|TXNDC12|SIRT1|SNAI1|XBP1|DNAJA1|SNAI2|HDAC1|URI1|MIR146A|THBS1|MIR17|MIR19A|TRIM32|NOS3|MIR210|HMOX1|ATAD5|U…	244	GOBP_NEGATIVE_REGULATION_OF_APOPTOTIC_SIGNALING_PATHWAY	-1.5909	0.0019	GOBP_NEGATIVE_REGULATION_OF_APOPTOTIC_SIGNALING_PATHWAY	NEGATIVE REGULATION OF APOPTOTIC SIGNALING PATHWAY
		2.60206	-2.60206	2.60206	-0.7099	0.0313	INPP5A|PLEK|FHL2|ACTN3|ATP2B4|TBC1D10C|CD22|FKBP1B|SLC24A4|CHP1|RCAN1|GSK3B|HOMER3|SLA2|MYOZ1|MYOZ2|PRNP|HOMER2|DYRK2|ITPR1|MAPK7|MTOR	22	GOBP_NEGATIVE_REGULATION_OF_CALCIUM_MEDIATED_SIGNALING	-1.8189	0.0025	GOBP_NEGATIVE_REGULATION_OF_CALCIUM_MEDIATED_SIGNALING	NEGATIVE REGULATION OF CALCIUM MEDIATED SIGNALING
		2.69897	2.69897	2.69897	0.6521	0.0283	FANCD2|SS18|WDR47|CDH2|DLL1|JAG1|ASPM|HES1|PROX1|SRRT|FOXO1|IGF2BP1|FOXO3|NOTCH1|REST|SOX2|HOOK3|HES5|MCPH1|YME1L1|MMP24|FUT10|PRRX1|PCM1	24	GOBP_NEURONAL_STEM_CELL_POPULATION_MAINTENANCE	1.8188	0.002	GOBP_NEURONAL_STEM_CELL_POPULATION_MAINTENANCE	NEURONAL STEM CELL POPULATION MAINTENANCE
		2.42022	-2.42022	2.42022	-0.3634	0.0416	SLC5A8|TNFRSF11A|TNFSF11|ABCD1|BEST2|BEST4|CA4|CYB5R1|CYB5R2|GOT2|CYB5RL|SLC26A1|FGF19|SLC26A10P|FOLR1|SLC26A2|SLC26A4|SLC26A5|SLC26A8|SLC26A9|ACE2|ACSL1|SLC39A14|ACSL3|SLC39A4|ACSL4|SLC39A5|ACSL5|SLC4A11|SLC4A5|SLC4A9|ABCC11|SLC27A1|ABCC2|IRS2|ABCC3|ABCD3|SLC10A1|SLC10A2|SLC10A3|SLC4A2|SLC10A4|SLC10A5|SLC10A6|SLC27A5|SLCO1A2|SLCO1B1|SLCO1B3|SLC17A1|SLCO1B3-SLCO1B7|SLCO1B7|SLCO1C1|SLC17A2|SLCO2B1…	467	GOBP_ORGANIC_ANION_TRANSPORT	-1.4742	0.0038	GOBP_ORGANIC_ANION_TRANSPORT	ORGANIC ANION TRANSPORT
		2.34679	-2.34679	2.34679	-0.3556	0.046	SPN|STAT3|ROCK2|TNFSF4|FERMT1|SERPINF2|IL17B|IL26|HIF1A|HTR2B|EIF2AK3|HYAL2|ISL1|ATF2|DHX36|SMAD3|MIR324|EREG|SPTBN1|ARID5A|PANX2|MAPK14|MAPKAPK2|FLT4|MYD88|PTPN11|TNFRSF8|RBM47|TIRAP|C1QTNF3|TGFB1|LPL|MDK|GLMN|WNT11|RORA|SEMA7A|SIRT1|XBP1|THBS1|DDT|TRIM27|GPSM3|TRIM32|TNFRSF14|ADAM17|TWIST1|WNT5A|TRPV4|AIRE|AKIRIN2|HMOX1|TYROBP|ZNF580|B2M|AFAP1L2|BATF|BCL3|HPSE|CAMK4|CARD9|CCL19|CCR2|HSPB1|CCDC8…	519	GOBP_POSITIVE_REGULATION_OF_CYTOKINE_PRODUCTION	-1.446	0.0045	GOBP_POSITIVE_REGULATION_OF_CYTOKINE_PRODUCTION	POSITIVE REGULATION OF CYTOKINE PRODUCTION
		2.58503	-2.58503	2.58503	-0.4167	0.0322	AKR1C3|CYGB|STAT3|COL6A1|ABCD1|PRG3|STK17A|ACE2|SHC1|MAOB|AGT|AGTR1|INAVA|ITGB2|AKR1C1|CDKN1A|ZC3H12A|ITGAM|SLC18A2|CYP1A1|CYP1A2|FBLN5|CYP1B1|SH3PXD2B|ELAVL1|NOXO1|DUOX1|MAPK14|DUOXA2|DHRS4|FAM210B|APOA4|LETMD1|FOXO3|BCL2|LIPA|BCR|HBZ|TGFB1|DDIT4|GADD45A|BST1|LRRK2|TRAP1|NCF4|TSPO|ABCB7|SESN2|MIR181A2|MIR27B|THBS1|NOS3|CCN2|NCF1|HK2|ARG2|CLCN3|TYROBP|NAGLU|TAFA4|CFLAR|VDAC1|PDK3|TUSC2|PDK4|CD177…	244	GOBP_REACTIVE_OXYGEN_SPECIES_METABOLIC_PROCESS	-1.5874	0.0026	GOBP_REACTIVE_OXYGEN_SPECIES_METABOLIC_PROCESS	REACTIVE OXYGEN SPECIES METABOLIC PROCESS
		3.1549	-3.1549	3.1549	-0.7227	0.0152	SNCA|COX17|EDN1|GZMA|CDH3|GLA|ECSIT|NT5DC2|NPR3|OXA1L|RFK|EDN2|PRKN|ESR1|SIRT3|SIRT4|IL1B|NOSIP|INS|DRD5|PHB2|FGF23|SPHK2|LEP|PRDX5|MT3|GCH1|SZT2	28	GOBP_REGULATION_OF_OXIDOREDUCTASE_ACTIVITY	-1.9387	0.0007	GOBP_REGULATION_OF_OXIDOREDUCTASE_ACTIVITY	REGULATION OF OXIDOREDUCTASE ACTIVITY
		2.34679	-2.34679	2.34679	-0.6705	0.046	CRB2|FETUB|SPOCK2|TANK|MBP|ECM1|RCN3|VSIR|SERPINB1|A2ML1|EPPIN|PSENEN|SERPINB3|ATP13A2|PRELID1|UBXN1|PRSS22|GRN|SPOCK3|TIMP2|VCP|SERPINB4|SERPINB13|TIMP1|SERPINB9|CR1|SEMG1|SEMG2|SERPINB8|SVBP|GAPDH|RECK	32	GOBP_REGULATION_OF_PEPTIDASE_ACTIVITY	-1.7986	0.0045	GOBP_REGULATION_OF_PEPTIDASE_ACTIVITY	REGULATION OF PEPTIDASE ACTIVITY
		2.42022	2.42022	2.42022	0.5562	0.0415	MC4R|RELN|PENK|STAT3|GHSR|GHRH|GHRHR|ZFHX3|SLC24A4|ADRB1|BAIAP3|ARRDC3|HDAC2|VPS35|NR1D1|CFAP20|HTR2B|AHI1|NR4A3|CNTNAP4|CHRNB2|PARP1|TACR3|DRD2|EIF2AK4|GHRL|EPHB2|GRP|DLG4|FXR1|GRIA1|NLGN1|NMU|GRPR|KCNA2|HCRTR2|INSL5|AIM2|LEPR|CSF2|RAG1|MBD5|ADORA1|HTR1A|HTR1B|HTR1D|APOE|NPAS2|CRH|NPSR1|NPY2R|GNB3|OPRK1|MDK|MTOR|MTNR1B|PER3|NPS|STRA6|UCN|INS|PTGDS|MEF2C|AGRP|QRFP|CCL3|NPY|GPR171|RETN|NAPEPLD|RXF…	77	GOBP_REGULATION_OF_BEHAVIOR	1.7686	0.0038	GOBP_REGULATION_OF_BEHAVIOR	REGULATION OF BEHAVIOR
		3.09691	3.09691	3.09691	0.3984	0.0162	BNIP2|DKK1|TUNAR|ZFHX3|SOCS2|FERD3L|MYCL|SFRP1|WNT3A|ZEB1|ISL1|ZHX2|BCL11A|ID2|CDK5RAP3|FGF20|NCOA1|EYA1|POU4F2|ARHGEF2|SOX8|FOXA1|DISP3|HMG20A|FOXO3|HMG20B|DTX1|BCL2|BCL6|FGFR1|ASCL1|FEZF1|FEZF2|CNTN4|LRRK2|MAP3K13|PBX1|CALR|TRPC5|NGF|ADRA2B|ADRA2C|RNF112|MEF2C|ALK|SOX9|MIR146A|TRIM32|HES5|MICOS10-NBL1|ISL2|HEY1|HEY2|HEYL|NBL1|SIX3|CNTN2|B2M|LMX1A|YWHAG|CDK5R1|DAB1|MAP1B|NEUROG3|IRX3|BRINP2|NREP…	199	GOBP_REGULATION_OF_NEURON_DIFFERENTIATION	1.6353	0.0008	GOBP_REGULATION_OF_NEURON_DIFFERENTIATION	REGULATION OF NEURON DIFFERENTIATION
		2.74473	2.74473	2.74473	0.4581	0.028	OCIAD1|CHD3|FGF2|STAT3|NKX2-5|BMPR1A|MBD3|JAG1|HES1|NR5A2|GDNF|GSK3B|MIR302B|FOXC1|PWP1|BBS12|HDAC2|WNT3|YTHDF2|SLC4A11|YAP1|CDK6|MTCH2|PDGFRA|DHX36|EZH2|KDM4C|CDK13|RBM24|NOTCH1|TRIM6|ESRRB|NUDT21|ITCH|TGFBR2|SETD1A|FZD1|ZFP36L2|HNRNPU|PUS7|NFE2L2|PRKDC|LBH|METTL3|MTA2|PTN|KDM3A|SMYD5|TACSTD2|NELFB|EIF2AK2|MTA1|N4BP2L2|CHD4|HOXB4|TBX3|CDK12|TBX5|MIR372|GATAD2A|GATAD2B|TCF15|TGFB2|HSPA9|RBBP4|TEA…	86	GOBP_REGULATION_OF_STEM_CELL_DIFFERENTIATION	1.7227	0.0018	GOBP_REGULATION_OF_STEM_CELL_DIFFERENTIATION	REGULATION OF STEM CELL DIFFERENTIATION
		3.52288	3.52288	3.52288	0.3459	0.0084	INVS|LGR5|UPK3A|DDC|ERBB4|SDC4|PYGO1|PYGO2|SNX17|WNT1|EFNB2|EPHA4|SFRP1|WNT2B|GPC3|WNT6|COMT|HAS2|WNT7B|WNT9B|OVOL1|WWTR1|YAP1|HYAL2|ILK|AMER1|AQP1|AQP2|ARID5B|ITGA3|AGT|SIX4|AGTR1|SLIT2|AKR1B1|SMAD3|EZH2|SMAD4|LAMA5|ALDH1A2|ID2|IFT25|EYA1|MMP9|SOX8|FGFR2|CRLF1|FOXD1|FOXF1|TACSTD2|LGR4|RET|GFRA1|BCL2|FGFR1|TGFB1|TGFB2|BLOC1S6|CDKN1C|BMP10|TGFBR1|LRRK2|PBX1|GLI2|SALL1|STRA6|WNT11|WT1|SGPL1|GREM1|S…	335	GOBP_RENAL_SYSTEM_DEVELOPMENT	1.5366	0.0003	GOBP_RENAL_SYSTEM_DEVELOPMENT	RENAL SYSTEM DEVELOPMENT
		2.95861	2.95861	2.95861	0.3639	0.0194	TNC|DLX5|COL6A1|SPDEF|WNT2|WNT2B|EDA|EDN2|GPC3|WNT7B|YAP1|YWHAZ|ZFPM2|ZIC3|ITGA3|SIX4|ERRFI1|LAMA5|HMGA2|ALDH1A2|ALDH1A3|SIM2|IFT25|SRF|CYP1A2|TMEM38B|CCDC39|FGF18|FGFR2|CREB1|FLT4|FOXA1|FOXF1|FOXP2|LIPA|FGFR1|TGFB1|ASCL1|BLOC1S6|TGFB3|CRH|MAP2K1|GATA6|GLI2|MAPK1|STRA6|WNT11|WT1|GRHL2|PGR|SOX9|ATXN1|HSD11B1|NOS3|CCN2|HESX1|WDPCP|WNT5A|AGR2|CDC42|CHD7|HOPX|VANGL2|HOXA5|ITGB6|CELSR1|CRISPLD2|ELK1|R…	232	GOBP_RESPIRATORY_SYSTEM_DEVELOPMENT	1.5619	0.0011	GOBP_RESPIRATORY_SYSTEM_DEVELOPMENT	RESPIRATORY SYSTEM DEVELOPMENT
		2.67778	2.67778	2.67778	0.5819	0.0292	STAT3|IGF1|GHSR|JAK1|JAK3|SOCS2|MBD5|GH2|GH1|LEPROT|LEPROTL1|GHR|HNF4A|SLC34A1|HMGCS2|LYN|STAT5A|PTPN1|STAT5B|PXN|GDF15|AKT1|IGFBP5|JAK2|SRD5A1|F7|STAT6|CPS1|PNPT1|PHEX|GHRL|TRIM16|PIK3R1|SHOC2|TYK2|CACYBP|CSF2RA|CSH1|ASS1|CSH2|CSHL1|PTK2	42	GOBP_RESPONSE_TO_GROWTH_HORMONE	1.7932	0.0021	GOBP_RESPONSE_TO_GROWTH_HORMONE	RESPONSE TO GROWTH HORMONE
		2.63827	-2.63827	2.63827	-0.6877	0.0302	LRP6|CDKN2A|GRIA4|EDN1|IGF1|MAP2K5|IL12B|MFN2|RBM10|MIR138-1|LYPD3|IFNG|MIR21|ATF4|SLC7A5|MAP2K4|ESR1|STUB1|NR4A3|MIR1-1|DIPK2A|SIRT1|BAG1|APOH|MIR92A1|PDCD4|FOXO1|ADCY10|DNMT1|MIR140|MIR17|SOD2|IL12A|MIR28|PDE1A|MIR210|MIR24-1|PPARG|E2F3|MAPK7	40	GOBP_SMOOTH_MUSCLE_CELL_APOPTOTIC_PROCESS	-1.8923	0.0023	GOBP_SMOOTH_MUSCLE_CELL_APOPTOTIC_PROCESS	SMOOTH MUSCLE CELL APOPTOTIC PROCESS
		2.69897	2.69897	2.69897	0.6226	0.0283	NEFL|RELN|CAMK2B|DAB2IP|DAB1|LNX1|SNX27|ROCK1|NEURL1|NEUROD2|SEZ6L|SEZ6L2|C1QL2|VPS35|DLGAP4|SHANK1|YWHAZ|BCAN|PALM|DISC1|FGF22|SEMA7A|NRXN1|CNTNAP1|CX3CR1|NFATC4|FGF7|PFN1|IGSF21|CHRDL1|CLSTN1|IGSF9|PTEN|NRN1|AGO2|ANAPC2|ARHGEF15|SEZ6|ADGRB3|CDC20|SYBU|NFIA|CCDC39	43	GOBP_SYNAPSE_MATURATION	1.8337	0.002	GOBP_SYNAPSE_MATURATION	SYNAPSE MATURATION

## Sheet: GO-BP GSNOR OEvsWT
Cluster names	EnrichmentMap::-log10(pvalue) (GO:BP-OE)	EnrichmentMap::-log10(pvalue)*sign(NES) (GO:BP-OE)	EnrichmentMap::ES (GO:BP-OE)	EnrichmentMap::fdr_qvalue (GO:BP-OE)	EnrichmentMap::Genes	EnrichmentMap::gs_size	EnrichmentMap::Name	EnrichmentMap::NES (GO:BP-OE)	EnrichmentMap::pvalue (GO:BP-OE)	name	Name Clean
Antibacterial Defense	4	-4	-0.4237	0.0002	HAVCR2|SIGIRR|TNFSF4|CARD16|CARD17P|EFNB2|ANKRD1|CASP7|IL1B|CCR5|IRAK1|IRAK2|AXL|IRAK3|IRAK4|CDK19|IRF3|IRF5|IRGM|UPF1|ZC3H12A|ZFP36|ARID5A|MIR19B1|PPARD|MMP9|KLRC4-KLRK1|SPI1|KLRK1|MAPK14|MYD88|CSF2|PTPN11|LBP|TIRAP|LILRA2|SASH1|BCR|LTF|GATA1|LY96|LYN|MALT1|MRC1|MAPK1|MAPK8|TSPO|SCARB1|XBP1|MEF2C|MIR140|HDAC5|MIR146A|MIR17|MIR19A|NOS3|WNT5A|AHR|AICDA|ADAMTS13|AKAP8|B2M|NFKB1|NFKBIA|NFKBIL1|NFKBI…	250	GOBP_CELLULAR_RESPONSE_TO_MOLECULE_OF_BACTERIAL_ORIGIN	-1.9473	0	GOBP_CELLULAR_RESPONSE_TO_MOLECULE_OF_BACTERIAL_ORIGIN	CELLULAR RESPONSE TO MOLECULE OF BACTERIAL ORIGIN
Antibacterial Defense	4	-4	-0.4275	0.0003	HAVCR2|SPN|HLA-A|VGF|IGHA1|IGHA2|IGHD|IGHE|TRAV27|ANG|IGHG1|BPIFA1|IGHG2|IGHG3|CASP4|IGHG4|IGHM|SHC1|CASP7|OPTN|AQP1|EMILIN1|EMILIN2|ZG16|IKBKG|IL1B|IRGM|SYT11|KLRC4-KLRK1|DEFB1|KLRK1|MYD88|TAC1|LBP|TIRAP|LTF|MAP3K7|MAVS|MBL2|GRN|MIR140|TREM1|TNFRSF14|ADAM17|GSDMB|NCF1|PCYOX1L|AICDA|AKIRIN2|SEMG1|ADAMTS4|SEMG2|ARG2|NAGK|NAIP|B2M|BCL3|KLK5|NFKB1|ADAMTS5|BPIFA2|NFKBIZ|CARD9|NLRC4|BPI|NLRP1|DEFA1|NL…	352	GOBP_DEFENSE_RESPONSE_TO_BACTERIUM	-1.9304	0	GOBP_DEFENSE_RESPONSE_TO_BACTERIUM	DEFENSE RESPONSE TO BACTERIUM
Antibacterial Defense	2.58503	-2.58503	-0.5523	0.0278	HAMP|LALBA|IL12B|IL23A|IL23R|ROMO1|RPL30|RPS19|IL22RA1|TSLP|AZU1|LYZ|TLR4|IGHM|OPTN|AQP1|TLR9|CHGA|CALCA|LCE3A|LCE3B|LCE3C|TREM2|IRGM|LYPD8|ADGRB1|CAMP|DEFB1|APP|TAC1|LBP|ADM|LTF|TREM1|TNFRSF14|GSDMB|IL17A|IL17F|B2M|DAO|PRB3|CD160|NFKBIZ|BPI|DEFA1|DEFA1B|TUSC2|DEFA3|DEFA4|DEFA5|DEFA6|DMBT1|NOD1|CD4|H2BC11|NOS2|H2BC12|SERPINE1|RNASE2|RNASE3|MPEG1|MR1|RNASE6|RNASE7|CST11|SELP|VIP|CXCL6|DEFB136|DEFB…	112	GOBP_DEFENSE_RESPONSE_TO_GRAM_NEGATIVE_BACTERIUM	-1.8316	0.0026	GOBP_DEFENSE_RESPONSE_TO_GRAM_NEGATIVE_BACTERIUM	DEFENSE RESPONSE TO GRAM NEGATIVE BACTERIUM
Antibacterial Defense	3.69897	-3.69897	-0.5242	0.0045	HAMP|HAVCR2|LALBA|HLA-A|LYG1|KRT6A|LYG2|PGLYRP1|PGLYRP2|IL18|PGLYRP3|PGLYRP4|TBK1|HCK|ROMO1|STAB2|TRAV27|ANG|LYZ|TLR2|CASP4|ZG16|IL1B|CHGA|CALCA|LCE3A|LCE3B|LCE3C|EPHA2|CAMP|KLRC4-KLRK1|DEFB1|KLRK1|MYD88|APP|TAC1|LBP|ADM|TIRAP|LTF|MBL2|IL12A|TNFRSF14|ADAM17|IL17A|C5AR1|IL17F|NCF1|IL27RA|B2M|PPP1R11|IL7R|SEH1L|CARD9|DEFA1|DEFA1B|DEFA3|DEFA4|NLRP6|DEFA5|DEFA6|DMBT1|NOD1|FAU|TNFSF8|H2BC10|H2BC11|H2B…	135	GOBP_DEFENSE_RESPONSE_TO_GRAM_POSITIVE_BACTERIUM	-1.9204	0.0002	GOBP_DEFENSE_RESPONSE_TO_GRAM_POSITIVE_BACTERIUM	DEFENSE RESPONSE TO GRAM POSITIVE BACTERIUM
Antibacterial Defense	4	-4	-0.3727	0	SIGIRR|SPN|TNFRSF11A|TNFSF4|COL6A1|SELE|FGF19|EFNB2|GPC3|BPIFA1|SHC1|EMILIN1|EMILIN2|SLC10A2|CLDN1|LRG1|UPF1|ZC3H12A|ZFP36|PLAAT3|ARID5A|MIR19B1|PPARD|FASLG|E2F1|MMP9|FGFR2|HNRNPA0|SPI1|MAPK14|MAPKAPK2|MYD88|PTPN11|TAC1|TIRAP|SASH1|FUCA2|LPL|GATA1|MRC1|TSPO|SCARB1|XBP1|GRN|HDAC5|TNFRSF14|ADAM17|GSDMB|NCF1|WNT5A|AHR|PCYOX1L|AICDA|CHD7|ADAMTS13|AKIRIN2|ADAMTS4|AKAP8|ARG2|ALAD|ATP4B|B2M|FAM20A|B3GAL…	762	GOBP_RESPONSE_TO_BACTERIUM	-1.9213	0	GOBP_RESPONSE_TO_BACTERIUM	RESPONSE TO BACTERIUM
Antibacterial Defense	4	-4	-0.4172	0	HAVCR2|SIGIRR|TNFRSF11A|TNFSF4|COL6A1|WDR83|SELE|CARD16|CARD17P|EFNB2|ANKRD1|CASP7|CLDN1|IL1B|CCR5|INAVA|IRAK1|IRAK2|AXL|IRAK3|IRAK4|CDK19|IRF3|VCAM1|IRF5|IRGM|UPF1|ZC3H12A|ZFP36|ARID5A|MIR19B1|PPARD|FASLG|CYP1A1|E2F1|MMP9|KLRC4-KLRK1|FGFR2|HNRNPA0|SPI1|KLRK1|MAPK14|MAPKAPK2|MYD88|CSF2|PTPN11|TAC1|LBP|LETMD1|TIRAP|LILRA2|SASH1|BCR|LTF|GATA1|LY96|LYN|MALT1|MRC1|MAPK1|MAPK8|MAPKAPK3|TSPO|SCARB1|XBP…	376	GOBP_RESPONSE_TO_MOLECULE_OF_BACTERIAL_ORIGIN	-2.0549	0	GOBP_RESPONSE_TO_MOLECULE_OF_BACTERIAL_ORIGIN	RESPONSE TO MOLECULE OF BACTERIAL ORIGIN
Antibacterial Defense	4	-4	-0.3613	0.0026	HAVCR2|SIGIRR|TNFSF4|CARD16|CARD17P|EFNB2|ANKRD1|CASP7|EIF2AK3|IL1B|CCR5|IRAK1|IRAK2|AXL|IRAK3|IRAK4|CDK19|IRF3|IRF5|IRGM|UPF1|ZC3H12A|ZFP36|ARID5A|MIR19B1|PPARD|MMP9|KLRC4-KLRK1|SPI1|KLRK1|MAPK14|MYD88|CSF2|PTPN11|LBP|TIRAP|LILRA2|SASH1|BCR|LTF|GATA1|LY96|LYN|MALT1|MRC1|MAPK1|MAPK8|TSPO|SCARB1|TXNIP|XBP1|MEF2C|MIR140|HDAC5|MIR146A|MIR17|MIR19A|NOS3|WNT5A|AHR|AICDA|ADAMTS13|AKAP8|B2M|NFKB1|NFKBIA…	277	GOBP_CELLULAR_RESPONSE_TO_BIOTIC_STIMULUS	-1.701	0.0001	GOBP_CELLULAR_RESPONSE_TO_BIOTIC_STIMULUS	CELLULAR RESPONSE TO BIOTIC STIMULUS
Antigen Presentation & Cytotoxic Immunity	4	-4	-0.6123	0.0004	USP5|HAVCR2|XCL1|IL4I1|SPN|HLA-A|IL7R|SUSD4|JAK3|GRB2|CCR2|CD300A|LGALS9|LILRB4|CD46|LILRB1|SLAMF1|CD80|CD84|CD96|CRK|CEACAM1|MAPK3|KIR2DL4|CLEC4G|MICA|INPP5D|NECTIN2|CLEC12B|CX3CR1|NDFIP1|SERPINB4|SMAD7|PARP3|CR1|CR1L|PDCD1|CR2|KLRC1|PPP3CB|KLRD1|PTPN6|SPI1|PTPRC|PVR|HFE|HLA-B|DUSP22|ARRB2|FOXF1|RABGEF1|TIGIT|BCL6|BCR|HLA-F|TGFB1|HLA-G|HLA-E|BST2|FCGR2B|IL20RB|NECTIN4|IFNA2|IFNB1|TBX21|ARG1|SERP…	76	GOBP_NEGATIVE_REGULATION_OF_LEUKOCYTE_MEDIATED_IMMUNITY	-2.1769	0	GOBP_NEGATIVE_REGULATION_OF_LEUKOCYTE_MEDIATED_IMMUNITY	NEGATIVE REGULATION OF LEUKOCYTE MEDIATED IMMUNITY
Antigen Presentation & Cytotoxic Immunity	4	-4	-0.6117	0.002	AZGP1|STAP1|B2M|NCR3|XCL1|AP1G1|HLA-A|CD160|HLA-DRB1|IL12B|IL12RB1|CD226|IL23A|IL23R|CD1A|CD1B|CD1C|LAG3|POMC|CD1D|CD1E|CD5L|NOS2|STAT5A|STAT5B|MR1|NECTIN2|CYRIB|ITGAM|P2RX7|RASGRP1|KLRC1|KLRC2|KLRC3|KLRC4|PRF1|KLRC4-KLRK1|KLRD1|SPI1|KLRK1|PTPRC|PVR|HLA-B|RAET1E|HLA-C|RAET1G|VAV1|RAET1L|HLA-DRA|HLA-F|HLA-G|HLA-H|HLA-E|F2RL1|LAMP1|MAPK8|SLAMF6|SLC22A13|STX7|SH2D1A|TAP2|ARG1|IL12A|CADM1|CRTAM|IL18R…	72	GOBP_POSITIVE_REGULATION_OF_CELL_KILLING	-2.0922	0.0001	GOBP_POSITIVE_REGULATION_OF_CELL_KILLING	POSITIVE REGULATION OF CELL KILLING
Antigen Presentation & Cytotoxic Immunity	3.69897	-3.69897	-0.3302	0.0043	SPN|TFRC|TNFSF4|SNX6|DHX36|ARID5A|SPI1|SWAP70|MYD88|FOXF1|TGFB1|GATA1|LAMP1|NECTIN4|ARL8B|CD27|CD70|EBAG9|ADAM17|NCF1|AHR|PCYOX1L|AICDA|AIRE|KIF5B|APLF|TYROBP|ATAD5|AZGP1|B2M|BATF|BCL3|C17ORF99|CAMK4|CARD9|CCR2|CCR6|CD1A|WDR1|CD1B|CD1C|CD1D|CD1E|CD177|CD40|CD40LG|CD7|CD74|CD80|CD84|CD96|CLCF1|CLEC4G|CSF2RB|CLEC12B|CTSC|CLEC2A|CTSH|CLNK|CX3CR1|SPON2|DDX1|DDX21|ERCC1|CXCL6|EXO1|EXOSC3|EXOSC6|FBXO38…	479	GOBP_LEUKOCYTE_MEDIATED_IMMUNITY	-1.6347	0.0002	GOBP_LEUKOCYTE_MEDIATED_IMMUNITY	LEUKOCYTE MEDIATED IMMUNITY
Antigen Presentation & Cytotoxic Immunity	4	-4	-0.4595	0.0028	STAP1|HAVCR2|HLA-A|HLA-DRB1|IL12B|IL12RB1|IL18|GRB2|IL23A|IL23R|TUBB|TUBB4B|LGALS9|AZU1|IGHE|VAMP2|IGHG1|RIPK3|STAT5A|STAT5B|KIR2DL4|KIR3DL1|KLRB1|KLRF2|CD2|INPP5D|CEBPG|NECTIN2|ITGAM|LYST|RASGRP1|KLRC1|KLRC2|KLRC3|KLRC4|KLRC4-KLRK1|KLRD1|SPI1|KLRK1|MYD88|VAV1|ARRB2|PIK3CB|PIK3R6|TGFB1|NCR1|LAMP1|NECTIN4|ARL8B|TREM1|EBAG9|IL12A|PLEKHM2|LEP|NCF1|PCYOX1L|IL18RAP|KIF5B|ULBP1|IL21|ULBP2|NCKAP1L|ULBP3…	155	GOBP_LEUKOCYTE_MEDIATED_CYTOTOXICITY	-1.9199	0.0001	GOBP_LEUKOCYTE_MEDIATED_CYTOTOXICITY	LEUKOCYTE MEDIATED CYTOTOXICITY
Antigen Presentation & Cytotoxic Immunity	2.3279	-2.3279	-0.3715	0.0429	HLA-A|TFRC|HLA-DRB1|IL12B|TNFSF4|HLA-DRB3|IL12RB1|IL18|IL2|IL23A|IL23R|HSPD1|ZP3|SLAMF1|JAK2|IL1B|NECTIN2|TRAF6|TREM2|ARID5A|ADA|MAD2L2|MIR21|TGFB1|BTK|MALT1|MAP3K7|SIRT1|C3|IL12A|IL18R1|TYK2|AKIRIN2|IL1R1|ULBP1|ULBP2|ULBP3|IL27RA|ATAD5|AZGP1|B2M|IL4|XCL1|YWHAG|ZBTB1|BRD2|BRD4|NFKBID|C17ORF99|CD226|NFKBIZ|CARD9|CCR2|CD28|KLHL22|CD1A|KMT5B|NLRP10|CD1B|KMT5C|CD1C|NLRP3|CD1D|CD1E|CD4|CD40|CD55|CD7|C…	136	GOBP_POSITIVE_REGULATION_OF_ADAPTIVE_IMMUNE_RESPONSE	-1.6127	0.0047	GOBP_POSITIVE_REGULATION_OF_ADAPTIVE_IMMUNE_RESPONSE	POSITIVE REGULATION OF ADAPTIVE IMMUNE RESPONSE
Antigen Presentation & Cytotoxic Immunity	2.4437	-2.4437	-0.5148	0.0353	B2M|HLA-A|UNC93B1|HLA-DPB1|HLA-DQB1|CTSD|HLA-DRB1|LNPEP|CTSE|HLA-DRB3|CTSF|HLA-DMA|CTSV|HLA-DMB|HLA-DOA|HLA-DOB|IFI30|HLA-DPA1|LGMN|HLA-DQA1|HLA-DQA2|MFSD6|HLA-DQB2|PIKFYVE|FCGR1A|HLA-DRA|HLA-DRB4|HLA-DRB5|HLA-F|CD74|FCER1G|HLA-E|FCGR2B|CLEC4A|IKBKB|MPEG1|CTSL|TRAF6|TAP2|DNM2|CTSS	41	GOBP_ANTIGEN_PROCESSING_AND_PRESENTATION_OF_EXOGENOUS_PEPTIDE_ANTIGEN	-1.7643	0.0036	GOBP_ANTIGEN_PROCESSING_AND_PRESENTATION_OF_EXOGENOUS_PEPTIDE_ANTIGEN	ANTIGEN PROCESSING AND PRESENTATION OF EXOGENOUS PEPTIDE ANTIGEN
Antigen Presentation & Cytotoxic Immunity	4	-4	-0.7602	0.0001	AZGP1|B2M|HLA-A|HFE|HLA-B|HLA-DRB1|RAET1E|HLA-C|RAET1G|RAET1L|IDE|TAP1|TAP2|HLA-DRA|ERAP1|HLA-F|ERAP2|HLA-G|HLA-H|HLA-E|ULBP1|ULBP2|TAPBP|ULBP3	24	GOBP_ANTIGEN_PROCESSING_AND_PRESENTATION_OF_ENDOGENOUS_PEPTIDE_ANTIGEN	-2.3689	0	GOBP_ANTIGEN_PROCESSING_AND_PRESENTATION_OF_ENDOGENOUS_PEPTIDE_ANTIGEN	ANTIGEN PROCESSING AND PRESENTATION OF ENDOGENOUS PEPTIDE ANTIGEN
Antigen Presentation & Cytotoxic Immunity	3.69897	-3.69897	-0.3818	0.0035	HAVCR2|SPN|HLA-A|TFRC|HLA-DRB1|TNFSF4|HLA-DRB3|HSPD1|ALOX15|ANXA1|IL1B|IRF1|RC3H1|IRF7|ZC3H12A|ARID5A|KLRC1|KLRD1|BCL6|TGFB1|MALT1|MAP3K7|SIRT1|MEF2C|TRIM27|TNFRSF14|ADCY7|AHR|TYK2|AKIRIN2|UFL1|ULBP1|APLF|ULBP2|ULBP3|ASCL2|ATAD5|AZGP1|USP5|B2M|XCL1|YWHAG|BATF|ZBTB1|ZBTB7B|BRD2|BRD4|NFKBID|C17ORF99|NFKBIZ|CARD9|CCL19|CCR2|CD1A|NLRP10|CD1B|CD1C|NLRP3|CD1D|CD1E|CD4|CD40|CD69|CD7|CD80|CLCF1|CLEC4G|DU…	222	GOBP_REGULATION_OF_ADAPTIVE_IMMUNE_RESPONSE	-1.7549	0.0002	GOBP_REGULATION_OF_ADAPTIVE_IMMUNE_RESPONSE	REGULATION OF ADAPTIVE IMMUNE RESPONSE
Antigen Presentation & Cytotoxic Immunity	4	-4	-0.6307	0.0002	AZGP1|B2M|HLA-A|HFE|HLA-B|LNPEP|RAET1E|HLA-C|RAET1G|RAET1L|IDE|IFI30|MFSD6|FCGR1A|HLA-F|HLA-G|HLA-H|FCER1G|HLA-E|SAR1B|TAPBP|TAPBPL|CALR|CLEC4A|IKBKB|ACE|MPEG1|MR1|TAP1|TAP2|ERAP1|ERAP2|PDIA3|ULBP1|ULBP2|ULBP3|ABCB9	37	GOBP_ANTIGEN_PROCESSING_AND_PRESENTATION_OF_PEPTIDE_ANTIGEN_VIA_MHC_CLASS_I	-2.194	0	GOBP_ANTIGEN_PROCESSING_AND_PRESENTATION_OF_PEPTIDE_ANTIGEN_VIA_MHC_CLASS_I	ANTIGEN PROCESSING AND PRESENTATION OF PEPTIDE ANTIGEN VIA MHC CLASS I
Antigen Presentation & Cytotoxic Immunity	2.92082	-2.92082	-0.3367	0.0153	SNX4|HLA-A|TFRC|HLA-DRB1|TNFSF4|HLA-DRB3|HSPD1|IFNG|VAMP3|ANXA1|IL1B|DHX36|INAVA|ITGB2|IRF5|ITGAM|ARID5A|KLRC1|KLRC2|KLRC3|KLRC4|KLRC4-KLRK1|KLRD1|SPI1|KLRK1|LACC1|MAPKAPK2|MYD88|LBP|TGFB1|GAB2|DDRGK1|GATA1|LAMP1|MALT1|MAP3K7|GPI|SEMA7A|SIRT1|MAVS|MBL2|XBP1|TNFRSF14|WNT5A|MIR520B|MIR520E|ULBP1|ULBP2|ULBP3|TYROBP|ATAD5|AZGP1|B2M|NCR3|XCL1|YWHAG|ZBTB1|BRD2|KLK5|BRD4|NFKBID|C17ORF99|RBP4|CAMK4|NFKBI…	276	GOBP_POSITIVE_REGULATION_OF_IMMUNE_EFFECTOR_PROCESS	-1.5802	0.0012	GOBP_POSITIVE_REGULATION_OF_IMMUNE_EFFECTOR_PROCESS	POSITIVE REGULATION OF IMMUNE EFFECTOR PROCESS
Antigen Presentation & Cytotoxic Immunity	4	-4	-0.56	0.0001	AZGP1|B2M|HLA-A|HLA-DPB1|HLA-DQB1|HLA-DRB1|HLA-DRB3|IDE|CD209|CD74|CLEC4A|IKBKB|MARCHF8|CLEC4M|MPEG1|MR1|CTSL|TRAF6|TREM2|ERAP1|ERAP2|PDIA3|DNM2|CTSS|UNC93B1|HFE|CTSD|HLA-B|LNPEP|RAET1E|CTSE|HLA-C|RAET1G|CTSF|HLA-DMA|RAET1L|CTSV|HLA-DMB|HLA-DOA|HLA-DOB|IFI30|HLA-DPA1|LGMN|HLA-DQA1|MARCHF1|HLA-DQA2|MFSD6|HLA-DQB2|PIKFYVE|FCGR1A|HLA-DRA|HLA-DRB4|HLA-DRB5|HLA-F|HLA-G|HLA-H|FCER1G|HLA-E|SAR1B|FCGR2B|…	72	GOBP_ANTIGEN_PROCESSING_AND_PRESENTATION_OF_PEPTIDE_ANTIGEN	-2.1835	0	GOBP_ANTIGEN_PROCESSING_AND_PRESENTATION_OF_PEPTIDE_ANTIGEN	ANTIGEN PROCESSING AND PRESENTATION OF PEPTIDE ANTIGEN
Antigen Presentation & Cytotoxic Immunity	4	-4	-0.5265	0	HLA-A|HLA-DPB1|HLA-DQB1|HLA-DRB1|HLA-DRB3|IDE|IGHE|IKBKB|TRAF6|TREM2|TREX1|RAB3B|UNC93B1|AP3B1|CALR|ARL8B|THBS1|AP3D1|CCL21|ATG5|CCR7|ULBP1|ULBP2|ULBP3|ABCB9|AZGP1|B2M|CCL19|KDM5D|CD1A|CD1B|CD1C|CD1D|CD1E|CD209|NOD1|NOD2|CD74|LILRB2|WDFY4|CD8A|CLEC4A|MARCHF8|CLEC4M|MPEG1|FAM3D|MR1|CTSH|CTSL|GBA1|ERAP1|ERAP2|PDIA3|DNM2|CTSS|CD68|CST7|HFE|RAB27A|CTSD|HLA-B|LNPEP|RAET1E|CTSE|HLA-C|RAET1G|CTSF|HLA-DM…	120	GOBP_ANTIGEN_PROCESSING_AND_PRESENTATION	-2.2392	0	GOBP_ANTIGEN_PROCESSING_AND_PRESENTATION	ANTIGEN PROCESSING AND PRESENTATION
Antigen Presentation & Cytotoxic Immunity	4	-4	-0.3285	0	CDH17|SPN|STAT3|TFRC|TNFSF4|SNX6|DHX36|TCIM|RC3H1|ZC3H12A|TMBIM6|SRC|ARID5A|SPI1|SWAP70|MAPKAPK2|MYD88|FOXF1|TGFB1|TGFB2|TGFB3|GATA1|MDK|LAMP1|NECTIN4|GPI|RORA|SEMA6D|SEMA7A|SIRT1|XBP1|GRN|ARL8B|CD27|CD70|EBAG9|TNFRSF14|ADAM17|TWIST1|NCF1|WNT5A|AHR|PCYOX1L|AICDA|AIRE|TSC1|KIF5B|APLF|ASCL2|TYROBP|ATAD5|AZGP1|B2M|BATF|BCL3|BRD2|KLK5|BRD4|C17ORF99|CAMK4|CARD9|CCL19|CCR2|CCR6|CD1A|WDR1|CD1B|CD1C|CD1D…	745	GOBP_IMMUNE_EFFECTOR_PROCESS	-1.7081	0	GOBP_IMMUNE_EFFECTOR_PROCESS	IMMUNE EFFECTOR PROCESS
Antigen Presentation & Cytotoxic Immunity	2.40894	-2.40894	-0.3309	0.0376	SNX4|HAVCR2|SPN|HLA-A|TFRC|HLA-DRB1|TNFSF4|HLA-DRB3|HSPD1|IL1B|DHX36|ITGB2|INPP5D|ITGAM|ARID5A|KLRC1|KLRC2|KLRC3|KLRC4|KLRC4-KLRK1|KLRD1|SPI1|KLRK1|FOXF1|BCL6|BCR|TGFB1|FERRY3|GAB2|GATA1|LYN|BST2|LAMP1|MALT1|MAP3K7|NECTIN4|MAVS|AHR|UFL1|ULBP1|APLF|ULBP2|ULBP3|TYROBP|UNC13D|ATAD5|AZGP1|USP5|B2M|NCR3|XCL1|YWHAG|ZBTB1|C17ORF99|CAMK4|CCR2|CD1A|CD1B|CD1C|NLRP3|CD1D|CD1E|NOD2|CD177|CD40|NOS2|CD7|CD80|C…	263	GOBP_REGULATION_OF_LEUKOCYTE_MEDIATED_IMMUNITY	-1.5303	0.0039	GOBP_REGULATION_OF_LEUKOCYTE_MEDIATED_IMMUNITY	REGULATION OF LEUKOCYTE MEDIATED IMMUNITY
Antigen Presentation & Cytotoxic Immunity	4	-4	-0.5232	0.0008	HMGB1|SPN|HLA-A|HLA-DRB1|IL12B|TNFSF4|HLA-DRB3|IL12RB1|IL18|IL23A|IL23R|HSPD1|LILRB4|ZP3|RIPK3|SLAMF1|IL1B|NECTIN2|TRAF6|ARID5A|KLRC1|KLRD1|MALT1|MAP3K7|IL12A|AHR|IL18R1|UFL1|IL1R1|ULBP1|ULBP2|NCKAP1L|ULBP3|AZGP1|USP5|B2M|IL4|XCL1|IL4I1|YWHAG|ZBTB1|IL7R|CCR2|KLHL22|CD1A|CD1B|CD1C|NLRP3|CD1D|CD1E|CD55|CD7|LILRB1|CD80|CD81|CEACAM1|MAPK3|CLEC4G|MR1|CYRIB|SMAD7|PDCD1|FBXO38|P2RX7|PPP3CB|PRKAA1|FZD5|P…	107	GOBP_REGULATION_OF_T_CELL_MEDIATED_IMMUNITY	-2.0754	0	GOBP_REGULATION_OF_T_CELL_MEDIATED_IMMUNITY	REGULATION OF T CELL MEDIATED IMMUNITY
Antigen Presentation & Cytotoxic Immunity	4	-4	-0.7342	0.0001	AZGP1|B2M|KLRD1|XCL1|PTPRC|HLA-A|IL7R|PVR|HLA-B|HLA-DRB1|IL12B|RAET1E|HLA-C|IL12RB1|RAET1G|RAET1L|IL23A|IL23R|CD1A|CD1B|CD1C|CD1D|HLA-DRA|CD1E|HLA-F|HLA-G|HLA-H|RIPK3|LILRB1|HLA-E|FCGR2B|CEACAM1|SLC22A13|MR1|NECTIN2|STX7|TAP2|CYRIB|AGER|IL12A|P2RX7|ULBP1|FADD|KLRC1|ULBP2|NCKAP1L|PPP3CB|ULBP3	48	GOBP_REGULATION_OF_T_CELL_MEDIATED_CYTOTOXICITY	-2.3661	0	GOBP_REGULATION_OF_T_CELL_MEDIATED_CYTOTOXICITY	REGULATION OF T CELL MEDIATED CYTOTOXICITY
Antigen Presentation & Cytotoxic Immunity	4	-4	-0.8259	0	AZGP1|B2M|HLA-A|AP3B1|HLA-B|RAET1E|HLA-C|RAET1G|RAET1L|TAP2|CD1A|CD1B|AP3D1|CD1C|CD1D|CD1E|HLA-F|HLA-G|HLA-H|HLA-E|ULBP1|ULBP2|ULBP3	23	GOBP_ANTIGEN_PROCESSING_AND_PRESENTATION_VIA_MHC_CLASS_IB	-2.3808	0	GOBP_ANTIGEN_PROCESSING_AND_PRESENTATION_VIA_MHC_CLASS_IB	ANTIGEN PROCESSING AND PRESENTATION VIA MHC CLASS IB
Antigen Presentation & Cytotoxic Immunity	2.74473	-2.74473	-0.3728	0.0213	HAVCR2|SPN|HLA-A|TFRC|HLA-DRB1|TNFSF4|HLA-DRB3|HSPD1|IL1B|INPP5D|ARID5A|KLRC1|KLRC2|KLRC3|KLRC4|KLRC4-KLRK1|KLRD1|KLRK1|BCL6|TGFB1|LAMP1|MALT1|MAP3K7|NECTIN4|AHR|UFL1|ULBP1|APLF|ULBP2|ULBP3|ATAD5|AZGP1|USP5|B2M|NCR3|XCL1|YWHAG|ZBTB1|C17ORF99|CCR2|CD1A|CD1B|CD1C|NLRP3|CD1D|CD1E|CD40|CD7|CD80|CD96|CRK|CLCF1|CLEC4G|CLEC12B|CLNK|CYRIB|EXOSC3|EXOSC6|FBXO38|P2RX7|RASGRP4|FZD5|PTPN6|PTPRC|HFE|TNF|HLA-B|…	202	GOBP_REGULATION_OF_LYMPHOCYTE_MEDIATED_IMMUNITY	-1.6658	0.0018	GOBP_REGULATION_OF_LYMPHOCYTE_MEDIATED_IMMUNITY	GOBP_POSITIVE_REGULATION_OF_T_CELL_MEDIATED_CYTOTOXICITY
Antigen Presentation & Cytotoxic Immunity	4	-4	-0.7841	0	AZGP1|B2M|XCL1|PTPRC|HLA-A|PVR|HLA-B|HLA-DRB1|IL12B|RAET1E|HLA-C|IL12RB1|RAET1G|RAET1L|IL23A|IL23R|CD1A|CD1B|CD1C|CD1D|HLA-DRA|CD1E|HLA-F|HLA-G|HLA-H|HLA-E|SLC22A13|MR1|NECTIN2|STX7|TAP2|CYRIB|IL12A|P2RX7|ULBP1|FADD|ULBP2|ULBP3	38	GOBP_POSITIVE_REGULATION_OF_T_CELL_MEDIATED_CYTOTOXICITY	-2.4338	0	GOBP_POSITIVE_REGULATION_OF_T_CELL_MEDIATED_CYTOTOXICITY	PEPTIDE ANTIGEN ASSEMBLY WITH MHC PROTEIN COMPLEX
Antigen Presentation & Cytotoxic Immunity	3.52288	-3.52288	-0.7107	0.0055	CALR|B2M|HLA-A|HLA-DPB1|HLA-DQB1|HLA-DRB1|HLA-DRB3|HLA-DMA|HLA-DMB|HLA-DOA|HLA-DOB|HLA-DPA1|HLA-DQA1|HLA-DQA2|HLA-DQB2|HLA-DRA|HLA-DRB4|HLA-DRB5|PDIA3|TAPBP|TAPBPL	21	GOBP_PEPTIDE_ANTIGEN_ASSEMBLY_WITH_MHC_PROTEIN_COMPLEX	-2.0486	0.0003	GOBP_PEPTIDE_ANTIGEN_ASSEMBLY_WITH_MHC_PROTEIN_COMPLEX	T CELL CHEMOTAXIS
Antigen Presentation & Cytotoxic Immunity	4	-4	-0.5572	0.0013	AZGP1|B2M|IL4|XCL1|YWHAG|ZBTB1|HLA-A|HLA-DRB1|IL12B|TNFSF4|HLA-DRB3|IL12RB1|IL18|IL23A|IL23R|KLHL22|CD1A|HSPD1|CD1B|CD1C|NLRP3|CD1D|CD1E|ZP3|CD55|CD7|SLAMF1|CD81|IL1B|MR1|NECTIN2|TRAF6|CYRIB|ARID5A|FBXO38|P2RX7|PRKAA1|FZD5|PRKCZ|PTPRC|PVR|DENND1B|HLA-B|RAET1E|HLA-C|RAET1G|RAET1L|HLA-DRA|HLA-F|HLA-G|HLA-H|SASH3|SECTM1|HLA-E|MALT1|MAP3K7|RSAD2|IL6|SLC22A13|STX7|TAP2|TBX21|GATA3|IL12A|IL18R1|IL1R1|T…	72	GOBP_POSITIVE_REGULATION_OF_T_CELL_MEDIATED_IMMUNITY	-2.055	0.0001	GOBP_POSITIVE_REGULATION_OF_T_CELL_MEDIATED_IMMUNITY	GOBP_COMPLEMENT_ACTIVATION
Antigen Presentation & Cytotoxic Immunity	4	-4	-0.5755	0.0003	STAP1|HAVCR2|HLA-A|HLA-DRB1|IL12B|IL12RB1|GRB2|IL23A|IL23R|LGALS9|RIPK3|STAT5A|STAT5B|KIR2DL4|KLRB1|INPP5D|NECTIN2|ITGAM|RASGRP1|KLRC1|KLRC2|KLRC3|KLRC4|KLRC4-KLRK1|KLRD1|SPI1|KLRK1|VAV1|ARRB2|PIK3R6|TGFB1|TGFB2|NCR1|LAMP1|NECTIN4|MAPK8|IL10|IL12A|LEP|IL18RAP|ULBP1|IL21|ULBP2|NCKAP1L|ULBP3|TYROBP|AZGP1|B2M|IL4|NCR3|XCL1|AP1G1|IL7R|CD160|CD226|CD1A|CD1B|CD1C|LAG3|POMC|CD1D|CD1E|CD55|CD59|CD5L|NOS2…	113	GOBP_REGULATION_OF_CELL_KILLING	-2.1583	0	GOBP_REGULATION_OF_CELL_KILLING	GOBP_POSITIVE_REGULATION_OF_NATURAL_KILLER_CELL_ACTIVATION
Antigen Presentation & Cytotoxic Immunity	2.29243	-2.29243	-0.3685	0.0453	STAP1|HLA-A|TFRC|HLA-DRB1|IL12B|TNFSF4|HLA-DRB3|IL12RB1|IL18|IL2|IL23A|IL23R|HSPD1|TICAM1|ZP3|SLAMF1|STAT5A|STAT5B|KIR2DL4|IL1B|DHX36|ITGB2|NECTIN2|TRAF6|TREM2|KIT|ITGAM|ARID5A|RASGRP1|KLRC1|KLRC2|KLRC3|KLRC4|KLRC4-KLRK1|KLRD1|SPI1|KLRK1|MAD2L2|VAV1|TGFB1|BTK|LAMP1|MALT1|MAP3K7|MAVS|C3|IL12A|IL18R1|IL18RAP|IL1R1|ULBP1|IL21|ULBP2|ULBP3|TYROBP|ATAD5|AZGP1|B2M|IL4|NCR3|XCL1|AP1G1|YWHAG|ZBTB1|CD160|C…	157	GOBP_POSITIVE_REGULATION_OF_LEUKOCYTE_MEDIATED_IMMUNITY	-1.5957	0.0051	GOBP_POSITIVE_REGULATION_OF_LEUKOCYTE_MEDIATED_IMMUNITY	GOBP_REGULATION_OF_NUCLEAR_TRANSCRIBED_MRNA_POLY_A_TAIL_SHORTENING
Antigen Presentation & Cytotoxic Immunity	4	-4	-0.3783	0.0001	SPN|STAT3|TFRC|TNFSF4|RC3H1|ZC3H12A|ARID5A|SWAP70|MYD88|TGFB1|RORA|CD27|CD70|EBAG9|ADAM17|AHR|AICDA|AIRE|APLF|ASCL2|ATAD5|AZGP1|B2M|BACH2|BATF|BCL3|BRD2|BRD4|C17ORF99|CARD9|CCL19|CCR2|CCR6|CD1A|CD1B|CD1C|CD1D|CD1E|CD4|CD40|CD40LG|CD69|CD7|CD74|CD80|CLCF1|CLEC4G|CSF2RB|CTSC|CTSH|CXCL13|EBI3|ENTPD7|EPHB2|ERCC1|EXO1|EXOSC3|EXOSC6|FBXO38|P2RX7|FCRLB|FZD5|GFUS|GNL1|GZMM|HFE|TNF|HLA-B|HLA-C|HLA-DRA|HLA…	390	GOBP_ADAPTIVE_IMMUNE_RESPONSE_BASED_ON_SOMATIC_RECOMBINATION_OF_IMMUNE_RECEPTORS_BUILT_FROM_IMMUNOGLOBULIN_SUPERFAMILY_DOMAINS	-1.8428	0	GOBP_ADAPTIVE_IMMUNE_RESPONSE_BASED_ON_SOMATIC_RECOMBINATION_OF_IMMUNE_RECEPTORS_BUILT_FROM_IMMUNOGLOBULIN_SUPERFAMILY_DOMAINS	GOBP_INFLAMMATORY_CELL_APOPTOTIC_PROCESS
Antigen Presentation & Cytotoxic Immunity	4	-4	-0.3835	0.0004	HAVCR2|SPN|HLA-A|TFRC|HLA-DRB1|TNFSF4|HLA-DRB3|TUBB|TUBB4B|HSPD1|IGHA1|IGHA2|IGHD|IGHE|VAMP2|IGHG1|IGHG2|IGHG3|IGHG4|IGKC|IGLC1|IGLC3|IGLC6|IGLC7|IL1B|CD2|INPP5D|IRF7|ARID5A|KLRC1|KLRC2|KLRC3|KLRC4|KLRC4-KLRK1|KLRD1|KLRK1|SWAP70|MYD88|BCL6|TGFB1|LAMP1|MALT1|MAP3K7|NECTIN4|MASP2|MBL2|ARL8B|CD27|CD70|EBAG9|AHR|AICDA|AIRE|KIF5B|UFL1|ULBP1|APLF|ULBP2|ULBP3|TYROBP|UNC13D|ATAD5|UNG|AZGP1|USP5|B2M|NCR3|…	377	GOBP_LYMPHOCYTE_MEDIATED_IMMUNITY	-1.8226	0	GOBP_LYMPHOCYTE_MEDIATED_IMMUNITY	LYMPHOCYTE MEDIATED IMMUNITY
Antigen Presentation & Cytotoxic Immunity	4	-4	-0.7076	0	AZGP1|B2M|XCL1|HLA-A|IL7R|EMP2|HLA-DRB1|IL12B|IL12RB1|IL23A|IL23R|CD1A|CD1B|CD1C|CD1D|CD1E|RIPK3|LILRB1|CEACAM1|MICA|MR1|NECTIN2|CTSC|CTSH|CYRIB|P2RX7|KLRC1|PPP3CB|PRF1|KLRD1|GFUS|PTPRC|GZMM|PVR|RAB27A|HLA-B|RAET1E|HLA-C|RAET1G|RAET1L|HLA-DRA|HLA-F|HLA-G|HLA-H|HPRT1|HLA-E|FCGR2B|SLC22A13|STX7|TAP2|AGER|EBAG9|IL12A|CADM1|CRTAM|ULBP1|FADD|ULBP2|NCKAP1L|ULBP3	60	GOBP_T_CELL_MEDIATED_CYTOTOXICITY	-2.4249	0	GOBP_T_CELL_MEDIATED_CYTOTOXICITY	T CELL MEDIATED CYTOTOXICITY
Antigen Presentation & Cytotoxic Immunity	2.67778	-2.67778	-0.5123	0.0237	B2M|HLA-A|HLA-DPB1|HLA-DQB1|HLA-DRB1|HLA-DRB3|CD1A|CD1B|CD1C|CD1D|CD1E|CD74|CLEC4A|IKBKB|MPEG1|MR1|CTSL|TRAF6|DNM2|CTSS|UNC93B1|AP3B1|CTSD|LNPEP|CTSE|CTSF|HLA-DMA|CTSV|HLA-DMB|HLA-DOA|HLA-DOB|IFI30|HLA-DPA1|LGMN|HLA-DQA1|HLA-DQA2|MFSD6|HLA-DQB2|PIKFYVE|FCGR1A|HLA-DRA|HLA-DRB4|PSME1|HLA-DRB5|HLA-F|FCER1G|HLA-E|FCGR2B|TAP2|AP3D1	50	GOBP_ANTIGEN_PROCESSING_AND_PRESENTATION_OF_EXOGENOUS_ANTIGEN	-1.8215	0.0021	GOBP_ANTIGEN_PROCESSING_AND_PRESENTATION_OF_EXOGENOUS_ANTIGEN	ANTIGEN PROCESSING AND PRESENTATION OF EXOGENOUS ANTIGEN
Antigen Presentation & Cytotoxic Immunity	4	-4	-0.5413	0	HAVCR2|TOR2A|HLA-A|HLA-DRB1|TUBB|TUBB4B|IGHE|VAMP2|IGHG1|CD2|INPP5D|APOL1|ITGAM|KLRC1|KLRC2|KLRC3|KLRC4|KLRC4-KLRK1|KLRD1|SPI1|KLRK1|MYD88|TAC1|LGALS3|TGFB1|TGFB2|LTF|LAMP1|NECTIN4|MAPK8|MBL2|ARL8B|MICB|TREM1|CCL11|CCL21|EBAG9|GSDMB|NCF1|PCYOX1L|KIF5B|SEMG1|ULBP1|ULBP2|ULBP3|TYROBP|UNC13D|AZGP1|B2M|NCR3|XCL1|NINJ1|CCL19|CD1A|DEFA1|CD1B|DEFA1B|HTN1|TUSC2|CD1C|DEFA3|CD1D|DEFA4|NLRP6|CD1E|DEFA5|DEFA…	268	GOBP_CELL_KILLING	-2.4128	0	GOBP_CELL_KILLING	CELL KILLING
Antigen Presentation & Cytotoxic Immunity	3.22185	-3.22185	-0.6227	0.0096	HAVCR2|NCR3|AP1G1|HLA-A|CD160|IL12B|CD226|GRB2|LGALS9|LAG3|LILRB1|STAT5A|STAT5B|CD96|CRK|CEACAM1|KIR2DL4|KLRB1|MICA|INPP5D|NECTIN2|CLEC12B|CLNK|SERPINB4|RASGRP1|RASGRP4|KLRC1|KLRC2|KLRC3|KLRC4|KLRC4-KLRK1|CALHM6|KLRD1|KLRK1|PVR|HLA-B|RAET1E|RAET1G|VAV1|ARRB2|TIGIT|HLA-F|PIK3R6|TGFB1|HLA-G|NCR1|SH2D1B|HLA-E|LAMP1|NECTIN4|SLAMF6|SH2D1A|SERPINB9|IL12A|CADM1|LEP|CRTAM|IL18RAP|IL21	59	GOBP_REGULATION_OF_NATURAL_KILLER_CELL_MEDIATED_IMMUNITY	-2.0068	0.0006	GOBP_REGULATION_OF_NATURAL_KILLER_CELL_MEDIATED_IMMUNITY	REGULATION OF NATURAL KILLER CELL MEDIATED IMMUNITY
Antigen Presentation & Cytotoxic Immunity	4	-4	-0.7523	0	AZGP1|B2M|HLA-A|HFE|HLA-B|HLA-DRB1|RAET1E|HLA-C|RAET1G|RAET1L|IDE|CD1A|CD1B|CD1C|CD1D|HLA-DRA|CD1E|HLA-F|HLA-G|HLA-H|CD74|HLA-E|TAPBP|TAP1|TAP2|ATG5|ERAP1|ERAP2|ULBP1|ULBP2|ULBP3	31	GOBP_ANTIGEN_PROCESSING_AND_PRESENTATION_OF_ENDOGENOUS_ANTIGEN	-2.4247	0	GOBP_ANTIGEN_PROCESSING_AND_PRESENTATION_OF_ENDOGENOUS_ANTIGEN	ANTIGEN PROCESSING AND PRESENTATION OF ENDOGENOUS ANTIGEN
Antigen Presentation & Cytotoxic Immunity	4	-4	-0.3759	0	SPN|STAT3|TFRC|TNFRSF11A|TNFSF4|RC3H1|ZC3H12A|ARID5A|SWAP70|MYD88|TGFB1|RORA|SIRT1|CD27|CD70|TRIM27|EBAG9|TNFRSF14|ADAM17|ADCY7|ADGRE1|AHR|AICDA|AIRE|TSC1|AKIRIN2|ALCAM|APLF|ARG2|ASCL2|ATAD5|AZGP1|B2M|BACH2|BATF|BCL3|BRD2|BRD4|BTLA|C17ORF99|CAMK4|CARD9|CCL19|CCR2|CCR6|CD1A|CD1B|CD1C|CD1D|CD1E|CD209|CD244|CD4|CD40|CD40LG|CD69|CD7|CD74|CD80|CD84|CD86|CD8B2|CLCF1|CLEC10A|CLEC4A|CLEC4C|CLEC4D|CLEC4G|…	765	GOBP_ADAPTIVE_IMMUNE_RESPONSE	-1.8924	0	GOBP_ADAPTIVE_IMMUNE_RESPONSE	ADAPTIVE IMMUNE RESPONSE
Antigen Presentation & Cytotoxic Immunity	4	-4	-0.3689	0.0001	SPN|TFRC|TNFSF4|DHX36|RC3H1|ZC3H12A|TMBIM6|ARID5A|SPI1|MAPKAPK2|MYD88|FOXF1|TGFB1|TGFB2|TGFB3|GATA1|LAMP1|NECTIN4|GPI|SEMA7A|SIRT1|XBP1|GRN|TNFRSF14|TWIST1|NCF1|WNT5A|AHR|APLF|ASCL2|TYROBP|ATAD5|AZGP1|B2M|BATF|BRD2|KLK5|BRD4|C17ORF99|CAMK4|CARD9|CCL19|CCR2|CD1A|CD1B|CD1C|CD1D|CD1E|CD244|EVPL|CD177|CD40|CD40LG|CD69|CD7|CD74|CD80|HTR2A|CD37|CD84|CD86|CD96|CLCF1|KLK7|CD36|PGC|CLEC4G|CLEC12B|CLNK|CX3…	421	GOBP_REGULATION_OF_IMMUNE_EFFECTOR_PROCESS	-1.8302	0	GOBP_REGULATION_OF_IMMUNE_EFFECTOR_PROCESS	REGULATION OF IMMUNE EFFECTOR PROCESS
Antigen Presentation & Cytotoxic Immunity	4	-4	-0.5424	0	HMGB1|SPN|HLA-A|HLA-DRB1|IL12B|TNFSF4|HLA-DRB3|IL12RB1|IL18|IL23A|IL23R|HSPD1|LILRB4|ZP3|RIPK3|SLAMF1|IL1B|NECTIN2|TRAF6|TREX1|ARID5A|KLRC1|KLRD1|UNC93B1|MALT1|BTN3A2|MAP3K7|BTN3A3|CD70|EBAG9|C4BPA|IL12A|AHR|AIRE|IL18R1|UFL1|IL1R1|ULBP1|ULBP2|NCKAP1L|ULBP3|AZGP1|USP5|B2M|IL4|XCL1|IL4I1|YWHAG|ZBTB1|IL7R|EMP2|JAG1|NFKBIZ|CCR2|KDM5D|KLHL22|CD1A|CD1B|CD1C|NLRP3|CD1D|CD1E|CD46|CD55|CD7|LILRB1|CD80|CD8…	139	GOBP_T_CELL_MEDIATED_IMMUNITY	-2.2943	0	GOBP_T_CELL_MEDIATED_IMMUNITY	T CELL MEDIATED IMMUNITY
Antimicrobial Humoral Immune Response	4	-4	-0.761	0	GNLY|HAMP|TOR2A|HMGN2|HTN3|HLA-A|KNG1|KRT6A|LEAP2|MUC7|PGLYRP1|NTS|PF4V1|PGLYRP3|PGLYRP4|PPBP|REG1A|REG1B|ROMO1|RPL30|RPS19|S100A12|SPAG11B|TSLP|HRG|IGHA1|XCL2|AZU1|IGHA2|CST9|IGHD|CST9L|IGHE|ANG|CST9LP1|IGHG1|BPIFA1|IGHG2|LYZ|IGHG3|PPP2R3C|IGHG4|PRSS2|IGHM|PRSS3|PRTN3|CALCA|NPPB|IGKV3-20|CAMP|ACOD1|DEFB1|APP|TAC1|LGALS3|ADM|CXCL10|CXCL11|CXCL9|LTF|GATA6|SPINK5|CCL11|CCL21|CCL24|CCL26|IL17A|IL17F…	184	GOBP_ANTIMICROBIAL_HUMORAL_RESPONSE	-2.7316	0	GOBP_ANTIMICROBIAL_HUMORAL_RESPONSE	ANTIMICROBIAL HUMORAL RESPONSE
Antimicrobial Humoral Immune Response	4	-4	-0.6277	0.0002	GNLY|HAMP|TOR2A|HMGN2|HTN3|KNG1|KRT6A|MUC7|PGLYRP1|NTS|PGLYRP3|PGLYRP4|PPBP|ROMO1|RPL30|RPS19|S100A12|SPAG11B|HRG|AZU1|USP7|LYZ|CHGA|LCE3A|LCE3B|LCE3C|APOL1|LYZL6|NPPB|CAMP|MYD88|TAC1|LGALS3|CXCL10|CXCL11|CXCL9|LTF|MBL2|MICB|PI4KA|TREM1|CCL11|CCL21|C5|CSNK2A1|GSDMB|NCF1|PCYOX1L|C6|C7|C8A|SEMG1|C8B|C8G|C9|XCL1|DAO|NINJ1|NKG7|CCL19|DEFA1|DEFA1B|HTN1|PF4|TUSC2|DEFA3|POMC|DEFA4|NLRP6|CSNK2B|DEFA5|DEF…	125	GOBP_DISRUPTION_OF_ANATOMICAL_STRUCTURE_IN_ANOTHER_ORGANISM	-2.2317	0	GOBP_DISRUPTION_OF_ANATOMICAL_STRUCTURE_IN_ANOTHER_ORGANISM	DISRUPTION OF ANATOMICAL STRUCTURE IN ANOTHER ORGANISM
Antimicrobial Humoral Immune Response	2.67778	-2.67778	-0.6188	0.024	SUSD4|IGHA1|IGHA2|CD46|IGHD|CD55|IGHE|CD59|IGHG1|CD5L|IGHG2|IGHG3|IGHG4|CFB|CFD|CFH|CFHR1|CFHR2|IL1B|CFHR3|CFHR4|CFHR5|PHB1|CFI|PHB2|CFP|TREM2|CLU|COLEC10|COLEC11|CR1|CR1L|CR2|A2M|KRT1|VSIG4|FCN1|FCN2|FCN3|MASP1|MASP2|C1QA|C1QB|C1QBP|MBL2|C1QC|SERPING1|C1R|C1RL|C1S|C2|C3|C4A|C4B|C4BPA|C4BPB|C5|C6|MIR520B|C7|MIR520E|C8A|C8B|C8G|C9	65	GOBP_COMPLEMENT_ACTIVATION	-1.8829	0.0021	GOBP_COMPLEMENT_ACTIVATION	COMPLEMENT ACTIVATION
Antimicrobial Humoral Immune Response	4	-4	-0.6006	0	TOR2A|HLA-A|HLA-DQB1|HLA-DRB1|IFNG|IGHA1|IGHA2|IGHD|IGHE|ANG|IGHG1|BPIFA1|IGHG2|IGHG3|IGHG4|IGHM|IL1B|DEFB1|KRT1|TAC1|LGALS3|BCL2|LTF|BST1|GATA6|GPI|MASP1|MASP2|MBL2|MEF2C|TREM1|CCL11|CCL21|CCL24|CCL26|CCR7|PSMB10|MIR520B|AIRE|MIR520E|SEMG1|SEMG2|MS4A1|B2M|XCL1|BCL3|KLK5|CCL19|CCR2|BPI|CCR6|DEFA1|DEFA1B|HTN1|DEFA3|DEFA4|DEFA5|DEFA6|DMBT1|EVPL|YTHDF2|FAU|H2BC10|H2BC11|H2BC12|H2BC12L|H2BC21|CD37|H2…	307	GOBP_HUMORAL_IMMUNE_RESPONSE	-2.5706	0	GOBP_HUMORAL_IMMUNE_RESPONSE	GOBP_POSITIVE_REGULATION_OF_NATURAL_KILLER_CELL_ACTIVATION
Antimicrobial Humoral Immune Response	4	-4	-0.7724	0	GNLY|HAMP|TOR2A|HMGN2|HTN3|KNG1|KRT6A|LEAP2|MUC7|PGLYRP1|NTS|PF4V1|PGLYRP3|PGLYRP4|PPBP|REG1A|REG1B|ROMO1|RPL30|RPS19|S100A12|SPAG11B|TSLP|HRG|XCL2|ANG|BPIFA1|CALCA|NPPB|CAMP|DEFB1|APP|TAC1|LGALS3|ADM|CXCL10|CXCL11|CXCL9|LTF|SPINK5|CCL11|CCL21|CCL24|CCL26|IL17A|IL17F|SEMG1|B2M|XCL1|KLK5|CCL19|BPI|DEFA1|DEFA1B|HTN1|PF4|DEFA3|POMC|DEFA4|DEFA5|S100A7|CCL5|DEFA6|DMBT1|EVPL|FAU|H2BC10|H2BC11|H2BC12|H2…	134	GOBP_ANTIMICROBIAL_HUMORAL_IMMUNE_RESPONSE_MEDIATED_BY_ANTIMICROBIAL_PEPTIDE	-2.6224	0	GOBP_ANTIMICROBIAL_HUMORAL_IMMUNE_RESPONSE_MEDIATED_BY_ANTIMICROBIAL_PEPTIDE	GOBP_REGULATION_OF_NUCLEAR_TRANSCRIBED_MRNA_POLY_A_TAIL_SHORTENING
Arachidonic & Monocarboxylic Acid Metabolism	2.76955	-2.76955	-0.5924	0.0203	ABHD6|ALOX5|ALOX12B|ALOXE3|GPX1|ALOX15|CYP1A1|PLA2G4A|CYP1A2|CYP1B1|CYP2C18|CYP2C8|CYP2C9|GPX4|CYP2D6|ALOX12|ALOX15B|AWAT1|CYP2A13|CYP2A6|PLA2G10|CYP2A7|CYP2B6|CYP2C19|CYP2E1|CYP2F1|CYP2J2|CYP2S1|CYP2U1|CYP4A11|CYP4A22|CYP4F11|CYP4F12|CYP4F2|CYP4F3|CYP4F8|CYP4Z1|DAGLA|DAGLB|EPHX1|FAAH|FAAH2|MGLL|MGST3|PNPLA8|PLA2G2F|PLA2G4B|PLA2G4C|PTGS1|ABHD12|CTHRC1|PTGS2	52	GOBP_ARACHIDONATE_METABOLIC_PROCESS	-1.8762	0.0017	GOBP_ARACHIDONATE_METABOLIC_PROCESS	ARACHIDONATE METABOLIC PROCESS
Arachidonic & Monocarboxylic Acid Metabolism	2.23657	-2.23657	-0.2499	0.0492	AASDHPPT|ALDH1L2|CYGB|STAT3|MTHFD1L|COL6A1|CYP4B1|VNN1|ABCD1|D2HGDH|ACOT1|DLD|ACOT11|ACOT2|ACOT4|ACOT6|ACOT7|IDH1|ACOT8|FGF19|IDH2|ACOT9|ACSBG1|ACSBG2|ACSF2|OGDH|ACSF3|EDN2|OGDHL|ACSL1|PHYH|ACSL3|ACSL4|ACSL5|HIF1A|ACSL6|ACSM1|ACSM2A|SLC27A1|ACSM2B|IRS2|ACSM3|ABCD3|ACSM4|ACSM5|ACSM6|NDUFAB1|BAAT|CBR4|ERRFI1|DGAT2|ELOVL1|SLC27A5|ELOVL2|ELOVL3|ELOVL4|ELOVL5|ELOVL6|ELOVL7|ENSG00000293349|ACOX2|AMACR|…	633	GOBP_MONOCARBOXYLIC_ACID_METABOLIC_PROCESS	-1.3231	0.0058	GOBP_MONOCARBOXYLIC_ACID_METABOLIC_PROCESS	MONOCARBOXYLIC ACID METABOLIC PROCESS
Cell Cycle Regulation & Chromosome Organization	3.22185	3.22185	0.5223	0.0093	IHO1|ANKRD31|EHMT2|TRIP13|SHOC1|MAEL|SMC2|SMC4|ZCWPW1|SPATA22|BRIP1|SPDYA|SPO11|SYCE3|FANCD2|STAG3|C14ORF39|C1ORF146|P3H4|ATRX|MLH1|SUN1|SYCE1|TEX11|KASH5|SYCE1L|ATM|SYCE2|SYCP1|PRDM9|CCNE1|CCNE2|MAJIN|AGO4|TERB1|MRE11|TERB2|TERF1|PSMC3IP|TEX12|TEX15|DMC1|CCNB1IP1|MCMDC2|HORMAD1|MEI4|BAG6|MEIOB|MEIOC|RAD50|RAD51|SIRT7|MLH3|MND1|MSH4|MSH5|UBE2B|RNF212|RNF212B|NCAPH2|REC8|SYCP2|NCAPD2|NCAPD3|NCAPH|…	66	GOBP_CHROMOSOME_ORGANIZATION_INVOLVED_IN_MEIOTIC_CELL_CYCLE	1.9257	0.0006	GOBP_CHROMOSOME_ORGANIZATION_INVOLVED_IN_MEIOTIC_CELL_CYCLE	CHROMOSOME ORGANIZATION INVOLVED IN MEIOTIC CELL CYCLE
Cell Cycle Regulation & Chromosome Organization	3.69897	3.69897	0.3219	0.0044	NEK11|BUB1|BUB1B|NUBP1|DUSP1|E2F7|E2F8|ORC1|OVOL1|PABIR1|PDIK1L|ATF2|CCND1|EZH2|PINX1|TNKS|PKMYT1|CDK5RAP3|CDKN1A|CDKN2D|BRCA2|ZC3H12D|ZFP36L1|CHEK1|MIR15B|PPP2R5B|ZFP36L2|MIR16-1|CHEK2|MIR19B1|BRD7|CRY1|E2F1|PRP4K|TERF2|MAPK14|PTPN11|FBXO5|HORMAD1|FEM1B|RAD1|RAD17|FOXO4|CUL4A|TAOK1|TAOK2|RAD50|RAD51|BCL2|BCL6|DCUN1D3|PRPF19|RAD9B|RBBP8|LYN|RBL1|RBL2|MOS|TRIM39|RFWD3|RHNO1|GPNMB|NSUN2|RINT1|SIRT1…	317	GOBP_NEGATIVE_REGULATION_OF_CELL_CYCLE_PROCESS	1.5754	0.0002	GOBP_NEGATIVE_REGULATION_OF_CELL_CYCLE_PROCESS	NEGATIVE REGULATION OF CELL CYCLE PROCESS
Cell Cycle Regulation & Chromosome Organization	4	4	0.3722	0	ACTR2|ACTR3|BUB1|BUB1B|NSMCE2|VPS4B|NUDC|DUSP1|HSPA1A|HSPA1B|NUSAP1|SYCE3|MAPK15|ACTL6B|PHF13|PINX1|AURKA|TEX11|ARHGEF10|CHMP3|ARID1A|CHEK2|PRC1|ARID1B|BRD7|PRP4K|PSMC3IP|DMC1|PSRC1|PTTG1|PTTG2|PTTG3P|FBXO5|HORMAD1|RAB11A|TENT4A|RCC2|NCAPG2|PPP1CC|DDB1|LSM14A|SIRT7|RCC1|MOS|OFD1|RIOK2|RMI2|SIRT1|UBE2B|RNF212|RNF212B|NCAPH2|PPP2R1A|PRAP1|RAB24|DPF1|REC8|DPF2|PBRM1|RRS1|PHF10|KIF3B|KIF4A|CDC42|AKAP…	328	GOBP_NUCLEAR_CHROMOSOME_SEGREGATION	1.8423	0	GOBP_NUCLEAR_CHROMOSOME_SEGREGATION	NUCLEAR CHROMOSOME SEGREGATION
Cell Cycle Regulation & Chromosome Organization	2.82391	2.82391	0.5047	0.0187	PLK1|IHO1|ANKRD31|EHMT2|TRIP13|SHOC1|MAEL|ZCWPW1|ESPL1|SPATA22|BRIP1|SPDYA|SPO11|SYCE3|FANCD2|STAG3|C14ORF39|ZWINT|C1ORF146|P3H4|KNL1|MLH1|C9ORF78|SUN1|SYCE1|TEX11|KASH5|SYCE1L|ATM|SYCE2|SYCP1|PRDM9|CCNE1|CCNE2|MAJIN|AGO4|TERB1|MRE11|TERB2|TERF1|PSMC3IP|TEX12|TEX15|DMC1|PTTG1|CCNB1IP1|MCMDC2|PTTG2|PTTG3P|HORMAD1|MEI4|MEIKIN|BAG6|MEIOB|MEIOC|SIRT7|MLH3|MND1|MSH4|MSH5|UBE2B|RNF212|RNF212B|REC8|SYCP…	68	GOBP_HOMOLOGOUS_CHROMOSOME_SEGREGATION	1.8349	0.0015	GOBP_HOMOLOGOUS_CHROMOSOME_SEGREGATION	HOMOLOGOUS CHROMOSOME SEGREGATION
Cell Cycle Regulation & Chromosome Organization	2.88606	2.88606	0.4688	0.0163	MIS12|NDC80|NUF2|RMDN1|SEH1L|SKA1|SKA2|SKA3|ABRAXAS1|ABRAXAS2|AURKC|BUB3|DSN1|EML4|KNSTRN|KNTC1|NEK2|NSL1|APC|PMF1|SGO1|SPAG5|SPC24|SPC25|TEX14|ZNF207|ZW10|ZWILCH|KNL1|KAT2B|HNRNPU|ECT2|AURKB|RCC2|BECN1|RB1|RACGAP1|SIRT1|CCNB1|CDK1|SIRT2|RAB24|BOD1|CDCA8|CDT1|KAT5|CDC42|CENPC|BIRC5|CENPE|CHAMP1|INCENP|KIF2C|MAD1L1|MAPRE1	55	GOBP_ATTACHMENT_OF_SPINDLE_MICROTUBULES_TO_KINETOCHORE	1.8334	0.0013	GOBP_ATTACHMENT_OF_SPINDLE_MICROTUBULES_TO_KINETOCHORE	ATTACHMENT OF SPINDLE MICROTUBULES TO KINETOCHORE
Cell Cycle Regulation & Chromosome Organization	4	4	0.6207	0.0019	ESCO1|ESCO2|RAD21|BUB1|CHTF8|NSMCE2|MACROH2A1|SLF1|SLF2|CDCA5|SMC1A|SGO1|NIPBL|SMC3|STAG1|STAG2|PDS5A|RB1|PDS5B|ATRX|TNKS|HASPIN|POGZ|NAA10|DSCC1|NAA50|HDAC8|BOD1|SMC5|CDC20|MAU2	31	GOBP_MITOTIC_SISTER_CHROMATID_COHESION	2.1314	0.0001	GOBP_MITOTIC_SISTER_CHROMATID_COHESION	MITOTIC SISTER CHROMATID COHESION
Cell Cycle Regulation & Chromosome Organization	4	4	0.3536	0	DUSP1|SYCE3|CSNK2A2|TNKS|TEX11|ERCC2|PUM1|PUM2|MAPRE2|TOP1|CHEK2|MTCL2|RAB11A|TENT4A|RCC2|SIRT7|NR3C1|OFD1|SIRT1|UBE2B|ARL8A|ARL8B|PRAP1|KIF3B|KIF4A|AKAP8|VPS4A|AKAP8L|ANKRD31|ANKRD53|EHMT2|WASHC5|BAZ1B|BCCIP|BEX4|BRIP1|C14ORF39|C1ORF146|CEP192|CEP63|C9ORF78|CCDC61|CCDC66|CCDC69|KAT2B|CCNB2|PTEN|CCNE1|CCNE2|CCSAP|CDC6|CDCA2|CDCA5|CDK5RAP2|AAAS|CENATAC|CENPF|CENPH|CENPI|CENPK|CENPL|CCNB1|CENPM|CDK…	438	GOBP_CHROMOSOME_SEGREGATION	1.8152	0	GOBP_CHROMOSOME_SEGREGATION	CHROMOSOME SEGREGATION
Cell Cycle Regulation & Chromosome Organization	4	4	0.6099	0.0018	TDRKH|CYP26B1|ASZ1|SHCBP1L|TRIP13|MAEL|KCTD19|TEX14|BRDT|KIF18A|SPDYA|BTBD18|SPO11|ZNF541|ZSCAN21|MLH1|FANCA|DDX4|TEX11|ATM|DMRTC2|DNMT3L|SYCP3|FIGNL1|BRCA2|CCNA1|M1AP|TAF1L|TDRD12|TDRD9|AGO4|CATSPERZ|TESMIN|TEX15|UBR2|DMC1|TEX19|UBB|FOXJ2|SLC2A8|MEIKIN|MEIOB|MEIOC|SLC25A31|RAD51C|FOXJ3|MLH3|MOV10L1|ING2|MYBL1|RPL10L|REC8|SYCP2|HSF2BP|HSF5|RBM46|HSPA2	57	GOBP_MALE_MEIOTIC_NUCLEAR_DIVISION	2.1208	0.0001	GOBP_MALE_MEIOTIC_NUCLEAR_DIVISION	MALE MEIOTIC NUCLEAR DIVISION
Cell Cycle Regulation & Chromosome Organization	2.82391	2.82391	0.2745	0.018	EDN3|DUSP1|ACOT8|SYCE3|EPGN|TEX11|EREG|SPIRE1|SPIRE2|LRP5|CHEK2|PPARG|DAZL|UBB|FOXJ2|RAB11A|TENT4A|SLC25A31|TGFB1|CDKN1C|INSR|SIRT7|OFD1|SIRT1|UBE2B|PRAP1|WNT5A|KIF3B|KIF4A|AKAP8|VPS4A|AKAP8L|SPAST|ANKLE1|CRYZL2P-SEC16B|ANKRD31|ANKRD53|EHMT2|ASZ1|WASHC5|AURKAIP1|WNT4|BAZ1B|BCCIP|BORA|BRDT|BRIP1|BRME1|BROX|BTBD18|C14ORF39|C1ORF146|CEP192|C9ORF78|KDR|KIF20B|CCDC61|CCDC66|DRD3|CCDC8|CCNA1|CTDP1|KAT2…	510	GOBP_ORGANELLE_FISSION	1.4061	0.0015	GOBP_ORGANELLE_FISSION	ORGANELLE FISSION
Cell Cycle Regulation & Chromosome Organization	4	4	0.3371	0	CENPV|DUSP1|UCHL5|CIP2A|DCLRE1B|HSP90AB1|YY1|SYCE3|EID3|DHX36|HNRNPD|TNKS|TNKS2|TEX11|EXOSC10|HMGA2|PCNA|PUM2|TFPT|TOP1|UPF1|SRC|CHEK2|CCT2|CCT3|CCT4|CCT5|HNRNPC|CCT7|CCT8|PML|RAB11A|TCP1|TENT4A|KAT6A|TENT4B|H2BC1|SIRT7|MSH3|OFD1|SIRT1|UBE2B|NSMCE1|NSMCE4A|PRAP1|FSHR|KIF3B|KIF4A|HHEX|AKAP8|ACTR5|ACTR8|VPS4A|PRM3|AKAP8L|POT1|ANKRD31|ANKRD53|EHMT2|ATR|XPA|BAZ1B|BCCIP|BLM|RECQL4|RFC1|BRIP1|ZNF830|AC…	588	GOBP_CHROMOSOME_ORGANIZATION	1.7634	0	GOBP_CHROMOSOME_ORGANIZATION	CHROMOSOME ORGANIZATION
Cell Cycle Regulation & Chromosome Organization	2.58503	2.58503	0.6182	0.0279	HUS1|HUS1B|RAD9A|MDC1|TICRR|NAE1|TIPIN|CDC45|DONSON|RAD17|CDC6|CLSPN|TIMELESS|TOPBP1|CAMSAP3|ORC1|RAD9B|CDT1|DNA2|ZNF830	20	GOBP_DNA_REPLICATION_CHECKPOINT_SIGNALING	1.8645	0.0026	GOBP_DNA_REPLICATION_CHECKPOINT_SIGNALING	DNA REPLICATION CHECKPOINT SIGNALING
Cell Cycle Regulation & Chromosome Organization	4	4	0.5098	0.0004	CHFR|ACTR2|ACTR3|MAEL|ZCWPW1|DCAF13|SYCE3|FANCD2|MAPK15|ZWINT|KNL1|ASPM|AURKA|TEX11|GOLGA2|KASH5|MRE11|PSMC3IP|DMC1|PTTG1|PTTG2|PTTG3P|FBXO5|HORMAD1|BAG6|DDB1|SIRT7|MOS|UBE2B|RNF212|RNF212B|NCAPH2|PPP2R1A|REC8|CENPC|SEPTIN1|NDC80|NUF2|PLK1|IHO1|SKA1|SKA2|SKA3|ANKRD31|EHMT2|TRIP13|SHOC1|WASHC5|TUBB8|SGO1|SMC2|SMC4|ESPL1|SPATA22|BRIP1|SPDYA|SPO11|STAG3|C14ORF39|C1ORF146|P3H4|MLH1|C9ORF78|SUN1|SYCE1…	97	GOBP_MEIOTIC_CHROMOSOME_SEGREGATION	2.043	0	GOBP_MEIOTIC_CHROMOSOME_SEGREGATION	MEIOTIC CHROMOSOME SEGREGATION
Cell Cycle Regulation & Chromosome Organization	2.3098	2.3098	0.4395	0.044	NDC80|NUF2|PLK1|LCMT1|UBE2C|IK|SKA1|BUB1|BUB1B|NSMCE2|SKA3|BUB3|DUSP1|TRIP13|KLHL22|KNTC1|APC|XRCC3|SPC24|SPC25|TEX14|ZNF207|ESPL1|ZW10|SPDL1|ZWILCH|ZWINT|KNL1|CUL3|DIS3L2|DLGAP5|ATM|MAD2L1|DYNC1LI1|MAD2L1BP|USP44|PRP4K|PSMG2|MAD2L2|RAD21|FBXO5|AURKB|TPR|CDK5RAP2|GEN1|TTK|RB1|CENPF|CCNB1|HASPIN|NCAPH2|PPP2R1A|PRAP1|ANAPC11|ANAPC15|ANAPC5|CDCA8|ANAPC7|CDC16|BIRC5|CDC20|CDC23|INCENP|MAD1L1	64	GOBP_MITOTIC_SISTER_CHROMATID_SEPARATION	1.7535	0.0049	GOBP_MITOTIC_SISTER_CHROMATID_SEPARATION	MITOTIC SISTER CHROMATID SEPARATION
Cell Cycle Regulation & Chromosome Organization	2.25181	2.25181	0.5387	0.048	CCT3|CCT4|CCT6A|CCT5|CCT7|CCT8|POT1|CTNNB1|HSP90AA1|TCP1|ATR|DKC1|FBXO4|HNRNPA2B1|NAF1|PARN|DHX36|HNRNPD|TNKS|TNKS2|ATM|RTEL1|WRAP53|HNRNPA1|PTGES3|CCT2	26	GOBP_POSITIVE_REGULATION_OF_TELOMERE_MAINTENANCE_VIA_TELOMERE_LENGTHENING	1.7791	0.0056	GOBP_POSITIVE_REGULATION_OF_TELOMERE_MAINTENANCE_VIA_TELOMERE_LENGTHENING	POSITIVE REGULATION OF TELOMERE MAINTENANCE VIA TELOMERE LENGTHENING
Cell Cycle Regulation & Chromosome Organization	4	4	0.3755	0.0001	BUB1|BUB1B|NSMCE2|VPS4B|NUDC|DUSP1|HSPA1A|HSPA1B|NUSAP1|MAPK15|ACTL6B|PHF13|PINX1|ARHGEF10|CHMP3|ARID1A|CHEK2|PRC1|ARID1B|BRD7|PRP4K|PSRC1|FBXO5|RAB11A|TENT4A|NCAPG2|PPP1CC|LSM14A|RCC1|MOS|OFD1|RIOK2|RMI2|SIRT1|NCAPH2|PPP2R1A|PRAP1|DPF1|DPF2|PBRM1|RRS1|PHF10|KIF3B|KIF4A|AKAP8|SMARCA2|SMARCC2|SMARCD1|SMARCD2|VPS4A|SMARCE1|AKAP8L|ANKRD53|CLASP1|CLASP2|TRIP13|APC|SMC1A|BAZ1B|BCCIP|SMC2|SMC3|SMC4|ESP…	238	GOBP_SISTER_CHROMATID_SEGREGATION	1.8176	0	GOBP_SISTER_CHROMATID_SEGREGATION	SISTER CHROMATID SEGREGATION
Cell Cycle Regulation & Chromosome Organization	2.34679	2.34679	0.369	0.042	LCMT1|FGF8|IGF1|BTC|IGF2|BUB1|BUB1B|EDN3|NSMCE2|DUSP1|NUSAP1|XRCC3|CUL9|ZWINT|EPGN|IL1B|KNL1|AURKA|DLGAP5|EREG|PKMYT1|LRP5|DYNC1LI1|CHEK1|USP44|PRP4K|MAD2L2|FBXO5|HOXA13|AURKB|PIN1|FBXO43|FBXW5|NME6|INSR|RCC1|GEN1|NUP62|HASPIN|PRAP1|SMPD3|ANAPC11|ANAPC15|NFE2L1|CUL7|ANAPC5|CDCA8|ANAPC7|CAV2|CDC16|CDC42|CDC20|PHIP|CDC23|INCENP|MAD1L1|TOM1L1|NDC80|NUF2|PLK1|UBE2C|IK|SKA1|SKA3|BUB3|SH2B1|CD28|TRIP13…	120	GOBP_REGULATION_OF_MITOTIC_NUCLEAR_DIVISION	1.5957	0.0045	GOBP_REGULATION_OF_MITOTIC_NUCLEAR_DIVISION	REGULATION OF MITOTIC NUCLEAR DIVISION
Cell Cycle Regulation & Chromosome Organization	4	4	0.3631	0.0011	BUB1|BUB1B|NSMCE2|VPS4B|NUDC|DUSP1|HSPA1A|HSPA1B|NUSAP1|PHF13|PINX1|ARHGEF10|CHMP3|CHEK2|PRC1|PRP4K|PSRC1|FBXO5|RAB11A|TENT4A|NCAPG2|PPP1CC|LSM14A|RCC1|OFD1|SIRT1|NCAPH2|PPP2R1A|PRAP1|RRS1|KIF3B|KIF4A|AKAP8|VPS4A|AKAP8L|ANKRD53|CLASP1|CLASP2|TRIP13|APC|SMC1A|BAZ1B|BCCIP|SMC2|SMC3|SMC4|ESPL1|SPDL1|SPICE1|STAG1|STAG2|CEP192|CUL3|CCDC61|CCDC66|KAT2B|HNRNPU|CCSAP|CDCA5|TPR|CDK5RAP2|AAAS|TTK|RB1|CENPF…	197	GOBP_MITOTIC_SISTER_CHROMATID_SEGREGATION	1.7117	0	GOBP_MITOTIC_SISTER_CHROMATID_SEGREGATION	MITOTIC SISTER CHROMATID SEGREGATION
Cell Cycle Regulation & Chromosome Organization	4	4	0.3229	0.0015	NEK11|DDR2|BUB1|BUB1B|NSMCE2|VPS4B|DUSP1|E2F7|ORC1|ANLN|PABIR1|ANXA1|PDIK1L|ACTL6B|CCND1|EZH2|PINX1|AURKA|ERCC2|ID2|PKMYT1|TFAP4|CDK5RAP3|CDKN1A|PLRG1|CDKN1B|CDKN2D|ZC3H12D|ZFP36L1|CHEK1|MIR15B|ZFP36L2|MIR16-1|ARID1A|MIR19B1|ARID1B|MIR221|BRD7|MIR222|CCND3|CYP1A1|E2F1|PRP4K|CDC25B|TFDP1|PSME2|PTENP1-AS|FBXO5|RAB11A|RAD17|FOXO4|CUL4A|TAOK1|RCC2|TAOK2|RAD50|BCL2|NPM2|RAD51C|TGFB1|DCUN1D3|CDKN1C|DDB…	358	GOBP_REGULATION_OF_MITOTIC_CELL_CYCLE_PHASE_TRANSITION	1.6033	0.0001	GOBP_REGULATION_OF_MITOTIC_CELL_CYCLE_PHASE_TRANSITION	REGULATION OF MITOTIC CELL CYCLE PHASE TRANSITION
Cell Cycle Regulation & Chromosome Organization	4	4	0.2949	0.0005	DDR2|DUSP1|E2F7|ATF2|CCNA2|CCND1|EZH2|TCIM|ERCC2|ID2|TFAP4|TRIM71|UPF1|ZC3H12D|ARPP19|ZFP36L1|MIR15B|ZFP36L2|MIR16-1|CHEK2|MIR19B1|MIR221|MIR222|CRY1|E2F1|TFDP1|MAPK14|PTPN11|RAB11A|FOXO4|TAOK1|RCC2|TAOK2|TPD52L1|TGFB1|CDKN1C|PBX1|TRIM39|TMOD3|GPNMB|TMSB4X|PRAP1|ADAM17|CCND2|AKAP8|ATAD5|USH1C|USP28|VPS4A|AKAP8L|SPAST|BRD4|ATR|ATRIP|GIGYF2|BABAM1|BLM|ZNF16|BRIP1|CALM1|CDK4|ZNF830|CALM3|CEP63|CACNB…	570	GOBP_CELL_CYCLE_PHASE_TRANSITION	1.5357	0	GOBP_CELL_CYCLE_PHASE_TRANSITION	CELL CYCLE PHASE TRANSITION
Cell Cycle Regulation & Chromosome Organization	2.85387	2.85387	0.4663	0.0177	NDC80|NUF2|PLK1|LCMT1|IK|SKA1|BUB1|BUB1B|SKA3|BUB3|DUSP1|TRIP13|KLHL22|KNTC1|APC|XRCC3|SPC24|SPC25|TEX14|ZNF207|NUMA1|ZW10|SPDL1|ZWILCH|ZWINT|KNL1|ATM|KAT2B|MAD2L1|DYNC1LI1|MAD2L1BP|USP44|HNRNPU|PRP4K|PSMG2|MAD2L2|RAD21|FBXO5|AURKB|BECN1|TPR|CDK5RAP2|GEN1|TTK|CENPF|SIRT1|CCNB1|CDK1|HASPIN|PRAP1|ANAPC15|CDCA8|KAT5|BIRC5|CDC20|INCENP|MAD1L1	57	GOBP_REGULATION_OF_MITOTIC_SISTER_CHROMATID_SEGREGATION	1.8237	0.0014	GOBP_REGULATION_OF_MITOTIC_SISTER_CHROMATID_SEGREGATION	REGULATION OF MITOTIC SISTER CHROMATID SEGREGATION
Cell Cycle Regulation & Chromosome Organization	2.3279	2.3279	0.356	0.0432	LCMT1|FGF8|IGF1|BTC|IGF2|BUB1|BUB1B|EDN3|NSMCE2|DUSP1|NUSAP1|XRCC3|CUL9|ZWINT|EPGN|IL1B|KNL1|AURKA|PIWIL2|DLGAP5|EREG|PKMYT1|LRP5|DYNC1LI1|CHEK1|USP44|PRP4K|DAZL|PSMA8|MAD2L2|FBXO5|HORMAD1|RAD1|HOXA13|AURKB|PLCB1|NPM2|RAD51AP1|PIN1|FBXO43|FBXW5|NME6|INSR|RCC1|GEN1|CALR|MOS|MEIOSIN|NUP62|MSX1|MSX2|STRA8|UBE2B|HASPIN|PRAP1|SMPD3|ANAPC11|ANAPC15|NFE2L1|CUL7|LIF|RPS6KA2|WNT5A|ANAPC5|CDCA8|ANAPC7|CAV2…	148	GOBP_REGULATION_OF_NUCLEAR_DIVISION	1.5677	0.0047	GOBP_REGULATION_OF_NUCLEAR_DIVISION	REGULATION OF NUCLEAR DIVISION
Cell Cycle Regulation & Chromosome Organization	4	4	0.3881	0.0001	TRIM75|ACTR2|ACTR3|DUSP1|SLC26A8|ORC4|OSGIN2|OVOL1|XRCC2|YTHDC2|SYCE3|PDIK1L|MAPK15|FANCA|PIWIL1|AURKA|PIWIL2|TEX11|PIWIL3|PIWIL4|EREG|PKMYT1|DNMT3L|SPIRE1|SPIRE2|BRCA2|MNS1|BOLL|CATSPERZ|DAZL|PRR19|CDC25B|PSMA8|PSMC3IP|PSMD13|DMC1|UBB|PTTG1|PTTG2|PTTG3P|FBXO5|HORMAD1|RAD1|FOXJ2|RAD21L1|SLC25A31|RAD50|RAD51|NPM2|RAD51AP1|RAD51C|RAD51D|RAD54B|DDB1|RAD54L|RAD51B|INSR|RBBP8|LSM14B|SIRT7|REC114|CALR|…	298	GOBP_MEIOTIC_CELL_CYCLE	1.8425	0	GOBP_MEIOTIC_CELL_CYCLE	MEIOTIC CELL CYCLE
Cell Cycle Regulation & Chromosome Organization	4	4	0.2987	0.001	DDR2|USP2|EDN3|DUSP1|SDCBP|E2F7|ATF2|CCND1|EPGN|EZH2|ERCC2|EREG|ID2|TFAP4|LRP5|ZC3H12D|ZFP36L1|MIR15B|ZFP36L2|ANGEL2|MIR16-1|CHEK2|MIR19B1|MIR221|MIR222|E2F1|SIK1|TFDP1|PKN2|PML|FOXA1|PTPN11|RAB11A|FOXO4|TAOK1|RCC2|TAOK2|FZD3|TGFB1|ASCL1|CDKN1C|INSR|PBX1|TRIM35|TRIM39|TMOD3|GPNMB|SIRT1|PRAP1|ADAM17|CCND2|ATAD5|AFAP1L2|VPS4A|BRD4|ATR|AURKAIP1|GIGYF2|BABAM1|BLM|BORA|BRINP2|ZNF268|BTG3|CDK4|ZNF830|C…	528	GOBP_REGULATION_OF_MITOTIC_CELL_CYCLE	1.5459	0	GOBP_REGULATION_OF_MITOTIC_CELL_CYCLE	REGULATION OF MITOTIC CELL CYCLE
Cell Cycle Regulation & Chromosome Organization	4	4	0.3989	0.0019	NEK11|LCMT1|CHFR|WAC|BUB1|BRSK1|BUB1B|DUSP1|XPC|XRCC3|ORC1|ZFYVE19|PABIR1|MAP3K20|FANCD2|ATF2|ZWINT|CCND1|KNL1|DONSON|CDK5RAP3|CDKN1A|FOXN3|TREX1|DTL|DYNC1LI1|CHEK1|USP44|CHEK2|EME1|PRP4K|EME2|MRE11|MUC1|MAD2L2|TAOK3|ETAA1|NAE1|RAD17|AURKB|FOXO4|TAOK1|TAOK2|RAD50|RAD9B|BRCC3|RBBP8|GEN1|TRIM39|RFWD3|RINT1|HASPIN|CLSPN|PRAP1|RPA2|ANAPC15|CDCA8|TP53|CDC20|SDE2|INCENP|MAD1L1|CDK2|FBXO31|HUS1|FZR1|HUS…	136	GOBP_MITOTIC_CELL_CYCLE_CHECKPOINT_SIGNALING	1.7741	0.0001	GOBP_MITOTIC_CELL_CYCLE_CHECKPOINT_SIGNALING	MITOTIC CELL CYCLE CHECKPOINT SIGNALING
Cell Cycle Regulation & Chromosome Organization	4	4	0.3106	0.0008	DDR2|DUSP1|E2F7|ATF2|CCND1|EZH2|TCIM|ERCC2|ID2|TFAP4|ZC3H12D|ZFP36L1|MIR15B|ZFP36L2|MIR16-1|CHEK2|MIR19B1|MIR221|MIR222|CRY1|E2F1|TFDP1|MAPK14|PTPN11|RAB11A|FOXO4|TAOK1|RCC2|TAOK2|TGFB1|CDKN1C|PBX1|TRIM39|TMOD3|GPNMB|TMSB4X|PRAP1|ADAM17|CCND2|ATAD5|USP28|VPS4A|BRD4|ATR|ATRIP|GIGYF2|BABAM1|BLM|ZNF16|BRIP1|CDK4|ZNF830|CEP63|CACNB4|KLF4|EIF2AK4|PTEN|CCNE1|CCNE2|CCNH|CCNQ|CDC14A|CDC14B|CDC14C|CDC25A|…	467	GOBP_REGULATION_OF_CELL_CYCLE_PHASE_TRANSITION	1.5948	0	GOBP_REGULATION_OF_CELL_CYCLE_PHASE_TRANSITION	REGULATION OF CELL CYCLE PHASE TRANSITION
Cell Cycle Regulation & Chromosome Organization	2.48149	2.48149	0.2942	0.0331	BTC|BUB1|BUB1B|EDN3|NSMCE2|VPS4B|NUDC|UBXN2B|DUSP1|HSPA1A|HSPA1B|NUSAP1|ANLN|EPGN|IL1B|PHF13|PINX1|AURKA|EREG|PKMYT1|CDKN1B|LRP5|ARHGEF10|PPP2R2D|CHEK1|CHMP3|CHEK2|PRC1|PRP4K|NDEL1|PSRC1|FBXO5|RAB11A|TENT4A|NCAPG2|NPM2|TGFB1|PPP1CC|CDKN1C|LSM14A|RANBP1|INSR|RCC1|REEP3|REEP4|OFD1|SIRT1|NCAPH2|PPP2R1A|PRAP1|NFE2L1|RRS1|CUL7|KIF3B|KIF4A|CDC42|AKAP8|VPS4A|AKAP8L|SPAST|ANKRD53|CLASP1|SH2B1|CLASP2|TRIP…	286	GOBP_MITOTIC_NUCLEAR_DIVISION	1.4378	0.0033	GOBP_MITOTIC_NUCLEAR_DIVISION	MITOTIC NUCLEAR DIVISION
Cell Cycle Regulation & Chromosome Organization	2.49485	2.49485	0.3717	0.0328	NFRKB|BUB1|NSMCE2|CTNNB1|HSP90AA1|UCHL5|MACROH2A1|MAP2K7|NUMA1|YY1|MAPK15|DDX11|DHX36|HNRNPD|TNKS|TNKS2|TFPT|GNL3|MRE11|TERF2|CCT2|CCT3|CCT4|CCT5|CCT7|CCT8|PML|TCP1|AURKB|RAD50|NCAPG2|FBXO4|MAPKAPK5|FEN1|MAPK1|PNKP|NCAPH2|PRAP1|RTEL1|KAT5|PTGES3|MAD1L1|CDK2|ACTR5|CCT6A|ACTR8|NEK7|SKA1|INO80|INO80B|MYC|POT1|SKA3|INO80C|INO80D|INO80E|SHCBP1L|ATR|SLF1|SLF2|NEK2|SLX4|ACTL6A|PPP1R10|SMC2|LIG4|SMC4|MAP…	105	GOBP_POSITIVE_REGULATION_OF_CHROMOSOME_ORGANIZATION	1.6078	0.0032	GOBP_POSITIVE_REGULATION_OF_CHROMOSOME_ORGANIZATION	POSITIVE REGULATION OF CHROMOSOME ORGANIZATION
Cell Cycle Regulation & Chromosome Organization	4	4	0.4281	0.0025	LCMT1|CHFR|BUB1|BUB1B|NSMCE2|DUSP1|XRCC3|NUMA1|MAP3K20|MAPK15|ZWINT|ACTL6B|KNL1|DLGAP5|DPF3|DYNC1LI1|USP44|ARID1A|ARID1B|BRD7|PRP4K|MAD2L2|FBXO5|NEK6|AURKB|BECN1|GEN1|MOS|RIOK2|RMI2|SIRT1|HASPIN|ANAPC1|PRAP1|ANAPC11|DPF1|DPF2|PBRM1|ANAPC15|PHF10|ANAPC2|ANAPC4|HECW2|ANAPC5|CDCA8|ANAPC7|KAT5|CDC16|CDC20|CENPE|CDC23|INCENP|CDC27|MAD1L1|SMARCA2|NDC80|SMARCC2|NUF2|PLK1|SMARCD1|SMARCD2|UBE2C|IK|SMARCE1…	107	GOBP_REGULATION_OF_SISTER_CHROMATID_SEGREGATION	1.8487	0.0001	GOBP_REGULATION_OF_SISTER_CHROMATID_SEGREGATION	REGULATION OF SISTER CHROMATID SEGREGATION
Cell Cycle Regulation & Chromosome Organization	2.65758	2.65758	0.3968	0.0242	LCMT1|BUB1|WAPL|BUB1B|DUSP1|XRCC3|ZWINT|KNL1|PINX1|TNKS|TNKS2|EXOSC10|SMARCA5|DYNC1LI1|USP44|SRC|PRP4K|TERF2|ERCC4|HNRNPC|MAD2L2|PIF1|PML|FBXO5|AURKB|TENT4B|RAD50|H3-3A|H3-3B|GEN1|XRN1|HASPIN|PRAP1|ANAPC15|RTEL1|CDCA8|XRCC1|TP53|CDC20|INCENP|MAD1L1|NDC80|NUF2|PLK1|IK|SKA1|POT1|SETMAR|SKA3|BUB3|TRIP13|KLHL22|CTC1|KNTC1|SLX4|APC|BAZ1B|SPC24|SPC25|TEX14|ZNF207|ESPL1|ZW10|SPDL1|ZWILCH|ACD|PARP1|ATRX|…	97	GOBP_NEGATIVE_REGULATION_OF_CHROMOSOME_ORGANIZATION	1.6932	0.0022	GOBP_NEGATIVE_REGULATION_OF_CHROMOSOME_ORGANIZATION	NEGATIVE REGULATION OF CHROMOSOME ORGANIZATION
Cell Cycle Regulation & Chromosome Organization	3.04576	3.04576	0.3226	0.0129	NEK11|MIR134|BUB1|BUB1B|DUSP1|E2F7|ORC1|OVOL1|PABIR1|YTHDC2|PDIK1L|ATF2|CCND1|EZH2|PINX1|PKMYT1|CDK5RAP3|CDKN1A|CDKN1B|CDKN2D|ZC3H12D|ZFP36L1|CHEK1|MIR15B|ZFP36L2|ANGEL2|MIR16-1|CHEK2|MIR19B1|BRD7|PRP4K|PML|FBXO5|RAD17|FOXO4|TAOK1|TAOK2|RAD50|BCL2|FZD3|BCL6|DCUN1D3|CDKN1C|RAD9B|RBBP8|RBL1|RBL2|TRIM35|TRIM39|RFWD3|GPNMB|RINT1|MIR133B|PRAP1|SDE2|VPS4A|SETMAR|TRIP13|ATR|AURKAIP1|GIGYF2|APC|BABAM1|BL…	245	GOBP_NEGATIVE_REGULATION_OF_MITOTIC_CELL_CYCLE	1.5232	0.0009	GOBP_NEGATIVE_REGULATION_OF_MITOTIC_CELL_CYCLE	NEGATIVE REGULATION OF MITOTIC CELL CYCLE
Cell Cycle Regulation & Chromosome Organization	4	4	0.3057	0.0012	DDR2|DUSP1|E2F7|CCNA2|CCND1|EZH2|ERCC2|ID2|TFAP4|TRIM71|ZC3H12D|ARPP19|ZFP36L1|MIR15B|ZFP36L2|MIR16-1|CHEK2|MIR19B1|MIR221|MIR222|E2F1|TFDP1|RAB11A|FOXO4|TAOK1|RCC2|TAOK2|TPD52L1|TGFB1|CDKN1C|PBX1|TRIM39|TMOD3|GPNMB|PRAP1|ADAM17|CCND2|ATAD5|USH1C|VPS4A|SPAST|BRD4|ATR|GIGYF2|BABAM1|BLM|CALM1|CDK4|ZNF830|CALM3|CACNB4|CACUL1|CCDC57|KLF4|CCNA1|CTDP1|CCNB2|CCNB3|PTEN|CCNE1|CCNE2|CCNF|CCNG1|CCNG2|CCNH|…	458	GOBP_MITOTIC_CELL_CYCLE_PHASE_TRANSITION	1.5697	0	GOBP_MITOTIC_CELL_CYCLE_PHASE_TRANSITION	MITOTIC CELL CYCLE PHASE TRANSITION
Cell Cycle Regulation & Chromosome Organization	4	4	0.3773	0.0001	CENPV|NFRKB|BUB1|BUB1B|NSMCE2|HSP90AA1|DUSP1|UCHL5|USP7|YY1|EID3|MAPK15|ACTL6B|DHX36|HNRNPD|PINX1|TNKS|TNKS2|EXOSC10|TFPT|UPF1|SRC|ARID1A|ARID1B|BRD7|PRP4K|TERF2|CCT2|CCT3|CCT4|CCT5|HNRNPC|CCT7|CCT8|PIF1|PML|FBXO5|TCP1|TENT4B|RAD50|NCAPG2|H3-3A|H3-3B|MAPK1|MOS|RIOK2|RMI2|SIRT1|NSMCE1|RNF4|NSMCE4A|NCAPH2|PRAP1|DPF1|DPF2|PBRM1|PHF10|RTEL1|FSHR|SENP6|SMARCA2|ACTR5|SMARCC2|ACTR8|NEK7|SMARCD1|SMARCD2|…	244	GOBP_REGULATION_OF_CHROMOSOME_ORGANIZATION	1.8282	0	GOBP_REGULATION_OF_CHROMOSOME_ORGANIZATION	REGULATION OF CHROMOSOME ORGANIZATION
Cell Cycle Regulation & Chromosome Organization	4	4	0.5073	0.0001	NDC80|NUF2|PLK1|LCMT1|UBE2C|CHFR|IK|SKA1|BUB1|BUB1B|NSMCE2|SKA3|BUB3|DUSP1|TRIP13|KLHL22|KNTC1|SMARCAD1|APC|XRCC3|SMC2|SPC24|SMC4|SPC25|TEX14|ZNF207|ESPL1|NUMA1|ZW10|SPDL1|ZWILCH|MAPK15|ZWINT|CSNK2A2|KNL1|CUL3|DIS3L2|DLGAP5|ATM|M1AP|MAD2L1|PLSCR1|DYNC1LI1|MAD2L1BP|USP44|PRP4K|PSMG2|MAD2L2|RAD21|FBXO5|AURKB|NCAPG2|TOP3A|TPR|CDK5RAP2|GEN1|RECQL5|MOS|CENATAC|TTK|RB1|CENPF|CCNB1|HASPIN|NCAPH2|PPP2R1A…	83	GOBP_CHROMOSOME_SEPARATION	2.1012	0	GOBP_CHROMOSOME_SEPARATION	CHROMOSOME SEPARATION
Cell Cycle Regulation & Chromosome Organization	4	4	0.4318	0.0002	NEK11|WAC|BRSK1|WDR76|XPC|ORC1|MAP3K20|FANCD2|ATF2|CCND1|DONSON|CDK5RAP3|DOT1L|CDKN1A|BRCA2|FOXN3|TREX1|DTL|CHEK1|CHEK2|CRY1|E2F1|EME1|EME2|MRE11|MUC1|MAPK14|TAOK3|ETAA1|FBXO6|PTPN11|NAE1|FEM1B|RAD1|RAD17|FOXO4|CUL4A|TAOK1|TAOK2|RAD51|FBXO4|PRPF19|RAD9B|BRCC3|LYN|DNA2|TRIM39|RFWD3|RHNO1|RINT1|H2AX|PARP9|RPA4|CLSPN|RNASEH2B|RPA2|CDT1|TP53|HINFP|UFL1|SDE2|CDK2|FBXO31|HUS1|FZR1|HUS1B|PLK1|USP28|BRD4…	124	GOBP_DNA_INTEGRITY_CHECKPOINT_SIGNALING	1.9104	0	GOBP_DNA_INTEGRITY_CHECKPOINT_SIGNALING	DNA INTEGRITY CHECKPOINT SIGNALING
Cell Cycle Regulation & Chromosome Organization	4	4	0.4965	0.0028	PLK1|BUB1|CHTF8|WAPL|BUB1B|NSMCE2|CTNNB1|SGO2|MACROH2A1|SLF1|SLF2|SMC1A|SGO1|SMC1B|NIPBL|PPP2R1B|SMC3|PPP2R5C|ESPL1|KIF22|STAG1|STAG2|STAG3|PDS5A|FBXW7|PDS5B|DDX11|ATRX|DDX11L8|DDX12P|TNKS|PHB2|AXIN2|POGZ|DSCC1|PPP2R5D|SMC5|MRE11|MAU2|ESCO1|ESCO2|RAD21|MCMBP|HORMAD1|MEIKIN|TENT4A|RAD21L1|CDCA5|RAD51C|FEN1|RB1|GTF2B|HASPIN|SFPQ|PPP2R1A|CTCF|NAA10|NAA50|REC8|HDAC8|BOD1|CDC20|HORMAD2	63	GOBP_SISTER_CHROMATID_COHESION	1.9431	0.0001	GOBP_SISTER_CHROMATID_COHESION	SISTER CHROMATID COHESION
Cell Cycle Regulation & Chromosome Organization	2.72125	2.72125	0.2896	0.0222	DUSP1|E2F7|E2F8|ATF2|TAF6|CCND1|EZH2|TNKS|TENT5B|TFAP4|ETS1|ZC3H12D|ZFP36L1|MIR15B|ZFP36L2|ANGEL2|MIR16-1|CHEK2|MIR19B1|CRY1|E2F1|MAPK14|PML|PTPN11|FOXO4|TAOK1|TAOK2|TP53BP2|FZD3|RNF167|TGFB1|CDKN1C|TRIM35|TRIM39|GPNMB|SIRT1|TMSB4X|PRAP1|USP28|VPS4A|BRD4|ATR|ATRIP|AURKAIP1|GIGYF2|BABAM1|BAZ1B|BLM|HOXD10|BRINP2|BRIP1|HTRA2|BTG3|ZNF830|KAT2A|CEP63|ATRX|CACNB4|KLF4|EIF2AK4|GPER1|KAT2B|PTEN|CCNF|NHER…	398	GOBP_NEGATIVE_REGULATION_OF_CELL_CYCLE	1.4522	0.0019	GOBP_NEGATIVE_REGULATION_OF_CELL_CYCLE	NEGATIVE REGULATION OF CELL CYCLE
Cell Cycle Regulation & Chromosome Organization	2.92082	2.92082	0.4845	0.0157	NDC80|NUF2|PLK1|LCMT1|CHFR|IK|SKA1|BUB1|BUB1B|SKA3|BUB3|DUSP1|TRIP13|KLHL22|KNTC1|APC|XRCC3|SPC24|SPC25|TEX14|ZNF207|ZW10|SPDL1|ZWILCH|ZWINT|KNL1|ATM|MAD2L1|DYNC1LI1|MAD2L1BP|USP44|PRP4K|PSMG2|MAD2L2|RAD21|FBXO5|AURKB|TPR|CDK5RAP2|GEN1|MOS|TTK|CENPF|SIRT1|CCNB1|HASPIN|PRAP1|ANAPC15|CDCA8|BIRC5|CDC20|INCENP|MAD1L1	53	GOBP_NEGATIVE_REGULATION_OF_CHROMOSOME_SEGREGATION	1.8596	0.0012	GOBP_NEGATIVE_REGULATION_OF_CHROMOSOME_SEGREGATION	NEGATIVE REGULATION OF CHROMOSOME SEGREGATION
Cell Cycle Regulation & Chromosome Organization	2.31876	2.31876	0.559	0.0438	TTI2|RFWD3|BRD4|ETAA1|BABAM2|CCAR2|BARD1|FEM1B|WDR76|CUL4A|RNASEH2B|BRCA2|RAD51|PPP1R10|RPA2|BRCA1|FBXO4|CHEK2|BRCC3|CRY1|MAP3K20|TELO2|TTI1	23	GOBP_REGULATION_OF_DNA_DAMAGE_CHECKPOINT	1.7839	0.0048	GOBP_REGULATION_OF_DNA_DAMAGE_CHECKPOINT	REGULATION OF DNA DAMAGE CHECKPOINT
Cell Cycle Regulation & Chromosome Organization	2.79588	2.79588	0.4052	0.0193	TRIM75|CKS2|CNTD1|MAEL|ZCWPW1|SYCE3|FANCD2|PDIK1L|ZSCAN21|MAPK15|ZWINT|KNL1|DDX4|AURKA|PIWIL2|TEX11|KASH5|DMRTC2|PKMYT1|DNMT3L|BRCA2|EME1|EME2|MRE11|CDC25B|PSMA8|PSMC3IP|PSMD13|ERCC4|UBR2|DMC1|UBB|PTTG1|USP17L2|PTTG2|PTTG3P|FBXO5|HORMAD1|FOXJ2|BAG6|SLC25A31|RAD50|FANCM|RAD51|RAD51AP1|RAD51C|RAD51D|RAD54B|RAD54L|RAD51B|FOXJ3|SIRT7|REC114|UBE2B|RNF212|RNF212B|RPL10L|REC8|TOP2A|CENPC|HFM1|CDC20|HSF2…	142	GOBP_MEIOSIS_I_CELL_CYCLE_PROCESS	1.7194	0.0016	GOBP_MEIOSIS_I_CELL_CYCLE_PROCESS	MEIOSIS I CELL CYCLE PROCESS
Cell Cycle Regulation & Chromosome Organization	4	4	0.4118	0.0001	NEK11|LCMT1|CHFR|WAC|BUB1|BRSK1|BUB1B|DUSP1|PROX1|WDR76|XPC|XRCC3|ORC1|ZFYVE19|PABIR1|MAP3K20|FANCD2|ATF2|ZWINT|CCND1|KNL1|DONSON|CDK5RAP3|DOT1L|CDKN1A|BRCA2|FOXN3|TREX1|DTL|DYNC1LI1|CHEK1|USP44|CHEK2|CRY1|E2F1|EME1|PRP4K|EME2|MRE11|MUC1|MAD2L2|MAPK14|TAOK3|ETAA1|FBXO6|PTPN11|HORMAD1|NAE1|FEM1B|RAD1|RAD17|AURKB|FOXO4|CUL4A|TAOK1|TAOK2|RAD50|RAD51|FBXO4|PRPF19|RAD9B|BRCC3|RBBP8|LYN|DNA2|GEN1|TRIM3…	185	GOBP_CELL_CYCLE_CHECKPOINT_SIGNALING	1.9186	0	GOBP_CELL_CYCLE_CHECKPOINT_SIGNALING	CELL CYCLE CHECKPOINT SIGNALING
Cell Cycle Regulation & Chromosome Organization	2.31876	2.31876	0.3296	0.0439	BUB1|BUB1B|DUSP1|E2F7|ORC1|PABIR1|PDIK1L|CCND1|EZH2|PINX1|PKMYT1|CDK5RAP3|CDKN1A|CDKN2D|ZC3H12D|ZFP36L1|CHEK1|MIR15B|ZFP36L2|MIR16-1|MIR19B1|BRD7|PRP4K|FBXO5|RAD17|FOXO4|TAOK1|TAOK2|RAD50|BCL2|DCUN1D3|RBBP8|RBL1|RBL2|TRIM39|RFWD3|GPNMB|RINT1|MIR133B|PRAP1|SDE2|VPS4A|TRIP13|ATR|GIGYF2|APC|BABAM1|BLM|NOP53|SPDL1|ZNF830|STK35|CACNB4|FBXO7|KLF4|SYF2|PRMT2|PTEN|PRKDC|TFDP3|CDC14B|TICRR|CDC6|CDK2AP2|TO…	193	GOBP_NEGATIVE_REGULATION_OF_MITOTIC_CELL_CYCLE_PHASE_TRANSITION	1.5147	0.0048	GOBP_NEGATIVE_REGULATION_OF_MITOTIC_CELL_CYCLE_PHASE_TRANSITION	NEGATIVE REGULATION OF MITOTIC CELL CYCLE PHASE TRANSITION
Cell Cycle Regulation & Chromosome Organization	4	4	0.4009	0.0005	TRIM75|ACTR2|ACTR3|ORC4|OVOL1|SYCE3|PDIK1L|MAPK15|FANCA|AURKA|PIWIL2|TEX11|EREG|PKMYT1|DNMT3L|SPIRE1|SPIRE2|BRCA2|CATSPERZ|DAZL|CDC25B|PSMA8|PSMC3IP|PSMD13|DMC1|UBB|PTTG1|PTTG2|PTTG3P|FBXO5|HORMAD1|RAD1|FOXJ2|SLC25A31|RAD50|RAD51|NPM2|RAD51AP1|RAD51C|RAD51D|RAD54B|DDB1|RAD54L|RAD51B|LSM14B|SIRT7|REC114|CALR|MOS|NSUN2|UBE2B|RNF212|RNF212B|NCAPH2|PPP2R1A|RPL10L|RAB24|REC8|RPS6KA2|WNT5A|SEPTIN1|ANKL…	226	GOBP_MEIOTIC_CELL_CYCLE_PROCESS	1.8264	0	GOBP_MEIOTIC_CELL_CYCLE_PROCESS	MEIOTIC CELL CYCLE PROCESS
Cell Cycle Regulation & Chromosome Organization	4	4	0.4465	0.0001	LCMT1|CHFR|BUB1|BUB1B|NSMCE2|DUSP1|XRCC3|NUMA1|MAP3K20|MAPK15|ZWINT|ACTL6B|CSNK2A2|KNL1|DLGAP5|PUM1|PUM2|DPF3|PPP2R2A|DYNC1LI1|PPP2R2D|USP44|ARID1A|ARID1B|BRD7|PRP4K|ENSG00000266560|MAD2L2|FBXO5|HORMAD1|NEK6|AURKB|RAD18|RCC2|NCAPG2|BECN1|GEN1|MOS|RIOK2|RMI2|SIRT1|HASPIN|NCAPH2|ANAPC1|PRAP1|ANAPC11|DPF1|DPF2|PBRM1|ANAPC15|PHF10|ANAPC2|CSNK2A1|ANAPC4|HECW2|ANAPC5|CDCA8|ANAPC7|KAT5|CDC16|CDC20|CENPE…	134	GOBP_REGULATION_OF_CHROMOSOME_SEGREGATION	1.9815	0	GOBP_REGULATION_OF_CHROMOSOME_SEGREGATION	REGULATION OF CHROMOSOME SEGREGATION
Cellular Response to ROS and Chemical Stress	3	-3	-0.3486	0.0131	CYGB|DDR2|COL6A1|DUSP1|CAMKK2|ANKZF1|STK25|HIF1A|FXN|HYAL2|AQP1|KPNA4|EZH2|PEX2|PCNA|PEX5|PJVK|SRC|FBLN5|MMP2|CYP1B1|COA8|PEX10|PEX12|PEX14|APOA4|TACR1|FOXO3|APOE|BCL2|GATA5|LRRK2|TRAP1|MAPK8|SESN2|SIRT1|TXNIP|MIR17|NOS3|TRPM2|MIR34A|PDGFD|HMOX1|NME8|ZNF580|CFL1|PDK2|HDAC2|ERCC6|ERN1|AMBP|NR4A3|CRK|CRYAA|CD36|KLF2|KLF4|PLEKHA1|MB|HSF1|NFE2L2|CCS|TOP2B|FABP1|ECT2|KDM6B|EDN1|SOD3|RELA|AREG|ATP7A|BA…	204	GOBP_RESPONSE_TO_REACTIVE_OXYGEN_SPECIES	-1.6253	0.001	GOBP_RESPONSE_TO_REACTIVE_OXYGEN_SPECIES	RESPONSE TO REACTIVE OXYGEN SPECIES
Cellular Response to ROS and Chemical Stress	3.22185	-3.22185	-0.3264	0.0093	CYGB|ALDH3B1|DDR2|ABCD1|HSPA1A|HSPA1B|WNT16|CAMKK2|FUT8|ANKZF1|STK24|STK25|HIF1A|SLC4A11|STK26|FXN|AQP1|RBX1|ATF2|EZH2|PEX2|PCNA|PEX5|PJVK|PNPT1|ZC3H12A|SRC|TMEM161A|FBLN5|MMP2|CYP1B1|STAU2|PEX10|PEX12|PEX14|PML|PRR5L|APOA4|FOXO3|SLC25A24|TP53INP1|DAPK1|GATA5|LRRK2|TRAP1|ZFAND1|MAPK8|DHRS2|PNPLA8|SESN2|MEAK7|SIRT1|XBP1|MIR17|NFE2L1|NOS3|TRPM2|MIR34A|PDGFD|NME8|NAGLU|ZNF580|EIF2S1|CFL1|TMIGD1|STAU…	259	GOBP_CELLULAR_RESPONSE_TO_OXIDATIVE_STRESS	-1.5915	0.0006	GOBP_CELLULAR_RESPONSE_TO_OXIDATIVE_STRESS	CELLULAR RESPONSE TO OXIDATIVE STRESS
Cellular Response to ROS and Chemical Stress	2.3098	-2.3098	-0.4202	0.044	ZNF580|ZNF277|BNIP3|CFL1|MYB|HDAC6|PPEF2|HDAC2|ANKZF1|ERN1|RIPK3|PPP5C|RPS3|FXN|MAP3K5|AQP1|TNFAIP3|EZH2|PCGF2|TRPC6|PCNA|KLF2|KLF4|MIR103A1|PLEKHA1|SIRPA|MAPK13|SRC|HSF1|NFE2L2|AIFM1|CYP1B1|PRKAA1|CDKN2A|TOP2B|FABP1|ECT2|KDM6B|EDN1|MAP1LC3A|NPPA|MDM2|NET1|RIPK1|PPIF|BECN1|RELA|PRKCD|GATA5|IL6|SETX|CAT|SIRT1|LCN2|CDK1|MIR107|TRPA1|SMPD3|RHOB|PARK7|SPHK1|CBX8|TRPM2|ABL1|IL18BP|TXN|IL18RAP|MAPK7|PD…	71	GOBP_CELLULAR_RESPONSE_TO_HYDROGEN_PEROXIDE	-1.6513	0.0049	GOBP_CELLULAR_RESPONSE_TO_HYDROGEN_PEROXIDE	CELLULAR RESPONSE TO HYDROGEN PEROXIDE
Cellular Response to ROS and Chemical Stress	3.39794	-3.39794	-0.4007	0.0066	CYGB|DDR2|FOS|MIRLET7B|ROMO1|HDAC6|CAMKK2|ANKZF1|MAP2K4|RIPK3|RPS3|STK25|FXN|MAP3K5|AKT1|AQP1|MAPK9|TNFAIP3|EZH2|PEX2|TRPC6|PCNA|PEX5|PJVK|MIR103A1|TREX1|MAPK13|SRC|FBLN5|MMP2|CYP1B1|MPO|CDKN2A|PEX10|PEX12|PEX14|HGF|MAPT|NPPA|MDM2|MET|APOA4|FOXO3|NET1|MMP3|RIPK1|PINK1|PPIF|BECN1|MIR21|ADPRS|BTK|GATA5|LRRK2|TRAP1|MAPK8|NQO1|SETX|SIRT1|MIR107|OGG1|SMPD3|MIR17|SOD2|AGAP3|PTPRK|CBX8|NOS3|CRYGD|TRPM2|…	152	GOBP_CELLULAR_RESPONSE_TO_REACTIVE_OXYGEN_SPECIES	-1.7913	0.0004	GOBP_CELLULAR_RESPONSE_TO_REACTIVE_OXYGEN_SPECIES	CELLULAR RESPONSE TO REACTIVE OXYGEN SPECIES
Cellular Response to ROS and Chemical Stress	3.39794	-3.39794	-0.3096	0.0061	CYGB|ALDH3B1|DDR2|ABCD1|HSPA1A|HSPA1B|WNT16|CAMKK2|FUT8|ANKZF1|STK24|STK25|HIF1A|SLC4A11|STK26|EIF2AK3|FXN|AQP1|RBX1|ATF2|AKR1B1|ERRFI1|EZH2|PEX2|PCNA|PEX5|PJVK|PNPT1|ZC3H12A|ZFP36L1|SRC|TMEM161A|ARHGEF2|FBLN5|MMP2|CYP1B1|STAU2|PEX10|PEX12|PEX14|PML|PRR5L|APOA4|SLC25A23|FOXO3|SLC25A24|YBX3|TP53INP1|DAPK1|GATA5|LRRK2|TRAP1|GDF15|ZFAND1|MAPK8|DHRS2|TSPO|PNPLA8|CAPN3|SESN2|MEAK7|SIRT1|XBP1|DNAJA1|MI…	330	GOBP_CELLULAR_RESPONSE_TO_CHEMICAL_STRESS	-1.5526	0.0004	GOBP_CELLULAR_RESPONSE_TO_CHEMICAL_STRESS	CELLULAR RESPONSE TO CHEMICAL STRESS
Chromatin & Nucleosome Organization	3.30103	3.30103	0.3495	0.0084	CENPV|UBTFL6|H1-0|H1-1|H1-10|H1-2|H1-3|H1-4|H1-5|CHAF1A|H1-6|CHAF1B|H2AB1|H2AB2|H2AB3|CHD2|OIP5|ATAD2|ATAD2B|TAF6|TAF9|GRWD1|H2BC13|H2BC14|H2BC15|H2AC25|H2BC17|H2BC3|H2BC9|H3C1|H3C10|H3C11|H3C12|H3C13|POGZ|H3C14|H3C15|H3C2|H3C3|H3C4|H3C6|H3C7|H3C8|ARID1A|H4C1|H4C11|H4C12|H4C13|H4C14|H4C15|H4C16|H4C2|NFE2|H4C3|ASF1B|H4C4|H4C5|DMC1|H4C6|H4C7|H4C8|CREB1|H4C9|HAT1|HIRA|KAT6A|MED21|NASP|RAD51|H3-3A|H3…	263	GOBP_PROTEIN_DNA_COMPLEX_ORGANIZATION	1.6351	0.0005	GOBP_PROTEIN_DNA_COMPLEX_ORGANIZATION	PROTEIN DNA COMPLEX ORGANIZATION
Chromatin & Nucleosome Organization	2.40894	2.40894	0.4168	0.0378	H1-0|H1-1|H1-10|H1-2|H1-3|H1-4|H1-5|CHAF1A|H1-6|MACROH2A1|CHAF1B|H2AB1|H2AB2|H2AB3|CHD2|ATAD2|ATAD2B|GRWD1|H2BC13|MCM2|H2BC14|H2BC15|H2AC25|H2BC17|H2BC3|H2BC9|H3C1|H3C10|H3C11|SMARCA5|H3C12|H3C13|H3C14|H3C15|H3C2|H3C3|H3C4|H3C6|H3C7|H3C8|ARID1A|H4C1|H3-4|H4C11|H4C12|H4C13|H4C14|H4C15|H4C16|H4C2|NFE2|H4C3|ASF1B|H4C4|MACROH2A2|H4C5|NAP1L2|H4C6|H4C7|H4C8|H4C9|HAT1|TSPYL5|HIRA|KAT6A|NASP|H3-3A|H3-3B|…	139	GOBP_NUCLEOSOME_ORGANIZATION	1.6632	0.0039	GOBP_NUCLEOSOME_ORGANIZATION	NUCLEOSOME ORGANIZATION
Cytokine & Interferon Signaling	2.92082	-2.92082	-0.3469	0.0153	DICER1|SIGIRR|TNFRSF11B|MIR99A|MIRLET7C|HSPA1A|TTLL12|ULK1|HSPA1B|UBE2K|CARD16|IFIH1|ECM1|CDC37|USP29|CASP4|HIF1A|APOA1|IKBKB|IKBKE|CSF1|TAF9|SLIT2|IRAK1|IRAK2|AXL|IRAK3|IRF3|AGPAT1|AGPAT2|IRF7|IRGM|MIR130A|TMC8|PPARG|TLE5|LRRC70|MAPKAPK2|PTPN11|RBM47|RFFL|LSM14A|TRAIP|MAVS|MIR27A|MIR27B|MIR146A|MIR152|TRIM32|ADAM17|WNT5A|YTHDF3|PADI2|SH2B3|NAIP|USP27X|CDK5R1|ADIPOQ|NLRP2B|GIGYF2|NLRP6|YTHDF2|CD4…	207	GOBP_REGULATION_OF_RESPONSE_TO_CYTOKINE_STIMULUS	-1.6053	0.0012	GOBP_REGULATION_OF_RESPONSE_TO_CYTOKINE_STIMULUS	GOBP_INFLAMMATORY_CELL_APOPTOTIC_PROCESS
Cytokine & Interferon Signaling	2.85387	-2.85387	-0.5136	0.0176	STK39|XCL1|RIPOR2|ROBO1|THPO|CCL19|DUSP1|CCR2|ACKR2|CCR6|ACKR4|RIPOR1|ACKR3|CCR10|CCR4|FOXC1|CCR8|CCL5|CCR9|XCL2|CCRL2|CXCR1|CXCR6|MPL|HIF1A|STAT5A|CXCR4|JAK2|RNF113A|SLIT2|CCR5|CX3CL1|CCR1|CXCR5|CX3CR1|CXCL12|CXCL13|TREM2|XCR1|CMKLR1|ZC3H12A|CXCL6|ACKR1|GPR17|GPR75|LOX|CCL2|CCL8|EDN1|TFF2|ENTREP1|WBP1L|RBM15|WNK1|CXCR2|MIR20A|CIB1|CXCL10|CXCL11|CXCL9|CXCR3|PTK2B|LYN|MIR101-1|CCL1|CCL13|CCL14|SLI…	93	GOBP_RESPONSE_TO_CHEMOKINE	-1.8436	0.0014	GOBP_RESPONSE_TO_CHEMOKINE	RESPONSE TO CHEMOKINE
Cytokine & Interferon Signaling	4	-4	-0.496	0.0001	IFITM1|IFITM2|STING1|IFITM3|IFNAR1|IFNAR2|IFNGR2|IFNL1|IFNL2|IFNL3|IFNL4|IFNLR1|TBK1|TTLL12|IL10RB|HCK|UBE2K|IFIH1|IFNG|CDC37|USP29|ADAR|ISG15|DNAJA3|IKBKE|JAK2|IRAK1|TRAF3|IFNGR1|OAS2|IRF1|IRF3|IRF7|TRIM6|IRGM|TREX1|USP18|PPARG|TRIM65|TXK|METTL3|MYD88|PTPN11|RBM47|MMP12|MIR21|ZBP1|HDAC4|LSM14A|NLRC5|MAVS|PARP14|PARP9|WNT5A|YTHDF3|TP53|TYK2|CACTIN|USP27X|AZI2|JAK1|GIGYF2|YTHDF2|MUL1|NR1H3|OAS1|OA…	113	GOBP_INTERFERON_MEDIATED_SIGNALING_PATHWAY	-2.1284	0	GOBP_INTERFERON_MEDIATED_SIGNALING_PATHWAY	INTERFERON MEDIATED SIGNALING PATHWAY
Cytokine & Interferon Signaling	3.09691	-3.09691	-0.4448	0.0117	IFITM1|IFITM2|STING1|IFITM3|USP27X|AZI2|IFNAR1|IFNAR2|JAK1|TBK1|TTLL12|UBE2K|GIGYF2|IFIH1|CDC37|USP29|YTHDF2|MUL1|ADAR|SMPD1|ISG15|SETD2|OAS1|OAS3|OASL|IFIT1|IKBKE|RNF185|MX1|IRAK1|SAMHD1|TRAF3|OAS2|CNOT7|IRF3|IRF7|TRIM6|SHFL|TREX1|SP100|DCST1|USP18|CH25H|CR2|SMIM30|TRIM65|METTL3|PTPN2|PTPN6|STAT1|STAT2|MYD88|PTPN11|RBM47|TANK|TBKBP1|MMP12|MIR21|ZBP1|HDAC4|LSM14A|SHMT2|EIF4E2|NLRC5|PTPN1|IFNA1|IF…	92	GOBP_RESPONSE_TO_TYPE_I_INTERFERON	-1.8309	0.0008	GOBP_RESPONSE_TO_TYPE_I_INTERFERON	RESPONSE TO TYPE I INTERFERON
Cytokine & Interferon Signaling	4	-4	-0.3508	0	DICER1|SIGIRR|TNFRSF11B|STAT3|TNFRSF11A|TNFSF11|SOCS2|ECM1|EDA|SH2B2|EDAR|IL3|NUMBL|EDN2|ACSL1|HIF1A|ILK|SLC27A1|CSF1|SLIT2|SMAD4|FLT3|EREG|MIR130A|TMC8|SRC|PPARG|SPI1|DUOX1|MAPK14|MAPKAPK2|TNFRSF18|MYD88|TNFRSF19|TNFRSF25|PTPN11|RBM47|RFFL|FZD4|P4HB|TRADD|TRAF1|TRAF5|TRAIP|SIRT1|TMSB4X|CD70|TRIM32|BBS2|TNFRSF14|ADAM17|WNT5A|YTHDF3|OXSR1|PADI2|CSF3R|PLVAP|USP27X|AZI2|CCL19|CCR2|CCR6|GIGYF2|CD4|CD…	552	GOBP_CYTOKINE_MEDIATED_SIGNALING_PATHWAY	-1.8023	0	GOBP_CYTOKINE_MEDIATED_SIGNALING_PATHWAY	CYTOKINE MEDIATED SIGNALING PATHWAY
Cytokine & Interleukin Production	3.39794	-3.39794	-0.4386	0.0069	HLA-A|SYK|TNFSF4|IL18|LAPTM5|LILRB4|TICAM1|TLR3|SLAMF1|TLR4|TLR7|APOA1|TLR9|KIR2DL4|IL1B|DHX36|INAVA|AXL|IRAK3|TRAF6|APOA2|LITAF|MIF|IRF5|KIT|TRIM6|UBE2J1|TRIL|ARID5A|CALHM6|LACC1|MIR302A|MAPKAPK2|MYD88|BCL10|BCL6|TGFB1|TGFB2|TGFB3|HK1|BTK|BST2|MALT1|MAP3K7|SEMA7A|SIRT1|MAVS|ANGPT1|PANX1|IL10|ATG5|TNFRSF14|TWIST1|WNT5A|IL18R1|IL1R1|IL21|B2M|IL4|XCL1|CD160|PRG2|CAMK4|CD226|JAK3|CARD9|CCR2|NLRP3|NL…	130	GOBP_CYTOKINE_PRODUCTION_INVOLVED_IN_IMMUNE_RESPONSE	-1.8504	0.0004	GOBP_CYTOKINE_PRODUCTION_INVOLVED_IN_IMMUNE_RESPONSE	CYTOKINE PRODUCTION INVOLVED IN IMMUNE RESPONSE
Cytokine & Interleukin Production	3.52288	-3.52288	-0.4946	0.0055	HMGB1|STAT3|STMP1|IGF1|GHSR|IFI16|LGALS9|LILRB4|CARD16|CARD17P|IFNG|CARD18|AZU1|TLR4|TLR6|APOA1|TLR8|ISL1|TNFAIP3|JAK2|ERRFI1|INAVA|SMAD3|LILRA5|TREM2|MIR204|ZC3H12A|MIR195|MIR206|CD33|MIR361|AIM2|MYD88|PML|USP50|APP|MIR766|ARRB2|LILRA2|NLRP2|HK1|LPL|MALT1|MIR101-1|NLRP7|MIR144|MEFV|MIR181A2|MIR181D|MIR27B|PANX1|IL17A|CCR7|ELF4|WNT5A|MIR708|ARG2|TYROBP|CARD8|NAIP|CASP1|EGR1|CCL19|HSPB1|NLRC4|NLRP…	113	GOBP_INTERLEUKIN_1_BETA_PRODUCTION	-1.8948	0.0003	GOBP_INTERLEUKIN_1_BETA_PRODUCTION	INTERLEUKIN 1 BETA PRODUCTION
Cytokine & Interleukin Production	2.3098	-2.3098	-0.3853	0.044	HAVCR2|HMGB1|STAT3|GHSR|SYK|TNFSF4|HSPD1|IL17RC|LAPTM5|LGALS9|IL1RAP|LILRB4|MBP|IFIH1|IL1RL2|TICAM1|IFNG|TSLP|IL36A|TLR1|IL37|TLR2|TLR3|SLAMF1|TLR4|HYAL2|TLR6|TLR7|TLR8|ISL1|TLR9|TNFAIP3|IL1B|ADORA2B|INAVA|INPP5D|NMB|NMBR|IRAK3|TRAF6|EREG|LILRA5|TREM2|MIR204|ZC3H12A|MAPK13|MIR195|MIR206|ARID5A|MIR19B1|ARHGEF2|SYT11|MIR361|POU2AF1|UNC93B1|MAPKAPK2|ARRB1|HGF|MYD88|APP|MIR6869|LBP|MIR766|ARRB2|TIRAP…	177	GOBP_INTERLEUKIN_6_PRODUCTION	-1.6525	0.0049	GOBP_INTERLEUKIN_6_PRODUCTION	INTERLEUKIN 6 PRODUCTION
Cytokine & Interleukin Production	3.04576	-3.04576	-0.4495	0.0125	HAVCR2|HMGB1|STAT3|STMP1|IGF1|GHSR|IFI16|LGALS9|LILRB4|CARD16|CARD17P|IFNG|MIR181C|CARD18|AZU1|IGHD|TLR4|ANXA1|TLR6|APOA1|TLR8|ISL1|TNFAIP3|JAK2|ERRFI1|INAVA|SMAD3|CALCA|LILRA5|TREM2|MIR204|ZC3H12A|MIR195|MIR206|PANX2|CD33|MIR361|AIM2|MYD88|PML|USP50|APP|MIR766|ARRB2|LILRA2|NLRP2|HK1|LPL|MALT1|MIR101-1|NLRP7|MIR142|MIR144|MEFV|MIR181A2|MIR181D|MIR27B|PANX1|PANX3|IL10|GAS6|IL17A|CCR7|ELF4|TMED10|W…	133	GOBP_INTERLEUKIN_1_PRODUCTION	-1.7923	0.0009	GOBP_INTERLEUKIN_1_PRODUCTION	INTERLEUKIN 1 PRODUCTION
Cytokine & Interleukin Production	2.40894	-2.40894	-0.4273	0.0378	HAVCR2|HMGB1|HLA-A|HLA-DPB1|IFNL1|HLA-DRB1|IL12B|PGLYRP1|TNFSF4|IL12RB1|PGLYRP2|HMSD|IL18|PGLYRP3|IL2|IL23A|IL23R|IL12RB2|HSPD1|LAPTM5|LGALS9|LILRB4|HRAS|ZP3|PDCD1LG2|PRNP|RIPK3|SCRIB|TLR3|SLAMF1|TLR4|ISG15|TLR7|TLR8|ISL1|TLR9|JAK2|IL1B|CD2|CEBPG|AXL|IRGM|ZC3H12A|INHA|ARID5A|MIR24-1|TXK|KLRC4-KLRK1|KLRK1|APP|UFSP2|ZNF683|BTN3A2|C1QBP|TRIM27|IL10|GAS6|IL12A|CCR7|WNT5A|CD47|IL18R1|TYK2|MIR708|IL1R1…	123	GOBP_TYPE_II_INTERFERON_PRODUCTION	-1.687	0.0039	GOBP_TYPE_II_INTERFERON_PRODUCTION	TYPE II INTERFERON PRODUCTION
Cytokine & Interleukin Production	3.1549	-3.1549	-0.5158	0.0109	CARD8|NAIP|CASP1|HAVCR2|HMGB1|EGR1|STAT3|STMP1|IL16|CCL19|HSPB1|NLRC4|NLRP1|NLRP10|IFI16|LGALS9|NLRP3|IFNG|HDAC2|AZU1|NOD1|IGHD|NOD2|TLR4|TLR6|TLR8|ISL1|CD36|JAK2|INAVA|SMAD3|CALCA|LILRA5|CLEC7A|TRIM16|MIR206|PANX2|P2RX7|CASP8|FZD5|AIM2|NLRP12|PYDC1|TNF|MYD88|USP50|APP|S100A13|LILRA2|NLRP2|RELA|TMEM106A|HK1|RIPK2|LPL|F2RL1|MALT1|PYCARD|MIR144|IL6|MEFV|CCL3|ORM1|PANX1|ORM2|AGER|PANX3|GBP5|GSDMD|IL…	74	GOBP_POSITIVE_REGULATION_OF_INTERLEUKIN_1_PRODUCTION	-1.843	0.0007	GOBP_POSITIVE_REGULATION_OF_INTERLEUKIN_1_PRODUCTION	POSITIVE REGULATION OF INTERLEUKIN 1 PRODUCTION
Cytokine & Interleukin Production	4	-4	-0.3731	0.0003	DICER1|SIGIRR|STAT3|MIR203A|TNFSF4|ABCD1|SRGN|YY1|ERRFI1|EZH2|MACIR|ZC3H12A|ZFP36|MIR130A|MIR15B|MIR16-1|MIR19B1|CRYBA1|MIR221|MIR222|PML|PTPN11|QKI|C1QTNF3|TGFB1|FBLN1|TGFB2|TGFB3|TRAIP|GATA6|TSPO|WNT11|SIGLEC1|GPNMB|MIR181A2|MIR181D|MIR302C|THBS1|HDAC7|MIR338|HDAC9|TRIM27|TWIST1|ADCY7|AKAP8|ARG2|HMOX1|NAV3|TYROBP|BCL3|BPI|XAF1|CD200|HOMER2|CD84|SERPINB1|CD96|CLEC4A|CHID1|EXTL3|CX3CR1|KLF2|GBA1|…	400	GOBP_NEGATIVE_REGULATION_OF_CYTOKINE_PRODUCTION	-1.7886	0	GOBP_NEGATIVE_REGULATION_OF_CYTOKINE_PRODUCTION	NEGATIVE REGULATION OF CYTOKINE PRODUCTION
Cytokine & Interleukin Production	2.25181	-2.25181	-0.4195	0.048	B2M|IL4|XCL1|HLA-A|CD160|SYK|TNFSF4|CAMK4|CD226|IL18|CARD9|LAPTM5|NLRP3|TICAM1|NOD1|SLC7A5|NOD2|CD55|CD7|LILRB1|TLR3|CD74|SLAMF1|TLR4|HTR2A|CD81|NR4A3|TLR7|CD36|KIR2DL4|IL1B|DHX36|INAVA|CLNK|TRAF6|SPON2|CLEC7A|MIF|PLCG2|IRF5|KIT|TRIM6|DDX1|DDX21|GPRC5B|ARID5A|P2RX7|FZD5|PRKCZ|LACC1|MAPKAPK2|DENND1B|MYD88|RAET1G|BCL10|HLA-F|HLA-G|RIGI|SASH3|FFAR3|HK1|RIPK2|SECTM1|FCER1G|HLA-E|F2RL1|MALT1|PYCARD|MA…	88	GOBP_POSITIVE_REGULATION_OF_CYTOKINE_PRODUCTION_INVOLVED_IN_IMMUNE_RESPONSE	-1.639	0.0056	GOBP_POSITIVE_REGULATION_OF_CYTOKINE_PRODUCTION_INVOLVED_IN_IMMUNE_RESPONSE	POSITIVE REGULATION OF CYTOKINE PRODUCTION INVOLVED IN IMMUNE RESPONSE
Cytokine & Interleukin Production	4	-4	-0.3063	0	SIGIRR|SPN|STAT3|TNFSF4|ABCD1|FERMT1|IL17B|IL26|HIF1A|HTR2B|HYAL2|YY1|ISL1|DHX36|EZH2|MIR324|MACIR|ZC3H12A|ZFP36|MIR130A|MIR15B|MIR16-1|ARID5A|MIR19B1|CRYBA1|MIR221|PANX2|MIR222|MAPK14|MAPKAPK2|MYD88|PML|PTPN11|QKI|RBM47|TIRAP|C1QTNF3|FBLN1|LPL|RORA|SIGLEC1|SEMA7A|SIRT1|XBP1|SNAI2|TRIM38|THBS1|DDT|GPSM3|TNFRSF14|ADAM17|TWIST1|ADCY7|WNT5A|AIRE|AKIRIN2|AKAP8|ARG2|ZNF580|B2M|AFAP1L2|BATF|ITGB6|BCL3|…	909	GOBP_CYTOKINE_PRODUCTION	-1.6499	0	GOBP_CYTOKINE_PRODUCTION	CYTOKINE PRODUCTION
Cytokine & Interleukin Production	3.04576	-3.04576	-0.4695	0.0128	HMGB1|LAMTOR5|STAT3|SYK|MIR203A|MIRLET7C|HSPA1A|HSPA1B|LGALS9|PRG3|MIR93|TLR1|TLR2|TLR3|TLR4|TLR5|ANXA1|HYAL2|TLR6|TLR7|TLR8|TLR9|IL1B|CD2|CALCA|APOA2|MIR204|CD33|MAPKBP1|CAMP|ARRB1|MYD88|LBP|MIR766|TIRAP|LILRA2|RIPK1|BCL10|MIR106A|MIR520C|CHI3L1|MAVS|MIR181A2|MIR129-1|MIR302C|MIR146A|IL10|LEP|IL17F|WNT5A|C5AR2|MIR520B|CACTIN|ZNF580|AFAP1L2|BCL3|CD14|ADIPOQ|BPI|NLRP10|MIR100|DEFA5|CD244|NOD1|NOD2…	105	GOBP_INTERLEUKIN_8_PRODUCTION	-1.7998	0.0009	GOBP_INTERLEUKIN_8_PRODUCTION	INTERLEUKIN 8 PRODUCTION
Cytokine & Interleukin Production	4	-4	-0.3128	0.0028	SPN|STAT3|ROCK2|TNFSF4|FERMT1|SERPINF2|IL17B|IL26|HIF1A|HTR2B|EIF2AK3|HYAL2|ISL1|ATF2|DHX36|SMAD3|MIR324|EREG|SPTBN1|ARID5A|PANX2|MAPK14|MAPKAPK2|FLT4|MYD88|PTPN11|TNFRSF8|RBM47|TIRAP|C1QTNF3|TGFB1|LPL|MDK|GLMN|WNT11|RORA|SEMA7A|SIRT1|XBP1|THBS1|DDT|TRIM27|GPSM3|TRIM32|TNFRSF14|ADAM17|TWIST1|WNT5A|TRPV4|AIRE|AKIRIN2|HMOX1|TYROBP|ZNF580|B2M|AFAP1L2|BATF|BCL3|HPSE|CAMK4|CARD9|CCL19|CCR2|HSPB1|CCDC8…	519	GOBP_POSITIVE_REGULATION_OF_CYTOKINE_PRODUCTION	-1.5978	0.0001	GOBP_POSITIVE_REGULATION_OF_CYTOKINE_PRODUCTION	POSITIVE REGULATION OF CYTOKINE PRODUCTION
Cytokine & Interleukin Production	2.58503	-2.58503	-0.4736	0.0277	HAVCR2|BCL3|HLA-A|CD14|HLA-DPB1|CD160|IFNL1|IL12B|TNFSF4|IL12RB1|CD226|HMSD|IL18|IL2|CD276|IL23A|CCR2|IL23R|IL12RB2|HSPD1|LGALS9|HRAS|CD3E|ZP3|CD244|SLC7A5|LILRB1|SCRIB|TLR3|SLAMF1|TLR4|ZFPM1|ISG15|TLR7|LTA|TLR8|ISL1|TLR9|JAK2|IL1B|CD2|CEBPG|CLEC7A|CYRIB|EBI3|ARID5A|TXK|KLRC4-KLRK1|PTPN22|FZD5|KLRK1|PDE4B|TNF|PDE4D|APP|HLA-DPA1|SASH3|RIPK2|HMHB1|F2RL1|PYCARD|BTN3A2|SLAMF6|SLC11A1|IRF8|TRIM27|IL12…	78	GOBP_POSITIVE_REGULATION_OF_TYPE_II_INTERFERON_PRODUCTION	-1.692	0.0026	GOBP_POSITIVE_REGULATION_OF_TYPE_II_INTERFERON_PRODUCTION	POSITIVE REGULATION OF TYPE II INTERFERON PRODUCTION
DNA Repair & Homologous Recombination	4	4	0.3839	0.0004	ASTE1|BRD8|ACTR2|NSMCE2|PRMT1|ZFYVE26|CTBP1-DT|WDR48|XRCC2|YY1|EID3|EXD2|POGZ|FAN1|BRCA2|FANCB|CHEK1|GINS2|DMC1|HELB|HELQ|GINS4|HROB|HTATSF1|RAD21L1|RAD50|KLHL15|RAD51|RAD51AP1|RAD51C|RAD51D|MAGEF1|RAD54B|RAD54L|MCM5|RAD51B|MCM8|RBBP8|MCM9|MMS22L|RECQL5|RFWD3|TRRAP|RHNO1|DMAP1|RMI2|NSMCE1|ZMYND8|NSMCE4A|RPA4|REC8|RTEL1|PARPBP|POLN|ANKLE1|PPP4C|PPP4R2|VPS72|EP400|EPC1|PSMD14|SLF1|EPC2|SLF2|AUNIP|S…	193	GOBP_RECOMBINATIONAL_REPAIR	1.7948	0	GOBP_RECOMBINATIONAL_REPAIR	RECOMBINATIONAL REPAIR
DNA Repair & Homologous Recombination	3.22185	3.22185	0.4463	0.0093	IL4|BRD8|TFRC|ACTR2|TNFSF4|PRMT1|IL2|VPS72|CD28|EP400|EPC1|KMT5B|EPC2|KMT5C|ACTL6A|OOEP|YEATS4|ERCC6|CD40|WDR48|ZCWPW1|CLCF1|MBTD1|PARP1|MLH1|MEAF6|PELI1|MSH2|NBN|ERCC2|KHDC3L|NSD2|FANCB|PRDM9|TIMELESS|PAXIP1|EXOSC3|EXOSC6|CREBBP|MORF4L1|MORF4L2|PMS2|MRGBP|PTPRC|MAD2L2|FUS|HELQ|RIF1|RAD51AP1|RNF8|TGFB1|ARID2|HMCES|SHLD1|SHLD2|SHLD3|TRRAP|MRNIP|RNF126|DMAP1|STAT6|RUVBL1|UBE2B|ING3|RUVBL2|TBX21|WAS…	76	GOBP_POSITIVE_REGULATION_OF_DNA_RECOMBINATION	1.7991	0.0006	GOBP_POSITIVE_REGULATION_OF_DNA_RECOMBINATION	POSITIVE REGULATION OF DNA RECOMBINATION
DNA Repair & Homologous Recombination	3.52288	3.52288	0.4216	0.006	BRD8|ACTR2|PRMT1|CYREN|WDR48|ZCWPW1|ACTL6B|DDX11|MBTD1|MEAF6|MGMT|DPF3|KHDC3L|SPIRE1|SPIRE2|FANCB|KDM4D|ARID1A|ARID1B|BRD7|MORF4L1|MORF4L2|MRE11|MRGBP|UBE2N|MAD2L2|FUS|SPIDR|HELQ|RAD50|RAD51AP1|FOXM1|TRRAP|DMAP1|SIRT1|PNKP|DPF1|HDGFL2|DPF2|PBRM1|PHF10|KAT5|PIAS4|SMARCA2|SMARCC2|SMARCD1|SMARCD2|SMARCE1|SETMAR|VPS72|EP400|EPC1|KMT5B|SLF1|EPC2|KMT5C|SLF2|ACTL6A|OOEP|YEATS4|BCL7A|ERCC6|PARP1|PELI1|NB…	98	GOBP_POSITIVE_REGULATION_OF_DOUBLE_STRAND_BREAK_REPAIR	1.7991	0.0003	GOBP_POSITIVE_REGULATION_OF_DOUBLE_STRAND_BREAK_REPAIR	POSITIVE REGULATION OF DOUBLE STRAND BREAK REPAIR
DNA Repair & Homologous Recombination	4	4	0.3651	0	ASTE1|ATP23|BRD8|ACTR2|NSMCE2|PRMT1|ZFYVE26|CYREN|WDR48|DCLRE1B|DEK|XRCC2|YY1|DNTT|EID3|ACTL6B|CSNK2A2|ERCC8|EXD2|HMGA2|SPIRE1|POGZ|SPIRE2|FAN1|POLA1|BRCA2|FANCB|CHEK1|EYA1|ARID1A|CHEK2|ARID1B|MIR221|BRD7|GGN|TFIP11|GINS2|DMC1|HELB|HELQ|PML|GINS4|HPF1|HTATSF1|TENT4A|RAD21L1|KDM2A|RAD50|KLHL15|RAD51|RAD51AP1|RAD51C|RAD51D|MAGEF1|RAD54B|RAD54L|PRPF19|PPP4R3A|MCM5|PPP4R3B|RAD51B|MCM8|RBBP8|MCM9|MMS2…	325	GOBP_DOUBLE_STRAND_BREAK_REPAIR	1.8103	0	GOBP_DOUBLE_STRAND_BREAK_REPAIR	DOUBLE STRAND BREAK REPAIR
DNA Repair & Homologous Recombination	2.26761	2.26761	0.4146	0.0472	HMGB1|IL4|BATF|TFRC|TNFSF4|NFKBIZ|IL2|CD28|CCR6|HSPD1|KMT5B|KMT5C|XRCC4|LEF1|LIG4|CD40|CYREN|CD40LG|ADAR|YY1|CLCF1|MLH1|CTNNBL1|MSH2|SAMHD1|MSH6|DCAF1|NBN|ATM|NDFIP1|DCLRE1C|NSD2|PARP3|ERCC1|PAXIP1|EXO1|PCYT1A|POLB|EXOSC3|EXOSC6|NHEJ1|PMS2|PRKDC|POLM|RAG2|PTPRC|MAD2L2|SWAP70|TCF3|RAG1|RIF1|RNF168|HMGB2|RNF8|BCL6|TGFB1|SANBR|HMCES|SHLD1|SHLD2|SHLD3|LIG1|LIG3|MSH3|STAT6|SUPT6H|POLL|TBX21|MCM3AP|POL…	81	GOBP_SOMATIC_DIVERSIFICATION_OF_IMMUNE_RECEPTORS	1.6634	0.0054	GOBP_SOMATIC_DIVERSIFICATION_OF_IMMUNE_RECEPTORS	SOMATIC DIVERSIFICATION OF IMMUNE RECEPTORS
DNA Repair & Homologous Recombination	4	4	0.3351	0	ATXN7L3|TFRC|C11ORF54|TNFSF4|DUSP1|CCDC117|UCHL5|E2F7|E2F8|CYREN|WDR48|DEK|YY1|EID3|CCNA2|TAF6|TAF9|DHX36|ERCC8|HNRNPD|TNKS|TNKS2|EXOSC10|HMGA2|ERCC2|PCNA|EREG|TFPT|SPIRE1|SPIRE2|FANCB|UPF1|FGFR4|EYA1|EYA2|SRC|MIR221|TMEM161A|CCT2|CCT3|TFDP1|CCT4|CCT5|HNRNPC|CCT7|CCT8|HELB|HELQ|PML|TCP1|TENT4B|KLHL15|TGFB1|MAGEF1|MARCHF6-DT|PPP4R3A|MCM5|PPP4R3B|GATA5|SIRT7|GLI2|MSH3|TRRAP|SIRT1|TNFAIP1|UBE2B|NSMC…	498	GOBP_REGULATION_OF_DNA_METABOLIC_PROCESS	1.7319	0	GOBP_REGULATION_OF_DNA_METABOLIC_PROCESS	REGULATION OF DNA METABOLIC PROCESS
DNA Repair & Homologous Recombination	3.30103	3.30103	0.3276	0.0084	USP1|ATXN7L3|BRD8|NFRKB|ACTR2|C11ORF54|PRMT1|CCDC117|UCHL5|CYREN|WDR48|DEK|ATXN7|YY1|TAF6|ACTL6B|HDAC10|TAF9|ERCC8|HMGA2|PCNA|TFPT|SPIRE1|SPIRE2|FANCB|TRIM28|CHEK1|EYA1|EYA2|ARID1A|ARID1B|MIR221|TMEM161A|BRD7|SUV39H1|TFIP11|TERF2|HELB|HELQ|PML|CUL4A|RAD50|KLHL15|RAD51|RAD51AP1|MAGEF1|MARCHF6-DT|PPP4R3A|PPP4R3B|SIRT7|RECQL5|KAT7|TRRAP|DMAP1|RMI2|SIRT1|NUDT16L1|DPF1|DPF2|PBRM1|PHF10|RTEL1|TWIST1|PA…	234	GOBP_REGULATION_OF_DNA_REPAIR	1.5713	0.0005	GOBP_REGULATION_OF_DNA_REPAIR	REGULATION OF DNA REPAIR
DNA Repair & Homologous Recombination	3.22185	3.22185	0.3157	0.0092	USP1|BRD8|NFRKB|TFRC|ACTR2|TNFSF4|PRMT1|HSP90AA1|CCDC117|UCHL5|E2F7|E2F8|CYREN|WDR48|YY1|CCNA2|MAPK15|ACTL6B|HDAC10|DHX36|ERCC8|HNRNPD|TNKS|TNKS2|ERCC2|PCNA|EREG|TFPT|CDKN1A|SPIRE1|CDKN1B|SPIRE2|FANCB|TRIM28|FGFR4|EYA1|EYA2|ARID1A|ARID1B|TMEM161A|BRD7|TERF2|CCT2|CCT3|CCT4|CCT5|CCT7|CCT8|PTK6|HELQ|PML|TCP1|RAD50|NPM2|RAD51AP1|FGFR1|TGFB1|MARCHF6-DT|GATA5|GLI2|MAPK1|KAT7|TRRAP|DMAP1|SIRT1|TNFAIP1|U…	283	GOBP_POSITIVE_REGULATION_OF_DNA_METABOLIC_PROCESS	1.5393	0.0006	GOBP_POSITIVE_REGULATION_OF_DNA_METABOLIC_PROCESS	POSITIVE REGULATION OF DNA METABOLIC PROCESS
DNA Repair & Homologous Recombination	4	4	0.3568	0.0001	ASTE1|BRD8|NFRKB|TFRC|ACTR2|H1-0|NSMCE2|TNFSF4|H1-1|H1-10|PRMT1|H1-2|H1-3|H1-4|H1-5|UCHL5|H1-6|HSPD1|ZFYVE26|CTBP1-DT|CYREN|WDR48|XRCC2|PAGR1|YY1|SUPV3L1|SYCE3|EID3|HDAC10|EXD2|TEX11|ERCC2|TFPT|POGZ|FAN1|BRCA2|FANCB|CHEK1|GINS2|TERF2|PSMC3IP|DMC1|SWAP70|HELB|HELQ|PIF1|GINS4|HROB|HTATSF1|RAD21L1|KIN|RAD50|KLHL15|RAD51|RAD51AP1|BCL6|RAD51C|RAD51D|TGFB1|MAGEF1|RAD54B|RAD54L|MCM5|RAD51B|MCM8|RBBP8|MC…	346	GOBP_DNA_RECOMBINATION	1.762	0	GOBP_DNA_RECOMBINATION	DNA RECOMBINATION
DNA Repair & Homologous Recombination	3.52288	3.52288	0.3854	0.0046	HMGB1|USP1|BRD8|NFRKB|ACTR2|PRMT1|CCDC117|UCHL5|CYREN|WDR48|ZCWPW1|RPS3|EGFR|YY1|ACTL6B|HDAC10|DDX11|MBTD1|ERCC8|MEAF6|CEBPG|PCNA|MGMT|TFPT|DPF3|KHDC3L|SPIRE1|SPIRE2|FANCB|TRIM28|KDM4D|EYA1|EYA2|ARID1A|ARID1B|TMEM161A|BRD7|MORF4L1|MORF4L2|MRE11|MRGBP|UBE2N|MAD2L2|FUS|SPIDR|HELQ|RAD50|RAD51AP1|MARCHF6-DT|BRCC3|FOXM1|FAM168A|TRRAP|DMAP1|SIRT1|H2AX|PNKP|DPF1|HDGFL2|DPF2|PBRM1|CBX8|PHF10|TIGAR|KAT5|P…	142	GOBP_POSITIVE_REGULATION_OF_DNA_REPAIR	1.7209	0.0003	GOBP_POSITIVE_REGULATION_OF_DNA_REPAIR	POSITIVE REGULATION OF DNA REPAIR
DNA Repair & Homologous Recombination	4	4	0.3935	0.0015	USP51|BRD8|ACTR2|PRMT1|CYREN|WDR48|ZCWPW1|DEK|ZNF365|ACTL6B|DDX11|MBTD1|MEAF6|HMGA2|MGMT|DPF3|KHDC3L|SPIRE1|SPIRE2|FANCB|KDM4D|CHEK1|ARID1A|ARID1B|MIR221|BRD7|MORF4L1|TFIP11|MORF4L2|MRE11|MRGBP|UBE2N|MAD2L2|FUS|HELB|SPIDR|HELQ|PML|RAD50|KLHL15|RAD51|RAD51AP1|MAGEF1|PPP4R3A|PPP4R3B|FOXM1|RECQL5|TRRAP|DMAP1|RMI2|SIRT1|C1QBP|OGG1|PNKP|NUDT16L1|POLQ|DPF1|HDGFL2|DPF2|PBRM1|RPA2|PHF10|RTEL1|TWIST1|CSNK…	148	GOBP_REGULATION_OF_DOUBLE_STRAND_BREAK_REPAIR	1.7706	0.0001	GOBP_REGULATION_OF_DOUBLE_STRAND_BREAK_REPAIR	REGULATION OF DOUBLE STRAND BREAK REPAIR
DNA Repair & Homologous Recombination	2.38722	2.38722	0.47	0.0394	BRD8|ACTR2|FUS|HELQ|PRMT1|VPS72|EP400|EPC1|EPC2|ACTL6A|OOEP|RAD51AP1|RNF8|YEATS4|ERCC6|WDR48|ARID2|TRRAP|MBTD1|MRNIP|PARP1|RNF126|MEAF6|PELI1|DMAP1|RUVBL1|ING3|NBN|RUVBL2|KHDC3L|WAS|FANCB|HDGFL2|TIMELESS|WRAP53|KAT5|CREBBP|MORF4L1|MORF4L2|ACTB|SKP2|MRGBP|PIAS4	43	GOBP_POSITIVE_REGULATION_OF_DOUBLE_STRAND_BREAK_REPAIR_VIA_HOMOLOGOUS_RECOMBINATION	1.733	0.0041	GOBP_POSITIVE_REGULATION_OF_DOUBLE_STRAND_BREAK_REPAIR_VIA_HOMOLOGOUS_RECOMBINATION	POSITIVE REGULATION OF DOUBLE STRAND BREAK REPAIR VIA HOMOLOGOUS RECOMBINATION
DNA Repair & Homologous Recombination	4	4	0.4273	0.0013	USP51|BRD8|TFRC|ACTR2|H1-0|TNFSF4|H1-1|H1-10|PRMT1|H1-2|IL2|H1-3|H1-4|H1-5|H1-6|WDR48|ZCWPW1|ZNF365|MBTD1|KPNA2|MEAF6|ERCC2|KHDC3L|FANCB|CHEK1|MORF4L1|MORF4L2|MRE11|TERF2|MRGBP|MAD2L2|FUS|HELB|SPIDR|HELQ|RAD50|KLHL15|RAD51|RAD51AP1|BCL6|TGFB1|MAGEF1|RECQL5|MSH3|TRRAP|DMAP1|H1-8|RMI2|C1QBP|UBE2B|POLQ|HDGFL2|IL10|RPA2|RTEL1|CSNK2A1|PARPBP|KAT5|APLF|IL27RA|ATAD5|PIAS4|IL4|PLK1|IL7R|ANKLE1|PPP4C|PPP4…	141	GOBP_REGULATION_OF_DNA_RECOMBINATION	1.8682	0.0001	GOBP_REGULATION_OF_DNA_RECOMBINATION	REGULATION OF DNA RECOMBINATION
DNA Repair & Homologous Recombination	2.76955	2.76955	0.4156	0.0203	PLK1|USP51|BRD8|ACTR2|PPP4C|PPP4R2|PRMT1|VPS72|EP400|EPC1|EPC2|ACTL6A|OOEP|RADX|YEATS4|ERCC6|WDR48|ZNF365|SETD2|MBTD1|PARP1|MEAF6|PELI1|FBH1|CGAS|NBN|KMT5A|FIGNL1|KHDC3L|FANCB|SENP3|TIMELESS|CHEK1|CREBBP|MORF4L1|MORF4L2|SMCHD1|MRGBP|KDM1A|TEX15|MAD2L2|FUS|HELB|SPIDR|HELQ|RIF1|KLHL15|RAD51|RAD51AP1|RNF8|UBQLN4|TERF2IP|MAGEF1|ARID2|SHLD1|SHLD2|SHLD3|RECQL5|TRRAP|MRNIP|RNF126|DMAP1|RMI2|C1QBP|RUVBL1…	82	GOBP_REGULATION_OF_DOUBLE_STRAND_BREAK_REPAIR_VIA_HOMOLOGOUS_RECOMBINATION	1.7217	0.0017	GOBP_REGULATION_OF_DOUBLE_STRAND_BREAK_REPAIR_VIA_HOMOLOGOUS_RECOMBINATION	REGULATION OF DOUBLE STRAND BREAK REPAIR VIA HOMOLOGOUS RECOMBINATION
DNA Replication & Initiation	4	4	0.3546	0.0002	NFRKB|BOD1L1|ADRA2A|UCHL5|CHAF1A|CHAF1B|E2F7|E2F8|CARM1|ORC1|ORC4|WRNIP1|YY1|PCLAF|CCNA2|PDS5A|GRWD1|EXD2|PCNA|EREG|TFPT|CDKN1A|FAM111A|CDKN1B|POLA1|TOP1|BRCA2|UPF1|CHEK1|GINS2|PURA|TERF2|HELB|PTK6|GINS1|GINS4|FBXO5|RAD17|KIN|NASP|RAD50|RAD51|NPM2|BCL6|FGFR1|SSRP1|SUPT16H|MCM10|MCM5|MCM8|RBBP8|TRAIP|MCM9|MGME1|MMS22L|RECQL5|GLI2|KAT7|RFWD3|LRWD1|RMI2|TNFAIP1|RPA4|NYNRIN|METTL4|RTEL1|RTF2|AICDA|NA…	277	GOBP_DNA_REPLICATION	1.7347	0	GOBP_DNA_REPLICATION	DNA REPLICATION
DNA Replication & Initiation	4	4	0.426	0.0011	USP37|NFRKB|WAPL|UCHL5|WEE1|WIZ|E2F7|E2F8|EGFR|WRNIP1|DBF4|YY1|DBF4B|CCNA2|PDS5A|MCM2|MEAF6|PCNA|EREG|KCTD13|SMARCA5|TFPT|CDKN1A|CDKN1B|DSCC1|GMNN|ESCO1|ESCO2|PTK6|ANKRD17|FBXO5|RAD17|NPM2|BCL6|FGFR1|MCM5|DNA2|ID3|GLI2|NUGGC|GMNC|KAT7|LIG3|UCN|NUCKS1|TNFAIP1|METTL4|AICDA|CDT1|TP53|S100A11|ENDOG|SENP2|ATAD5|CDK2|ACTR5|ACTR8|POLE3|INO80|INO80B|INO80C|EHMT2|INO80D|ACVRL1|INO80E|ATR|CTC1|JADE2|ACTL6A…	119	GOBP_REGULATION_OF_DNA_REPLICATION	1.8496	0	GOBP_REGULATION_OF_DNA_REPLICATION	REGULATION OF DNA REPLICATION
DNA Replication & Initiation	3.04576	3.04576	0.5083	0.0129	MCM3|MCM4|MCM6|INO80|GINS1|ZMPSTE24|FBXO5|TIPIN|CDC45|CDC7|WIZ|E2F7|E2F8|RAD51|BCL6|FGFR1|BLM|DBF4|DNA2|DBF4B|FEN1|RECQL5|ZNF830|GINS3|LIG1|NUGGC|ZPR1|DACH1|TK1|ATRX|MCM2|PCNA|DONSON|RPA4|POLA1|BRCA2|UPF1|RTEL1|RTF2|WRN|AICDA|CDT1|SENP2|GMNN|TERF2|ATAD5|TERF1	47	GOBP_CELL_CYCLE_DNA_REPLICATION	1.8994	0.0009	GOBP_CELL_CYCLE_DNA_REPLICATION	CELL CYCLE DNA REPLICATION
DNA Replication & Initiation	2.26761	2.26761	0.484	0.0472	MCIDAS|MCM3|MCM4|MCM6|INO80|ZMPSTE24|TICRR|FBXO5|TIPIN|CDC7|WIZ|E2F7|E2F8|BCL6|FGFR1|MCM5|WRNIP1|DBF4|DBF4B|MCM7|DYNLL1|SSBP1|NUGGC|GMNC|KAT7|LIG3|DACH1|ATRX|MCM2|NBN|AGER|METTL4|TIMELESS|SLFN11|CAMSAP3|CIZ1|AICDA|CDT1|ENDOG|SENP2|GMNN|CDK2	42	GOBP_REGULATION_OF_DNA_TEMPLATED_DNA_REPLICATION	1.7408	0.0054	GOBP_REGULATION_OF_DNA_TEMPLATED_DNA_REPLICATION	REGULATION OF DNA TEMPLATED DNA REPLICATION
DNA Replication & Initiation	3.04576	3.04576	0.6618	0.0121	GINS3|LIG1|MCM3|MCM4|TK1|MCM2|MCM6|GINS1|ZMPSTE24|CDC45|POLA1|BRCA2|RAD51|BCL6|FGFR1|RTF2|RECQL5	17	GOBP_MITOTIC_DNA_REPLICATION	1.9381	0.0009	GOBP_MITOTIC_DNA_REPLICATION	MITOTIC DNA REPLICATION
DNA Replication & Initiation	4	4	0.4049	0.0003	ZRANB3|BOD1L1|WDHD1|WIZ|E2F7|E2F8|CARM1|RRM1|ORC1|ORC4|WRNIP1|DBF4|ZNF365|DBF4B|DNAJA3|DDX11|TK1|MCM2|EXD2|PCNA|DONSON|FAM111A|KHDC3L|POLA1|BRCA2|UPF1|EME1|EME2|GMNN|PURA|MRE11|POLD3|TERF2|HELB|ETAA1|GINS1|GINS4|FBXO5|RAD50|FANCM|RAD51|BCL6|FGFR1|MCM10|MCM5|MCM8|RBBP8|TRAIP|MCM9|DNA2|MGME1|FEN1|GEN1|MMS22L|RECQL5|TEFM|GINS3|LIG1|NUGGC|GMNC|KAT7|LIG3|RFWD3|NUCKS1|LRWD1|PNKP|POLD1|POLE|POLG|RPA4|NY…	161	GOBP_DNA_TEMPLATED_DNA_REPLICATION	1.8549	0	GOBP_DNA_TEMPLATED_DNA_REPLICATION	DNA TEMPLATED DNA REPLICATION
DNA Replication & Initiation	2.46852	2.46852	0.4963	0.0344	POLD2|ACTR5|ACTR8|MCM3|POLE3|MCM4|NFRKB|INO80|GINS1|INO80B|POT1|INO80C|MCRS1|INO80D|INO80E|UCHL5|RAD50|ACTL6A|DCLRE1B|DNA2|RFC3|YY1|MCM7|RFC4|TERT|LIG1|LIG3|NUCKS1|RUVBL1|NBN|RUVBL2|PCNA|POLE|TFPT|POLA1|MRE11|POLD3	37	GOBP_DNA_STRAND_ELONGATION	1.785	0.0034	GOBP_DNA_STRAND_ELONGATION	DNA STRAND ELONGATION
DNA Replication & Initiation	2.63827	2.63827	0.5071	0.025	MCIDAS|MCM3|MCM4|MCM6|TICRR|CDC34|CDC45|CDC6|NOC3L|ORC2|ORC3|ORC5|ORC6|TOPBP1|ORC1|POLA2|MCM10|ORC4|MCM5|PRIM1|PRIM2|WRNIP1|MCM7|GINS3|GMNC|KAT7|MCM2|LRWD1|NBN|RPA4|POLA1|CCNE1|CCNE2|CIZ1|CDT1|GMNN|PURA|CDK2	38	GOBP_DNA_REPLICATION_INITIATION	1.817	0.0023	GOBP_DNA_REPLICATION_INITIATION	DNA REPLICATION INITIATION
Epidermis & Keratinocyte Differentiation	4	-4	-0.6817	0.0009	KLK5|KRT6A|CYP26B1|TMEM79|CDH3|PPHLN1|KRT3|EVPL|CNFN|CASP14|HRNR|KRT4|IVL|KAZN|KRT6B|CERS3|KRT6C|KRTAP6-1|KRT7|KRTAP6-2|KRT71|KRTAP6-3|KRT72|LCE1A|KRT73|LCE1B|KRT74|LCE1C|KRT75|LCE1E|KRT76|LCE1F|KRT77|LCE2A|KRT16|KRT78|LCE2B|KRT2|KRT79|LCE2C|LCE3A|KRT80|LCE2D|LCE3B|SFN|KRT81|LCE3C|LCE3D|KRT82|LCE3E|KRT83|LCE4A|KRT85|LCE5A|KRT86|LCE6A|LCE7A|LORICRIN|SPRR1A|SPRR1B|SPRR2B|KRT84|SPRR2D|SPRR2E|SPRR2F|…	82	GOBP_KERATINIZATION	-2.1588	0	GOBP_KERATINIZATION	KERATINIZATION
Epidermis & Keratinocyte Differentiation	2.65758	-2.65758	-0.3376	0.0241	AKR1C3|IL20|ROCK2|TPRN|CDH3|WHRN|MYCL|VDR|WNT16|USH2A|SCEL|CASP14|OVOL1|YAP1|ANXA1|ERRFI1|EZH2|KRT16|MAFF|KRT2|ERCC2|EREG|CDKN1A|FGF20|KLF7|ZFP36|ZFP36L1|KRT1|OVOL2|LATS2|BCR|FGFR1|MAP2K1|GATA6|GDF3|GLI2|KRT5|TXNIP|GRHL2|HDAC1|HES5|TRIOBP|WDPCP|SLC44A4|WNT5A|HEY2|PKP1|USH1C|HOXA7|KLK5|KRT10|KRT14|NFKBIZ|TMEM79|PPHLN1|CLRN1|KRT3|ERCC3|HDAC2|EVPL|KRT36|SGPP1|GLI1|KRT4|KRT6B|CERS3|KRT6C|KRT7|MAFG|KR…	255	GOBP_EPIDERMAL_CELL_DIFFERENTIATION	-1.5625	0.0022	GOBP_EPIDERMAL_CELL_DIFFERENTIATION	EPIDERMAL CELL DIFFERENTIATION
Epidermis & Keratinocyte Differentiation	2.34679	-2.34679	-0.3686	0.0417	AKR1C3|IL20|ROCK2|KRT6A|CYP26B1|CDH3|MACROH2A1|FOXC1|VDR|WNT16|PPP3CA|CNFN|SCEL|ETV4|CASP14|EXPH5|NUMA1|FLG|HRNR|YAP1|ANXA1|IVL|KAZN|KRTAP6-1|KRTAP6-2|KRTAP6-3|LCE1A|LCE1B|LCE1C|LCE1E|ERRFI1|LCE1F|EZH2|LCE2A|KRT16|LCE2B|KRT2|LCE2C|LCE3A|LCE2D|LCE3B|LCE3C|LCE3D|LCE3E|EREG|LCE4A|LCE5A|CDKN1A|LCE6A|LCE7A|FOXN1|SPRR1A|SPRR1B|SPRR2B|EPHA2|SPRR2D|ZFP36|SPRR2E|ZFP36L1|SPRR2F|LATS1|SPRR2G|SPRR3|SPRR4|SPR…	179	GOBP_KERATINOCYTE_DIFFERENTIATION	-1.612	0.0045	GOBP_KERATINOCYTE_DIFFERENTIATION	KERATINOCYTE DIFFERENTIATION
Epidermis & Keratinocyte Differentiation	2.74473	-2.74473	-0.2974	0.0213	DKK1|LGR5|DKK4|ROCK2|TPRN|COL6A1|CDH3|FERMT1|MYCL|VDR|USH2A|EDA|EDAR|SCEL|WNT10A|CLDN1|ERRFI1|EZH2|SMAD4|ELOVL1|KRT16|MAFF|KRT2|LAMA5|ERCC2|EREG|PUM2|KLF7|ZFP36|ZFP36L1|PPARD|SRF|TFDP1|FGFR2|STMN1|OVOL2|TNFRSF19|FUZ|FZD3|FZD6|TGFB2|TRADD|INSR|MAP2K1|GATA6|GDF3|GLI2|KRT5|LDB2|SMO|TXNIP|GRHL2|ZDHHC21|SNAI1|SOX9|HDAC1|CALML5|HES5|TRIOBP|CYSRT1|WDPCP|SLC44A4|WNT5A|HEY2|PKP1|MYSM1|USH1C|VANGL2|HOXA7|H…	402	GOBP_EPIDERMIS_DEVELOPMENT	-1.4905	0.0018	GOBP_EPIDERMIS_DEVELOPMENT	EPIDERMIS DEVELOPMENT
Gamete generation	3.69897	3.69897	0.4075	0.0031	NOBOX|LGR5|IGF1|PAQR5|TRIM75|PAQR7|FUT6|PAQR8|ZFY|CTNNB1|SEBOX|MMP19|SOHLH1|SOHLH2|ZP3|ANG|ORC4|TNFAIP6|TAF4B|YTHDC2|AKT1|DCAF13|ZGLP1|HEXB|IMMP2L|ASPM|AURKA|PIWIL2|EDNRA|KASH5|EREG|SPIRE1|FOXL2|SPIRE2|BNC1|BRCA2|CGB3|CGB7|SRC|GPR149|NPPC|PTX3|MMP2|DAZL|METTL3|CDC25B|NANOS1|DMC1|UBB|FBXO5|HORMAD1|HROB|NANOS3|FOXO3|BCL2|H3-3A|NPM2|H3-3B|DDB1|USP9X|MCM8|DDX20|MCM9|MDK|LSM14B|REC114|MOS|MEIOSIN|GAS2…	174	GOBP_FEMALE_GAMETE_GENERATION	1.7692	0.0002	GOBP_FEMALE_GAMETE_GENERATION	FEMALE GAMETE GENERATION
Fat cell differentiation	2.61979	-2.61979	-0.3813	0.0257	BMP2|GATA2|HES1|SORT1|HDAC6|WNT1|SFRP1|CARM1|WNT3A|LRP3|SULT1E1|WWTR1|YAP1|MEX3C|ZFPM2|AKT1|ZNF385A|SMAD3|FTO|CDS1|ID2|WNT5B|LRP5|MIR103A1|ZC3H12A|FRZB|ZFP36|ZFP36L1|PTPRQ|ZFP36L2|PPARD|PPARG|E2F1|MIR29B1|MIR128-1|MAPK14|CREB1|ATAT1|MIR138-1|ENPP1|RREB1|JDP2|MIR21|TGFB1|PIM1|LPL|GNB3|TRIB3|MIR106A|SYAP1|GDF3|ID4|NOCT|TAF8|CCDC85B|MSX2|RORA|C1QL4|DKKL1|SIRT1|MIR107|XBP1|SNAI2|MIR181A2|MIR27A|MIR27…	148	GOBP_REGULATION_OF_FAT_CELL_DIFFERENTIATION	-1.6555	0.0024	GOBP_REGULATION_OF_FAT_CELL_DIFFERENTIATION	REGULATION OF FAT CELL DIFFERENTIATION
Fat cell differentiation	2.35655	-2.35655	-0.3111	0.0415	SORT1|CEBPD|WNT1|SFRP1|SH2B2|CARM1|WNT3A|SULT1E1|WWTR1|YAP1|MEX3C|ZFPM2|ARID5B|ATF2|ZNF385A|CCND1|SMAD3|FAM83A|FTO|CDS1|HMGA2|LRG1|ID2|IFRD1|IFRD2|WNT5B|FITM2|LRP5|ZC3H12A|ZFP36|ZFP36L1|ZFP36L2|PPARD|PPARG|E2F1|CLIP3|SOX8|TBL1XR1|MAPK14|CREB1|ANGPTL8|BBS4|C1QTNF3|RREB1|JDP2|TGFB1|LPL|GNB3|TRIB3|SYAP1|GDF3|OSBPL11|OSBPL8|TAF8|RORA|DKKL1|SIRT1|XBP1|SNAI2|MIR181A2|MIR27A|MIR27B|MIR17|BBS1|NAPEPLD|TR…	260	GOBP_FAT_CELL_DIFFERENTIATION	-1.4787	0.0044	GOBP_FAT_CELL_DIFFERENTIATION	FAT CELL DIFFERENTIATION
Gamete generation	4	4	0.3013	0.0004	CALR3|ZFY|DLD|ACSBG2|SLC26A8|WDR48|YY1|CSNK2A2|DHX36|DND1|IGF2R|PUM1|MYCBPAP|BCL2L1|FANCL|BOLL|DAZ1|ADAM18|DAZ2|E2F1|GGN|DAZ3|MMP2|DAZ4|GORASP2|DAZL|MTA2|NANOS1|HERC2|HERPUD2|NICOL1|RNF2|QKI|SPA17|HROB|RIMBP3|RIMBP3B|RIMBP3C|YBX3|MCM8|MCM9|HOXA10|SGPL1|NEURL4|SIRT1|SOX17|SOX9|FSHR|BCKDK|BRD2|ASZ1|STAU1|CCR6|RAD23B|B4GALNT1|BRDT|BRIP1|BRME1|BTBD18|C14ORF39|CTSH|GAL3ST1|CCNA1|CCNB2|WFDC2|ERCC1|CCNI…	872	GOBP_GAMETE_GENERATION	1.5713	0	GOBP_GAMETE_GENERATION	GAMETE GENERATION
Heterochromatin Formation and Epigenetic Control	4	4	0.4397	0.0001	CENPV|MBD3|NRDE2|H1-0|CBX1|H1-2|CBX5|H2AB1|IFI16|H2AB2|H2AB3|H2AC1|H2AC11|H2AC12|H2AC13|USP7|H2AC15|H2AC16|H2AC17|H2AC18|H2AC19|H2AC20|H2AC21|H2AC4|H2AC6|H2AC7|H2AC8|ZNF304|H2AJ|H2AL3|H2AP|H2AZ2|EZH2|PHF8|H2AC25|PIWIL1|MOV10|PIWIL2|HMGA2|BAP1|PIWIL4|UBR5|DNMT3L|TRIM28|CHEK1|SUV39H1|PTENP1-AS|HAT1|TASOR|H3-3A|BCL6|H3-3B|KDM5A|SIRT7|MORC2|LMNB1|WT1|LMNB2|LRIF1|SIRT1|MBD1|MBD3L1|MBD3L2|MBD3L2B|MBD3L…	209	GOBP_NEGATIVE_REGULATION_OF_GENE_EXPRESSION_EPIGENETIC	1.9784	0	GOBP_NEGATIVE_REGULATION_OF_GENE_EXPRESSION_EPIGENETIC	NEGATIVE REGULATION OF GENE EXPRESSION EPIGENETIC
Heterochromatin Formation and Epigenetic Control	4	4	0.3757	0.0002	ASH2L|CENPV|GLYR1|MBD3|NRDE2|H1-0|CBX1|H1-2|CBX5|H2AB1|IFI16|H2AB2|ALKBH4|H2AB3|H2AC1|H2AC11|ARID4A|H2AC12|ARID4B|H2AC13|USP7|H2AC15|ATAD2|H2AC16|ATAD2B|H2AC17|H2AC18|H2AC19|H2AC20|H2AC21|H2AC4|H2AC6|H2AC7|H2AC8|ZNF304|H2AJ|ZNF335|ATF2|H2AL3|H2AP|HDAC10|H2AZ2|EZH2|PHF8|H2AC25|PIWIL1|MOV10|PIWIL2|HMGA2|BAP1|H3C1|PIWIL4|UBR5|H3C10|DNMT3L|H3C11|H3C12|ZFP57|TRIM28|H3C2|H3C3|H3C4|H3C6|CHEK1|H3C7|H3C8|…	314	GOBP_EPIGENETIC_REGULATION_OF_GENE_EXPRESSION	1.7898	0	GOBP_EPIGENETIC_REGULATION_OF_GENE_EXPRESSION	EPIGENETIC REGULATION OF GENE EXPRESSION
Heterochromatin Formation and Epigenetic Control	2.60206	2.60206	0.5991	0.0269	SUZ12|MACROH2A2|PCGF3|PCGF5|LRIF1|XIST|SPEN|CDYL|RBM15|RBM15B|YTHDC1|MACROH2A1|LBR|BRCA1|HNRNPK|CIZ1|HDAC3|HNRNPU|RLIM|JARID2|KAT8|SMCHD1|METTL3	23	GOBP_SEX_CHROMOSOME_DOSAGE_COMPENSATION	1.8362	0.0025	GOBP_SEX_CHROMOSOME_DOSAGE_COMPENSATION	SEX CHROMOSOME DOSAGE COMPENSATION
Heterochromatin Formation and Epigenetic Control	4	4	0.5155	0	CENPV|HMGB1|MBD3|NRDE2|H1-0|CBX1|H1-2|CBX5|MACROH2A1|H2AB1|H2AB2|H2AB3|MAEL|H2AC1|H2AC11|H2AC12|H2AC13|H2AC15|H2AC16|H2AC17|H2AC18|H2AC19|H2AC20|H2AC21|H2AC4|H2AC6|H2AC7|H2AC8|ZNF304|H2AJ|H2AL3|H2AP|H2AZ2|EZH2|PHF8|DDX4|H2AC25|PIWIL1|PIWIL2|HMGA2|BAP1|PIWIL4|UBR5|DNMT3L|DOT1L|SMARCA5|TRIM28|EZH1|SUV39H1|PARTICL|METTL3|MACROH2A2|UBR2|PTENP1-AS|HAT1|BEND3|SMYD5|TASOR|H3-3A|BCL6|H3-3B|FKBP6|KDM5A|SM…	161	GOBP_HETEROCHROMATIN_FORMATION	2.23	0	GOBP_HETEROCHROMATIN_FORMATION	HETEROCHROMATIN FORMATION
Immune Cell Activation & Adhesion	4	-4	-0.4691	0.0003	HHLA2|HAVCR2|HMGB1|ICOSLG|SPN|HLA-A|IGF1|TFRC|HLA-DPB1|IGF2|IGFBP2|SYK|IL12B|TNFSF4|EFNB1|IL12RB1|HES1|IL18|IL2|NR5A2|IL23A|IL23R|IL2RA|LGALS9|TICAM1|MIR30B|ZP3|IL34|PDCD1LG2|ZP4|PPP3CA|WNT3A|MPL|RPS3|DHPS|SLAMF1|TLR4|STAT5A|ANXA1|STAT5B|TMIGD2|IRS2|TNFSF9|TLR9|DNAJA3|ZNF335|CSF1|JAK2|IL1B|CD320|KITLG|NMB|NMBR|TRAF6|CDKN1A|MIF|VCAM1|FLT3LG|KIT|SPTA1|BCL2L1|IL5|OCSTAMP|CLECL1P|ADA|MYD88|TCF3|TNFRS…	173	GOBP_POSITIVE_REGULATION_OF_LEUKOCYTE_PROLIFERATION	-2.0316	0	GOBP_POSITIVE_REGULATION_OF_LEUKOCYTE_PROLIFERATION	POSITIVE REGULATION OF LEUKOCYTE PROLIFERATION
Immune Cell Activation & Adhesion	3.52288	-3.52288	-0.3473	0.0054	HAVCR2|SPN|HLA-A|TFRC|HLA-DPB1|HLA-DQB1|TNFSF11|HLA-DRB1|TNFSF4|EFNB1|HLA-DRB3|VNN1|HSPD1|SELE|EFNB2|IFNG|HAS2|DHPS|DPP4|EGR3|ANXA1|ITGA4|ACTL6B|IL1B|ITGB2|KITLG|CD5|IRAK1|VCAM1|SPTA1|ETS1|SRC|ARID1A|ARID1B|BRD7|FUT4|KLRC4-KLRK1|CLECL1P|KLRK1|PTPN11|LCK|FOXO3|BCL6|TGFB1|LYN|MDK|MALT1|ST3GAL4|GLI2|MAP3K8|XBP1|CD27|DOCK8|CD70|CCL21|PBRM1|TNFRSF14|PHF10|CCR7|CD47|TYK2|SART1|SIRPB1|SIRPG|SMARCA2|B2M|…	287	GOBP_POSITIVE_REGULATION_OF_LEUKOCYTE_CELL_CELL_ADHESION	-1.654	0.0003	GOBP_POSITIVE_REGULATION_OF_LEUKOCYTE_CELL_CELL_ADHESION	POSITIVE REGULATION OF LEUKOCYTE CELL CELL ADHESION
Immune Cell Activation & Adhesion	2.23657	-2.23657	-0.3202	0.0494	HLA-DRB1|TNFSF4|VNN1|IFNG|SFRP1|EGR3|ANXA1|TCF7|ZEB1|TMEM131L|ACTL6B|SLC4A2|CD2|FANCA|INPP5D|AXL|ERBB2|ID2|IRF1|IRF4|RC3H1|ZC3H12A|ZFP36L1|ZFP36L2|ARID1A|ARID1B|BRD7|SPI1|CLPTM1|LCK|FOXO3|DTX1|BCL6|TGFB1|BRAF|DDRGK1|MDK|IL15RA|MALT1|GLI2|XBP1|CD27|PBRM1|PHF10|SART1|ASCL2|SMARCA2|SMARCC2|SMARCD1|BATF|NFAM1|SMARCD2|ZBTB1|SMARCE1|ZBTB7B|BRD2|BRD4|NFKBID|CAMK4|NFKBIZ|CCL19|CCR2|NLRP3|ZC3H8|CD69|CD74|…	228	GOBP_REGULATION_OF_LYMPHOCYTE_DIFFERENTIATION	-1.4757	0.0058	GOBP_REGULATION_OF_LYMPHOCYTE_DIFFERENTIATION	REGULATION OF LYMPHOCYTE DIFFERENTIATION
Immune Cell Activation & Adhesion	2.67778	-2.67778	-0.3496	0.024	HAVCR2|SPN|CYGB|HLA-DRB1|TNFSF4|TSPAN32|SDC4|SFRP1|ANXA1|EMILIN1|TMEM131L|SLC4A2|INPP5D|AXL|ERBB2|ID2|IRF1|RC3H1|ITCH|ZC3H12A|ADAMTS18|MIR130A|SRC|SYT11|CD33|CLEC12A|TNFAIP8L2|LAX1|PTPN11|LGALS3|APOE|DTX1|BCL6|FAM76B|TGFB1|LYN|MDK|GLMN|GPNMB|LDLR|LRFN5|LST1|GRN|MILR1|MIR27A|TNFRSF14|NOS3|ADORA2A|UFL1|MNDA|SH2B3|ARG2|ASCL2|TYROBP|XCL1|ZBTB7B|BTLA|SOCS6|TAFA3|BPI|ZBTB46|ZC3H8|CD200|CD69|CD74|NR1D1|…	229	GOBP_NEGATIVE_REGULATION_OF_CELL_ACTIVATION	-1.5783	0.0021	GOBP_NEGATIVE_REGULATION_OF_CELL_ACTIVATION	NEGATIVE REGULATION OF CELL ACTIVATION
Immune Cell Activation & Adhesion	4	-4	-0.522	0.0007	HHLA2|HAVCR2|HMGB1|ICOSLG|SPN|HLA-A|IGF1|TFRC|HLA-DPB1|IGF2|IGFBP2|SYK|IL12B|TNFSF4|EFNB1|IL12RB1|HES1|IL18|IL2|NR5A2|IL23A|IL23R|IL2RA|LGALS9|MIR30B|ZP3|PDCD1LG2|ZP4|PPP3CA|RPS3|DHPS|SLAMF1|STAT5A|ANXA1|STAT5B|TMIGD2|TNFSF9|DNAJA3|JAK2|IL1B|KITLG|TRAF6|VCAM1|SPTA1|CLECL1P|VTCN1|MIR21|ZAP70|AIF1|BTNL2|CD70|LEP|TYK2|NCK1|NCK2|IL21|NCKAP1L|CARD11|IL4|XCL1|CCL19|CD276|CCR2|CD28|SLC7A1|RASAL3|CCDC88B…	108	GOBP_POSITIVE_REGULATION_OF_T_CELL_PROLIFERATION	-2.0354	0	GOBP_POSITIVE_REGULATION_OF_T_CELL_PROLIFERATION	POSITIVE REGULATION OF T CELL PROLIFERATION
Immune Cell Activation & Adhesion	3.09691	-3.09691	-0.2859	0.0112	CDH17|SPN|STAT3|DLL4|TNFSF4|VNN1|SFRP1|EGR3|YY1|TCF7|ZEB1|SYVN1|TMEM131L|ATF2|ITGA4|CSF1|SLC4A2|JUN|EZH2|FLT3|ERBB2|ID2|RC3H1|THOC5|ZC3H12A|ZFP36L1|ZFP36L2|SRF|PPARG|MMP9|SPI1|MYD88|QKI|TNFRSF9|ARMC5|TGFB1|FZD7|FZD8|GATA1|MDK|NR3C1|PBX1|GLI2|RORA|SIRT1|XBP1|HDAC5|CD27|HDAC9|ADAM17|TRPM2|AICDA|AIRE|CHD7|TSC1|HHEX|ASCL2|B2M|AZI2|BATF|HOXA7|ITGB6|BCL3|BATF2|BRD2|BATF3|BRD4|C17ORF99|CAMK4|CCL19|CCR2|…	541	GOBP_MONONUCLEAR_CELL_DIFFERENTIATION	-1.4729	0.0008	GOBP_MONONUCLEAR_CELL_DIFFERENTIATION	MONONUCLEAR CELL DIFFERENTIATION
Immune Cell Activation & Adhesion	2.46852	-2.46852	-0.3029	0.034	IL20|TNFRSF11B|TNFRSF11A|TNFSF11|HLA-DRB1|TNFSF4|VNN1|IFNG|SFRP1|EGR3|ANXA1|TCF7|ZEB1|TMEM131L|ACTL6B|CSF1|SLC4A2|CD2|FANCA|INPP5D|KITLG|CCR1|AXL|ERBB2|ID2|IRF1|IRF4|RC3H1|KLF10|IRF7|ZC3H12A|ZFP36L1|ZFP36L2|ARID1A|POU4F2|ARID1B|BRD7|CLEC12A|SPI1|CLPTM1|CREB1|QKI|LCK|CUL4A|FOXO3|LGALS3|DTX1|BCL6|TGFB1|BRAF|DDRGK1|LTF|LYN|MDK|IL15RA|MALT1|GLI2|XBP1|CD27|PBRM1|PHF10|FSHR|CARTPT|SART1|ASCL2|TYROBP|SM…	345	GOBP_REGULATION_OF_LEUKOCYTE_DIFFERENTIATION	-1.4842	0.0034	GOBP_REGULATION_OF_LEUKOCYTE_DIFFERENTIATION	REGULATION OF LEUKOCYTE DIFFERENTIATION
Immune Cell Activation & Adhesion	2.39794	-2.39794	-0.2578	0.0382	CDH17|SPN|TNFRSF11B|STAT3|TFRC|DLL4|TNFRSF11A|TNFSF11|TNFSF4|VNN1|SFRP1|GPC3|EGR3|YY1|TCF7|ZEB1|SIGLEC15|SYVN1|TMEM131L|ATF2|ITGA4|CSF1|SLC4A2|JUN|EZH2|KITLG|FLT3|ERBB2|ID2|RC3H1|THOC5|ZC3H12A|ZFP36L1|ZFP36L2|SRC|POU4F2|SRF|PPARG|MMP9|SPI1|MAPK14|MYD88|QKI|TNFRSF9|ARMC5|TGFB1|FZD7|FZD8|GATA1|MDK|NR3C1|PBX1|GLI2|RORA|SIRT1|XBP1|HDAC5|CD27|HDAC9|ADAM17|FSHR|TRPM2|CARTPT|AICDA|AIRE|CHD7|TSC1|HHEX|AS…	648	GOBP_LEUKOCYTE_DIFFERENTIATION	-1.3625	0.004	GOBP_LEUKOCYTE_DIFFERENTIATION	LEUKOCYTE DIFFERENTIATION
Immune Cell Activation & Adhesion	3.09691	-3.09691	-0.397	0.0111	HAVCR2|HMGB1|SPN|IDO1|IFNL1|HLA-DRB1|PGLYRP1|TNFSF4|PGLYRP2|PGLYRP3|TSPAN32|IL2|SDC4|IL2RA|LAPTM5|LGALS9|LILRB4|LRRC32|MIR181C|MIR30B|SFRP1|PDCD1LG2|PRNP|SCRIB|STAT5A|ANXA1|TMEM131L|TNFAIP3|MARCHF7|TNFRSF21|SLC4A2|INPP5D|AXL|ERBB2|ID2|IRF1|RC3H1|HMGB3|ITCH|ZC3H12A|INHA|NRARP|TYRO3|CLEC12A|CDKN2A|RAG2|TNFAIP8L2|TBC1D10C|LAX1|PTPN11|VSIG4|VTCN1|LGALS3|BANK1|DTX1|BCL6|MIR21|TGFB1|BTK|LYN|MDK|GLMN|GP…	177	GOBP_NEGATIVE_REGULATION_OF_LYMPHOCYTE_ACTIVATION	-1.7214	0.0008	GOBP_NEGATIVE_REGULATION_OF_LYMPHOCYTE_ACTIVATION	NEGATIVE REGULATION OF LYMPHOCYTE ACTIVATION
Immune Cell Activation & Adhesion	4	-4	-0.3169	0.001	SPN|TFRC|TNFSF11|TNFSF4|EFNB1|VNN1|SDC4|EFNB2|SFRP1|SH3KBP1|DPP4|EGR3|TCF7|ZEB1|IRS2|TMEM131L|ZNF335|SLC4A2|KITLG|ERBB2|ID2|RC3H1|SPTA1|ZC3H12A|MIR130A|ZFP36L1|ZFP36L2|SRC|SPI1|TNFAIP8L2|MYD88|PTPN11|TAC1|TACR1|TNFRSF9|TIRAP|TGFB1|MDK|GLI2|GLMN|GPNMB|XBP1|BLOC1S3|CD27|CD70|TNFRSF14|AHR|ADORA2A|AKIRIN2|APLF|ARG2|ASCL2|TYROBP|ATAD5|B2M|BATF|BRD2|BRD4|BTLA|EFNB3|CAMK4|CCL19|CCR2|CCDC88B|CD1D|CD209|Z…	530	GOBP_REGULATION_OF_LYMPHOCYTE_ACTIVATION	-1.6241	0	GOBP_REGULATION_OF_LYMPHOCYTE_ACTIVATION	REGULATION OF LYMPHOCYTE ACTIVATION
Immune Cell Activation & Adhesion	2.79588	-2.79588	-0.581	0.0195	PRKCQ|XCL1|LGALS9B|PTPRC|CBLB|LGALS9C|HLA-A|MAPK8IP1|ZBTB7B|SYK|IL12B|MYC|TNFSF4|IL18|IL2|IL23A|CCR2|CD28|IL2RA|LGALS9|RASAL3|CD3E|ZAP70|SH3RF1|CD55|RIPK2|TWSG1|VSIR|HLA-E|CD81|JAK2|SLC4A2|CLEC4G|NDFIP1|IRF1|EBI3|ITCH|TGFBR2|TNFRSF14|ELF4|CD274|TYK2|ARG2|FOXP3|DOCK2|CARD11|IL15	47	GOBP_ALPHA_BETA_T_CELL_PROLIFERATION	-1.9171	0.0016	GOBP_ALPHA_BETA_T_CELL_PROLIFERATION	ALPHA BETA T CELL PROLIFERATION
Immune Cell Activation & Adhesion	3.22185	-3.22185	-0.423	0.0093	HAVCR2|HMGB1|SPN|IDO1|IFNL1|HLA-DRB1|TNFSF4|TSPAN32|IL2|SDC4|IL2RA|LAPTM5|MIRLET7G|LGALS9|LILRB4|LRRC32|MIR181C|MIR30B|PDCD1LG2|PRNP|MIRLET7E|SCRIB|STAT5A|ANXA1|AKT1|TMEM131L|MARCHF7|TNFRSF21|SLC4A2|ERBB2|IRF1|RC3H1|ITCH|ZC3H12A|MIR221|MIR222|NRARP|CDKN2A|RAG2|TNFAIP8L2|LAX1|MIR31|PTPN11|VSIG4|VTCN1|LGALS3|WNK1|DTX1|BCL6|MIR21|TGFB1|MDK|MIR141|GLMN|GPNMB|MIR27A|MIR146A|CBFB|CCL21|IL10|TNFRSF14|DA…	159	GOBP_NEGATIVE_REGULATION_OF_LEUKOCYTE_CELL_CELL_ADHESION	-1.7988	0.0006	GOBP_NEGATIVE_REGULATION_OF_LEUKOCYTE_CELL_CELL_ADHESION	NEGATIVE REGULATION OF LEUKOCYTE CELL CELL ADHESION
Immune Cell Activation & Adhesion	4	-4	-0.2928	0.0016	SPN|CYGB|DDR2|TFRC|TNFSF11|TNFSF4|EFNB1|VNN1|SDC4|EFNB2|VPS33B|SFRP1|SH3KBP1|DPP4|EGR3|TCF7|ZEB1|IRS2|EMILIN1|EMILIN2|TMEM131L|ZNF335|SLC4A2|KITLG|ERBB2|ID2|RC3H1|SPTA1|ZC3H12A|MIR130A|ZFP36L1|ZFP36L2|SRC|SPI1|TNFAIP8L2|MYD88|PTPN11|TAC1|TACR1|TNFRSF9|TIRAP|APOE|FUNDC2|TGFB1|HAVCR1|MDK|GLI2|GLMN|RORA|GPNMB|XBP1|GRN|BLOC1S3|THBS1|CD27|CD70|TNFRSF14|WNT5A|AHR|ADORA2A|AKIRIN2|APLF|ARG2|ASCL2|TYROBP|…	663	GOBP_REGULATION_OF_CELL_ACTIVATION	-1.5274	0.0001	GOBP_REGULATION_OF_CELL_ACTIVATION	REGULATION OF CELL ACTIVATION
Immune Cell Activation & Adhesion	4	-4	-0.437	0.0001	HAVCR2|SPN|HLA-A|TFRC|HLA-DPB1|HLA-DRB1|TNFSF4|EFNB1|TSPAN32|SDC4|DHPS|ANXA1|TMEM131L|SLC4A2|IL1B|KITLG|ERBB2|IRF1|RC3H1|VCAM1|SPTA1|ITCH|ALKBH5|CCND3|CD151|CLECL1P|PTPN11|TNFRSF9|LGALS3|BCL6|LIPA|ARMC5|TGFB1|MALT1|GLMN|LMO1|GPNMB|DOCK8|CD70|TNFRSF14|PSMB10|TYK2|ARG2|XCL1|ZBTB7B|BTLA|CCL19|CCR2|SLC7A1|CCDC88B|CD1D|WNT4|CD209|CD4|CORO1A|CD40LG|CD80|CD37|CD86|NCSTN|CLEC4G|PELI1|FKBP1B|EBI3|P2RX7|DO…	225	GOBP_T_CELL_PROLIFERATION	-1.9927	0	GOBP_T_CELL_PROLIFERATION	T CELL PROLIFERATION
Immune Cell Activation & Adhesion	4	-4	-0.4206	0.0001	HAVCR2|SPN|HLA-A|TFRC|HLA-DPB1|HLA-DRB1|TNFSF4|EFNB1|TSPAN32|SDC4|WNT3A|DHPS|ANXA1|IRS2|TMEM131L|ZNF335|CSF1|SLC4A2|IL1B|INPP5D|KITLG|ERBB2|IRF1|CDKN1A|RC3H1|VCAM1|SPTA1|ITCH|BCL2L1|CLECL1P|MYD88|CSF2|PTPN11|TAC1|TACR1|TNFRSF9|LGALS3|TIRAP|BCL2|BCL6|TGFB1|BST1|LYN|BST2|MAPK1|GLMN|LMO1|GPNMB|LST1|GREM1|MEF2C|PHF7|CD70|TNFRSF14|AHR|TYK2|HHEX|MNDA|ARG2|TYROBP|ATAD5|XCL1|NFATC2|ZBTB7B|BTLA|CCL19|CCR2…	284	GOBP_REGULATION_OF_LEUKOCYTE_PROLIFERATION	-1.9452	0	GOBP_REGULATION_OF_LEUKOCYTE_PROLIFERATION	REGULATION OF LEUKOCYTE PROLIFERATION
Immune Cell Activation & Adhesion	2.63827	-2.63827	-0.3455	0.0256	HAVCR2|SPN|HLA-DRB1|TNFSF4|TSPAN32|SDC4|WNT1|ANXA1|APOA1|TMEM131L|SLC4A2|ERBB2|IRF1|SPECC1L|RC3H1|ITCH|ZC3H12A|ADAMTS18|MIR221|MIR222|SPI1|TNFAIP8L2|SWAP70|LAX1|PTPN11|LGALS3|DTX1|BCL6|TGFB1|MAP2K1|MDK|MIR141|GLMN|GPNMB|MIR27A|MIR146A|CCL21|TNFRSF14|ADORA2A|PLG|TRPV4|UFL1|SH2B3|ARG2|ASCL2|XCL1|ZBTB7B|BTLA|SOCS6|ADIPOQ|ZC3H8|YTHDF2|AKNA|CD69|CD74|CD80|CD37|CD86|CLEC4G|PELI1|UBASH3B|CXCL12|KLF4|PPA…	215	GOBP_NEGATIVE_REGULATION_OF_CELL_CELL_ADHESION	-1.5702	0.0023	GOBP_NEGATIVE_REGULATION_OF_CELL_CELL_ADHESION	NEGATIVE REGULATION OF CELL CELL ADHESION
Immune Cell Activation & Adhesion	4	-4	-0.3385	0.0012	SPN|TFRC|TNFSF11|TNFSF4|EFNB1|VNN1|SDC4|EFNB2|DPP4|EGR3|TCF7|ZEB1|TMEM131L|SLC4A2|KITLG|ERBB2|RC3H1|SPTA1|ZC3H12A|SRC|TNFAIP8L2|PTPN11|TNFRSF9|TGFB1|MDK|GLI2|GLMN|GPNMB|XBP1|CD27|CD70|TNFRSF14|ADORA2A|ARG2|ASCL2|B2M|BATF|BRD2|BRD4|BTLA|EFNB3|CAMK4|CCL19|CCR2|CCDC88B|CD1D|CD209|ZC3H8|CD4|CD40LG|CD69|CD74|CD80|CD37|CD86|KAT2A|CLEC4G|DUSP10|EBI3|FBXO38|FGL1|PLA2G5|HFE|HLA-DMA|HLA-DMB|FGL2|HLA-DOA|HL…	401	GOBP_REGULATION_OF_T_CELL_ACTIVATION	-1.6925	0	GOBP_REGULATION_OF_T_CELL_ACTIVATION	REGULATION OF T CELL ACTIVATION
Immune Cell Activation & Adhesion	4	-4	-0.3154	0.0003	SPN|STAT3|TFRC|DLL4|TNFSF11|TNFSF4|EFNB1|CDH26|VNN1|SDC4|EFNB2|DPP4|EGR3|TCF7|ZEB1|TMEM131L|ATF2|SLC4A2|SMAD3|KITLG|ERBB2|RC3H1|SPTA1|ZC3H12A|ZFP36L1|ZFP36L2|SRC|SRF|SPI1|TNFAIP8L2|PTPN11|TNFRSF9|ARMC5|TGFB1|FZD7|FZD8|MDK|GLI2|GLMN|RORA|SEMA6D|GPNMB|XBP1|CD27|CD70|TNFRSF14|ADAM17|ADORA2A|AIRE|CHD7|TSC1|ARG2|ASCL2|TYROBP|B2M|AZI2|BATF|BCL3|BRD2|BRD4|BTLA|EFNB3|CAMK4|CCL19|CCR2|CCR6|CD1C|CCDC88B|CD…	604	GOBP_T_CELL_ACTIVATION	-1.6319	0	GOBP_T_CELL_ACTIVATION	T CELL ACTIVATION
Immune Cell Activation & Adhesion	4	-4	-0.4129	0	HAVCR2|SPN|HLA-A|TFRC|HLA-DPB1|TNFSF11|HLA-DRB1|TNFSF4|EFNB1|TSPAN32|SDC4|HSPD1|WNT3A|IGHE|DHPS|ANXA1|IRS2|TMEM131L|ZNF335|CSF1|SLC4A2|IL1B|INPP5D|KITLG|FLT3|ERBB2|BAP1|IRF1|CDKN1A|RC3H1|VCAM1|SPTA1|ITCH|BCL2L1|ALKBH5|CCND3|CD151|PURA|CLECL1P|MYD88|CSF2|PTPN11|TAC1|TACR1|TNFRSF9|LGALS3|TIRAP|BCL2|BCL6|LIPA|ARMC5|TGFB1|BST1|LYN|BST2|MALT1|MAPK1|GLMN|LMO1|GPNMB|LST1|GREM1|MEF2C|PHF7|DOCK8|CD70|TNFR…	356	GOBP_LEUKOCYTE_PROLIFERATION	-1.9966	0	GOBP_LEUKOCYTE_PROLIFERATION	LEUKOCYTE PROLIFERATION
Immune Cell Activation & Adhesion	2.34679	-2.34679	-0.2925	0.042	SPN|DDR2|TFRC|TNFSF11|TNFSF4|EFNB1|VNN1|EFNB2|SH3KBP1|DPP4|EGR3|IRS2|ZNF335|KITLG|SPTA1|MIR130A|SRC|SPI1|MYD88|PTPN11|TAC1|TACR1|TIRAP|TGFB1|HAVCR1|MDK|GLI2|XBP1|BLOC1S3|THBS1|CD27|CD70|TNFRSF14|WNT5A|AKIRIN2|TYROBP|ATAD5|B2M|BRD2|BRD4|EFNB3|CCL19|CCR2|CCDC88B|CD1D|CD209|CD4|CD40|CD200|CD40LG|CD74|CD80|CD86|CLCF1|CLEC4D|CHRNB2|CTSC|DUSP10|EBI3|EPHB2|EXOSC3|EXOSC6|FBXO38|GPR183|TNF|HLA-DMA|HLA-DMB…	400	GOBP_POSITIVE_REGULATION_OF_CELL_ACTIVATION	-1.4621	0.0045	GOBP_POSITIVE_REGULATION_OF_CELL_ACTIVATION	POSITIVE REGULATION OF CELL ACTIVATION
Immune Cell Activation & Adhesion	4	-4	-0.3486	0.0012	HAVCR2|SPN|HLA-A|TFRC|HLA-DPB1|HLA-DQB1|TNFSF11|HLA-DRB1|TNFSF4|EFNB1|HLA-DRB3|VNN1|HSPD1|SELE|SERPINF2|EFNB2|IFNG|WNT3A|PTPN23|HAS2|DHPS|DPP4|EGR3|ANXA1|EMILIN1|EMILIN2|ITGA4|ACTL6B|IL1B|ITGB2|KITLG|CD5|IRAK1|PTPRU|VCAM1|SPTA1|ETS1|CEACAM6|SRC|ARID1A|ARID1B|BRD7|FUT4|KLRC4-KLRK1|CLECL1P|KLRK1|FOXA1|PTPN11|LCK|FOXO3|BCL6|TGFB1|GP6|TJP1|LYN|MDK|MALT1|ST3GAL4|GLI2|MAP3K8|XBP1|CD27|DOCK8|CD70|CCL21|…	341	GOBP_POSITIVE_REGULATION_OF_CELL_CELL_ADHESION	-1.7105	0	GOBP_POSITIVE_REGULATION_OF_CELL_CELL_ADHESION	POSITIVE REGULATION OF CELL CELL ADHESION
Immune Cell Activation & Adhesion	4	-4	-0.3199	0.0008	SPN|TFRC|TNFSF11|TNFSF4|EFNB1|VNN1|SDC4|SELE|SERPINF2|EFNB2|VPS33B|PTPN23|HAS2|DPP4|EGR3|EMILIN1|EMILIN2|TMEM131L|ITGA4|SLC4A2|EPHB3|KITLG|ERBB2|PTPRU|SPECC1L|RC3H1|SPTA1|ETS1|ZC3H12A|CEACAM6|SRC|MIR221|MIR222|FUT4|FUT9|SPI1|TNFAIP8L2|MAPK14|SWAP70|FOXA1|PTPN11|PTPRG|PTPRR|CELSR2|TGFB1|MAP2K1|TJP1|MDK|MIR141|ST3GAL4|GLI2|GLMN|GPNMB|ZDHHC21|XBP1|CD27|CD70|TNFRSF14|WNT5A|ADORA2A|PLG|TRPV4|PKP1|ARG2…	523	GOBP_REGULATION_OF_CELL_CELL_ADHESION	-1.6393	0	GOBP_REGULATION_OF_CELL_CELL_ADHESION	REGULATION OF CELL CELL ADHESION
Immune Cell Activation & Adhesion	3.04576	-3.04576	-0.2949	0.0122	TNFRSF11B|STAT3|TNFRSF11A|TNFSF11|TNFSF4|VNN1|SCIN|YPEL4|SFRP1|EGR3|HIF1A|TCF7|ZEB1|SIGLEC15|TMEM131L|CSF1|SLC4A2|KITLG|TCIM|ERBB2|ID2|RC3H1|ETS1|ZC3H12A|ZFP36|ZFP36L1|ZFP36L2|POU4F2|MIR221|MIR222|SPI1|MAPK14|QKI|KAT6A|TGFB1|GABPA|GATA1|MDK|GLI2|TSC22D1|XBP1|SNAI2|CD27|FSHR|CARTPT|MYSM1|ASCL2|TYROBP|CSF3R|B2M|HOXA5|BATF|HOXA7|BRD2|BRD4|CAMK4|CCL19|CCR2|ZC3H8|CD4|CD69|HOXB8|ZNF16|CD74|CD80|CD86|KA…	446	GOBP_REGULATION_OF_HEMOPOIESIS	-1.4925	0.0009	GOBP_REGULATION_OF_HEMOPOIESIS	REGULATION OF HEMOPOIESIS
Immune Cell Activation & Adhesion	4	-4	-0.3631	0.0001	SPN|TFRC|TNFSF11|TNFSF4|EFNB1|VNN1|SDC4|SELE|EFNB2|HAS2|DPP4|EGR3|TMEM131L|ITGA4|SLC4A2|ITGB7|KITLG|ERBB2|LRG1|RC3H1|SPTA1|ETS1|ZC3H12A|SRC|MIR221|MIR222|FUT4|FUT9|TNFAIP8L2|PTPN11|APOA4|TGFB1|MDK|SEMA4D|MIR141|ST3GAL4|GLI2|GLMN|SELPLG|GPNMB|ZDHHC21|XBP1|CD27|CD70|TNFRSF14|ADORA2A|ARG2|ASCL2|B2M|BRD2|BRD4|BTLA|EFNB3|CCL19|CCR2|CCDC88B|CD1D|CD209|ZC3H8|CD4|CD177|CD40LG|CD69|CD74|ITGA5|CD80|CD37|CD…	436	GOBP_LEUKOCYTE_CELL_CELL_ADHESION	-1.8242	0	GOBP_LEUKOCYTE_CELL_CELL_ADHESION	LEUKOCYTE CELL CELL ADHESION
Immune Cell Activation & Adhesion	2.52288	-2.52288	-0.4171	0.0309	HMGB1|HLA-A|SYK|HLA-DRB1|IL12B|TNFSF4|HLA-DRB3|IL12RB1|GPR65|IL18|IL2|IL23A|IL23R|IL2RA|LGALS9|LILRB4|IFNG|STAT5A|ANXA1|JAK2|SLC4A2|IRF1|IRF4|RC3H1|ITCH|ZC3H12A|ADA|AP3B1|LGALS3|BCL6|MIR21|ZAP70|MALT1|ZNF683|AP3D1|CBFB|CD83|IL12A|TNFRSF14|DAPL1|GLI3|ADORA2A|HSPH1|TYK2|IHH|ARG2|IL27|IL2RG|NCKAP1L|ASCL2|KCNK18|CARD11|KLHL25|XCL1|LGALS9B|BATF|CBLB|IL4R|LGALS9C|MAPK8IP1|ZBTB7B|BRD2|BRD4|CD160|NFKBID|…	124	GOBP_REGULATION_OF_ALPHA_BETA_T_CELL_ACTIVATION	-1.7168	0.003	GOBP_REGULATION_OF_ALPHA_BETA_T_CELL_ACTIVATION	REGULATION OF ALPHA BETA T CELL ACTIVATION
Immune Cell Activation & Adhesion	2.31876	-2.31876	-0.5176	0.0439	HMGB1|IL4|AZI2|BATF|ITGB6|BATF2|BATF3|CAMK4|TMEM176A|CCL19|LTBR|LGALS9|ZBTB46|LGALS1|LILRB1|LILRB2|PRTN3|FLT3|AXL|ITGB8|TRAF6|IRF4|TREM2|FLT3LG|TGFBR2|NOTCH2|CLEC12A|SPI1|CEBPB|MIR223|TAOK3|HLA-B|CSF2|LGALS3|RELB|TGFB1|HLA-G|GATA1|LYN|F2RL1|FCGR2B|DHRS2|RBPJ|PSEN1|IRF8|AGER|GAS6|TRPM2|CCR7|TMEM176B|DCSTAMP|UBD	52	GOBP_DENDRITIC_CELL_DIFFERENTIATION	-1.7574	0.0048	GOBP_DENDRITIC_CELL_DIFFERENTIATION	DENDRITIC CELL DIFFERENTIATION
Immune Cell Activation & Adhesion	4	-4	-0.3093	0.0012	CD63|CDH13|SPN|TFRC|DOCK1|DOCK5|TNFSF11|S100A10|TNFSF4|ZFHX3|EFNB1|VNN1|SDC4|SELE|FERMT1|SERPINF2|EFNB2|EPHA4|SFRP1|PTPN23|HAS2|DPP4|EGR3|ILK|EMILIN1|ITGA2|EMILIN2|ITGA3|ITGA4|CSF1|SMAD3|KITLG|ERBB2|PTPRU|MAP4K4|SPTA1|ETS1|HACD1|CEACAM6|HSD17B12|SRC|FUT4|TNFRSF18|FOXA1|PTPN11|FOXF1|FUT1|RET|RREB1|TESK1|P4HB|TGFB1|FBLN1|TGFB2|TJP1|MDK|ST3GAL4|GLI2|XBP1|CD27|CD70|TNFRSF14|TRIOBP|WNT5A|TSC1|PKP1|DMP…	506	GOBP_POSITIVE_REGULATION_OF_CELL_ADHESION	-1.5879	0.0001	GOBP_POSITIVE_REGULATION_OF_CELL_ADHESION	POSITIVE REGULATION OF CELL ADHESION
Immune Cell Activation & Adhesion	3.1549	-3.1549	-0.3722	0.0103	SPN|STAT3|HLA-A|HLA-DRB1|TNFSF4|HLA-DRB3|CDH26|IFNG|ANXA1|ATF2|SLC4A2|IRF1|IRF4|RC3H1|ITCH|ZC3H12A|ITK|LGALS3|BCL2|BCL6|ARMC5|BRAF|MALT1|RORA|TNFRSF14|ADORA2A|TYK2|ARG2|ASCL2|NCR3|XCL1|BATF|BCL3|ZBTB7B|BRD2|BRD4|NFKBID|NFKBIZ|CCL19|CCR2|NLRP3|CD69|CD80|CD86|CLEC4A|CLEC4G|CTSL|EBI3|ENTPD7|EOMES|DOCK2|IL15|PTPRC|GPR183|HFE|HLA-DRA|RC3H2|HLX|RIPK2|ATP7A|PNP|RSAD2|SHB|AGER|CD274|CRTAM|FOXP3|HMGB1|ICO…	204	GOBP_ALPHA_BETA_T_CELL_ACTIVATION	-1.6736	0.0007	GOBP_ALPHA_BETA_T_CELL_ACTIVATION	ALPHA BETA T CELL ACTIVATION
Insulin & Peptide Hormone Response	2.25964	2.25964	0.3198	0.0474	TRIM72|COL6A1|GOT1|SH2B2|VAMP2|SLC39A14|SHC1|SLC27A1|IRS2|RBX1|IL1B|ERRFI1|ATP2B1|SORBS1|SRSF5|NAMPT|NCOA1|NCOA2|ZFP36L1|MIR15B|POU4F2|PPARG|NDEL1|MSTN|G6PC1|EPRS1|MIR1271|PTPN11|MTCL2|FOXO4|BCAR1|GRB7|GAB1|INSR|TRIB3|SYAP1|MAPK1|OSBPL8|CAPN10|SIRT1|AP3S1|XBP1|HDAC5|HDAC9|CUL7|PTPRE|PCSK9|YWHAG|ZBTB7B|CFLAR|ADIPOQ|ADIPOR1|PDK2|PDK4|APC|ERFE|SERPINA12|HMGCS2|NR1H4|OGT|CSRP3|PARP1|SLC22A12|CUL3|FOX…	219	GOBP_CELLULAR_RESPONSE_TO_INSULIN_STIMULUS	1.4852	0.0055	GOBP_CELLULAR_RESPONSE_TO_INSULIN_STIMULUS	CELLULAR RESPONSE TO INSULIN STIMULUS
Insulin & Peptide Hormone Response	2.29243	2.29243	0.2912	0.0455	TRIM72|GNRHR|ACTN2|STAT3|DDR2|ROCK2|COL6A1|SOCS2|FAM114A1|GOT1|WNT1|SH2B2|VAMP2|SLC39A14|SHC1|SLC27A1|IRS2|RBX1|AGT|CCNA2|AGTR1|IL1B|ERRFI1|ATP2B1|SORBS1|SRSF5|TOP1|NAMPT|NCOA1|NCOA2|ZFP36L1|MIR15B|SRC|POU4F2|CYP11A1|PPARG|NDEL1|MSTN|G6PC1|UMODL1|CREB1|EPRS1|MIR1271|PTPN11|MTCL2|FOXO4|BCAR1|FUT1|GH1|GPR173|TGFB1|GRB7|HNF4A|GAB1|INSR|LYN|TRIB3|GDF15|SYAP1|MAP3K7|MAPK1|OSBPL8|CAPN10|SIRT1|AP3S1|XBP…	335	GOBP_CELLULAR_RESPONSE_TO_PEPTIDE_HORMONE_STIMULUS	1.4095	0.0051	GOBP_CELLULAR_RESPONSE_TO_PEPTIDE_HORMONE_STIMULUS	CELLULAR RESPONSE TO PEPTIDE HORMONE STIMULUS
Intracellular Transport Regulation	4	4	0.3372	0.0023	ACTN2|NRDE2|RUFY3|HSP90AA1|NUP214|OAZ1|OAZ2|FERMT1|IFNG|DNAJC13|USP7|PTPN23|VAMP2|VPS35|EHD1|HYAL2|PCNT|MLC1|IL1B|SMAD3|ERLEC1|IPO5|ARFIP1|UBAC2|UBR5|TARDBP|TRIM28|ARHGAP44|ZC3H12A|ALKBH5|ARHGAP1|CHMP3|SRC|ARHGAP8|KHDRBS1|PRP4K|NDEL1|GRIPAP1|MAPK14|XPO4|RAB11FIP3|PGAP1|ANXA2P2|PRR5L|PTPN11|YWHAB|RBM10|RAB11A|TENM1|IWS1|FAM76B|TGFB1|PPP1CC|BRSK2|MAP2K1|LRRK2|SIRT7|LAMP1|ZFAND1|MAPK1|THOC2|CAPN10|N…	274	GOBP_REGULATION_OF_INTRACELLULAR_TRANSPORT	1.6288	0.0001	GOBP_REGULATION_OF_INTRACELLULAR_TRANSPORT	REGULATION OF INTRACELLULAR TRANSPORT
Intracellular Transport Regulation	2.88606	2.88606	0.3771	0.0165	NRDE2|HSP90AA1|NUP214|HCLS1|FERMT1|XPO1|IFNG|RBM22|HYAL2|JAK2|IL1B|SMAD3|IPO5|UBR5|CPSF6|TARDBP|TRIM28|ZC3H12A|ALKBH5|KHDRBS1|RANGAP1|PRP4K|CDKN2A|EMD|MAPK14|XPO4|MDM2|PTPN11|YWHAB|NUP153|RBM10|WNK1|IWS1|MX2|FAM76B|TGFB1|PPP1CC|SIRT7|FLNA|THOC2|NSUN2|RIOK2|DMAP1|SMO|MAVS|XBP1|PPP1R12A|UFM1|ANGPT1|GAS6|BAG3|LEP|PTPN14|GLI3|TXN|HHEX|NEAT1|CTDSPL2|CDK5|EI24|AKAP8L|NFKBIA|GSK3B|PRKACA|JUP|IER3|CABP1|…	120	GOBP_REGULATION_OF_NUCLEOCYTOPLASMIC_TRANSPORT	1.6406	0.0013	GOBP_REGULATION_OF_NUCLEOCYTOPLASMIC_TRANSPORT	REGULATION OF NUCLEOCYTOPLASMIC TRANSPORT
Intracellular Transport Regulation	3.69897	3.69897	0.3948	0.0031	STK11|ACTN2|NRDE2|RUFY3|HSP90AA1|OAZ1|HCLS1|OAZ2|IFNG|PTPN23|VAMP2|NUMA1|EHD1|MTMR2|RBM22|HYAL2|TMEM30A|PCNT|TMEM30B|JAK2|MLC1|IL1B|SMAD3|IPO5|UBR5|CPSF6|TARDBP|TRIM28|ZC3H12A|TBC1D20|KHDRBS1|ZDHHC2|PRP4K|EDEM1|EDEM2|EMD|MAPK14|XPO4|PGAP1|ANXA2P2|MDM2|PRR5L|TENM1|TGFB1|PLA2G4E|ZFAND1|FLNA|CAPN10|LDLRAP1|RIOK2|DMAP1|SMO|MAVS|XBP1|BORCS5|FEZ1|ATP2A1|GAS6|BAG3|LEP|GLI3|MAP2|ASPH|CTDSPL2|NF2|SLC35D3|…	137	GOBP_POSITIVE_REGULATION_OF_INTRACELLULAR_TRANSPORT	1.7468	0.0002	GOBP_POSITIVE_REGULATION_OF_INTRACELLULAR_TRANSPORT	POSITIVE REGULATION OF INTRACELLULAR TRANSPORT
Intracellular Transport Regulation	3.39794	3.39794	0.4874	0.0068	CTDSPL2|NRDE2|HSP90AA1|HCLS1|GSK3B|PRKACA|IFNG|JUP|RBM22|HYAL2|ZPR1|JAK2|IL1B|SMAD3|EFCAB7|IPO5|SFN|UBR5|NEDD4|SHH|CPSF6|TARDBP|TRIM28|ZC3H12A|DHX9|HDAC3|KHDRBS1|PIK3R1|PIK3R2|PRP4K|CAMK1|NCBP2|ECT2|EMD|MAPK14|XPO4|ZIC1|MDM2|ANP32B|PPM1A|CHP2|PRKCD|TGFB1|EP300|PRKD1|TPR|FLNA|RAN|RIOK2|DMAP1|PSEN1|SMO|MAVS|RAPGEF3|CDK1|SIRT6|XBP1|YWHAE|GAS6|BAG3|LEP|GLI3|CDH1	63	GOBP_POSITIVE_REGULATION_OF_NUCLEOCYTOPLASMIC_TRANSPORT	1.9241	0.0004	GOBP_POSITIVE_REGULATION_OF_NUCLEOCYTOPLASMIC_TRANSPORT	POSITIVE REGULATION OF NUCLEOCYTOPLASMIC TRANSPORT
Intracellular Transport Regulation	2.48149	2.48149	0.3489	0.0337	RUFY3|HSP90AA1|OAZ1|HCLS1|OAZ2|FERMT1|XPO1|IFNG|VAMP2|RBM22|HYAL2|TMEM30A|PCNT|TMEM30B|JAK2|IL1B|SMAD3|ERLEC1|IPO5|UBAC2|UBR5|TARDBP|TRIM28|UBE2J1|ARHGAP44|ZC3H12A|RANGAP1|ZDHHC2|PRP4K|NDEL1|GRIPAP1|EDEM1|EDEM2|CDKN2A|EMD|MAPK14|XPO4|MDM2|PRR5L|PTPN11|YWHAB|TENM1|FAM76B|TGFB1|BRSK2|SIRT7|ZFAND1|FLNA|DMAP1|SMO|LCP1|MAVS|XBP1|UFM1|ANGPT1|OS9|GAS6|BAG3|LEP|PTPN14|GLI3|TXN|ASPH|CTDSPL2|GCC2|SLC35D3|C…	151	GOBP_REGULATION_OF_INTRACELLULAR_PROTEIN_TRANSPORT	1.5593	0.0033	GOBP_REGULATION_OF_INTRACELLULAR_PROTEIN_TRANSPORT	REGULATION OF INTRACELLULAR PROTEIN TRANSPORT
Intracellular Transport Regulation	2.85387	2.85387	0.4097	0.0172	ASPH|CTDSPL2|SLC35D3|RUFY3|CRYZL2P-SEC16B|PLK3|HSP90AA1|OAZ1|OAZ3|HCLS1|OAZ2|RIPOR1|GSK3B|PRKACA|IFNG|JUP|VAMP2|RBM22|TM9SF4|CD81|HYAL2|PDCD10|TMEM30A|PCNT|TMEM30B|ZPR1|JAK2|IL1B|SMAD3|EFCAB7|IPO5|SFN|KIF20B|UBR5|SHH|TARDBP|TRIM28|ZC3H12A|CHRM1|ICE1|SEC16B|HDAC3|PIK3R1|ZDHHC2|PIK3R2|PRP4K|CAMK1|EDEM1|EDEM2|AKAP5|SLC51B|ECT2|EMD|MAPK14|XPO4|ZIC1|MDM2|PRR5L|ANP32B|PPM1A|RAB29|CHP2|TENM1|PRKCD|TGFB1…	93	GOBP_POSITIVE_REGULATION_OF_INTRACELLULAR_PROTEIN_TRANSPORT	1.7078	0.0014	GOBP_POSITIVE_REGULATION_OF_INTRACELLULAR_PROTEIN_TRANSPORT	POSITIVE REGULATION OF INTRACELLULAR PROTEIN TRANSPORT
Kinetochore & Centromere Assembly	3.30103	3.30103	0.6422	0.008	MIS12|NDC80|CENPA|NUF2|CENPF|CENPH|CENPK|SUGT1|DLGAP5|RNF4|CENPT|KNTC1|POGZ|CENPW|CENPX|SMC2|SMC4|CENPC|TRAPPC12|CENPE|SENP6	21	GOBP_KINETOCHORE_ORGANIZATION	2.0019	0.0005	GOBP_KINETOCHORE_ORGANIZATION	KINETOCHORE ORGANIZATION
Kinetochore & Centromere Assembly	3.09691	3.09691	0.6657	0.0109	MIS12|CENPA|CENPF|CENPH|CENPK|SUGT1|DLGAP5|RNF4|CENPT|KNTC1|POGZ|CENPW|CENPX|CENPC|TRAPPC12|CENPE|SENP6	17	GOBP_KINETOCHORE_ASSEMBLY	1.9496	0.0008	GOBP_KINETOCHORE_ASSEMBLY	KINETOCHORE ASSEMBLY
Kinetochore & Centromere Assembly	3.30103	3.30103	0.5918	0.0079	MIS12|CENPV|KNTC1|NASP|H3-3A|OIP5|H3-3B|MIS18A|TRAPPC12|CENPA|RB1|CENPF|CENPH|CENPI|CENPK|SUGT1|CENPN|CENPO|DLGAP5|CENPP|RNF4|CENPT|POGZ|CENPW|ITGB3BP|CENPX|CENPC|CENPE|HJURP|SENP6	30	GOBP_CENTROMERE_COMPLEX_ASSEMBLY	2.0127	0.0005	GOBP_CENTROMERE_COMPLEX_ASSEMBLY	CENTROMERE COMPLEX ASSEMBLY
Leukocyte apoptosis	2.56864	-2.56864	-0.3823	0.0282	IDO1|GHSR|LGALS16|IL2|LMBR1L|MIRLET7B|IL2RA|HCLS1|LGALS9|RIPK3|HIF1A|STAT5A|ANXA1|CASP7|IRS2|AKT1|DNAJA3|FAS|SIVA1|TNFRSF21|TSC22D3|CCR5|KITLG|AXL|RAPGEF2|IRF3|MIF|IRF7|BCL2L1|CHEK2|FASLG|CDKN2A|ADA|AURKB|LGALS3|RIPK1|BAX|BCL10|BCL2|PIK3CB|BCL6|LIPA|TGFB2|BTK|LYN|NOC2L|SIRT1|MEF2C|MERTK|CD27|DOCK8|BCL11B|CCL21|IL10|GAS6|ADAM17|CCR7|MIR34A|WNT5A|GLI3|DFFA|TP53|ARG2|EBF4|BBC3|PIP|BCL3|IL7R|MIR17HG|…	126	GOBP_LEUKOCYTE_APOPTOTIC_PROCESS	-1.6581	0.0027	GOBP_LEUKOCYTE_APOPTOTIC_PROCESS	LEUKOCYTE APOPTOTIC PROCESS
Leukocyte apoptosis	2.74473	-2.74473	-0.6615	0.0208	CDKN2A|IL6|CCR5|GHSR|SIRT1|ZMPSTE24|PLEKHO2|CTSL|HCAR2|MEF2C|PIK3CD|FCAR|MIRLET7B|IRF3|ITPKB|IRF7|PIK3CB|CCL5|NOD2|FASLG|ANXA1|SELENOS|SLC7A11	23	GOBP_INFLAMMATORY_CELL_APOPTOTIC_PROCESS	-1.9068	0.0018	GOBP_INFLAMMATORY_CELL_APOPTOTIC_PROCESS	INFLAMMATORY CELL APOPTOTIC PROCESS
Leukocyte apoptosis	2.24413	-2.24413	-0.4579	0.0482	BBC3|PIP|IDO1|BCL3|IL7R|LGALS16|JAK3|KIFAP3|PERP|LMBR1L|IL2RA|PTCRA|LGALS9|CCL5|ZC3H8|RIPK3|HIF1A|AKT1|DNAJA3|FAS|SIVA1|TSC22D3|PRELID1|BCL2L11|ADAM8|CHEK2|PDCD1|FASLG|P2RX7|PRKD2|GIMAP8|PRKCQ|ADA|RAG1|ST3GAL1|LGALS3|RIPK1|BAX|BCL10|BCL2|LIPA|RORC|TGFB2|BAK1|CD27|DOCK8|BCL11B|WNT5A|GLI3|KDELR1|CD274|DFFA|SLC46A2|TP53|CLC|BMP4|FADD|ARG2|EBF4|EFNA1|GPAM	61	GOBP_T_CELL_APOPTOTIC_PROCESS	-1.6885	0.0057	GOBP_T_CELL_APOPTOTIC_PROCESS	T CELL APOPTOTIC PROCESS
Leukocyte apoptosis	2.30103	-2.30103	-0.4625	0.0444	BBC3|PIP|IDO1|BCL3|IL7R|LGALS16|MIR17HG|MYC|JAK3|KIFAP3|PERP|IL2|PTCRA|LGALS9|CCL5|CD3G|ZC3H8|RIPK3|CD74|HIF1A|IRS2|TSC22D3|PRELID1|MIF|BCL2L11|FNIP1|ADAM8|PDCD1|P2RX7|PRKD2|GIMAP8|ORMDL3|PRKCQ|ADA|RAG1|ST3GAL1|AURKB|LGALS3|BAX|BCL10|BCL2|BCL6|RORC|TGFB2|HSH2D|BTK|LYN|NOC2L|FOXP1|CD27|DOCK8|BCL11B|IL10|SLC39A10|WNT5A|CD274|SLC46A2|TP53|BMP4|BIRC7|FADD|ARG2|EFNA1|GPAM	64	GOBP_REGULATION_OF_LYMPHOCYTE_APOPTOTIC_PROCESS	-1.7171	0.005	GOBP_REGULATION_OF_LYMPHOCYTE_APOPTOTIC_PROCESS	REGULATION OF LYMPHOCYTE APOPTOTIC PROCESS
Leukocyte apoptosis	2.45593	-2.45593	-0.5289	0.0347	BBC3|PRKCQ|PIP|ADA|IDO1|BCL3|IL7R|LGALS16|JAK3|KIFAP3|PERP|RAG1|ST3GAL1|LGALS3|PTCRA|LGALS9|BCL2|CCL5|RORC|ZC3H8|TGFB2|RIPK3|HIF1A|TSC22D3|PRELID1|BCL2L11|CD27|DOCK8|BCL11B|ADAM8|WNT5A|CD274|PDCD1|SLC46A2|TP53|P2RX7|BMP4|PRKD2|FADD|GIMAP8|ARG2|EFNA1|GPAM	43	GOBP_REGULATION_OF_T_CELL_APOPTOTIC_PROCESS	-1.7958	0.0035	GOBP_REGULATION_OF_T_CELL_APOPTOTIC_PROCESS	REGULATION OF T CELL APOPTOTIC PROCESS
Leukocyte apoptosis	3.22185	3.22185	0.3281	0.0093	ROCK2|USP2|TNFRSF11A|ZFHX3|COL6A1|USP7|ENOX2|HAS2|HUWE1|CASP2|EGR3|SLIT2|EZH2|F7|HNRNPD|PIWIL2|AXL|PCNA|EREG|ID2|KLF10|TARDBP|TOP1|NAMPT|NCOA1|NCOA2|PPARG|SUV39H1|CRY1|MMP2|MYBBP1A|MSTN|SIK1|CREB1|PML|CSF2|ATOH7|CUL4A|FOXO3|BHLHE40|KDM2A|LGR4|BHLHE41|FZD4|PPP1CC|TGFB2|BLOC1S6|DDB1|HNF4A|MAPK10|TGFB3|CRH|MDK|KDM5A|KDM5C|NR5A1|MAPK8|NGF|RORA|NFYA|SGPL1|SIRT1|PGR|AGRP|HDAC1|MTTP|CAVIN3|NFIL3|HES7|NO…	301	GOBP_RHYTHMIC_PROCESS	1.5575	0.0006	GOBP_RHYTHMIC_PROCESS	RHYTHMIC PROCESS
Leukocyte apoptosis	2.24413	2.24413	0.3816	0.0482	ROCK2|USP2|GHRH|GHRHR|ZFHX3|PROX1|USP7|MAPK9|FBXW11|FBXW7|EZH2|HNRNPD|PIWIL2|ID2|KLF10|NKX2-1|TARDBP|ADCY1|NLGN1|PPARG|CRY1|SIK1|MAGEL2|PML|CSF2|ATOH7|BHLHE40|KDM2A|SIAH2|PPP1CC|DDB1|HNF4A|MAPK10|USP9X|CRH|MTOR|NOCT|MAPK8|GNAQ|OPN3|RORA|BTRC|PDE6B|TOP2A|ADORA2A|KAT5|TP53|MAGED1|PHLPP1|CCAR2|ADRB1|CRY2|GSK3B|PPP1CA|BMAL1|CLOCK|NONO|NR1D1|NR1H3|OPN4|OPN5|CRTC1|CHRNB2|PARP1|SOX14|DRD2|GNA11|PPARA|DR…	115	GOBP_REGULATION_OF_CIRCADIAN_RHYTHM	1.5923	0.0057	GOBP_REGULATION_OF_CIRCADIAN_RHYTHM	REGULATION OF CIRCADIAN RHYTHM
Microtubule Organizing Center Dynamics	4	4	0.3848	0.002	CETN2|BNIP2|CETN3|CHD3|ROCK2|CHORDC1|BRSK1|CTNNB1|NUBP1|VPS4B|CKAP5|UBXN2B|WDR62|WDR90|CNTLN|CNTROB|ODF2|XPO1|ALMS1|XRCC3|CROCC|CSAG1|E2F4|CENPJ|CEP120|PDE4DIP|XRCC2|CCDC42|PARD6G|PCLAF|FBXW11|CCNL1|CCNL2|DEUP1|PAFAH1B1|AURKA|CDK11A|GOLGA2|CDK11B|PLK4|POC1B|BRCA2|ARHGEF10|CHEK1|CHMP3|DCTN1|NDEL1|CCDC78|DZIP1|RAB6C|BBS4|FBXW5|GADD45A|RANBP1|PLK2|NPM1|GEN1|NUP62|OFD1|MARK4|SIRT1|PPP1R12A|HAUS1|HAUS…	162	GOBP_MICROTUBULE_ORGANIZING_CENTER_ORGANIZATION	1.7424	0.0001	GOBP_MICROTUBULE_ORGANIZING_CENTER_ORGANIZATION	MICROTUBULE ORGANIZING CENTER ORGANIZATION
Microtubule Organizing Center Dynamics	3.52288	3.52288	0.4438	0.005	CETN2|NDC80|ROCK2|CHORDC1|BRSK1|NUBP1|VPS4B|CKAP5|WDR62|WDR90|ITGB1BP2|CNTROB|XPO1|ALMS1|XRCC3|KIAA0753|CENPJ|CEP120|SPICE1|PDCD6IP|C10ORF90|CEP192|KAT2A|CEP63|DEUP1|CCDC15|CCDC57|PLK4|POC1B|BRCA2|KAT2B|CHMP1A|PKD2|BRCA1|CHMP1B|PKHD1|ARHGEF10|CHMP2A|CHMP2B|POC1A|POC5|CCNF|CHMP3|CHMP4B|CHMP4C|CHMP5|PPP1R35|CCP110|STIL|USP33|MDM1|RAB6C|RBM14|TMEM67|FBXW5|CDK5RAP2|PLK2|NPM1|GEN1|CENATAC|NUP62|OFD1|S…	81	GOBP_CENTROSOME_DUPLICATION	1.8134	0.0003	GOBP_CENTROSOME_DUPLICATION	CENTROSOME DUPLICATION
Mitochondrial ATP Production & Nucleotide Metabolism	4	-4	-0.4777	0	STAT3|UCK2|MTHFD1|STOML2|DNAJC30|ADSS1|ADSS2|ALDOA|MT-ATP6|MT-ATP8|MT-ND1|MT-ND2|MT-ND3|MT-ND4|MT-ND4L|MT-ND5|MT-ND6|ADCY9|NDUFAB1|NDUFA1|NPR1|NDUFA10|CTPS1|NDUFA11|ADK|NDUFA12|APRT|NDUFA13|ATIC|NDUFA2|ADCY5|GART|NDUFA3|ADCY6|NUDT2|NDUFA5|PAICS|ATP5MC1|NDUFA6|PPAT|TREM2|AMPD3|ATP5MC2|NDUFA7|AMPD1|ATP5MC3|NDUFA8|AMPD2|ATP5MGL|NDUFA9|UCK1|ADCY1|ATP5MJ|UCKL1|ADCY2|ATP5MK|NDUFB1|ADCY4|ATP6V0C|NDUFB10…	182	GOBP_RIBOSE_PHOSPHATE_BIOSYNTHETIC_PROCESS	-2.2272	0	GOBP_RIBOSE_PHOSPHATE_BIOSYNTHETIC_PROCESS	RIBOSE PHOSPHATE BIOSYNTHETIC PROCESS
Mitochondrial ATP Production & Nucleotide Metabolism	4	-4	-0.4108	0	STAT3|ACTN3|COL6A1|HSPA1A|HSPA1B|HSPA8|ALDOA|IFNG|OGDH|OGDHL|HIF1A|TPI1|NDUFAB1|SRC|SLC25A25|AK1|AK2|AK4|AK5|LETMD1|LIPA|TGFB1|BLOC1S6|GALK1|DDIT4|INSR|MAP2K1|MLXIPL|TSPO|GPI|TMSB4X|ATP6V1B1|HK2|CTNS|FKRP|ENO1|PGK1|ATP1B1|HTR2A|OGT|JMJD8|PARP1|NCOR1|FIGNL1|FLCN|PPARA|KAT2B|PPP2CA|ALDOB|P2RX7|UCHL1|GPD1|ATP1A2|ANTKMT|ARL2|ATP5F1A|ATP5F1B|ATP5F1C|ATP5F1D|ATP5F1E|ATP5F1EP2|ATP5IF1|ATP5ME|ATP5MF|ATP5…	236	GOBP_ATP_METABOLIC_PROCESS	-1.9793	0	GOBP_ATP_METABOLIC_PROCESS	ATP METABOLIC PROCESS
Mitochondrial ATP Production & Nucleotide Metabolism	4	-4	-0.5824	0	STAT3|STOML2|DNAJC30|ALDOA|MT-ATP6|MT-ATP8|MT-ND1|MT-ND2|MT-ND3|MT-ND4|MT-ND4L|MT-ND5|MT-ND6|NDUFAB1|NDUFA1|NDUFA10|NDUFA11|NDUFA12|NDUFA13|NDUFA2|NDUFA3|NUDT2|NDUFA5|ATP5MC1|NDUFA6|TREM2|ATP5MC2|NDUFA7|ATP5MC3|NDUFA8|ATP5MGL|NDUFA9|ATP5MJ|ATP5MK|NDUFB1|ATP6V0C|NDUFB10|COX11|NDUFB11|DMAC2L|MIR675|NDUFB2|LDHC|NDUFB3|NDUFB4|PID1|NDUFB5|PRKAG2|NDUFB6|TAFAZZIN|NDUFB7|VPS9D1|NDUFB8|NDUFB9|NDUFC1|NDUFC…	104	GOBP_ATP_BIOSYNTHETIC_PROCESS	-2.5261	0	GOBP_ATP_BIOSYNTHETIC_PROCESS	ATP BIOSYNTHETIC PROCESS
Mitochondrial ATP Production & Nucleotide Metabolism	4	-4	-0.3035	0.0001	ALDH1L1|ALDH1L2|STAT3|MTHFD1|MTHFD2L|AADAT|COL6A1|VNN1|ABCD1|ACOT1|DLD|ACOT11|DLST|ACOT2|GOT1|ACOT4|GOT2|ACOT6|ACOT7|IDH1|ACOT8|IDH2|ACOT9|ACSBG1|ACSBG2|ACSF2|OGDH|ACSF3|OGDHL|ACSL1|ACSL3|ACSL4|ACSL5|HIF1A|ACSL6|ACSM1|ACSM2A|ACSM2B|ACSM3|ACSM4|ACSM5|ACSM6|NDUFAB1|BAAT|CBR4|DGAT1|DGAT2|ELOVL1|ELOVL2|ELOVL3|ELOVL4|ELOVL5|SLC17A1|ELOVL6|ELOVL7|ENSG00000293349|FAR1|FAR2|FITM2|GCDH|NAMPT|GLYAT|GPAT4|H…	576	GOBP_PURINE_CONTAINING_COMPOUND_METABOLIC_PROCESS	-1.6062	0	GOBP_PURINE_CONTAINING_COMPOUND_METABOLIC_PROCESS	PURINE CONTAINING COMPOUND METABOLIC PROCESS
Mitochondrial ATP Production & Nucleotide Metabolism	4	-4	-0.4764	0	STING1|COX17|CYC1|SLC47A2|GHITM|LETM1|SLC18B1|MT-ATP6|MT-ATP8|MT-CO1|ATP1A4|MT-CO2|MT-CO3|MT-CYB|MT-ND1|SLC4A11|MT-ND2|MT-ND3|MT-ND4|MT-ND4L|MT-ND5|MT-ND6|MTCO2P12|NDUFA1|NDUFA10|NDUFA12|NDUFA2|NDUFA3|SLC25A3|NDUFA4|NDUFA5|ATP5MC1|NDUFA6|SLC9A8|ATP5MC2|NDUFA7|ATP5MC3|NDUFA8|ATP5MGL|NDUFA9|NDUFB1|ATP6V0C|NDUFB10|SLC18A1|DMAC2L|NDUFB2|SLC18A2|NDUFB3|NOX5|NDUFB4|NDUFB5|NDUFB6|NDUFB7|TMCO3|NDUFB8|NDU…	187	GOBP_PROTON_TRANSMEMBRANE_TRANSPORT	-2.2017	0	GOBP_PROTON_TRANSMEMBRANE_TRANSPORT	PROTON TRANSMEMBRANE TRANSPORT
Mitochondrial ATP Production & Nucleotide Metabolism	4	-4	-0.5315	0	STAT3|UCK2|STOML2|DNAJC30|ALDOA|MT-ATP6|MT-ATP8|MT-ND1|MT-ND2|MT-ND3|MT-ND4|MT-ND4L|MT-ND5|MT-ND6|NDUFAB1|NDUFA1|NDUFA10|CTPS1|NDUFA11|ADK|NDUFA12|NDUFA13|NDUFA2|NDUFA3|TYMS|NUDT2|NDUFA5|ATP5MC1|NDUFA6|TREM2|ATP5MC2|NDUFA7|ATP5MC3|NDUFA8|ATP5MGL|NDUFA9|UCK1|ATP5MJ|UCKL1|ATP5MK|NDUFB1|ATP6V0C|NDUFB10|TBPL1|COX11|NDUFB11|DMAC2L|MIR675|NDUFB2|LDHC|NDUFB3|NDUFB4|PID1|NDUFB5|PRKAG2|NDUFB6|TAFAZZIN|NDU…	129	GOBP_NUCLEOSIDE_TRIPHOSPHATE_BIOSYNTHETIC_PROCESS	-2.3693	0	GOBP_NUCLEOSIDE_TRIPHOSPHATE_BIOSYNTHETIC_PROCESS	NUCLEOSIDE TRIPHOSPHATE BIOSYNTHETIC PROCESS
Mitochondrial ATP Production & Nucleotide Metabolism	4	-4	-0.4428	0	STAT3|UCK2|MTHFD1|MTHFD2L|ALDOA|IDH2|NAPRT|NDUFAB1|NPR1|NAMPT|AK1|AK2|AK3|AK4|AK5|GARS1|LETMD1|KARS1|LIPA|TGFB1|PRPS1|PRPS1L1|PRPS2|PRPSAP1|MAP2K1|PRPSAP2|RRM2|TMSB4X|ADCY7|AK9|UPRT|ENO1|CDA|CMPK1|CTPS2|DCK|DCTD|NMNAT2|DHODH|DTYMK|DUT|PARP1|CMPK2|PPARA|GMPS|GUCY1A1|GUCY1A2|GUCY1B1|GUCY2C|ADSL|GUCY2D|ANTKMT|GUCY2F|GUK1|ATP5F1A|ATP5F1B|ATP5F1C|ATP5F1D|ATP5F1E|ATP5F1EP2|IMPDH1|ATP5IF1|IMPDH2|ATP5ME|…	227	GOBP_NUCLEOTIDE_BIOSYNTHETIC_PROCESS	-2.1175	0	GOBP_NUCLEOTIDE_BIOSYNTHETIC_PROCESS	NUCLEOTIDE BIOSYNTHETIC PROCESS
Mitochondrial ATP Production & Nucleotide Metabolism	4	-4	-0.4812	0	IDO1|STAT3|MTHFD1|STOML2|DGUOK|MTHFD2L|DNAJC30|ACMSD|ADSS1|ADSS2|AFMID|ALDOA|IDH2|MT-ATP6|MT-ATP8|MT-ND1|MT-ND2|MT-ND3|NAPRT|MT-ND4|MT-ND4L|MT-ND5|MT-ND6|ADCY9|NDUFAB1|NDUFA1|NPR1|NDUFA10|NDUFA11|ADK|NDUFA12|APRT|NDUFA13|ATIC|NDUFA2|ADCY5|GART|NDUFA3|ADCY6|NUDT2|NDUFA5|PAICS|ATP5MC1|NDUFA6|PPAT|TREM2|AMPD3|ATP5MC2|NDUFA7|AMPD1|ATP5MC3|NDUFA8|AMPD2|ATP5MGL|NAMPT|NDUFA9|ADCY1|ATP5MJ|ADCY2|ATP5MK|ND…	192	GOBP_PURINE_NUCLEOTIDE_BIOSYNTHETIC_PROCESS	-2.2487	0	GOBP_PURINE_NUCLEOTIDE_BIOSYNTHETIC_PROCESS	PURINE NUCLEOTIDE BIOSYNTHETIC PROCESS
Mitochondrial ATP Production & Nucleotide Metabolism	4	-4	-0.6029	0	STOML2|DNAJC30|MT-ATP6|MT-ATP8|MT-ND1|MT-ND2|MT-ND3|MT-ND4|MT-ND4L|MT-ND5|MT-ND6|NDUFAB1|NDUFA1|NDUFA10|NDUFA11|NDUFA12|NDUFA13|NDUFA2|NDUFA3|NDUFA5|ATP5MC1|NDUFA6|ATP5MC2|NDUFA7|ATP5MC3|NDUFA8|ATP5MGL|NDUFA9|ATP5MJ|ATP5MK|NDUFB1|ATP6V0C|NDUFB10|NDUFB11|NDUFB2|NDUFB3|NDUFB4|NDUFB5|NDUFB6|NDUFB7|VPS9D1|NDUFB8|NDUFB9|NDUFC1|NDUFC2|NDUFS1|NDUFS2|NDUFS3|NDUFS4|NDUFS5|NDUFS6|NDUFS7|NDUFS8|NDUFV1|NDUFV…	76	GOBP_PROTON_MOTIVE_FORCE_DRIVEN_ATP_SYNTHESIS	-2.4997	0	GOBP_PROTON_MOTIVE_FORCE_DRIVEN_ATP_SYNTHESIS	PROTON MOTIVE FORCE DRIVEN ATP SYNTHESIS
Mitochondrial ATP Production & Nucleotide Metabolism	4	-4	-0.3655	0	STAT3|UCK2|MTHFD1|MTHFD2L|DLD|ACOT7|ALDOA|IDH2|ACSBG1|ACSBG2|ACSF3|ACSL1|ACSL3|ACSL4|ACSL5|ACSL6|NAPRT|NDUFAB1|CBR4|NPR1|ELOVL1|ELOVL2|ELOVL3|ELOVL4|ELOVL5|ELOVL6|ELOVL7|GCDH|NAMPT|HACD1|HACD2|HSD17B12|HTD2|MMUT|PPT2|SLC27A2|TECR|AK1|AK2|AK3|AK4|AK5|GARS1|LETMD1|KARS1|LIPA|TGFB1|PRPS1|PRPS1L1|PRPS2|PRPSAP1|MAP2K1|PRPSAP2|RRM2|UGP2|TMSB4X|MPI|ADCY7|NAGK|AK9|ACAT1|ACLY|ACSS1|UPRT|ACSS2|BCKDK|DIP2A|…	318	GOBP_NUCLEOSIDE_PHOSPHATE_BIOSYNTHETIC_PROCESS	-1.8408	0	GOBP_NUCLEOSIDE_PHOSPHATE_BIOSYNTHETIC_PROCESS	NUCLEOSIDE PHOSPHATE BIOSYNTHETIC PROCESS
Mitochondrial ATP Production & Nucleotide Metabolism	2.60206	-2.60206	-0.252	0.0272	STAT3|UCK2|MTHFD1|TRIP11|ACOT8|FUT8|HAS1|HAS2|NDUFAB1|B3GALNT1|CHST14|CHST8|FUT10|TMEM258|FUT2|TMTC4|FUT4|FUT9|AK1|AK2|PGAP1|AK3|MGAT2|AK4|AK5|MPDU1|FUT1|PGM2|TGFB1|PRPS1|PRPS1L1|PRPS2|HS3ST5|PRPSAP1|GATA1|MAP2K1|PRPSAP2|ST3GAL4|ST3GAL6|UGP2|TMSB4X|MPI|ADCY7|XYLB|A3GALT2|A4GALT|A4GNT|ABO|AK9|ALG1|VANGL2|ALG10|ALG10B|ALG11|ALG12|B3GALT5|ALG13|ALG14|ALG1L2|ALG2|HS2ST1|ALG3|HS6ST1|ALG5|ALG6|CCL19|FK…	624	GOBP_CARBOHYDRATE_DERIVATIVE_BIOSYNTHETIC_PROCESS	-1.3574	0.0025	GOBP_CARBOHYDRATE_DERIVATIVE_BIOSYNTHETIC_PROCESS	CARBOHYDRATE DERIVATIVE BIOSYNTHETIC PROCESS
Mitochondrial ATP Production & Nucleotide Metabolism	4	-4	-0.3383	0.0002	STAT3|UCK2|MTHFD1|COL6A1|OGDH|OGDHL|HIF1A|NDUFAB1|SRC|SLC25A25|AK1|AK2|AK3|AK4|AK5|TGFB1|PRPS1|PRPS1L1|PRPS2|PRPSAP1|INSR|MAP2K1|PRPSAP2|MLXIPL|TSPO|GPI|RORA|TMSB4X|ATP6V1B1|DLG2|ADCY7|HK2|AK9|CTNS|FKRP|PGK1|CDA|CMPK1|CTPS2|DCK|ATP1B1|HTR2A|DHODH|JMJD8|ENTPD5|CACNB4|PPARA|ENTPD7|KAT2B|P2RX7|UCHL1|GMPS|GUCY1A1|GUCY1A2|GUCY1B1|GUCY2C|ADSL|ATP1A2|GUCY2D|ANTKMT|GUCY2F|ARL2|GUK1|ATP5F1A|ATP5F1B|ATP5F1…	385	GOBP_RIBOSE_PHOSPHATE_METABOLIC_PROCESS	-1.728	0	GOBP_RIBOSE_PHOSPHATE_METABOLIC_PROCESS	RIBOSE PHOSPHATE METABOLIC PROCESS
Mitochondrial ATP Production & Nucleotide Metabolism	4	-4	-0.3866	0	STAT3|UCK2|ACTN3|COL6A1|HSPA1A|HSPA1B|HSPA8|ALDOA|IFNG|OGDH|OGDHL|HIF1A|TPI1|NDUFAB1|SRC|SLC25A25|AK1|AK2|AK3|AK4|AK5|LETMD1|LIPA|TGFB1|BLOC1S6|GALK1|DDIT4|INSR|MAP2K1|LRRK2|MLXIPL|TSPO|GPI|TMSB4X|ATP6V1B1|HK2|CTNS|FKRP|ENO1|PGK1|CTPS2|ATP1B1|HTR2A|OGT|JMJD8|DTYMK|DUT|PARP1|CMPK2|NCOR1|FIGNL1|FLCN|PPARA|ENTPD7|KAT2B|PPP2CA|ALDOB|P2RX7|UCHL1|GPD1|ATP1A2|ANTKMT|ARL2|GUK1|ATP5F1A|ATP5F1B|ATP5F1C|ATP…	283	GOBP_NUCLEOSIDE_TRIPHOSPHATE_METABOLIC_PROCESS	-1.9182	0	GOBP_NUCLEOSIDE_TRIPHOSPHATE_METABOLIC_PROCESS	NUCLEOSIDE TRIPHOSPHATE METABOLIC PROCESS
Mitochondrial ATP Production & Nucleotide Metabolism	4	-4	-0.3233	0.0001	ALDH1L1|ALDH1L2|STAT3|UCK2|MTHFD1|MTHFD2L|COL6A1|GOT1|GOT2|IDH1|IDH2|OGDH|OGDHL|HIF1A|NDUFAB1|NAMPT|SRC|SLC25A25|AK1|AK2|AK3|AK4|AK5|PGD|TGFB1|PRPS1|PRPS1L1|PRPS2|PRPSAP1|INSR|LDHB|MAP2K1|PRPSAP2|MLXIPL|PC|TSPO|GPI|RORA|DERA|TMSB4X|ATP6V1B1|DLG2|ADCY7|RBKS|HK2|AK9|CNP|CTNS|FKRP|PGK1|CDA|CMPK1|ACACB|CTPS2|DCK|DCTD|ATP1B1|DCXR|HTR2A|DHODH|JMJD8|DTYMK|DUT|ENTPD5|CACNB4|CMPK2|PPARA|ENTPD7|KAT2B|P2RX7…	500	GOBP_NUCLEOTIDE_METABOLIC_PROCESS	-1.69	0	GOBP_NUCLEOTIDE_METABOLIC_PROCESS	NUCLEOTIDE METABOLIC PROCESS
Mitochondrial ATP Production & Nucleotide Metabolism	4	-4	-0.4148	0	STAT3|MTHFD1|MTHFD2L|DLD|ACOT7|ALDOA|IDH2|ACSBG1|ACSBG2|ACSF3|ACSL1|ACSL3|ACSL4|ACSL5|ACSL6|NAPRT|NDUFAB1|CBR4|NPR1|ELOVL1|ELOVL2|ELOVL3|ELOVL4|ELOVL5|ELOVL6|ELOVL7|GCDH|NAMPT|HACD1|HACD2|HSD17B12|HTD2|MMUT|PPT2|SLC27A2|TECR|AK1|AK2|AK3|AK4|AK5|LETMD1|PGM2|LIPA|TGFB1|PRPS1|PRPS1L1|PRPS2|PRPSAP1|MAP2K1|PRPSAP2|TMSB4X|ADCY7|ACAT1|ACLY|ACSS1|ACSS2|BCKDK|DIP2A|DLAT|MLYCD|MPC2|PDHA1|PDHA2|PDHB|ENO1|PD…	259	GOBP_PURINE_CONTAINING_COMPOUND_BIOSYNTHETIC_PROCESS	-2.0351	0	GOBP_PURINE_CONTAINING_COMPOUND_BIOSYNTHETIC_PROCESS	PURINE CONTAINING COMPOUND BIOSYNTHETIC PROCESS
Mitochondrial ATP Production & Nucleotide Metabolism	4	-4	-0.6212	0	SNCA|DNAJC15|DLD|MT-ND1|MT-ND2|MT-ND3|MT-ND4|MT-ND4L|MT-ND5|ISCU|MT-ND6|NDUFAB1|NDUFA1|NDUFA10|NDUFA11|NDUFA2|NDUFA3|NDUFA4|NDUFA5|NDUFA6|NDUFA7|NDUFA8|NDUFA9|NDUFAF1|NDUFB1|NDUFB10|NDUFB2|NDUFB3|NDUFB4|NDUFB5|NDUFB6|NDUFB7|NDUFB8|NDUFB9|NDUFC1|NDUFC2|NDUFC2-KCTD14|NDUFS1|NDUFS2|NDUFS3|NDUFS4|NDUFS5|NDUFS6|NDUFS7|NDUFS8|NDUFV1|NDUFV2|NDUFV3|PINK1|COQ9|PARK7|MIR210	52	GOBP_MITOCHONDRIAL_ELECTRON_TRANSPORT_NADH_TO_UBIQUINONE	-2.3659	0	GOBP_MITOCHONDRIAL_ELECTRON_TRANSPORT_NADH_TO_UBIQUINONE	MITOCHONDRIAL ELECTRON TRANSPORT NADH TO UBIQUINONE
Mitochondrial Membrane Organization & Transport	3.69897	-3.69897	-0.4054	0.0035	SNCA|STAT3|GHITM|HSPA1A|IMMT|ROMO1|CHCHD6|LETM1|ARHGAP11B|TMEM126A|MTCH2|TIMM10|ATF2|SIVA1|TIMM13|TOMM7|TIMM22|TOMM70|TIMM29|TMEM11|TIMM8A|NDUFA13|TIMM8B|PEX5|TIMM9|TOMM20|GCLC|BCL2L1|TOMM22|TOMM40|EYA2|TOMM5|TOMM6|TRMT10B|MIR29A|MIR29B1|TAFAZZIN|MIR29C|AFG3L2|AP3B1|OXA1L|SLC25A31|BAX|PINK1|BCL2|PPIF|SLC25A6|LRRK2|MTCH1|UQCC3|BLOC1S2|MIR17|GSK3A|TP53|HK2|MTX1|BNIP3|PPM1K|BNIP3L|SPG7|BOK|BAD|FZD9|…	119	GOBP_MITOCHONDRIAL_MEMBRANE_ORGANIZATION	-1.8153	0.0002	GOBP_MITOCHONDRIAL_MEMBRANE_ORGANIZATION	MITOCHONDRIAL MEMBRANE ORGANIZATION
Mitochondrial Membrane Organization & Transport	3.22185	-3.22185	-0.5401	0.0096	AP3B1|MTX2|ROMO1|OXA1L|BAX|MOAP1|TIMM10B|AGK|CALM3|TMEM126A|MTCH1|MTCH2|TIMM10|TIMM13|SAMM50|TOMM7|TIMM22|BCS1L|TOMM70|TIMM29|TIMM8A|NDUFA13|TIMM8B|TIMM9|MAIP1|COX18|TOMM20|TOMM22|TOMM40|TOMM5|TOMM6|TRMT10B|MTX1	33	GOBP_ESTABLISHMENT_OF_PROTEIN_LOCALIZATION_TO_MITOCHONDRIAL_MEMBRANE	-1.8786	0.0006	GOBP_ESTABLISHMENT_OF_PROTEIN_LOCALIZATION_TO_MITOCHONDRIAL_MEMBRANE	ESTABLISHMENT OF PROTEIN LOCALIZATION TO MITOCHONDRIAL MEMBRANE
Mitochondrial Membrane Organization & Transport	2.284	-2.284	-0.3179	0.0456	STAT3|DNAJC15|COL6A1|GHITM|HSP90AA1|ABCB8|HSPA1A|CCDC51|ROMO1|HSPD1|DNAJC19|LETM1|SLC25A28|SLC25A36|ARHGAP11B|VPS35|MTCH2|TIMM10|ATF2|SIVA1|TIMM13|TIMM17A|TIMM23|TIMM17B|TOMM7|TIMM22|TIMM23B|TOMM70|TIMM29|TIMM44|TIMM8A|NDUFA13|TIMM8B|TIMM9|PNPT1|SLC25A3|BHLHA15|FLVCR1|TOMM20|GCLC|TOMM20L|BCL2L1|TOMM22|TOMM40|TOMM40L|EYA2|TOMM5|TOMM6|TRMT10B|MIR29A|MIR29B1|MIR29C|AFG3L2|SLC25A23|SLC25A24|SLC25A31|…	183	GOBP_MITOCHONDRIAL_TRANSPORT	-1.4979	0.0052	GOBP_MITOCHONDRIAL_TRANSPORT	MITOCHONDRIAL TRANSPORT
Mitochondrial translation	4	-4	-0.3652	0.0012	TFB2M|MTERF2|MTERF4|MIURF|MPV17L2|MRPS2|MRPS7|MTERF3|MTG1|MTG2|RCC1L|SUPV3L1|GFM2|PNPT1|THAP11|MRPL58|MTIF2|ANGEL2|MTIF3|MTRES1|MTRF1|MTRF1L|AARS2|MRPL41|MRPS30|HSD17B10|DARS2|EARS2|GARS1|GATB|GATC|FOXO3|HARS1|OXA1L|IARS2|LARS2|KANSL1|KANSL3|MRPL18|SHMT2|TRNT1|QRSL1|SLC25A33|RARS2|TEFM|SARS2|TARS2|UQCC2|WARS2|C1QBP|YARS2|LRPPRC|METTL4|CHCHD1|GADD45GIP1|GFM1|MALSU1|MRPL1|MRPL10|MRPL11|MRPL12|MRPL1…	170	GOBP_MITOCHONDRIAL_GENE_EXPRESSION	-1.7169	0.0001	GOBP_MITOCHONDRIAL_GENE_EXPRESSION	MITOCHONDRIAL GENE EXPRESSION
Mitochondrial translation	4	-4	-0.4496	0	MIURF|MPV17L2|MRPS2|MRPS7|MTG1|MTG2|RCC1L|GFM2|MRPL58|MTIF2|MTIF3|MTRF1|MTRF1L|AARS2|MRPL41|MRPS30|DARS2|EARS2|GARS1|GATB|GATC|HARS1|OXA1L|IARS2|LARS2|MRPL18|SHMT2|QRSL1|RARS2|SARS2|TARS2|UQCC2|WARS2|C1QBP|YARS2|LRPPRC|CHCHD1|GADD45GIP1|GFM1|MALSU1|MRPL1|MRPL10|MRPL11|MRPL12|MRPL13|MRPL14|MRPL15|MRPL16|MRPL17|NGRN|MRPL19|DAP3|MRPL2|MRPL20|MRPL21|MRPL22|MRPL23|MRPL24|MRPL27|MRPL28|AURKAIP1|MRPL3|M…	132	GOBP_MITOCHONDRIAL_TRANSLATION	-2.0638	0	GOBP_MITOCHONDRIAL_TRANSLATION	MITOCHONDRIAL TRANSLATION
Myeloid/Lymphocyte Chemotaxis Programs	3.52288	-3.52288	-0.4649	0.0046	SPN|LRP12|S1PR1|MADCAM1|LGALS9|ECM1|RIPK3|AKT1|ITGB3|ITGA4|ITGB7|CH25H|FUT4|KLRC4-KLRK1|KLRK1|CYP7B1|APP|ARTN|HSD3B7|WNK1|SPNS2|RET|ZAP70|P4HB|CXCL10|CXCL11|CXCR3|AIF1|ITGAL|LRCH1|GPR15|MED23|CKLF|DOCK8|CCL21|GAS6|TNFRSF14|ADAM17|CCL26|CCR7|MSMP|WNT5A|AIRE|OXSR1|PADI2|ASCL2|IL27RA|NEDD9|STK39|XCL1|RIPOR2|MSN|CCR2|CCR6|STK10|DEFA1|DEFA1B|DEFA4|S100A7|CCL5|CORO1A|CD200|ADTRP|CD69|CRK|APOD|CD200R1|C…	114	GOBP_LYMPHOCYTE_MIGRATION	-1.8859	0.0003	GOBP_LYMPHOCYTE_MIGRATION	LYMPHOCYTE MIGRATION
Myeloid/Lymphocyte Chemotaxis Programs	2.85387	-2.85387	-0.4255	0.0176	SYK|EDN3|PF4V1|PPBP|IL23A|IL17RC|CAMK1D|S100A12|IL34|EDN2|DPP4|TNFAIP6|SLAMF1|ANXA1|PRTN3|CSF1|SLAMF8|IL1B|JAM3|SLIT2|ITGB2|DPEP1|IRAK4|DAPK2|ADGRE2|MSTN|FUT4|MIR223|MYD88|VAV1|LBP|VAV3|PECAM1|LGALS3|TIRAP|CXCR2|TGFB2|CXCL10|CXCL9|BST1|MDK|JAML|MAPK1|C1QBP|MPP1|AKIRIN1|CKLF|THBS1|TREM1|C3AR1|CCL11|CCL21|CCL24|CCL26|IL17A|MOSPD2|C5AR1|CCR7|C5AR2|IL17RA|TRPV4|PPIA|IL1R1|NCKAP1L|SRP54|CSF3R|PPIB|XCL…	148	GOBP_GRANULOCYTE_MIGRATION	-1.7922	0.0014	GOBP_GRANULOCYTE_MIGRATION	GRANULOCYTE MIGRATION
Myeloid/Lymphocyte Chemotaxis Programs	2.76955	-2.76955	-0.4384	0.02	HMGB1|SPN|MADCAM1|LGALS9|MMP14|IL34|SLAMF1|ITGB3|ITGA4|CSF1|JAM3|CCR1|TREM2|MSTN|SPI1|CREB3|APP|LGALS3|WNK1|P4HB|TGFB1|PLA2G7|CXCL10|MDK|AIF1|CALR|MAPK1|P2RX4|MED23|C1QBP|AKIRIN1|THBS1|C3AR1|DOCK8|CCL21|GAS6|IL12A|TNFRSF14|ADAM17|MOSPD2|C5AR1|CCR7|WNT5A|CD47|TRPV4|OXSR1|PDGFD|ASCL2|NEDD9|STK39|XCL1|CCR2|CCR6|S100A7|CCL5|CORO1A|SERPINE1|CSF1R|MAPK3|CX3CL1|CD99L2|CX3CR1|CXCL12|CXCL13|TMEM102|CMKLR1…	98	GOBP_POSITIVE_REGULATION_OF_MONONUCLEAR_CELL_MIGRATION	-1.748	0.0017	GOBP_POSITIVE_REGULATION_OF_MONONUCLEAR_CELL_MIGRATION	POSITIVE REGULATION OF MONONUCLEAR CELL MIGRATION
Myeloid/Lymphocyte Chemotaxis Programs	4	-4	-0.4443	0.0001	SPN|TNFRSF11A|TNFSF11|S1PR1|DUSP1|ECM1|EDN2|ANXA1|EMILIN1|ITGA4|CSF1|ITGB7|SLIT2|CCR5|CCR1|CH25H|MMP2|ARHGEF5|MSTN|FUT4|KLRC4-KLRK1|SPI1|KLRK1|CYP7B1|FLT1|CREB3|ASB2|ARTN|LGALS3|CXCR2|RET|BCR|P4HB|TGFB1|H2BC1|LYN|MDK|ITGAL|CALR|JAML|MAPK1|LRCH1|GPR15|GREM1|MED23|AKIRIN1|CKLF|MIR146A|THBS1|DDT|DOCK8|CCL21|MICOS10-NBL1|TNFRSF14|ADAM17|CCL26|MMP28|MOSPD2|TRPM2|CCR7|MSMP|WNT5A|MTUS1|CD47|NBL1|PLG|TRP…	235	GOBP_MONONUCLEAR_CELL_MIGRATION	-2.0374	0	GOBP_MONONUCLEAR_CELL_MIGRATION	MONONUCLEAR CELL MIGRATION
Myeloid/Lymphocyte Chemotaxis Programs	2.36653	-2.36653	-0.3668	0.0407	HMGB1|SPN|VEGFB|VEGFC|LYVE1|VEGFD|EDN3|IL23A|MADCAM1|SELE|LGALS9|CAMK1D|MMP14|THY1|ZP3|IL34|EDN2|SLAMF1|ITGA2|ITGB3|ITGA4|CSF1|JAM3|KITLG|F7|CCR1|TREM2|DAPK2|MSTN|FUT4|SPI1|SWAP70|TNFRSF18|CREB3|APP|LBP|TACR1|LGALS3|WNK1|PGF|TIRAP|P4HB|TGFB1|PLA2G7|CXCL10|MDK|AIF1|CALR|MAPK1|P2RX4|MED23|C1QBP|AKIRIN1|THBS1|C3AR1|DOCK8|CCL21|GPSM3|CCL24|GAS6|IL12A|TNFRSF14|ADAM17|MOSPD2|C5AR1|CCR7|WNT5A|CD47|TRPV4…	152	GOBP_POSITIVE_REGULATION_OF_LEUKOCYTE_MIGRATION	-1.5903	0.0043	GOBP_POSITIVE_REGULATION_OF_LEUKOCYTE_MIGRATION	POSITIVE REGULATION OF LEUKOCYTE MIGRATION
Myeloid/Lymphocyte Chemotaxis Programs	2.88606	-2.88606	-0.4601	0.0163	SYK|EDN3|PF4V1|PPBP|IL23A|IL17RC|CAMK1D|S100A12|IL34|EDN2|DPP4|TNFAIP6|SLAMF1|ANXA1|CSF1|IL1B|JAM3|SLIT2|ITGB2|DPEP1|DAPK2|ADGRE2|MSTN|MIR223|VAV1|LBP|VAV3|LGALS3|TIRAP|CXCR2|TGFB2|CXCL10|CXCL9|BST1|MDK|JAML|MAPK1|C1QBP|MPP1|AKIRIN1|CKLF|THBS1|TREM1|C3AR1|CCL11|CCL21|CCL24|CCL26|MOSPD2|C5AR1|CCR7|C5AR2|IL17RA|TRPV4|PPIA|NCKAP1L|SRP54|CSF3R|PPIB|XCL1|RIPOR2|PERP|DNM1L|CCL19|PF4|S100A7|CCL5|CXCR1|S…	121	GOBP_GRANULOCYTE_CHEMOTAXIS	-1.8353	0.0013	GOBP_GRANULOCYTE_CHEMOTAXIS	GRANULOCYTE CHEMOTAXIS
Myeloid/Lymphocyte Chemotaxis Programs	4	-4	-0.4102	0.0001	VEGFB|TNFRSF11A|VEGFC|TNFSF11|VEGFD|EDN3|S1PR1|ENG|DUSP1|SEMA5A|CAMK1D|EDN2|DPP4|EGR3|HBEGF|ANXA1|AGTR1|CSF1|IL1B|SLIT2|CCR5|EPHB1|ITGB2|F7|CCR1|VCAM1|CH25H|MIR16-1|SBDS|ARHGEF16|DAPK2|MMP2|FGF16|ARHGEF5|FGF18|MSTN|KLRC4-KLRK1|SPI1|KLRK1|SWAP70|CYP7B1|FLT1|CREB3|LBP|LGALS3|TIRAP|BCAR1|CXCR2|FGFR1|TGFB2|GAB1|BST1|LYN|MDK|CALR|JAML|MAPK1|GREM1|TMSB4X|AKIRIN1|BIN2|CKLF|THBS1|TREM1|DDT|CCL11|DOCK4|CC…	328	GOBP_CELL_CHEMOTAXIS	-1.9306	0	GOBP_CELL_CHEMOTAXIS	CELL CHEMOTAXIS
Myeloid/Lymphocyte Chemotaxis Programs	3.1549	-3.1549	-0.3054	0.01	CDH13|SPN|TNFRSF11A|TNFSF11|EDN3|S1PR1|DSCAM|ENG|ENPP2|DUSP1|SEMA5A|EFNB2|ECSCR|EDN2|WNT7B|DPP4|EGR3|HBEGF|ITGA2|CSF1|PLGRKT|SLIT2|EPHB1|SMAD3|F7|LTB4R2|MEGF8|MIR16-1|POU4F2|DAPK2|MMP2|FGF16|FGF18|MSTN|NRP2|SPI1|MAPK14|SWAP70|FLT1|UNC5C|TIRAP|SEMA3A|TGFB1|SEMA3B|TGFB2|FEZF2|SEMA3C|GAB1|SEMA3D|SEMA3E|SEMA3F|MAP2K1|SEMA3G|MDK|SEMA4B|SEMA4C|SEMA4D|SEMA4F|SEMA4G|SEMA5B|SEMA6A|SEMA6B|SEMA6C|SEMA6D|GPN…	473	GOBP_TAXIS	-1.5338	0.0007	GOBP_TAXIS	TAXIS
Myeloid/Lymphocyte Chemotaxis Programs	2.25181	-2.25181	-0.6433	0.0482	STK39|XCL1|GPR183|CCR2|DEFA1|WNK1|DEFA1B|DEFA4|S100A7|CCL5|CXCL10|CXCL11|CXCR3|PIK3CD|SLC12A2|CXCL12|CXCL13|CCL3|TMEM102|CCL21|CXCL16|TNFSF14|ADAM17|CCL26|PIK3CG|WNT5A|ADAM10|OXSR1|PLEC	29	GOBP_T_CELL_CHEMOTAXIS	-1.8317	0.0056	GOBP_T_CELL_CHEMOTAXIS	T CELL CHEMOTAXIS
Myeloid/Lymphocyte Chemotaxis Programs	2.67778	-2.67778	-0.5716	0.0237	KLRC4-KLRK1|NEDD9|STK39|XCL1|KLRK1|CCL2|GPR183|CYP7B1|HSD3B7|CCR2|DEFA1|WNK1|DEFA1B|DEFA4|S100A7|CCL5|CXCL10|CXCL11|CXCR3|PTK2B|CX3CL1|PIK3CD|SLC12A2|CXCL12|CXCL13|CCL3|TMEM102|CCL4|CKLF|GPR15LG|SLC8B1|CCL7|CCL21|CXCL16|TNFSF14|GAS6|ADAM17|CCL26|PIK3CG|CH25H|ADAM8|MSMP|WNT5A|ADAM10|OXSR1|PADI2|SAA1|PLEC	48	GOBP_LYMPHOCYTE_CHEMOTAXIS	-1.8632	0.0021	GOBP_LYMPHOCYTE_CHEMOTAXIS	LYMPHOCYTE CHEMOTAXIS
Myeloid/Lymphocyte Chemotaxis Programs	3.69897	-3.69897	-0.6237	0.0043	HMGB1|TNFRSF11A|TNFSF11|NINJ1|DUSP1|CCR2|PF4|RPS19|S100A12|S100A7|CCL5|SERPINE1|ANXA1|SLAMF8|SLIT2|CALCA|CCR1|FOLR2|CX3CR1|CXCL12|PTPRO|ANO6|DEFB104A|DEFB104B|CCL2|FLT1|CREB3|APP|DEFB124|LGMN|LGALS3|PLA2G7|CXCL10|LYN|AIF1|CCL1|IL6|IL6R|S100A14|GREM1|CCL23|FPR2|CCL3|CCL7|MICOS10-NBL1|CCL26|MOSPD2|PDGFB|MSMP|CXCL17|CTSG|NBL1|TNFSF18|DEFB131A|CCN3	55	GOBP_MONOCYTE_CHEMOTAXIS	-2.058	0.0002	GOBP_MONOCYTE_CHEMOTAXIS	MONOCYTE CHEMOTAXIS
Myeloid/Lymphocyte Chemotaxis Programs	3.09691	-3.09691	-0.6144	0.0109	STAP1|CCL2|PTPRJ|EDNRB|RPL13A|LGALS3|CCL5|AZU1|IL34|EDN2|PTK2B|SLAMF1|MDK|CSF1R|MAPK1|MAPK3|CSF1|SLAMF8|CX3CL1|AKIRIN1|CCL3|MIF|CKLF|THBS1|C3AR1|DDT|SFTPD|CMKLR1|MMP28|C5|C5AR1|CXCL17|MTUS1|TRPV4|NUP85|TNFSF18|CYP19A1|SAA1|MMP2|RARRES2|MSTN|PTK2|TAFA4	43	GOBP_MACROPHAGE_CHEMOTAXIS	-1.9456	0.0008	GOBP_MACROPHAGE_CHEMOTAXIS	MACROPHAGE CHEMOTAXIS
Myeloid/Lymphocyte Chemotaxis Programs	2.69897	-2.69897	-0.4696	0.0231	STK39|XCL1|RIPOR2|SPN|S1PR1|MSN|CCR2|CCR6|DEFA1|DEFA1B|LGALS9|DEFA4|ECM1|S100A7|CCL5|CORO1A|CD200|RIPK3|CD69|CRK|ITGB3|ITGA4|ITGB7|APOD|CD200R1|CD99|XG|CD99L2|PIK3CD|CXCL12|CXCL13|TMEM102|CXCL16|ADAM8|MYO1G|CRKL|PLEC|CCL2|GPR183|GNAI1|APP|WNK1|SPNS2|ZAP70|P4HB|CXCL10|CXCL11|FUT7|CXCR3|AIF1|F11R|ICAM1|PYCARD|ITGAL|LRCH1|GPR15|CCL20|MED23|SLC12A2|CCL3|SELENOK|RHOA|DOCK8|GPR15LG|CCL21|TNFSF14|TNFRSF…	79	GOBP_T_CELL_MIGRATION	-1.7611	0.002	GOBP_T_CELL_MIGRATION	T CELL MIGRATION
Myeloid/Lymphocyte Chemotaxis Programs	3.09691	-3.09691	-0.5316	0.0115	STAP1|CCR2|MMP14|CNN2|CCL5|AZU1|IL34|EDN2|CD200|SLAMF1|CD81|CSF1R|EMILIN1|MAPK3|CSF1|MCOLN2|SLAMF8|CD200R1|CX3CL1|CX3CR1|MIF|TREM2|SFTPD|CMKLR1|MIR24-1|MMP2|RARRES2|MSTN|PTK2|B4GALT1|MIR128-1|CCL2|PTPRJ|EDNRB|CD9|RPL13A|LGALS3|BCR|PTK2B|MDK|P2RY12|MAPK1|RTN4|P2RX4|AKIRIN1|CCL3|CKLF|THBS1|C3AR1|DDT|MMP28|C5|C5AR1|CXCL17|MTUS1|TRPV4|NUP85|TNFSF18|TRIM55|CYP19A1|SAA1|TAFA4	62	GOBP_MACROPHAGE_MIGRATION	-1.8593	0.0008	GOBP_MACROPHAGE_MIGRATION	MACROPHAGE MIGRATION
Myeloid/Lymphocyte Chemotaxis Programs	3.69897	-3.69897	-0.4292	0.0036	STAP1|HMGB1|SPN|DUSP1|MADCAM1|LGALS9|MMP14|ECM1|IL34|RIPK3|SLAMF1|AKT1|EMILIN1|ITGB3|ITGA4|CSF1|SLAMF8|JAM3|SLIT2|CCR1|MIF|TREM2|MIR24-1|MSTN|KLRC4-KLRK1|MIR128-1|SPI1|KLRK1|CREB3|APP|LGALS3|PLCB1|WNK1|SPNS2|BCR|P4HB|TGFB1|PLA2G7|CXCL10|LYN|MDK|AIF1|CALR|MAPK1|P2RX4|LRCH1|GREM1|MED23|C1QBP|AKIRIN1|MIR146A|THBS1|C3AR1|DDT|DOCK8|CCL21|GAS6|IL12A|MICOS10-NBL1|TNFRSF14|ADAM17|MMP28|C5|MOSPD2|C5AR1|CC…	150	GOBP_REGULATION_OF_MONONUCLEAR_CELL_MIGRATION	-1.8634	0.0002	GOBP_REGULATION_OF_MONONUCLEAR_CELL_MIGRATION	REGULATION OF MONONUCLEAR CELL MIGRATION
Myeloid/Lymphocyte Chemotaxis Programs	3.52288	-3.52288	-0.367	0.0048	SPN|VEGFB|VEGFC|VEGFD|EDN3|DUSP1|SELE|CAMK1D|ECM1|EDN2|DPP4|ANXA1|EMILIN1|ITGA2|ITGA4|CSF1|SLIT2|KITLG|F7|CCR1|DAPK2|MSTN|FUT4|KLRC4-KLRK1|FUT9|SPI1|KLRK1|SWAP70|TNFRSF18|CREB3|MYD88|LBP|TACR1|LGALS3|TIRAP|BCR|P4HB|TGFB1|BST1|LYN|MDK|GDF15|ST3GAL4|CALR|MAPK1|LRCH1|GREM1|MED23|AKIRIN1|MIR146A|THBS1|DDT|DOCK8|CCL21|GPSM3|CCL24|MICOS10-NBL1|TNFRSF14|ADAM17|MMP28|MOSPD2|CCR7|WNT5A|MTUS1|CD47|NBL1|TRP…	233	GOBP_REGULATION_OF_LEUKOCYTE_MIGRATION	-1.6915	0.0003	GOBP_REGULATION_OF_LEUKOCYTE_MIGRATION	REGULATION OF LEUKOCYTE MIGRATION
Myeloid/Lymphocyte Chemotaxis Programs	4	-4	-0.4013	0.002	VEGFB|TNFRSF11A|VEGFC|TNFSF11|VEGFD|EDN3|DUSP1|CAMK1D|EDN2|DPP4|ANXA1|EMILIN1|CSF1|IL1B|SLIT2|ITGB2|KITLG|CCR1|IRAK4|DAPK2|MMP2|ARHGEF5|MSTN|FUT4|SPI1|SWAP70|FLT1|CREB3|MYD88|LBP|LGALS3|TIRAP|CXCR2|BCR|TGFB2|BST1|LYN|MDK|JAML|MAPK1|GREM1|AKIRIN1|CKLF|MIR146A|THBS1|TREM1|DDT|CCL11|CCL21|CCL24|MICOS10-NBL1|CCL26|MMP28|MOSPD2|CCR7|MSMP|MTUS1|CD47|NBL1|TRPV4|NUP85|PDGFD|RIN3|SRP54|CSF3R|TAFA4|XCL1|PE…	237	GOBP_MYELOID_LEUKOCYTE_MIGRATION	-1.8322	0.0001	GOBP_MYELOID_LEUKOCYTE_MIGRATION	MYELOID LEUKOCYTE MIGRATION
Myeloid/Lymphocyte Chemotaxis Programs	2.92082	-2.92082	-0.4331	0.0162	STAP1|HMGB1|VEGFB|VEGFC|VEGFD|EDN3|DUSP1|IL23A|LGALS9|CAMK1D|IL34|EDN2|DPP4|TNFAIP6|SLAMF1|CSF1|SLAMF8|JAM3|SLIT2|F7|CCR1|MIF|DAPK2|MSTN|KLRC4-KLRK1|SPI1|KLRK1|MIR223|SWAP70|CREB3|APP|LBP|WNK1|PGF|TIRAP|PLA2G7|CXCL10|BST1|LYN|MDK|AIF1|CALR|MAPK1|GREM1|C1QBP|MPP1|AKIRIN1|THBS1|C3AR1|DDT|CCL21|GPSM3|GAS6|IL12A|MICOS10-NBL1|ADAM17|MMP28|C5|MOSPD2|C5AR1|CCR7|WNT5A|C5AR2|MTUS1|GPR18|NBL1|TRPV4|OXSR1|P…	126	GOBP_REGULATION_OF_LEUKOCYTE_CHEMOTAXIS	-1.7954	0.0012	GOBP_REGULATION_OF_LEUKOCYTE_CHEMOTAXIS	REGULATION OF LEUKOCYTE CHEMOTAXIS
Myeloid/Lymphocyte Chemotaxis Programs	2.50864	-2.50864	-0.5322	0.032	NEDD9|STK39|XCL1|SPN|APP|CCR2|MADCAM1|WNK1|LGALS9|S100A7|CCL5|P4HB|CORO1A|CXCL10|PTK2B|AIF1|PYCARD|ITGB3|ITGA4|CCL20|MED23|CD99L2|CXCL12|CXCL13|CCL3|SELENOK|TMEM102|CCL4|RHOA|DOCK8|CCL7|CCL21|TNFSF14|TNFRSF14|ADAM17|ADAM8|WNT5A|ABL1|ABL2|ADAM10|OXSR1|FADD|JAM2|ASCL2	44	GOBP_POSITIVE_REGULATION_OF_LYMPHOCYTE_MIGRATION	-1.8068	0.0031	GOBP_POSITIVE_REGULATION_OF_LYMPHOCYTE_MIGRATION	POSITIVE REGULATION OF LYMPHOCYTE MIGRATION
Myeloid/Lymphocyte Chemotaxis Programs	4	-4	-0.347	0.0007	SPN|TNFRSF11A|TNFSF11|EDN3|S1PR1|DUSP1|SELE|ECM1|EDN2|DPP4|EMILIN1|ITGA2|ITGA3|ITGA4|CSF1|ITGB7|SLIT2|KITLG|F7|SRC|DAPK2|MMP2|MSTN|FUT4|FUT9|SPI1|SWAP70|FLT1|TNFRSF18|MYD88|TACR1|TIRAP|RET|P4HB|TGFB1|TGFB2|H2BC1|MDK|GDF15|ST3GAL4|SELPLG|LRCH1|GPR15|GREM1|MED23|AKIRIN1|CKLF|THBS1|DDT|GPSM3|MICOS10-NBL1|TNFRSF14|ADAM17|MMP28|MOSPD2|TRPM2|MSMP|WNT5A|MTUS1|NBL1|PLG|TRPV4|AIRE|NUP85|OXSR1|PADI2|PDGFD|…	396	GOBP_LEUKOCYTE_MIGRATION	-1.7107	0	GOBP_LEUKOCYTE_MIGRATION	LEUKOCYTE MIGRATION
Myeloid/Lymphocyte Chemotaxis Programs	2.29243	-2.29243	-0.5932	0.0453	HMGB1|CREB3|APP|DEFB124|NINJ1|DUSP1|CCR2|LGMN|S100A7|CCL5|PLA2G7|CXCL10|LYN|SERPINE1|AIF1|CCL1|S100A14|SLAMF8|SLIT2|GREM1|CCR1|CX3CR1|CXCL12|FPR2|MICOS10-NBL1|MOSPD2|CXCL17|ANO6|NBL1|TNFSF18|DEFB131A|CCN3	32	GOBP_REGULATION_OF_MONOCYTE_CHEMOTAXIS	-1.8051	0.0051	GOBP_REGULATION_OF_MONOCYTE_CHEMOTAXIS	REGULATION OF MONOCYTE CHEMOTAXIS
Myeloid/Lymphocyte Chemotaxis Programs	4	-4	-0.4352	0.0001	VEGFB|TNFRSF11A|VEGFC|TNFSF11|VEGFD|EDN3|S1PR1|DUSP1|CAMK1D|EDN2|DPP4|ANXA1|CSF1|IL1B|SLIT2|CCR5|ITGB2|F7|CCR1|CH25H|SBDS|DAPK2|MMP2|ARHGEF5|MSTN|KLRC4-KLRK1|SPI1|KLRK1|SWAP70|CYP7B1|FLT1|CREB3|LBP|LGALS3|TIRAP|CXCR2|TGFB2|BST1|LYN|MDK|CALR|JAML|MAPK1|GREM1|AKIRIN1|CKLF|THBS1|TREM1|DDT|CCL11|CCL21|GPSM3|CCL24|MICOS10-NBL1|ADAM17|CCL26|MMP28|MOSPD2|TRPM2|CCR7|MSMP|WNT5A|MTUS1|NBL1|TRPV4|NUP85|OXSR…	236	GOBP_LEUKOCYTE_CHEMOTAXIS	-1.9571	0	GOBP_LEUKOCYTE_CHEMOTAXIS	LEUKOCYTE CHEMOTAXIS
Myeloid/Lymphocyte Chemotaxis Programs	2.69897	-2.69897	-0.3544	0.0235	CDH13|VEGFB|VEGFC|VEGFD|EDN3|S1PR1|DSCAM|DUSP1|SEMA5A|CAMK1D|EFNB2|USP14|WNT3|WNT3A|EDN2|DPP4|ITGA2|CSF1|SLIT2|SMAD3|F7|CCR1|MEGF8|MIR16-1|POU4F2|DAPK2|FGF16|FGF18|MSTN|KLRC4-KLRK1|SPI1|KLRK1|ROBO3|SWAP70|CREB3|LBP|ARTN|ATOH7|TIRAP|FGFR1|TGFB1|FEZF2|SEMA3F|BST1|LYN|MDK|CALR|MAPK1|GREM1|TMSB4X|AKIRIN1|THBS1|DDT|CCL21|GPSM3|MICOS10-NBL1|TPBG|ADAM17|CCL26|MMP28|KIF21A|MOSPD2|CCR7|MIR34A|WNT5A|MTUS1|…	215	GOBP_REGULATION_OF_CHEMOTAXIS	-1.5938	0.002	GOBP_REGULATION_OF_CHEMOTAXIS	REGULATION OF CHEMOTAXIS
Natural killer cell activation	2.33724	-2.33724	-0.4314	0.0426	HAVCR2|IL12B|PGLYRP1|PGLYRP2|IL18|PGLYRP3|IL2|IL23A|IL23R|TICAM1|VAMP2|SLAMF1|STAT5A|STAT5B|JAK2|KLRF2|CD2|AXL|ID2|FLT3LG|MIR130A|RASGRP1|KLRC1|KLRC2|CD48|KLRC3|TYRO3|CLEC12A|KLRC4-KLRK1|RABL3|KLRD1|KLRK1|DCAF15|VAV1|BAG6|BLOC1S6|NCR1|IL15RA|LAMP1|ZNF683|IL21R|PBX1|KAT7|KIR3DS1|MERTK|BLOC1S3|NFIL3|GAS6|IL12A|LEP|ELF4|PIBF1|IL18R1|TYK2|ULBP1|IL21|ULBP2|ULBP3|TYROBP|UNC13D|NCR3|AP1G1|ZBTB1|EMP2|CD1…	108	GOBP_NATURAL_KILLER_CELL_ACTIVATION	-1.6539	0.0046	GOBP_NATURAL_KILLER_CELL_ACTIVATION	NATURAL KILLER CELL ACTIVATION
Natural killer cell activation	2.50864	-2.50864	-0.6431	0.032	ZBTB1|IL12B|IL18|IL23A|IL23R|RPL13A|TICAM1|FCGR3A|BLOC1S6|TOX|HLA-E|STAT5A|STAT5B|IL15RA|JAK2|AXL|BLOC1S3|FLT3LG|GAS6|IL12A|MIR130A|TYK2|RASGRP1|IL21|TYROBP|IL15	26	GOBP_POSITIVE_REGULATION_OF_NATURAL_KILLER_CELL_ACTIVATION	-1.8932	0.0031	GOBP_POSITIVE_REGULATION_OF_NATURAL_KILLER_CELL_ACTIVATION	POSITIVE REGULATION OF NATURAL KILLER CELL ACTIVATION
Negative Regulation of Immune & Defense Responses	4	-4	-0.5152	0.0002	HAVCR2|SPN|HLA-A|SUSD4|IFNL1|PGLYRP1|TNFSF4|PGLYRP2|PGLYRP3|GRB2|IL2|LGALS9|RPS19|LILRB4|SLAMF1|STAT5A|ANXA1|APOA1|KIR2DL4|SLAMF8|INPP5D|NECTIN2|AXL|IRAK3|APOA2|RC3H1|ZC3H12A|TMBIM6|ZPBP2|KLRC1|A2M|KLRD1|SPI1|MIR302A|APPL1|ARRB2|FOXF1|VSIG4|LGALS3|ENPP3|BCL6|BCR|TGFB1|TGFB2|TGFB3|BST2|NECTIN4|MASP1|GRN|ANGPT1|SPINK5|IL10|C4BPA|C4BPB|IL13RA2|TWIST1|AHR|UFL1|NCKAP1L|ASCL2|IL33|USP5|XCL1|IL4I1|IL4R|…	135	GOBP_NEGATIVE_REGULATION_OF_IMMUNE_EFFECTOR_PROCESS	-2.1208	0	GOBP_NEGATIVE_REGULATION_OF_IMMUNE_EFFECTOR_PROCESS	NEGATIVE REGULATION OF IMMUNE EFFECTOR PROCESS
Negative Regulation of Immune & Defense Responses	4	-4	-0.8187	0.0001	HAVCR2|KLRD1|HLA-A|PVR|HLA-B|GRB2|ARRB2|LGALS9|TIGIT|HLA-F|TGFB1|HLA-G|LILRB1|HLA-E|CD96|CRK|CEACAM1|NECTIN4|KIR2DL4|MICA|INPP5D|NECTIN2|CLEC12B|SERPINB4|SERPINB9|KLRC1	26	GOBP_NEGATIVE_REGULATION_OF_NATURAL_KILLER_CELL_MEDIATED_IMMUNITY	-2.3309	0	GOBP_NEGATIVE_REGULATION_OF_NATURAL_KILLER_CELL_MEDIATED_IMMUNITY	NEGATIVE REGULATION OF NATURAL KILLER CELL MEDIATED IMMUNITY
Negative Regulation of Immune & Defense Responses	4	-4	-0.4453	0.0009	LACRT|HAVCR2|SIGIRR|HLA-A|SUSD4|TARBP2|GRB2|TTLL12|IFI16|LGALS9|RPS19|CARD16|USP38|NT5C2|ILRUN|ADAR|ISG15|YWHAZ|DNAJA3|KIR2DL4|TNFAIP3|SLAMF8|INPP5D|NECTIN2|IRAK3|TRIM21|IRGM|TREX1|ITCH|MIR26B|LYAR|USP18|PPARG|KLRC1|MAPKBP1|A2M|METTL3|TYRO3|KLRD1|ACOD1|USP15|ARRB2|VSIG4|AURKB|MMP12|BANF1|LILRA2|MIR21|TGFB1|PIM1|LTF|ZDHHC18|NLRC5|NLRP4|NECTIN4|C1QBP|GRN|TRIM38|MICB|PARP14|SPINK5|ATG5|AHR|MIR4691|Y…	135	GOBP_NEGATIVE_REGULATION_OF_RESPONSE_TO_BIOTIC_STIMULUS	-1.9333	0	GOBP_NEGATIVE_REGULATION_OF_RESPONSE_TO_BIOTIC_STIMULUS	GOBP_NEGATIVE_REGULATION_OF_CELL_KILLING
Negative Regulation of Immune & Defense Responses	4	-4	-0.3863	0.002	HAVCR2|SPN|HLA-A|HLA-DRB1|TNFSF4|TTLL12|IFI16|ALOX15|USP38|ANXA1|YWHAZ|PSMA1|INPP5D|PSMB4|IRAK3|RC3H1|ZC3H12A|SRC|MIR19B1|PPARG|KLRC1|CLEC12A|KLRD1|SPI1|MAPK14|LGALS3|BCL6|BCR|TGFB1|LYN|C9ORF72|NECTIN4|MASP1|GRN|TRIM27|MIR19A|TNFRSF14|AHR|MIR4691|YTHDF3|UFL1|ARG2|ASCL2|USP5|WDR41|XCL1|ZBTB7B|NLRC3|CCR2|GIGYF2|NLRP6|NLRX1|NMI|YTHDF2|CD69|AMBP|CD80|NR1H3|CD96|CRK|OAS1|OAS3|CEP63|CLEC4G|PARP1|CLEC12…	215	GOBP_NEGATIVE_REGULATION_OF_IMMUNE_RESPONSE	-1.7758	0.0001	GOBP_NEGATIVE_REGULATION_OF_IMMUNE_RESPONSE	GOBP_ANTIGEN_PROCESSING_AND_PRESENTATION_VIA_MHC_CLASS_IB
Negative Regulation of Immune & Defense Responses	4	-4	-0.7893	0.0002	HAVCR2|IL4|KLRD1|PTPRC|HLA-A|IL7R|PVR|HLA-B|GRB2|ARRB2|LGALS9|TIGIT|HLA-F|TGFB1|HLA-G|LILRB1|HLA-E|FCGR2B|CRK|CEACAM1|NECTIN4|KIR2DL4|MICA|INPP5D|NECTIN2|CLEC12B|CX3CR1|SERPINB4|SERPINB9|CR1|KLRC1|NCKAP1L|PPP3CB|IL13	34	GOBP_NEGATIVE_REGULATION_OF_CELL_KILLING	-2.2751	0	GOBP_NEGATIVE_REGULATION_OF_CELL_KILLING	POSITIVE REGULATION OF T CELL MEDIATED CYTOTOXICITY
Negative Regulation of Immune & Defense Responses	4	-4	-0.3276	0.0001	SPN|TNFRSF11B|TNFSF4|DUSP1|YPEL4|SDC4|SFRP1|DPP4|EMILIN1|TMEM131L|SLC4A2|SLIT2|PSMA1|KITLG|PSMB4|ERBB2|ID2|RC3H1|ZC3H12A|MIR130A|TMBIM6|SRC|MIR19B1|MIR221|MIR222|PPARG|SPI1|TNFAIP8L2|MAPK14|PTPN11|QKI|FOXF1|TGFB1|TGFB2|TGFB3|MDK|GDF15|NECTIN4|GLMN|LRCH1|TSC22D1|GPNMB|GREM1|GRN|SNAI2|SOX9|THBS1|DDT|TRIM27|TRIM32|MICOS10-NBL1|TNFRSF14|MMP28|TWIST1|CARTPT|AHR|YTHDF3|ADORA2A|NBL1|PADI2|ARG2|HMOX1|RIN…	577	GOBP_NEGATIVE_REGULATION_OF_IMMUNE_SYSTEM_PROCESS	-1.6852	0	GOBP_NEGATIVE_REGULATION_OF_IMMUNE_SYSTEM_PROCESS	GOBP_PEPTIDE_ANTIGEN_ASSEMBLY_WITH_MHC_PROTEIN_COMPLEX
Negative Regulation of Immune & Defense Responses	4	-4	-0.4813	0.0015	HAVCR2|HLA-A|SUSD4|GRB2|TTLL12|IFI16|LGALS9|RPS19|USP38|ADAR|ISG15|YWHAZ|DNAJA3|KIR2DL4|TNFAIP3|SLAMF8|INPP5D|NECTIN2|IRAK3|TRIM21|TREX1|LYAR|USP18|PPARG|KLRC1|A2M|METTL3|TYRO3|KLRD1|ACOD1|USP15|ARRB2|VSIG4|AURKB|MMP12|BANF1|MIR21|TGFB1|PIM1|ZDHHC18|NLRC5|NLRP4|NECTIN4|GRN|PARP14|ATG5|MIR4691|YTHDF3|CACTIN|NLRC3|GIGYF2|NLRX1|NMI|YTHDF2|LILRB1|MUL1|NR1H3|CD96|CRK|OAS1|CEACAM1|OAS3|OTOP1|CEP63|MICA…	98	GOBP_NEGATIVE_REGULATION_OF_INNATE_IMMUNE_RESPONSE	-1.9956	0.0001	GOBP_NEGATIVE_REGULATION_OF_INNATE_IMMUNE_RESPONSE	GOBP_T_CELL_CHEMOTAXIS
Negative Regulation of Immune & Defense Responses	2.69897	-2.69897	-0.3247	0.0233	HAVCR2|SPN|STAT3|HLA-A|HLA-DRB1|TTLL12|CDH5|IFI16|USP38|VPS35|FEM1A|FNDC4|YWHAZ|APOA1|PBK|ISL1|MIR3909|PSMA1|SMAD3|INPP5D|PSMB4|IRAK3|MACIR|IRGM|ITCH|MIR15B|MIR16-1|SRC|MIR19B1|MIR221|PPARD|MIR222|PPARG|KLRC1|SYT11|CLEC12A|KLRD1|TNFAIP8L2|KRT1|MAPK14|FOXF1|APOE|C1QTNF3|FAM76B|BCR|TGFB1|LYN|MDK|MIR141|NECTIN4|RORA|LDLR|LRFN5|TMSB4X|UACA|GRN|MEFV|MIR181A2|TRIM38|LPCAT3|MFHAS1|MICB|MIR146A|MIR19A|AH…	306	GOBP_NEGATIVE_REGULATION_OF_DEFENSE_RESPONSE	-1.5287	0.002	GOBP_NEGATIVE_REGULATION_OF_DEFENSE_RESPONSE	GOBP_COMPLEMENT_ACTIVATION
Negative Regulation of Immune & Defense Responses	2.74473	-2.74473	-0.3002	0.0208	SIGIRR|SPN|STAT3|DUSP1|EPPK1|CDH5|SEMA5A|SERPINF2|EPHA4|DPP4|FEM1A|FNDC4|ISL1|MIR3909|SLIT2|PSMA1|SMAD3|PSMB4|MACIR|MIR15B|MIR16-1|SRC|MIR19B1|FAP|MIR221|PPARD|MIR222|PPARG|TNFAIP8L2|MAPK14|FOXF1|APOE|C1QTNF3|TGFB1|SEMA3F|MDK|MIR141|NECTIN4|RORA|GREM1|TMSB4X|UACA|GRID2|APOH|GRN|MIR181A2|TRIM38|LPCAT3|THBS1|DDT|MICOS10-NBL1|MMP28|WNT5A|AHR|YTHDF3|ADORA2A|NBL1|PLG|PADI2|ARG2|RIN3|CNTNAP2|GIGYF2|WNT…	442	GOBP_NEGATIVE_REGULATION_OF_RESPONSE_TO_EXTERNAL_STIMULUS	-1.5071	0.0018	GOBP_NEGATIVE_REGULATION_OF_RESPONSE_TO_EXTERNAL_STIMULUS	GOBP_POSITIVE_REGULATION_OF_NATURAL_KILLER_CELL_ACTIVATION
Nuclear and organelle localization	4	4	0.644	0.0019	SYNE3|CLMN|NUDC|TRIM58|LMNA|CEP120|NTN1|PCM1|SLIT1|FBXW11|DOCK7|DYNC1H1|LMNB1|LMNB2|SUN2|MYH10|SYNE2|SUN1|PAFAH1B1|TACC1|TACC2|FHOD1|TACC3|TMEM201|HOOK3|NHERF1|CDC42|DCTN1	28	GOBP_NUCLEAR_MIGRATION	2.1269	0.0001	GOBP_NUCLEAR_MIGRATION	NUCLEAR MIGRATION
Nuclear and organelle localization	4	4	0.6183	0.0027	SYNE3|CLMN|NUDC|TRIM58|TLK2|LMNA|CEP120|NTN1|PCM1|CDK9|KIF25|SLIT1|FBXW11|DOCK7|DYNC1H1|LMNB1|LMNB2|SUN2|MYH10|SYNE2|SIRT1|SUN1|PAFAH1B1|TACC1|TACC2|FHOD1|TACC3|TMEM201|HOOK3|NHERF1|CDC42|DCTN1|CAV3	33	GOBP_NUCLEUS_LOCALIZATION	2.0968	0.0001	GOBP_NUCLEUS_LOCALIZATION	NUCLEUS LOCALIZATION
Nuclear and organelle localization	2.25964	2.25964	0.2615	0.0476	SYNE3|TRIP11|SNX6|CDH3|SDC4|SDCBP|SDC1|STK25|HIF1A|SHROOM2|LIN7A|LIN7B|LIN7C|ITGA4|RPS15|SPIRE1|SPIRE2|EXOC4|PDZD11|SNF8|UBB|RBM10|FOXF1|RAB11A|BTBD8|RCC2|DYNLT1|TESK1|EXOC2|EXOC7|GATA1|MAP2K1|TLE6|LAMP1|ARHGAP21|BICD1|BICD2|BICDL2|BORCS6|AGBL4|CDR2L|AP3B2|COPG1|AP3M1|COPG2|AP3M2|DYNC1I1|SIRT1|AP3S1|AP3S2|F8A1|UBE2B|F8A2|F8A3|AGTPBP1|BLOC1S2|KIF28P|BLOC1S3|KXD1|BLOC1S4|LRPPRC|ASIP|BORCS5|FEZ1|TME…	493	GOBP_ESTABLISHMENT_OF_ORGANELLE_LOCALIZATION	1.3487	0.0055	GOBP_ESTABLISHMENT_OF_ORGANELLE_LOCALIZATION	ESTABLISHMENT OF ORGANELLE LOCALIZATION
Nuclear Transport & RNA Trafficking	2.42022	2.42022	0.3409	0.0371	VRK1|WDR73|PRM1|UBXN2A|VPS4B|PRM2|UBXN2B|PSME4|MACROH2A1|PYGO1|RPS19|DES|PYGO2|AGFG1|AGFG2|ATXN7|NUMA1|DDX11|MFSD14A|PHF8|NECTIN2|PAFAH1B1|PIWIL1|DMRTC2|SMARCA5|TARDBP|WBP2NL|ETS1|HABP4|NOLC1|TBPL1|CHEK1|TMF1|CHMP3|DCTN1|SUV39H1|TOR1A|PARP11|CDKN2A|EMD|EMG1|PML|USP50|BEND3|NUP153|NEK6|BANF1|H3-3A|H3-3B|H2BC1|TNP2|RCC1|SYNE1|REEP3|NEMP1|REEP4|LMNB1|SERBP1|LMNB2|POLR1B|SIRT1|DMPK|TMEM201|NFE2L1|BIN…	159	GOBP_NUCLEUS_ORGANIZATION	1.5177	0.0038	GOBP_NUCLEUS_ORGANIZATION	NUCLEUS ORGANIZATION
Nuclear Transport & RNA Trafficking	4	4	0.4041	0.0002	EIF4ENIF1|NRDE2|NUP214|XPO1|AGFG1|EIF4A3|ADAR|RBM22|IL1B|SMG7|CPSF6|RPS15|CDKN1B|THOC1|THOC6|UPF1|UPF2|THOC5|ALKBH5|KHDRBS1|RANGAP1|NPAP1|PRP4K|PCID2|NEMF|RITA1|CDKN2A|EMD|XPO4|XPO5|XPO6|XPO7|MDM2|XPOT|PTPN11|NUP153|RBM10|EIF6|WNK1|ALYREF|C12ORF50|CASC3|DDX19B|IWS1|DDX39B|FAM76B|FYTTD1|TGFB1|MAGOHB|RAE1|NOL6|DDX19A|NXF2|RANBP2|NXF2B|NPM1|NXF3|SIRT7|MALT1|NXF5|POLDIP3|RBM33|CALR|NUP62|SARNP|THOC2|…	172	GOBP_NUCLEAR_EXPORT	1.8521	0	GOBP_NUCLEAR_EXPORT	NUCLEAR EXPORT
Nuclear Transport & RNA Trafficking	2.67778	2.67778	0.3361	0.024	EIF4ENIF1|STAT3|SYK|HSP90AA1|NUP214|HCLS1|FERMT1|IFNG|PPP3CA|SPRN|IPO7|ADAR|RBM22|HYAL2|AKT1|KPNA4|ATF2|JAK2|SMAD3|KPNA2|IPO5|KPNA6|UBR5|TMCO6|CDKN1A|TNPO1|TARDBP|TNPO2|TNPO3|TRIM28|ZC3H12A|NPAP1|NR4A1|ELAVL1|NUP50|MAPK14|PML|APPL1|YWHAB|APPL2|NUP153|KPNA7|MMP12|GCKR|TGFB1|HEATR3|RANBP2|HSPA12A|LRRK2|KPNA3|NPM1|NUP62|FLNA|PRKAG1|DMAP1|SMO|TXNIP|MAVS|XBP1|PPP3R1|UFM1|PRICKLE1|ANGPT1|SPG11|RPL23|BA…	178	GOBP_IMPORT_INTO_NUCLEUS	1.5451	0.0021	GOBP_IMPORT_INTO_NUCLEUS	IMPORT INTO NUCLEUS
Nuclear Transport & RNA Trafficking	4	4	0.4842	0.0003	AKAP8L|NRDE2|NUP214|XPO1|NUP93|AGFG1|EIF4A3|SETD2|ENY2|EIF4E|FMR1|SMG7|GLE1|CPSF6|THOC1|THOC6|SEM1|UPF1|UPF2|THOC5|DHX9|ALKBH5|DDX39A|HNRNPA1|KHDRBS1|NPAP1|PCID2|SMG1|MAGOH|NCBP2|NUP155|XPO5|XPOT|NUP153|RBM15B|WNK1|ALYREF|C12ORF50|NUP160|CASC3|NUP188|NUP98|RBM8A|DDX19B|IWS1|DDX39B|FYTTD1|MAGOHB|TPR|HNRNPA2B1|RAE1|NOL6|DDX19A|NXF1|NXF2|NXF2B|NXT1|NXF3|NXT2|NXF5|POLDIP3|NUP107|RBM33|NUP133|NUP62|SA…	94	GOBP_RNA_EXPORT_FROM_NUCLEUS	2.0205	0	GOBP_RNA_EXPORT_FROM_NUCLEUS	RNA EXPORT FROM NUCLEUS
Nuclear Transport & RNA Trafficking	4	4	0.3497	0.0001	STAT3|NRDE2|HSP90AA1|NUP214|NUP37|NUP43|FERMT1|IFNG|SPRN|HYAL2|KPNA4|ATF2|IL1B|SMAD3|IPO5|UBR5|TMCO6|CDKN1A|RPS15|TNPO1|CDKN1B|TARDBP|THOC1|TNPO2|THOC6|TNPO3|TRIM28|UPF1|UPF2|THOC5|ZC3H12A|ALKBH5|KHDRBS1|PRP4K|NEMF|RITA1|ELAVL1|MAPK14|XPO4|XPO5|XPO6|PML|XPO7|XPOT|PTPN11|YWHAB|RBM10|KPNA7|ALYREF|C12ORF50|CASC3|DDX19B|IWS1|DDX39B|FAM76B|FYTTD1|GCKR|TGFB1|HEATR3|PPP1CC|MAGOHB|RAE1|NOL6|RANBP1|DDX19A…	342	GOBP_NUCLEAR_TRANSPORT	1.7381	0	GOBP_NUCLEAR_TRANSPORT	NUCLEAR TRANSPORT
Nuclear Transport & RNA Trafficking	4	4	0.4096	0	FBL|NRDE2|NUP214|NUP37|NUP43|NOP58|YY1|ZNF385A|DHX36|TNKS|KHSRP|EXOSC10|PNPT1|PUM2|THOC1|THOC6|TOMM20|UPF1|UPF2|SLBP|THOC5|TOMM20L|ZFP36|ZFP36L1|ALKBH5|FUBP3|KHDRBS1|MEX3D|CCT2|CCT3|STAU2|CCT4|CCT5|CCT7|CCT8|XPO5|XPOT|QKI|TCP1|ARC|ATXN2|ALYREF|C12ORF50|CASC3|DDX19B|IWS1|DDX39B|FYTTD1|HNRNPA1L2|LUZP4|MAGOHB|MRPL18|RAE1|NOL6|DDX19A|NXF2|RANBP2|NXF2B|NXF3|NXF5|POLDIP3|RBM33|BICD1|RFTN2|BICD2|RTRAF|S…	204	GOBP_RNA_LOCALIZATION	1.9244	0	GOBP_RNA_LOCALIZATION	RNA LOCALIZATION
Nuclear Transport & RNA Trafficking	4	4	0.4397	0	CETN2|CETN3|NRDE2|CKAP5|NUP214|NUP37|NUP43|XPO1|AGFG1|EIF4A3|TNKS|KHSRP|PNPT1|SMG7|CPSF6|THOC1|THOC6|TOMM20|UPF1|UPF2|SLBP|THOC5|TOMM20L|ZFP36|ZFP36L1|ALKBH5|KHDRBS1|NPAP1|PCID2|NUP50|PARP11|XPO5|XPOT|QKI|NUP153|ARC|YBX1|ATXN2|WNK1|ALYREF|C12ORF50|CASC3|DDX19B|IWS1|MX2|TST|DDX39B|FYTTD1|HNRNPA1L2|LUZP4|MAGOHB|MRPL18|RAE1|NOL6|DDX19A|NXF2|RANBP2|NXF2B|NXF3|NXF5|POLDIP3|RBM33|RFTN2|BICD2|NUP62|RTRA…	165	GOBP_ESTABLISHMENT_OF_RNA_LOCALIZATION	1.9969	0	GOBP_ESTABLISHMENT_OF_RNA_LOCALIZATION	ESTABLISHMENT OF RNA LOCALIZATION
Nuclear Transport & RNA Trafficking	4	4	0.3557	0.0019	NRDE2|ABCD1|NUP214|NUP37|NUP43|CALHM2|SLC25A36|ABCC11|TNKS|KHSRP|PNPT1|THOC1|THOC6|TOMM20|UPF1|UPF2|SLBP|THOC5|TOMM20L|ZFP36|ZFP36L1|ALKBH5|KHDRBS1|SLC25A25|XPO5|XPOT|QKI|SLC17A9|SLC25A17|ARC|SLC25A23|ATXN2|SLC25A24|ALYREF|SLC25A31|C12ORF50|SLC25A41|CASC3|SLC25A42|DDX19B|IWS1|SLC25A6|DDX39B|SLC35B1|FYTTD1|HNRNPA1L2|LUZP4|MAGOHB|MRPL18|RAE1|NOL6|DDX19A|NXF2|RANBP2|NXF2B|NXF3|NXF5|SLC35B4|POLDIP3|R…	237	GOBP_NUCLEOBASE_CONTAINING_COMPOUND_TRANSPORT	1.6841	0.0001	GOBP_NUCLEOBASE_CONTAINING_COMPOUND_TRANSPORT	NUCLEOBASE CONTAINING COMPOUND TRANSPORT
Nuclear Transport & RNA Trafficking	4	4	0.4466	0.0001	CETN2|CETN3|NUP214|NUP37|NUP43|XPO1|AGFG1|EIF4A3|TNKS|KHSRP|SMG7|THOC1|THOC6|UPF1|UPF2|SLBP|THOC5|ZFP36|ZFP36L1|ALKBH5|PCID2|NUP50|PARP11|QKI|NUP153|ARC|WNK1|ALYREF|C12ORF50|CASC3|DDX19B|IWS1|MX2|DDX39B|FYTTD1|HNRNPA1L2|LUZP4|MAGOHB|RAE1|DDX19A|NXF2|RANBP2|NXF2B|NXF3|NXF5|POLDIP3|RBM33|BICD2|NUP62|SARNP|THOC2|SRSF3|NSUN2|SRSF7|THOC3|THOC7|PABPN1|UPF3A|ZC3H11A|ZC3H11B|NCBP1|ZC3H11C|NCBP3|LRPPRC|MC…	133	GOBP_MRNA_TRANSPORT	1.9764	0	GOBP_MRNA_TRANSPORT	MRNA TRANSPORT
Nuclear Transport & RNA Trafficking	2.61979	2.61979	0.2892	0.0257	BRAT1|STAT3|TFRC|TRIM8|HSP90AA1|NUP214|PYGO1|FERMT1|IFNG|SPRN|WWTR1|YAP1|EIF2AK3|HYAL2|YWHAZ|RPL11|KPNA4|ATF2|SIX4|SMAD3|IPO5|PINX1|UBR5|TMCO6|CDK5RAP3|CDKN1A|PLRG1|TNPO1|TARDBP|TNPO2|TNPO3|TRIM28|ZC3H12A|UTP25|SRC|TOR1A|CCT2|ELAVL1|CCT3|CCT4|CCT5|CCT7|CCT8|MAPK14|PML|LATS2|YWHAB|KPNA7|TCP1|TOPORS|BBS4|TESK1|FAM76B|GCKR|TGFB1|HEATR3|TGFB2|RANBP2|LRRK2|KPNA3|NR5A1|CALR|OSBPL8|DCLK1|KAT7|TAF8|LMNB1…	328	GOBP_PROTEIN_LOCALIZATION_TO_NUCLEUS	1.4332	0.0024	GOBP_PROTEIN_LOCALIZATION_TO_NUCLEUS	PROTEIN LOCALIZATION TO NUCLEUS
Nuclear Transport & RNA Trafficking	4	4	0.7531	0.0004	NCBP2|THOC2|AKAP8L|NSUN2|NRDE2|NUP153|ADORA1|CPSF6|WNK1|IWS1|DHX9|ALKBH5|DDX39A|TPR|RSC1A1|KHDRBS1|HHEX|SETD2|NEAT1	19	GOBP_REGULATION_OF_NUCLEOBASE_CONTAINING_COMPOUND_TRANSPORT	2.2058	0	GOBP_REGULATION_OF_NUCLEOBASE_CONTAINING_COMPOUND_TRANSPORT	REGULATION OF NUCLEOBASE CONTAINING COMPOUND TRANSPORT
Nuclear Transport & RNA Trafficking	3.1549	3.1549	0.701	0.0101	NUP133|RTN4|AHCTF1|SEH1L|TMEM170A|NUP153|NUP98|NUP205|FXR1|NUP35|NUP93|NUP54|TPR|NDC1|NUP107	15	GOBP_NUCLEAR_PORE_ORGANIZATION	1.9691	0.0007	GOBP_NUCLEAR_PORE_ORGANIZATION	NUCLEAR PORE ORGANIZATION
Oxidative Phosphorylation & Mitochondrial Respiration	4	-4	-0.5379	0	ACTN3|COL6A1|ABCD1|DLD|DLST|IDH1|IDH2|KGD4|OGDH|OGDHL|FXN|ISCU|NDUFAB1|SUCLA2|SUCLG1|SUCLG2|AK4|SLC25A23|MLXIPL|MIR210|TRPV4|DLAT|PDHA1|PDHA2|PDHB|NOP53|FH|TNF|MFN2|ACO1|ACO2|ADSL|ANTKMT|ARL2|ATP5F1A|ATP5F1B|ATP5F1C|ATP5F1D|ATP5F1E|ATP5F1EP2|ATP5IF1|ATP5ME|ATP5MF|ATP5MG|ATP5PB|ATP5PD|ATP5PF|ATP5PO|NDP|ATP7A|ATPSCKMT|BCL2L13|BID|BLOC1S1|C2ORF69|CAT|CBFA2T3|CCNB1|CDK1|CHCHD10|CHCHD2|COA6|COQ9|COX10…	198	GOBP_AEROBIC_RESPIRATION	-2.5582	0	GOBP_AEROBIC_RESPIRATION	GOBP_REGULATION_OF_NUCLEAR_TRANSCRIBED_MRNA_POLY_A_TAIL_SHORTENING
Oxidative Phosphorylation & Mitochondrial Respiration	4	-4	-0.6025	0	COX8C|SNCA|CYC1|ACTN3|CYCS|STOML2|DGUOK|DNAJC15|DNAJC30|ETFRF1|GHITM|ABCD1|DLD|MACROH2A1|MLDHR|MT-ATP6|MT-ATP8|MT-CO1|MT-CO2|MT-CO3|MT-CYB|MT-ND1|MT-ND2|FXN|MT-ND3|MT-ND4|MT-ND4L|MT-ND5|ISCU|MT-ND6|MTCH2|MTCO2P12|NDUFAB1|NDUFA1|NDUFA10|NDUFA11|NDUFA12|NDUFA13|NDUFA2|NDUFA3|NDUFA4|NDUFA5|NDUFA6|NDUFA7|NDUFA8|NDUFA9|NDUFAF1|NDUFB1|NDUFB10|NDUFB11|NDUFB2|NDUFB3|NDUFB4|NDUFB5|NDUFB6|NDUFB7|NDUFB8|NDU…	151	GOBP_OXIDATIVE_PHOSPHORYLATION	-2.7695	0	GOBP_OXIDATIVE_PHOSPHORYLATION	GOBP_INFLAMMATORY_CELL_APOPTOTIC_PROCESS
Oxidative Phosphorylation & Mitochondrial Respiration	4	-4	-0.383	0	ALDH1L1|ALDH1L2|STAT3|ADHFE1|COL6A1|ABCD1|DLD|DLST|IDH1|IDH2|KGD4|OGDH|ENOX2|OGDHL|NDOR1|PDIA5|WDR93|HIF1A|FDX2|ACSM1|FXN|IRS2|ISCU|NDUFAB1|SLC27A5|SORBS1|PNPT1|PUM2|THAP11|AGL|OXCT1|MIR15B|SRC|PPARD|EPM2AIP1|MYBBP1A|SLC25A25|SUCLA2|SUCLG1|G6PC1|SUCLG2|GYG1|GYG2|GYS1|GYS2|AK4|MIR1271|NHLRC1|SLC25A23|PGD|PGM2|PPP1R3A|PPP1R3B|PPP1R3C|PPP1R3D|PPP1R3E|PPP1R3F|PPP1R3G|PRPS2|INSR|TRAP1|MLXIPL|MTLN|UGP2…	481	GOBP_GENERATION_OF_PRECURSOR_METABOLITES_AND_ENERGY	-1.9972	0	GOBP_GENERATION_OF_PRECURSOR_METABOLITES_AND_ENERGY	GENERATION OF PRECURSOR METABOLITES AND ENERGY
Oxidative Phosphorylation & Mitochondrial Respiration	4	-4	-0.5686	0	COX8C|SNCA|CYC1|CYCS|DGUOK|DNAJC15|VPS54|ETFRF1|GHITM|DLD|ENOX2|MT-CO1|MT-CO2|NDOR1|MT-CO3|PDIA5|MT-CYB|WDR93|MT-ND1|FDX2|MT-ND2|MT-ND3|MT-ND4|MT-ND4L|MT-ND5|ISCU|MT-ND6|MTCH2|MTCO2P12|NDUFAB1|NDUFA1|ETFDH|NDUFA10|IMMP2L|NDUFA11|NDUFA12|NDUFA2|NDUFA3|PUM2|NDUFA4|NDUFA5|THAP11|NDUFA6|NDUFA7|NDUFA8|NDUFA9|NDUFAF1|NDUFB1|NDUFB10|NDUFB2|NDUFB3|NDUFB4|NDUFB5|NDUFB6|NDUFB7|MYBBP1A|NDUFB8|NDUFB9|NDUFC1|…	127	GOBP_ELECTRON_TRANSPORT_CHAIN	-2.5345	0	GOBP_ELECTRON_TRANSPORT_CHAIN	ELECTRON TRANSPORT CHAIN
Oxidative Phosphorylation & Mitochondrial Respiration	3.52288	-3.52288	-0.7174	0.0046	COX8C|MTCO2P12|CYCS|NDUFA4|COX4I1|COX4I2|COX5A|COX5B|COX6A1|COX6A2|COX6B1|MT-CO1|COX6C|MT-CO2|COX7A1|MT-CO3|COX7A2|COX7A2L|COX7A2P2|COX7B|COX7B2|COX7C|COX8A	23	GOBP_MITOCHONDRIAL_ELECTRON_TRANSPORT_CYTOCHROME_C_TO_OXYGEN	-2.0678	0.0003	GOBP_MITOCHONDRIAL_ELECTRON_TRANSPORT_CYTOCHROME_C_TO_OXYGEN	MITOCHONDRIAL ELECTRON TRANSPORT CYTOCHROME C TO OXYGEN
Oxidative Phosphorylation & Mitochondrial Respiration	4	-4	-0.4114	0	STBD1|ACTN3|ADHFE1|COL6A1|ABCD1|DLD|KL|DLST|WDR45|WDR45B|IDH1|WIPI1|IDH2|IFNG|KGD4|OGDH|OGDHL|COMT|ACADVL|ACSM1|FXN|IRS2|ISCU|NDUFAB1|SORBS1|PNPT1|PUM2|AGL|MIR15B|CYP1A2|EPM2AIP1|MYBBP1A|SLC25A25|SUCLA2|SUCLG1|G6PC1|SUCLG2|GYG1|GYG2|GYS1|GYS2|AK4|MIR1271|NHLRC1|SLC25A23|PGM2|PPP1R3A|PPP1R3B|PPP1R3C|PPP1R3D|PPP1CC|PPP1R3E|PPP1R3F|PPP1R3G|INSR|TRAP1|MLXIPL|MTLN|UGP2|ACADM|CAVIN3|PHKA1|MIR210|PHKG2|…	348	GOBP_ENERGY_DERIVATION_BY_OXIDATION_OF_ORGANIC_COMPOUNDS	-2.0908	0	GOBP_ENERGY_DERIVATION_BY_OXIDATION_OF_ORGANIC_COMPOUNDS	ENERGY DERIVATION BY OXIDATION OF ORGANIC COMPOUNDS
Oxidative Phosphorylation & Mitochondrial Respiration	4	-4	-0.4919	0	ACTN3|COL6A1|ABCD1|DLD|DLST|IDH1|IDH2|IFNG|KGD4|OGDH|OGDHL|FXN|ISCU|NDUFAB1|PNPT1|PUM2|CYP1A2|MYBBP1A|SLC25A25|SUCLA2|SUCLG1|SUCLG2|AK4|SLC25A23|TRAP1|MLXIPL|MTLN|MIR210|TRPV4|CISD1|ETFA|ETFB|DLAT|PDHA1|PDHA2|PDHB|NOP53|NOS2|NR4A3|OAS1|SCO2|FH|GBA1|TNF|MFN2|ACO1|ACO2|ADSL|ANTKMT|ARL2|ATP5F1A|ATP5F1B|ATP5F1C|ATP5F1D|ATP5F1E|ATP5F1EP2|ATP5IF1|ATP5ME|ATP5MF|ATP5MG|PPARGC1A|ATP5PB|ATP5PD|PRDM16|ATP5P…	240	GOBP_CELLULAR_RESPIRATION	-2.4142	0	GOBP_CELLULAR_RESPIRATION	CELLULAR RESPIRATION
Oxidative Phosphorylation & Mitochondrial Respiration	4	-4	-0.6467	0	COX8C|SNCA|CYC1|CYCS|DGUOK|DNAJC15|GHITM|DLD|MT-CO1|MT-CO2|MT-CO3|MT-CYB|MT-ND1|MT-ND2|MT-ND3|MT-ND4|MT-ND4L|MT-ND5|ISCU|MT-ND6|MTCH2|MTCO2P12|NDUFAB1|NDUFA1|NDUFA10|NDUFA11|NDUFA12|NDUFA2|NDUFA3|NDUFA4|NDUFA5|NDUFA6|NDUFA7|NDUFA8|NDUFA9|NDUFAF1|NDUFB1|NDUFB10|NDUFB2|NDUFB3|NDUFB4|NDUFB5|NDUFB6|NDUFB7|NDUFB8|NDUFB9|NDUFC1|NDUFC2|NDUFC2-KCTD14|NDUFS1|NDUFS2|NDUFS3|NDUFS4|NDUFS5|NDUFS6|NDUFS7|NDUFS…	101	GOBP_ATP_SYNTHESIS_COUPLED_ELECTRON_TRANSPORT	-2.8076	0	GOBP_ATP_SYNTHESIS_COUPLED_ELECTRON_TRANSPORT	ATP SYNTHESIS COUPLED ELECTRON TRANSPORT
Oxidative Stress & Detoxification	2.40894	-2.40894	-0.3752	0.0378	MIR495|CLIC2|CYGB|MIR326|RAB40B|MIR508|OSCP1|SLC22A18|SLC47A2|MIR9-1|GPX1|GSR|GSTA1|GSTK1|GSTM1|GSTM2|GSTM3|GSTO1|GSTO2|UGT1A10|GSTT1|SLC29A4|UGT1A7|AKR1A1|SLC22A3|LPO|MIR186|GSTZ1|FBLN5|MPO|DUOX1|APOA4|NNT|APOE|MUC2|TP53INP1|HBZ|PIM1|NQO1|MTARC1|MTARC2|ABCB6|SESN2|SLC39A8|MT1G|MIR129-1|MIR133B|SOD2|PDZK1|NOS3|SLC22A5|MT3|RALBP1|PRDX6|TXN|ATP7B|SLC17A3|PXDN|TXNDC2|SLC22A1|TXNRD2|SLC22A2|TXNRD3|AB…	170	GOBP_DETOXIFICATION	-1.6251	0.0039	GOBP_DETOXIFICATION	DETOXIFICATION
Oxidative Stress & Detoxification	2.95861	-2.95861	-0.3395	0.0146	CDH13|CYGB|COL6A1|DDC|COMT|AKR1A1|CLDN1|INMT|SLC22A3|GLYAT|SLC18A2|SRF|CYP1A1|FBLN5|CYP1B1|DUOX1|APOA4|APOE|EPHX2|RAD51|TP53INP1|BCL2|FECH|HBZ|LYN|UBA52|PON2|DHRS2|MTARC1|MTARC2|ABCB6|SESN2|MT1G|MIR129-1|DNMT3A|MIR133B|PDZK1|NOS3|SLC22A5|AHR|ADAMTS13|ATP7B|SLC22A1|SLC22A2|ALAD|CP|CNP|NEFL|MAP1B|PON1|SLC47A1|RDH11|SLC30A4|RDH12|ALDH1A1|MT1A|XPA|MT1B|MT1DP|MT1E|ATF4|ERCC6|MT1F|MT1H|MT1HL1|MT1M|MT1X…	274	GOBP_RESPONSE_TO_TOXIC_SUBSTANCE	-1.5974	0.0011	GOBP_RESPONSE_TO_TOXIC_SUBSTANCE	RESPONSE TO TOXIC SUBSTANCE
Oxidative Stress & Detoxification	2.4318	-2.4318	-0.4319	0.0361	CLIC2|CYGB|GPX1|GSR|GSTA1|GSTK1|GSTM2|GSTO1|GSTO2|GSTT1|LPO|GSTZ1|FBLN5|MPO|DUOX1|APOA4|NNT|APOE|TP53INP1|HBZ|NQO1|SESN2|SOD2|NOS3|MT3|PRDX6|TXN|PXDN|TXNDC2|TXNRD2|TXNRD3|CP|PRDX1|SESN1|AMBP|CD36|SELENOW|PRDX2|PRDX3|DHFR|PRDX5|DHFRP1|MGST2|MB|NFE2L2|ALB|GCH1|ALOX5AP|APOM|MGST1|CCS|GPX4|FABP1|GPX2|GPX3|GPX5|GPX6|GPX7|GPX8|HBM|HBQ1|IPCEF1|KDM3B|PRDX4|LTC4S|NXN|PRXL2A|PXDNL|SELENOF|SOD3|SRXN1|TPO|TX…	98	GOBP_CELLULAR_OXIDANT_DETOXIFICATION	-1.7135	0.0037	GOBP_CELLULAR_OXIDANT_DETOXIFICATION	CELLULAR OXIDANT DETOXIFICATION
P53 signal transduction	2.39794	-2.39794	-0.3098	0.0387	HEXIM1|USP2|SNW1|E2F2|IFI16|E2F7|COPS3|USP7|ANKRD1|CASP2|WWOX|TP53RK|RPL11|ZNF385A|TAF9|TAF9B|AURKA|CDIP1|ERCC2|TFAP4|CDK5RAP3|CDKN1A|RPS15|CDKN1B|BRCA2|CHEK1|TMEM109|CHEK2|POU4F2|RPL37|E2F1|RPL5|MYBBP1A|AARS1|GTSE1|HAPSTR1|UBB|CRADD|PML|HIPK4|RBM38|TOPORS|FOXO3|KAT6A|RPS20|TP53BP2|RFFL|BCL2|MAGEA2|MAGEA2B|SETD9|DDIT4|MLXIPL|MAP2K6|TRIM24|SESN2|GREM1|SIRT1|SNAI1|SNAI2|URI1|NDRG1|PRAP1|RPL23|RRS1|…	194	GOBP_SIGNAL_TRANSDUCTION_BY_P53_CLASS_MEDIATOR	-1.4628	0.004	GOBP_SIGNAL_TRANSDUCTION_BY_P53_CLASS_MEDIATOR	SIGNAL TRANSDUCTION BY P53 CLASS MEDIATOR
P53 signal transduction	2.35655	-2.35655	-0.5083	0.0414	EEF1E1|CDKN2A|DVL2|HEXIM1|PLA2R1|UBB|EIF5A|MYC|PML|PYHIN1|RPS7|ATR|HIC1|RPS20|PPP1R15A|ANKRD1|RPL26|SPRED2|RPL11|MSX1|PMAIP1|ZNF385A|CHD5|ATM|ING4|CDK5RAP3|RPS15|SMARCA4|RPL23|TP73|ZNHIT1|DDX5|MIR186|RPL37|SPRED1|TP53BP1	36	GOBP_POSITIVE_REGULATION_OF_SIGNAL_TRANSDUCTION_BY_P53_CLASS_MEDIATOR	-1.742	0.0044	GOBP_POSITIVE_REGULATION_OF_SIGNAL_TRANSDUCTION_BY_P53_CLASS_MEDIATOR	POSITIVE REGULATION OF SIGNAL TRANSDUCTION BY P53 CLASS MEDIATOR
Phospholypid biosynthetic process	2.61979	2.61979	0.5918	0.0257	FIG4|INPP5E|SYNJ1|PIK3C3|PIK3CA|PIK3R4|PIK3CD|ATM|SYNJ2|ATG14|PIK3C2B|PIK3C2G|PIKFYVE|PIK3C2A|PIK3CB|BECN1|PIK3R3|UVRAG|PIK3CG|PTPRQ|OCRL|INPP4A|INPP4B	23	GOBP_PHOSPHATIDYLINOSITOL_3_PHOSPHATE_BIOSYNTHETIC_PROCESS	1.8448	0.0024	GOBP_PHOSPHATIDYLINOSITOL_3_PHOSPHATE_BIOSYNTHETIC_PROCESS	PHOSPHATIDYLINOSITOL 3 PHOSPHATE BIOSYNTHETIC PROCESS
Phospholypid biosynthetic process	2.25964	2.25964	0.2998	0.0476	LCLAT1|CRLS1|IDH1|PGS1|PI4KB|TAMM41|ALOX15|ACSL3|HTR2B|MBOAT2|APOA1|SLC44A1|INPP5D|CDS1|CEPT1|CHKA|CHKB|CHPT1|PCYT1B|AGPAT1|APOA2|AGPAT2|FAR1|AGPAT3|FLVCR1|AGPAT4|FITM2|AGPAT5|CDIPT|CDS2|GPAT4|PLAAT3|PPARD|SLC44A2|TMEM38B|SPTLC2|FIG4|PGAP1|DGKA|DGKB|DGKD|DGKE|DGKG|DOLK|DGKH|DPM1|DGKI|DPM2|DGKK|DPM3|INPP4A|INPP4B|GNPAT|INPP5J|LCAT|XBP1|LPCAT3|MIR30C1|LPCAT2|SERINC4|CHAT|VAC14|SLC44A4|OCRL|ABCA8|CL…	247	GOBP_PHOSPHOLIPID_BIOSYNTHETIC_PROCESS	1.4265	0.0055	GOBP_PHOSPHOLIPID_BIOSYNTHETIC_PROCESS	PHOSPHOLIPID BIOSYNTHETIC PROCESS
Positive Regulation of Cell Cycle	3.52288	3.52288	0.3116	0.0057	CENPV|DDR2|ROCK2|USP2|BTC|BUB1|EDN3|NSMCE2|VPS4B|UBXN2B|E2F7|NUSAP1|E2F8|OPN1LW|OPN1MW|OPN1MW2|OR1A2|OVOL1|ANXA1|PAGR1|YTHDC2|MAPK15|CCND1|EPGN|IL1B|ARF6|EZH2|AURKA|PIWIL2|EREG|PLK4|PLRG1|BRCA2|LRP5|CHEK1|CHMP3|CHEK2|MIR221|MIR222|CCND3|CYP1A1|DAZL|CDC25B|TFDP1|FGFR2|SVIL|PTENP1-AS|PKN2|PTK6|RAB11FIP3|FOXA1|HCFC1|PTPN11|RAB11FIP4|FBXO5|RAB11A|RAD18|CUL4A|RAD23A|RCC2|NCAPG2|NPM2|RAD51AP1|RAD51C|EX…	346	GOBP_POSITIVE_REGULATION_OF_CELL_CYCLE	1.5361	0.0003	GOBP_POSITIVE_REGULATION_OF_CELL_CYCLE	POSITIVE REGULATION OF CELL CYCLE
Positive Regulation of Cell Cycle	4	4	0.3763	0.0001	CENPV|DDR2|ROCK2|BTC|BUB1|EDN3|NSMCE2|VPS4B|UBXN2B|E2F7|NUSAP1|E2F8|OPN1LW|OPN1MW|OPN1MW2|OR1A2|ANXA1|PAGR1|MAPK15|CCND1|EPGN|IL1B|ARF6|EZH2|AURKA|PIWIL2|EREG|PLK4|PLRG1|LRP5|CHMP3|CHEK2|MIR221|MIR222|CCND3|CYP1A1|DAZL|CDC25B|TFDP1|SVIL|PTENP1-AS|PKN2|RAB11FIP3|RAB11FIP4|FBXO5|RAB11A|RAD18|CUL4A|RCC2|NCAPG2|NPM2|RAD51AP1|RAD51C|EXOC7|FGFR1|TGFB1|DDRGK1|RAD51B|RANBP1|INSR|RRM2|PBX1|TMOD3|KMT2E|RHN…	275	GOBP_POSITIVE_REGULATION_OF_CELL_CYCLE_PROCESS	1.806	0	GOBP_POSITIVE_REGULATION_OF_CELL_CYCLE_PROCESS	POSITIVE REGULATION OF CELL CYCLE PROCESS
Positive Regulation of Cell Cycle	4	4	0.5645	0.0029	MIR495|CDK10|DDR2|MIR515-1|CPSF3|KCNA5|ADAMTS1|MIR519D|RRM1|CENPJ|EGFR|ANXA1|AKT1|CCND1|CUL4B|EIF4G1|PLRG1|LSM10|LSM11|CCNE1|CCNE2|MIR221|MIR222|MIR29A|CCND3|CYP1A1|TFDP1|MBLAC1|STIL|DDX3X|PTENP1-AS|ANKRD17|MDM2|CDC6|CUL4A|PLCB1|MEPCE|MIR372|MIR214|MIR520A|MIR520H|AIF1|RRM2|MIR208A|TERT|RPTOR|KMT2E|MTBP|RDX|FGF10|RGCC|STOX1|ADAM17|CCND2|UBE2E2|SASS6	56	GOBP_POSITIVE_REGULATION_OF_G1_S_TRANSITION_OF_MITOTIC_CELL_CYCLE	2.0599	0.0001	GOBP_POSITIVE_REGULATION_OF_G1_S_TRANSITION_OF_MITOTIC_CELL_CYCLE	POSITIVE REGULATION OF G1 S TRANSITION OF MITOTIC CELL CYCLE
Positive Regulation of Cell Cycle	2.74473	2.74473	0.4694	0.0215	MIR495|CDK10|DDR2|MIR515-1|CPSF3|KCNA5|ADAMTS1|MIR519D|RRM1|CENPJ|EGFR|GLI1|ANXA1|PAGR1|AKT1|CCND1|CUL4B|EZH2|EIF4G1|PLCG2|PLRG1|LSM10|LSM11|CCNE1|CCNE2|MIR221|MIR222|MIR29A|CCND3|CYP1A1|PKP3|TFDP1|CRNN|MBLAC1|STIL|DDX3X|PTENP1-AS|ANKRD17|PAF1|MDM2|CDC6|CDC73|FAM83D|CUL4A|PLCB1|TBX2|MEPCE|MIR372|MIR214|MIR520A|MIR520H|DDRGK1|AIF1|RRM2|MIR208A|TERT|RPTOR|KMT2E|MTBP|RDX|FGF10|RGCC|STOX1|ADAM17|NANO…	70	GOBP_POSITIVE_REGULATION_OF_CELL_CYCLE_G1_S_PHASE_TRANSITION	1.8176	0.0018	GOBP_POSITIVE_REGULATION_OF_CELL_CYCLE_G1_S_PHASE_TRANSITION	POSITIVE REGULATION OF CELL CYCLE G1 S PHASE TRANSITION
Protein localization to chromosome	4	4	0.4749	0.0001	VRK1|WAPL|BUB1B|H1-5|MACROH2A1|USP7|CYREN|H2AC4|H2AC8|KNL1|EZH2|PINX1|TNKS|TNKS2|BRCA2|GNL3|H4C1|H4C11|H4C12|H4C13|H4C14|H4C15|H4C16|TERF2|H4C2|H4C3|H4C4|MACROH2A2|SPI1|H4C5|H4C6|ESCO2|H4C8|SPIDR|H4C9|PML|TASOR|HTATSF1|RAD17|TCP1|AURKB|RCC2|XRCC5|MCM8|MCM9|MMS22L|RHNO1|LRWD1|H2AX|HASPIN|RNF4|ZMYND8|VCP|RPA1|RPA2|BOD1|CHAMP1|APLF|PIAS4|CCT6A|IFFO1|PLK1|IK|BRD2|POT1|SGF29|PPHLN1|BUB3|ATR|SLF1|KNTC1…	128	GOBP_PROTEIN_LOCALIZATION_TO_CHROMOSOME	2.0528	0	GOBP_PROTEIN_LOCALIZATION_TO_CHROMOSOME	PROTEIN LOCALIZATION TO CHROMOSOME
Protein localization to chromosome	2.61979	2.61979	0.5794	0.026	H4C3|H4C4|H4C5|H4C6|IK|H4C8|H4C9|BUB1B|BUB3|AURKB|KNTC1|RCC2|H2BC11|MIS18A|TRAPPC12|ZW10|SPDL1|ZWILCH|H2AC4|H2AC8|TTK|CENPA|RB1|KNL1|MTBP|CDK1|HASPIN|CENPQ|CTCF|BOD1|H4C1|H4C11|SMC5|H4C12|CHAMP1|H4C13|H4C14|JARID2|H4C15|H4C16|H4C2	41	GOBP_PROTEIN_LOCALIZATION_TO_CHROMOSOME_CENTROMERIC_REGION	1.8692	0.0024	GOBP_PROTEIN_LOCALIZATION_TO_CHROMOSOME_CENTROMERIC_REGION	PROTEIN LOCALIZATION TO CHROMOSOME CENTROMERIC REGION
Reactive oxygen species metabolism	4	-4	-0.3789	0.0014	AKR1C3|CYGB|STAT3|COL6A1|ABCD1|PRG3|STK17A|ACE2|SHC1|MAOB|AGT|AGTR1|INAVA|ITGB2|AKR1C1|CDKN1A|ZC3H12A|ITGAM|SLC18A2|CYP1A1|CYP1A2|FBLN5|CYP1B1|SH3PXD2B|ELAVL1|NOXO1|DUOX1|MAPK14|DUOXA2|DHRS4|FAM210B|APOA4|LETMD1|FOXO3|BCL2|LIPA|BCR|HBZ|TGFB1|DDIT4|GADD45A|BST1|LRRK2|TRAP1|NCF4|TSPO|ABCB7|SESN2|MIR181A2|MIR27B|THBS1|NOS3|CCN2|NCF1|HK2|ARG2|CLCN3|TYROBP|NAGLU|TAFA4|CFLAR|VDAC1|PDK3|TUSC2|PDK4|CD177…	244	GOBP_REACTIVE_OXYGEN_SPECIES_METABOLIC_PROCESS	-1.7681	0.0001	GOBP_REACTIVE_OXYGEN_SPECIES_METABOLIC_PROCESS	REACTIVE OXYGEN SPECIES METABOLIC PROCESS
Reactive oxygen species metabolism	3.04576	-3.04576	-0.3962	0.0124	AKR1C3|COQ7|SNCA|STAT3|SYK|ABCD1|CBR1|GRB2|GRIN1|ROMO1|HDAC6|STK17A|ACE2|RIPK3|PON3|TLR4|SHC1|TLR6|FAS|AGT|AGTR1|ITGB2|AKR1C1|GNAI2|CDKN1A|ZC3H12A|ITGAM|MIR590|ADGRB1|MIR675|SLC18A2|MIR24-1|NOX5|PID1|FBLN5|CYP1B1|ELAVL1|NDUFC2|NOXO1|ACOD1|CRYAB|MAPK14|DUOXA2|HVCN1|MAPT|APP|DHRS4|EIF6|FOXO3|NNT|MMP3|RIPK1|PINK1|MIR21|BCR|BIRC2|TGFB1|GADD45A|SIRT3|BST1|FOXM1|LRRK2|TRAP1|SLC25A33|TSPO|ABCB7|ARF4|PAG…	149	GOBP_REGULATION_OF_REACTIVE_OXYGEN_SPECIES_METABOLIC_PROCESS	-1.7394	0.0009	GOBP_REGULATION_OF_REACTIVE_OXYGEN_SPECIES_METABOLIC_PROCESS	REGULATION OF REACTIVE OXYGEN SPECIES METABOLIC PROCESS
Regulation of Apoptosis and Programmed Cell Death	4	-4	-0.3092	0.0021	TNFSF11|VNN1|SRPX|SFRP1|ACSL5|HIF1A|WWOX|EIF2AK3|FXN|HYAL2|STYXL1|SYVN1|TAF6|TAF9|TAF9B|CSNK2A2|BCL2L1|TMBIM1|TMBIM6|EYA1|TMC8|EYA2|MIR16-1|SRC|FAIM2|MIR221|TMEM161A|DAPK2|FASLG|MIR222|PPARG|MCL1|MMP2|MMP9|UBB|PML|SLC25A31|RET|YBX3|RFFL|SLC25A6|TPD52L1|TPT1|P4HB|PRODH|TGFB2|TRAF1|TGFBR1|TRAF7|GATA1|MAP2K1|TRAP1|TRIM39|TXNDC12|SIRT1|SNAI1|XBP1|SNAI2|HDAC1|URI1|THBS1|TRIM32|WNT5A|ADORA2A|HMOX1|ATAD…	405	GOBP_REGULATION_OF_APOPTOTIC_SIGNALING_PATHWAY	-1.5853	0.0001	GOBP_REGULATION_OF_APOPTOTIC_SIGNALING_PATHWAY	REGULATION OF APOPTOTIC SIGNALING PATHWAY
Regulation of Apoptosis and Programmed Cell Death	4	-4	-0.3329	0.0004	SNW1|VNN1|HSPA1A|E2F2|IFI16|WNT1|STK24|CASP2|STK25|CASP4|HIF1A|WWOX|EIF2AK3|STYXL1|SYVN1|ATF2|IKBKE|TAF6|ZNF385A|IKBKG|TAF9|TAF9B|CDIP1|ERCC2|CDKN1A|CDKN2D|BRCA2|BCL2L1|TMBIM6|MIR16-1|SRC|TMEM109|CHEK2|POU4F2|TMEM117|CIDEB|TMEM161A|DAPK2|E2F1|ARHGEF2|MCL1|MMP2|CYP1B1|MMP9|MYBBP1A|TMEM238L|COA8|UBB|CREB3|PML|LCK|CUL2|TOPORS|CUL4A|CUL5|TP53BP2|YBX3|BCL2|TPT1|P4HB|PRODH|DDIAS|DDIT4|BRSK2|MAP2K1|LRRK…	334	GOBP_INTRINSIC_APOPTOTIC_SIGNALING_PATHWAY	-1.6855	0	GOBP_INTRINSIC_APOPTOTIC_SIGNALING_PATHWAY	INTRINSIC APOPTOTIC SIGNALING PATHWAY
Regulation of Apoptosis and Programmed Cell Death	4	-4	-0.5599	0.0003	BBC3|EI24|EIF5A|PLAGL2|BOK|MYC|SERINC3|VNN1|RPS7|BAD|FIS1|RIPK3|RPS3|RACK1|STYXL1|DDIT3|MTCH2|PMAIP1|TAF6|FBXW7|SKIL|FBH1|FLCN|BCL2L11|CLU|NKX3-1|TP73|MIR15A|MIR186|MIR16-1|NHERF1|NOX1|MCL1|MMP2|PRKRA|PTPN2|GSDME|UBB|RAD9A|NACC2|LCK|BAX|BECN1|SIAH1|RNF183|RPL26|MSX1|BID|S100A8|IL19|S100A9|IL20RA|SIRT1|SOD1|SFPQ|MIR27B|ADCY10|BCAP31|NUPR1|SEPTIN4|PARK7|BCLAF1|TP53|NCK1|TP53BP1|NCK2|CAV1|PIAS4	68	GOBP_POSITIVE_REGULATION_OF_INTRINSIC_APOPTOTIC_SIGNALING_PATHWAY	-2.1625	0	GOBP_POSITIVE_REGULATION_OF_INTRINSIC_APOPTOTIC_SIGNALING_PATHWAY	POSITIVE REGULATION OF INTRINSIC APOPTOTIC SIGNALING PATHWAY
Regulation of Apoptosis and Programmed Cell Death	2.61979	-2.61979	-0.3699	0.0262	CRIP1|SNW1|IFI16|MAEL|RPS3|CASP2|MTCH2|IKBKE|MARCHF7|ZNF385A|TAF9|TAF9B|CDIP1|NFATC4|CDKN1A|MIF|CDKN2D|BRCA2|BCL2L1|EPHA2|TMEM109|CHEK2|CIDEB|TMEM161A|E2F1|MCL1|MUC1|PML|NACC2|TOPORS|BAG6|BAX|BCL2|TPT1|DDIAS|DDIT4|SIRT1|UACA|SNAI1|SNAI2|URI1|SOD2|TRIM32|TNFRSF1A|TP53|DYRK2|PHLDA3|ATAD5|PIAS4|BBC3|BCL2A1|BCL2L10|BCL2L2|EI24|USP28|BCL3|USP47|BOK|ELL3|MYC|CCAR2|BAD|ACKR3|XPA|IER3|ERCC6|HIPK2|PPP2R5C…	111	GOBP_INTRINSIC_APOPTOTIC_SIGNALING_PATHWAY_IN_RESPONSE_TO_DNA_DAMAGE	-1.6419	0.0024	GOBP_INTRINSIC_APOPTOTIC_SIGNALING_PATHWAY_IN_RESPONSE_TO_DNA_DAMAGE	INTRINSIC APOPTOTIC SIGNALING PATHWAY IN RESPONSE TO DNA DAMAGE
Regulation of Apoptosis and Programmed Cell Death	4	-4	-0.3136	0	SLFN12|SPN|TNFSF11|SNW1|VNN1|SORT1|UBE4B|E2F2|SRPX|SST|SSTR3|SFRP1|ST20|STK24|STK25|ACSL5|HIF1A|WWOX|EIF2AK3|FXN|HYAL2|STYXL1|SYVN1|ATF2|TAF6|TAF9|TAF9B|CSNK2A2|SMAD3|KITLG|SMAD4|ERCC2|TFPT|TM2D1|BCL2L1|TMBIM1|BMF|TMBIM6|EYA1|TMC8|EYA2|MIR16-1|SRC|TMEM109|CHEK2|FAIM2|POU4F2|TMEM117|MIR221|PPARD|TMEM161A|DAPK2|FASLG|MIR222|PPARG|E2F1|MCL1|MMP2|MMP9|MYBBP1A|TMEM238L|SPI1|TNFRSF10C|UBB|PML|TNFRSF25|…	640	GOBP_APOPTOTIC_SIGNALING_PATHWAY	-1.6891	0	GOBP_APOPTOTIC_SIGNALING_PATHWAY	APOPTOTIC SIGNALING PATHWAY
Regulation of Apoptosis and Programmed Cell Death	4	-4	-0.3739	0.0013	VNN1|HSPA1A|WNT1|HIF1A|EIF2AK3|STYXL1|SYVN1|TAF6|ZNF385A|IKBKG|TAF9|TAF9B|CDKN2D|BCL2L1|TMBIM6|MIR16-1|SRC|TMEM161A|DAPK2|ARHGEF2|MCL1|MMP2|MMP9|UBB|CREB3|LCK|YBX3|BCL2|TPT1|P4HB|PRODH|DDIAS|MAP2K1|LRRK2|TRAP1|TXNDC12|SIRT1|SNAI1|XBP1|DNAJA1|SNAI2|MIR27B|HDAC1|URI1|MIR17|MIR19A|TRIM32|ATAD5|EI24|EIF5A|USP47|ELL3|ENO1|HSPB1|WFS1|ATF4|NONO|ERP29|CD74|HTRA2|DDIT3|PARP1|FBH1|CXCL12|FBXO7|FIGNL1|FLCN|…	194	GOBP_REGULATION_OF_INTRINSIC_APOPTOTIC_SIGNALING_PATHWAY	-1.7476	0.0001	GOBP_REGULATION_OF_INTRINSIC_APOPTOTIC_SIGNALING_PATHWAY	REGULATION OF INTRINSIC APOPTOTIC SIGNALING PATHWAY
Regulation of Apoptosis and Programmed Cell Death	4	-4	-0.3091	0.0002	TNFSF11|VNN1|DUSP1|SCIN|SPDEF|SRPX|VDR|ECSCR|SFRP1|STK17A|STK17B|WWOX|STUB1|HYAL2|STYXL1|ISL1|SYCE3|EMILIN1|EMILIN2|ITGA4|TAF6|SLIT2|JUN|SMAD4|TCTN3|IGF2R|PLEKHN1|TEX261|TFAP4|TFPT|ZC3H12A|BCL2L1|NCOA1|BMF|BRMS1|MIR15B|TMC8|MIR16-1|CHEK2|MIR19B1|POU4F2|CRYBA1|FAP|MIR221|DAPK2|FASLG|PPARG|TMEM196|E2F1|MCL1|MMP2|MMP9|MYBBP1A|PTRH2|SIK1|TNFAIP8|TLE5|TNFRSF10C|UBB|PML|FOXA1|RBM10|TNFRSF8|UNC5C|RET|TP…	582	GOBP_POSITIVE_REGULATION_OF_PROGRAMMED_CELL_DEATH	-1.6276	0	GOBP_POSITIVE_REGULATION_OF_PROGRAMMED_CELL_DEATH	POSITIVE REGULATION OF PROGRAMMED CELL DEATH
Regulation of Apoptosis and Programmed Cell Death	4	-4	-0.4385	0.0002	TNFSF11|CTNNA1|SERINC3|VNN1|LTB|LTBR|SRPX|SFRP1|RIPK3|RPS3|CASP2|TLR4|WWOX|HYAL2|STYXL1|TLR6|MAPK9|FAS|MTCH2|AGT|TAF6|FBXW7|JAK2|NFATC4|NGFR|NKX3-1|MIR26B|MIR15A|MIR449A|MIR186|MIR16-1|NOX1|FASLG|PPARG|MCL1|MMP2|UBB|CRADD|PML|APP|NACC2|LCK|RET|RIPK1|BAX|BCL10|TPD52L1|BECN1|SIAH1|TGFB2|TGFBR1|TRAF7|ITM2C|DEDD2|TRIM39|MSX1|SIRT1|MAL|TNFSF15|MIR27B|ADCY10|PPP2R1A|THBS1|SP1|MIR210|PEA15|WNT5A|ADORA2A…	154	GOBP_POSITIVE_REGULATION_OF_APOPTOTIC_SIGNALING_PATHWAY	-1.9699	0	GOBP_POSITIVE_REGULATION_OF_APOPTOTIC_SIGNALING_PATHWAY	POSITIVE REGULATION OF APOPTOTIC SIGNALING PATHWAY
Regulation of Apoptosis and Programmed Cell Death	2.48149	-2.48149	-0.4653	0.0337	BBC3|KDM1A|MUC1|USP28|BCL3|ELL3|PML|SNW1|TOPORS|BAG6|IFI16|BCL2|HNRNPK|EP300|HIPK2|PPP2R5C|DDIT4|CD74|RPL26|PYCARD|RPS27L|MARCHF7|ZNF385A|TAF9|TAF9B|SIRT1|MSH2|CDIP1|ING2|CDKN1A|MIF|NUPR1|URI1|BCL2L12|BRCA2|TP73|TRIAP1|HIPK1|TP63|TMEM109|CHEK2|TP53|DYRK2|AEN|CD44|SHISA5|PHLDA3|ATAD5	48	GOBP_INTRINSIC_APOPTOTIC_SIGNALING_PATHWAY_IN_RESPONSE_TO_DNA_DAMAGE_BY_P53_CLASS_MEDIATOR	-1.7624	0.0033	GOBP_INTRINSIC_APOPTOTIC_SIGNALING_PATHWAY_IN_RESPONSE_TO_DNA_DAMAGE_BY_P53_CLASS_MEDIATOR	INTRINSIC APOPTOTIC SIGNALING PATHWAY IN RESPONSE TO DNA DAMAGE BY P53 CLASS MEDIATOR
Regulation of Apoptosis and Programmed Cell Death	3.1549	-3.1549	-0.3284	0.01	UNC5B|TNFSF11|HSPA1A|SORT1|HSPA1B|C8ORF44-SGK3|SRPX|IFNG|SFRP1|CASP2|ACSL5|WWOX|YAP1|HYAL2|CASP8AP2|AGT|IL1B|SMAD3|KITLG|SMAD4|BCL2L1|TMBIM1|EYA1|TMC8|EYA2|SRC|FAIM2|MIR221|FASLG|MIR222|ARHGEF2|MCL1|SPI1|TNFRSF10C|CRADD|PML|CSF2|FEM1B|FGFR3|FOXO3|LGALS3|RET|RFFL|BCL2|DAPK1|FGFR1|TGFB1|TGFB2|TRADD|TRAF1|TGFBR1|GATA1|DDX47|DEDD|DEDD2|DELE1|DEPTOR|DIABLO|NGF|SNAI2|BLOC1S2|PPP2R1A|THBS1|CD27|CD70|NOS…	239	GOBP_EXTRINSIC_APOPTOTIC_SIGNALING_PATHWAY	-1.5684	0.0007	GOBP_EXTRINSIC_APOPTOTIC_SIGNALING_PATHWAY	EXTRINSIC APOPTOTIC SIGNALING PATHWAY
Regulation of Innate Inflammatory Signaling	4	-4	-0.3572	0.0005	TNC|SPN|STAT3|TNFRSF11A|TNFSF11|TNFSF4|SNX6|CDH5|SELE|ACE2|ARMH4|CD200R1L|FEM1A|HYAL2|FNDC4|ISL1|MIR3909|NLRP11|NLRP13|NLRP8|PSMA1|SMAD3|PSMB4|SETD6|MACIR|ETS1|MIR15B|MIR16-1|SRC|MIR19B1|MIR221|PPARD|MIR222|PPARG|MMP9|TNFAIP8L2|MAPK14|DUOXA2|MYD88|TAC1|FOXF1|APOE|C1QTNF3|TGFB1|TRADD|LPL|MDK|MIR141|RORA|SEMA7A|TMSB4X|UACA|ABHD12|GRN|MIR181A2|LPCAT3|DDT|GPSM3|NCF1|WNT5A|AHR|ADORA2A|TRPV4|BRD4|CCR2|…	451	GOBP_REGULATION_OF_INFLAMMATORY_RESPONSE	-1.7683	0	GOBP_REGULATION_OF_INFLAMMATORY_RESPONSE	REGULATION OF INFLAMMATORY RESPONSE
Regulation of Innate Inflammatory Signaling	2.65758	-2.65758	-0.5896	0.024	IL33|STAP1|SNCA|IFNGR2|TAFA3|CALHM2|IFNG|MIR181C|MMP8|AZU1|TLR1|TLR3|NR1D1|TTBK1|TLR6|TLR9|JAK2|IL1B|ITGB2|JUN|CTSC|CX3CL1|IFNGR1|CX3CR1|TREM2|CLU|ITGAM|SYT11|IL13|MIR128-1|PTPRC|LRP1|CST7|TNF|MAPT|APP|LRRK2|AIF1|KCNJ8|MIR142|IL6|MIR181B1|LDLR|C1QA|PSEN1|SMO|GRN|FPR2|CCL3|AGER|SPHK1|ZEB2|C5AR1|ADORA2A|CNTF|TYROBP|NAGLU	57	GOBP_GLIAL_CELL_ACTIVATION	-1.9002	0.0022	GOBP_GLIAL_CELL_ACTIVATION	GLIAL CELL ACTIVATION
Regulation of Innate Inflammatory Signaling	4	-4	-0.5015	0.0001	SNX4|STAP1|SNCA|IDO1|TNFRSF11A|TNFSF11|IL12B|TNFSF4|LGALS2|IL18|IL2|IL23A|RPS19|IFI35|S100A12|IFNG|TSLP|MMP8|ZP3|CASP12|TLR2|TLR3|CASP4|TLR4|CASP5|STAT5A|TTBK1|FEM1A|HYAL2|STAT5B|TLR6|TLR7|TLR9|AGT|AGTR1|TNIP1|IL1B|ADORA2B|PLA2G3|LILRA5|TREM2|ETS1|MAPK13|MIR206|MIR128-1|AIM2|APP|TAC1|LBP|RIPK1|KARS1|MIR21|TGFB1|ZBP1|TRADD|PLA2G7|LPL|BTK|LRRK2|MDK|ZDHHC5|ZDHHC9|MIR142|MIR144|LDLR|MAP3K8|GRN|GPR4|M…	166	GOBP_POSITIVE_REGULATION_OF_INFLAMMATORY_RESPONSE	-2.1518	0	GOBP_POSITIVE_REGULATION_OF_INFLAMMATORY_RESPONSE	POSITIVE REGULATION OF INFLAMMATORY RESPONSE
Regulation of Innate Inflammatory Signaling	2.284	-2.284	-0.3325	0.0463	SNX4|HAVCR2|SNX6|TSPAN32|HSPD1|CALHM2|IFI35|PRG3|IFNG|EDN2|IGHE|VAMP2|VAMP3|ANXA1|HYAL2|CBL|CSF1|ITGB2|JUN|CD2|IRF4|IRGM|ZC3H12A|ITGAM|MIR130A|SLC18A2|SRC|SYT11|CD33|CLEC12A|SPI1|CPLX2|CRLF2|LAT|LAT2|MYD88|CSF2|PTPN11|LBP|FOXF1|LCP2|CXCR2|LILRA2|DYSF|KARS1|FAM76B|BCR|TGFB1|FERRY3|GAB2|HAVCR1|GATA1|HSPA12A|LRRK2|LYN|DHRS2|KMT2E|RORA|LDLR|LRFN5|GRN|MILR1|MRGPRX2|MFHAS1|MT1G|NDRG1|THBS1|WNT5A|PTPRE|…	258	GOBP_MYELOID_LEUKOCYTE_ACTIVATION	-1.5238	0.0052	GOBP_MYELOID_LEUKOCYTE_ACTIVATION	MYELOID LEUKOCYTE ACTIVATION
Regulation of Innate Inflammatory Signaling	4	-4	-0.2993	0.0001	SERPINA3|SIGIRR|TNC|SPN|STAT3|TFRC|TNFRSF11A|TNFSF11|TNFSF4|TRPV1|COL6A1|VNN1|ABCD1|FAM114A1|IL17B|IL17C|HIF1A|HYAL2|ISL1|JUN|EZH2|KRT16|MIR324|MACIR|ZC3H12A|ZFP36|MIR15B|MIR16-1|MIR19B1|MIR221|MIR222|MMP9|HNRNPA0|MAPK14|PXK|MAPKAPK2|MYD88|TIRAP|APOE|C1QTNF3|LPL|MIR141|LY75|RORA|SIGLEC1|SEMA7A|SMO|LPCAT3|THBS1|DDT|TIMP1|GPSM3|PARP4|ADAM17|ADCY7|GSDMB|MSMP|NCF1|WNT5A|AHR|ADORA2A|ZNF580|AFAP1L2|ITG…	961	GOBP_INFLAMMATORY_RESPONSE	-1.6145	0	GOBP_INFLAMMATORY_RESPONSE	INFLAMMATORY RESPONSE
Regulation of Innate Inflammatory Signaling	2.26761	-2.26761	-0.5409	0.0473	IL33|STAP1|SNCA|IFNGR2|TAFA3|CALHM2|IFNG|MIR181C|MMP8|SCNN1B|AZU1|TLR1|TLR3|NR1D1|TTBK1|TLR6|TLR9|JAK2|ITGB2|JUN|CTSC|CX3CL1|IFNGR1|CX3CR1|TREM2|CLU|ITGAM|SYT11|IL13|MIR128-1|PTPRC|CST7|TNF|MAPT|MYD88|APP|LRRK2|AIF1|KCNJ8|MIR142|IL6|LDLR|C1QA|GRN|FPR2|CCL3|AGER|SPHK1|C5AR1|TRAF3IP2|TYROBP|NAGLU	52	GOBP_LEUKOCYTE_ACTIVATION_INVOLVED_IN_INFLAMMATORY_RESPONSE	-1.7632	0.0054	GOBP_LEUKOCYTE_ACTIVATION_INVOLVED_IN_INFLAMMATORY_RESPONSE	LEUKOCYTE ACTIVATION INVOLVED IN INFLAMMATORY RESPONSE
Regulation of mRNA Metabolism and Turnover	2.76955	2.76955	0.6751	0.0202	EIF4ENIF1|TNRC6A|CPEB3|TOB1|POLR2G|CNOT7|TENT4A|TENT4B|TNRC6B|TNRC6C|BTG2|ZFP36|AGO2|PABPC1|CNOT1	15	GOBP_REGULATION_OF_NUCLEAR_TRANSCRIBED_MRNA_POLY_A_TAIL_SHORTENING	1.8965	0.0017	GOBP_REGULATION_OF_NUCLEAR_TRANSCRIBED_MRNA_POLY_A_TAIL_SHORTENING	REGULATION OF NUCLEAR TRANSCRIBED MRNA POLY A TAIL SHORTENING
Regulation of mRNA Metabolism and Turnover	3	3	0.5548	0.0133	EIF4ENIF1|PAN3|TNKS1BP1|TENT4A|TENT4B|CNOT10|CNOT4|CNOT11|BTG2|CNOT6|CNOT6L|CNOT8|CNOT3|PABPC1|CNOT1|CNOT2|PARN|PNLDC1|SAMD4A|SAMD4B|TNRC6A|CPEB3|TOB1|MLH1|POLR2G|CNOT7|TNRC6B|TNRC6C|PAN2|ZFP36|AGO2|CNOT9	32	GOBP_NUCLEAR_TRANSCRIBED_MRNA_POLY_A_TAIL_SHORTENING	1.9293	0.001	GOBP_NUCLEAR_TRANSCRIBED_MRNA_POLY_A_TAIL_SHORTENING	NUCLEAR TRANSCRIBED MRNA POLY A TAIL SHORTENING
Regulation of mRNA Metabolism and Turnover	3.1549	3.1549	0.3717	0.0107	ROCK2|MIR340|MIR519A1|MIR203A|SNW1|MIRLET7C|MIR501|MIR665|CLNS1A|SLC39A5|CPEB3|DHX36|DND1|FTO|HNRNPD|KHSRP|PIWIL1|MOV10|PIWIL2|EXOSC10|PLEKHN1|PUM1|PNPT1|PUM2|RBM24|RC3H1|TARDBP|TRIM71|UPF1|ZC3H12A|ZC3H12D|ZFP36|MIR130A|ZFP36L1|ALKBH5|ZFP36L2|MIR19B1|MEX3D|ELAVL1|NANOS1|METTL16|PRR5L|QKI|TENT4A|TENT4B|BTG2|PRPF19|MIR151A|MIR181A2|NCBP1|MIR181D|MIR27A|MIR27B|MIR140|MIR302C|MIR146A|MIR135B|MIR18A|M…	237	GOBP_POSITIVE_REGULATION_OF_MRNA_METABOLIC_PROCESS	1.6449	0.0007	GOBP_POSITIVE_REGULATION_OF_MRNA_METABOLIC_PROCESS	POSITIVE REGULATION OF MRNA METABOLIC PROCESS
Regulation of mRNA Metabolism and Turnover	2.88606	2.88606	0.3068	0.0168	ROCK2|SLTM|MIR203A|SNW1|MIR501|SON|MIR665|SLC39A5|CPEB3|DHX36|DND1|FTO|HNRNPD|KHSRP|TENT5B|MOV10|EXOSC10|PLEKHN1|PUM1|PNPT1|PUM2|RBM24|RC3H1|TARDBP|TRIM71|TENT5C|UPF1|ZC3H12A|ZC3H12D|ZFP36|MIR130A|ZFP36L1|ZFP36L2|ANGEL2|ARID5A|MIR19B1|BOLL|MEX3D|DAZ1|DAZ2|E2F1|DAZ3|DAZ4|DAZL|ELAVL1|ELAVL4|NANOS1|HNRNPA0|HNRNPC|LARP4B|MAPK14|MAPKAPK2|METTL16|MYD88|NICOL1|PRR5L|QKI|RBM10|RBM38|RBM47|TENT4A|TENT4B|T…	407	GOBP_REGULATION_OF_MRNA_METABOLIC_PROCESS	1.4974	0.0013	GOBP_REGULATION_OF_MRNA_METABOLIC_PROCESS	REGULATION OF MRNA METABOLIC PROCESS
Regulation of mRNA Metabolism and Turnover	3.1549	3.1549	0.4039	0.0106	ROCK2|MIR340|MIR519A1|MIR203A|MIRLET7C|MIR501|MIR665|CPEB3|DHX36|DND1|FTO|HNRNPD|KHSRP|PIWIL1|MOV10|PIWIL2|PLEKHN1|PUM1|PNPT1|PUM2|RBM24|RC3H1|TARDBP|TRIM71|UPF1|ZC3H12A|ZC3H12D|ZFP36|MIR130A|ZFP36L1|ALKBH5|ZFP36L2|MIR19B1|MEX3D|ELAVL1|NANOS1|METTL16|PRR5L|QKI|TENT4A|TENT4B|BTG2|MIR151A|MIR181A2|MIR181D|MIR27A|MIR27B|MIR140|MIR302C|MIR146A|MIR135B|MIR18A|MIR19A|MIR200B|MIR491|MIR200C|MIR210|MIR54…	202	GOBP_POSITIVE_REGULATION_OF_MRNA_CATABOLIC_PROCESS	1.733	0.0007	GOBP_POSITIVE_REGULATION_OF_MRNA_CATABOLIC_PROCESS	POSITIVE REGULATION OF MRNA CATABOLIC PROCESS
Regulation of mRNA Metabolism and Turnover	2.67778	2.67778	0.3582	0.024	DCPS|EIF4ENIF1|LSM1|PAN3|PATL1|PATL2|SMG9|EIF3E|LSM4|EIF4A3|LSM7|ETF1|CPEB3|DHX36|GSPT2|GTPBP2|HNRNPD|DIS3L2|HBS1L|EXOSC10|MRTO4|PDE12|NBDY|SMG7|RC3H1|NT5C3B|PABPN1L|UPF1|UPF2|PAN2|ZC3H12A|ZFP36|TUT1|ZFP36L1|ZFP36L2|PNRC1|PNRC2|TNKS1BP1|PYM1|TENT4A|YBX1|TENT4B|HNRNPAB|A1CF|APOBEC1|CASC3|SKIC2|BTG2|SKIC3|TESK1|PELO|SKIC8|MAGOHB|SECISBP2|NOCT|PNLDC1|SAMD4A|SAMD4B|XRN1|GSPT1|SMG8|SSB|UPF3A|NCBP1|PAI…	129	GOBP_NUCLEAR_TRANSCRIBED_MRNA_CATABOLIC_PROCESS	1.584	0.0021	GOBP_NUCLEAR_TRANSCRIBED_MRNA_CATABOLIC_PROCESS	NUCLEAR TRANSCRIBED MRNA CATABOLIC PROCESS
Regulation of mRNA Metabolism and Turnover	2.42022	2.42022	0.4414	0.0375	DCPS|EIF4ENIF1|LSM1|PAN3|PATL1|PATL2|CAPRIN1|CSDE1|CNOT3|PABPC1|CPEB3|DIS3|TOB1|DHX36|MLH1|HNRNPD|PDE12|CNOT7|RC3H1|NT5C3B|PABPN1L|PAN2|ZFP36|DHX9|ZFP36L1|ZFP36L2|HNRNPU|CNOT9|SYNCRIP|TNKS1BP1|TENT4A|YBX1|TENT4B|CNOT10|CNOT4|CNOT11|RC3H2|BTG2|CNOT6|CNOT6L|DCP2|CNOT8|CNOT1|CNOT2|NOCT|PARN|PNLDC1|SAMD4A|SAMD4B|TNRC6A|POLR2G|PAIP1|IGF2BP1|TNRC6B|TNRC6C|AGO2|DCP1A|DCP1B	58	GOBP_NUCLEAR_TRANSCRIBED_MRNA_CATABOLIC_PROCESS_DEADENYLATION_DEPENDENT_DECAY	1.7427	0.0038	GOBP_NUCLEAR_TRANSCRIBED_MRNA_CATABOLIC_PROCESS_DEADENYLATION_DEPENDENT_DECAY	NUCLEAR TRANSCRIBED MRNA CATABOLIC PROCESS DEADENYLATION DEPENDENT DECAY
Respiratory Chain Assembly and Mitochondrial Apoptotic Signaling	4	-4	-0.5818	0.0002	BBC3|BCL2A1|BCL2L10|BCL2L2|BIK|IGF1|BNIP3|BOK|GHITM|FAM162A|BAD|FZD9|GGCT|GPX1|HIGD1A|HRK|IFI6|LMNA|MLLT11|MOAP1|FXN|NOL3|PARL|AKT1|PLAUR|PLSCR3|PMAIP1|PRELID1|PSMD10|SMAD3|SFN|TIMM50|BCL2L11|CLU|OPA1|TNFSF10|GPER1|TP73|TRIAP1|BCL2L1|BMF|MCL1|MMP9|HGF|BAX|PINK1|BCL2|PPIF|PRKN|PYCARD|ATP7A|BAK1|BID|SOD2|TP53	55	GOBP_RELEASE_OF_CYTOCHROME_C_FROM_MITOCHONDRIA	-2.2039	0	GOBP_RELEASE_OF_CYTOCHROME_C_FROM_MITOCHONDRIA	RELEASE OF CYTOCHROME C FROM MITOCHONDRIA
Respiratory Chain Assembly and Mitochondrial Apoptotic Signaling	2.56864	-2.56864	-0.4988	0.0282	COA8|CYBA|COX17|STMP1|CEP89|HCCS|MT-CO3|FXN|SLC25A33|TTC19|SURF1|SCO1|UQCC2|SCO2|UQCC3|BCS1L|COA1|SLC25A46|COA3|COA4|LYRM7|UQCRFS1|COA5|COA7|COA6|COX14|COX15|COX10|COX16|COX18|COX20|FASTKD3|PET100|PET117|SMIM20|TIMM21|TMEM223|UQCC1|UQCC4|UQCC5|UQCC6|COX19|TACO1	43	GOBP_CYTOCHROME_COMPLEX_ASSEMBLY	-1.7905	0.0027	GOBP_CYTOCHROME_COMPLEX_ASSEMBLY	CYTOCHROME COMPLEX ASSEMBLY
Respiratory Chain Assembly and Mitochondrial Apoptotic Signaling	4	-4	-0.7527	0.0001	BAK1|BBC3|PLAUR|PMAIP1|BID|BIK|BNIP3|FAM162A|BAD|BCL2L11|TNFSF10|BAX|GPER1|PINK1|HRK|BMF|MLLT11|MOAP1|TP53|MMP9|PYCARD	21	GOBP_POSITIVE_REGULATION_OF_RELEASE_OF_CYTOCHROME_C_FROM_MITOCHONDRIA	-2.3172	0	GOBP_POSITIVE_REGULATION_OF_RELEASE_OF_CYTOCHROME_C_FROM_MITOCHONDRIA	POSITIVE REGULATION OF RELEASE OF CYTOCHROME C FROM MITOCHONDRIA
Respiratory Chain Assembly and Mitochondrial Apoptotic Signaling	4	-4	-0.5128	0	ATP23|COX17|STMP1|MIURF|MT-ND1|MT-ND2|FXN|MT-ND4|MT-ND5|MT-ND6|TMEM126A|IMMP2L|LYRM7|NDUFA13|NDUFA6|NDUFAF1|NDUFB2|NDUFB3|COA8|NDUFC2|NUBPL|NDUFS1|NDUFS2|NDUFS3|NDUFS4|NDUFS5|NDUFS6|NDUFS7|NDUFS8|OXA1L|NDUFAF5|SDHAF2|SDHAF4|NDUFAF4|SDHAF3|SLC25A33|SURF1|UQCC2|UQCC3|UQCRFS1|COX19|FMC1|HIGD1A|CHCHD4|SCO1|SAMM50|SCO2|BCS1L|COA1|NDUFAF7|COA3|COA4|COA5|COX14|COX16|COX18|COX20|FASTKD3|RAB5IF|PET100|PET…	103	GOBP_MITOCHONDRIAL_RESPIRATORY_CHAIN_COMPLEX_ASSEMBLY	-2.2265	0	GOBP_MITOCHONDRIAL_RESPIRATORY_CHAIN_COMPLEX_ASSEMBLY	MITOCHONDRIAL RESPIRATORY CHAIN COMPLEX ASSEMBLY
Respiratory Chain Assembly and Mitochondrial Apoptotic Signaling	3.30103	-3.30103	-0.3958	0.0084	IGF1|TFRC|DDHD2|GHITM|HSPA1A|HDAC6|GPX1|INF2|VPS35|HUWE1|FXN|AKT1|MTCH2|SIVA1|AURKA|SPIRE1|IRGM|GCLC|BCL2L1|BMF|PID1|PPARG|MMP9|HGF|MAPT|ZDHHC6|SLC25A31|BAX|PINK1|PPIF|SLC25A6|LRRK2|SIRT7|TMEM135|MARCHF5|PLD6|PRMT6|GSK3A|RALBP1|MSTO1|TP53|VAT1|ENDOG|MGARP|BBC3|BIK|BNIP3|BOK|DNM1L|FAM162A|PDE2A|BAD|FIS1|FZD9|GSK3B|HIGD1A|HRK|IER3|YME1L1|IFI6|ADCK1|LMNA|MLLT11|C11ORF65|MOAP1|ACAA2|MPV17L|MUL1|NOL3|…	118	GOBP_REGULATION_OF_MITOCHONDRION_ORGANIZATION	-1.7489	0.0005	GOBP_REGULATION_OF_MITOCHONDRION_ORGANIZATION	REGULATION OF MITOCHONDRION ORGANIZATION
Respiratory Chain Assembly and Mitochondrial Apoptotic Signaling	2.3279	-2.3279	-0.4535	0.0429	NDUFC2|NUBPL|NDUFS1|NDUFS2|NDUFS3|NDUFAF2|NDUFS4|NDUFS5|NDUFS6|NDUFS7|NDUFS8|ECSIT|OXA1L|MIURF|NDUFAF5|TMEM70|DMAC1|NDUFAF4|FOXRED1|LYRM2|MT-ND1|ACAD9|MT-ND2|NDUFAF3|NDUFAF6|MT-ND4|NDUFAF8|MT-ND5|TIMMDC1|MT-ND6|TMEM126A|TMEM126B|DMAC2|TMEM186|BCS1L|COA1|NDUFAF7|NDUFA13|NDUFA6|NDUFAF1|TIMM21|NDUFB2|NDUFB3	43	GOBP_NADH_DEHYDROGENASE_COMPLEX_ASSEMBLY	-1.6614	0.0047	GOBP_NADH_DEHYDROGENASE_COMPLEX_ASSEMBLY	NADH DEHYDROGENASE COMPLEX ASSEMBLY
Respiratory Chain Assembly and Mitochondrial Apoptotic Signaling	4	-4	-0.6389	0.0001	BBC3|BIK|IGF1|BNIP3|HGF|GHITM|FAM162A|BAD|GPX1|BAX|HIGD1A|PINK1|HRK|PPIF|IFI6|LMNA|MLLT11|MOAP1|PRKN|FXN|NOL3|PARL|PYCARD|AKT1|BAK1|PLAUR|PLSCR3|PMAIP1|BID|PRELID1|PSMD10|BCL2L11|CLU|OPA1|TNFSF10|GPER1|TRIAP1|BCL2L1|BMF|TP53|MMP9	41	GOBP_REGULATION_OF_RELEASE_OF_CYTOCHROME_C_FROM_MITOCHONDRIA	-2.2715	0	GOBP_REGULATION_OF_RELEASE_OF_CYTOCHROME_C_FROM_MITOCHONDRIA	REGULATION OF RELEASE OF CYTOCHROME C FROM MITOCHONDRIA
Respiratory Chain Assembly and Mitochondrial Apoptotic Signaling	4	-4	-0.3361	0	ATP23|STAT3|TFRC|COL6A1|ERBB4|CHCHD6|SLC25A36|FXN|SUPV3L1|ATF2|SMAD3|TMEM11|PNPT1|PUM2|SPIRE1|BCL2L1|BMF|CLUH|EYA2|PPARG|MCL1|MMP9|SLC25A31|SLC25A6|SDHAF3|SIRT7|MGME1|SESN2|NEURL4|AGTPBP1|BLOC1S2|KIF28P|FEZ1|HK2|MGARP|WASF1|SPG7|PRIMPOL|YME1L1|HTRA2|CALM3|SLIRP|CIBAR1|CNTNAP1|KDR|GBA1|GPER1|RAB5IF|HIP1R|P2RX7|AFG1L|VPS13A|CLPP|CLN8|THG1L|EPM2A|RAB32|ATP5F1D|ATP5IF1|ATP7A|DMAC2|BCL2L13|BID|CHCHD10…	432	GOBP_MITOCHONDRION_ORGANIZATION	-1.7466	0	GOBP_MITOCHONDRION_ORGANIZATION	MITOCHONDRION ORGANIZATION
Respiratory Chain Assembly and Mitochondrial Apoptotic Signaling	4	-4	-0.4605	0.0003	IGF1|GHITM|HSPA1A|ERBB4|HSPD1|GPX1|VPS35|FXN|AKT1|MTCH2|ATF2|SIVA1|IFIT2|SMAD3|GCLC|BCL2L1|GCLM|BMF|EYA2|MIR29A|MIR29B1|MCL1|MIR29C|MMP9|HGF|SLC25A31|BAX|PINK1|BCL2|PPIF|SLC25A6|LRRK2|BLOC1S2|MIR17|SOD2|ATP2A1|GSK3A|TP53|HK2|AIFM2|ATG3|BBC3|BCL2A1|BCL2L10|BCL2L2|BIK|BNIP3|PPM1K|BNIP3L|BOK|CCAR2|DAP3|DNM1L|FAM162A|BAD|FIS1|FMC1|FZD9|GGCT|GSK3B|HIGD1A|HRK|IER3|IFI6|JTB|LMNA|MLLT11|MOAP1|ACAA2|MPV17…	112	GOBP_APOPTOTIC_MITOCHONDRIAL_CHANGES	-2.0107	0	GOBP_APOPTOTIC_MITOCHONDRIAL_CHANGES	APOPTOTIC MITOCHONDRIAL CHANGES
Response to interferon beta	4	-4	-0.6662	0.0007	IFITM1|IFITM2|STAT1|STING1|ACOD1|IFITM3|IFNAR1|AIM2|CAMK2A|DDX41|IFNAR2|PYDC5|GPR146|PYHIN1|CDC34|XAF1|IFI16|UBE2G2|UBE2K|TLR3|BST2|HTRA2|OAS1|CALM1|IKBKE|IFNB1|NDUFA13|IRF1|PNPT1|TRIM6|IRGM|SHFL|TREX1|PLSCR1|HCN1|MNDA|CAPN2	37	GOBP_RESPONSE_TO_INTERFERON_BETA	-2.1984	0	GOBP_RESPONSE_TO_INTERFERON_BETA	RESPONSE TO INTERFERON BETA
Response to interferon beta	3.09691	-3.09691	-0.6506	0.0112	IFITM2|STAT1|STING1|ACOD1|IFNAR1|AIM2|CAMK2A|DDX41|IFNAR2|PYDC5|PYHIN1|CDC34|IFI16|UBE2G2|UBE2K|TLR3|HTRA2|OAS1|CALM1|IFNB1|NDUFA13|IRF1|PNPT1|TRIM6|IRGM|TREX1|HCN1|MNDA|CAPN2	29	GOBP_CELLULAR_RESPONSE_TO_INTERFERON_BETA	-1.9797	0.0008	GOBP_CELLULAR_RESPONSE_TO_INTERFERON_BETA	CELLULAR RESPONSE TO INTERFERON BETA
Response to interleukin 1	3.09691	-3.09691	-0.421	0.0112	HYAL1|SIGIRR|SNCA|TNFRSF11A|HES1|TAX1BP1|HYAL3|SELE|LGALS9|IL1RAP|IL1RL2|SFRP1|ANKRD1|HAS2|MAP2K7|HIF1A|HYAL2|YY1|YTHDC2|IKBKB|TAF9|IL1B|TNIP2|ADAMTS12|ADAMTS7|IRAK1|IRAK2|IRAK3|TRAF6|IRAK4|RC3H1|NKX3-1|MIR204|UPF1|GCLC|ZC3H12A|IGBP1|MAPK13|SRC|MAPK11|MMP2|CAMP|TLE5|ACOD1|MYD88|APP|MIR766|PLCB1|MTHFR|MIR21|ZBP1|HDAC4|MIR101-1|NLRP7|MAP3K7|MIR142|RORA|CHI3L1|MYLK3|SLC30A8|MIR27A|SOX9|TRIM63|MIR146…	118	GOBP_RESPONSE_TO_INTERLEUKIN_1	-1.782	0.0008	GOBP_RESPONSE_TO_INTERLEUKIN_1	RESPONSE TO INTERLEUKIN 1
Response to interleukin 1	4	-4	-0.4967	0.0013	HYAL1|SIGIRR|EGR1|VRK2|CFL1|NFKBIA|HES1|TAX1BP1|HYAL3|IL1RAP|IL1RL2|CCL5|SFRP1|CD40|ANKRD1|HAS2|MAP2K7|HIF1A|NR1D1|HYAL2|YY1|MAPK3|IKBKB|OTUD4|IL1B|INHBB|TNIP2|ADAMTS12|ADAMTS7|IRAK1|IRAK2|IRAK3|TRAF6|IRAK4|ZNF675|KLF2|RC3H1|NKX3-1|UPF1|RPS6KA5|ZC3H12A|SIRPA|MAPK13|MAPK11|MMP2|FGB|AKAP12|CAMP|ACOD1|CEBPB|DAB2IP|CCL2|EDN1|PYDC1|MYD88|MIR766|TANK|PLCB1|IL1R2|RPS6KA4|RBMX|ST18|MIR21|RELA|ZBP1|TOLLIP…	90	GOBP_CELLULAR_RESPONSE_TO_INTERLEUKIN_1	-2.0114	0.0001	GOBP_CELLULAR_RESPONSE_TO_INTERLEUKIN_1	CELLULAR RESPONSE TO INTERLEUKIN 1
Response to type ii interferon	3.39794	-3.39794	-0.4385	0.0062	ACTG1|STXBP1|ACTR2|IFNGR2|ACTR3|IL12B|IL12RB1|HCK|LGALS9|IFNG|CDC37|VAMP3|TLR2|VAMP4|TLR3|VPS26B|TLR4|DNAJA3|JAK2|VIM|CLDN1|IFNGR1|PDE12|IRF1|IRGM|FASLG|PPARG|TXK|ACOD1|EPRS1|DAPK1|PIM1|NLRC5|AIF1|MRC1|PARP14|PARP9|WNT5A|CD47|TP53|CDC42|TYK2|ADAMTS13|KIF5B|CDC42EP2|AQP4|CDC42EP4|CASP1|JAK1|RAB20|CRIPTO|GSN|CCL5|ZYX|CD200|NOS2|NR1H3|CD58|CALM1|OTOP1|CIITA|FCAR|SP100|DAPK3|SIRPA|MYO1C|ASS1|PTPN2|SL…	102	GOBP_CELLULAR_RESPONSE_TO_TYPE_II_INTERFERON	-1.8302	0.0004	GOBP_CELLULAR_RESPONSE_TO_TYPE_II_INTERFERON	CELLULAR RESPONSE TO TYPE II INTERFERON
Response to type ii interferon	4	-4	-0.49	0.0001	ACTG1|IFITM1|IFITM2|SNCA|IFITM3|STXBP1|ACTR2|IFNGR2|ACTR3|IL12B|IL12RB1|IL23R|HCK|LGALS9|IFNG|CDC37|VAMP3|TLR2|VAMP4|TLR3|VPS26B|TLR4|DNAJA3|JAK2|VIM|CLDN1|ZNF697|IFNGR1|PDE12|LCN10|IRF1|TRIM21|IRGM|FASLG|PPARG|TXK|ACOD1|EPRS1|KYNU|DAPK1|PIM1|NLRC5|AIF1|BST2|MRC1|NUB1|MEFV|SLC30A8|PARP14|PARP9|SLC22A5|WNT5A|CD47|TP53|CDC42|TYK2|ADAMTS13|KIF5B|CDC42EP2|UBD|AQP4|CDC42EP4|CASP1|JAK1|RAB20|CRIPTO|GSN…	128	GOBP_RESPONSE_TO_TYPE_II_INTERFERON	-2.1251	0	GOBP_RESPONSE_TO_TYPE_II_INTERFERON	RESPONSE TO TYPE II INTERFERON
Ribonucleoprotein and Ribosomal Subunit Assembly	3.30103	-3.30103	-0.4647	0.008	DHX29|NGRN|BRIX1|DDX28|MTERF4|EIF1AX|EIF5B|ERAL1|RRP7A|METTL17|RPS19|MIURF|MPV17L2|MRPS2|MRPS7|MTERF3|MTG1|FAU|MTG2|BOP1|NIP7|NOP53|RCC1L|MPV17L|RRP7BP|EIF5|RPL11|ABT1|MRM2|FASTKD2|NOP2|MRTO4|RPSA|RPS15|RPL24|DHX30|DHX37|SBDS|PRKDC|RPL5|DDX3X|MCAT|RPS14|EIF6|RPL38|XRCC5|RPS27|RPS28|RPS5|NOA1|EFL1|NPM1|RPS27L|RPS6|VCX|C1QBP|RPF2|RPL10L|EIF2A|RRS1|RPSA2|PWP2|MDN1	63	GOBP_RIBOSOME_ASSEMBLY	-1.8261	0.0005	GOBP_RIBOSOME_ASSEMBLY	RIBOSOME ASSEMBLY
Ribonucleoprotein and Ribosomal Subunit Assembly	3.69897	-3.69897	-0.6785	0.0034	RPS6|ABT1|MCAT|RPS14|RPSA|ERAL1|RRP7A|RPS15|METTL17|RPS19|XRCC5|MRPS7|RPS27|FAU|RPS28|RPSA2|RCC1L|PWP2|RPS5|RRP7BP|PRKDC|RPS27L	22	GOBP_RIBOSOMAL_SMALL_SUBUNIT_ASSEMBLY	-2.0886	0.0002	GOBP_RIBOSOMAL_SMALL_SUBUNIT_ASSEMBLY	RIBOSOMAL SMALL SUBUNIT ASSEMBLY
Ribonucleoprotein and Ribosomal Subunit Assembly	2.85387	-2.85387	-0.3115	0.0172	TFB2M|UTP4|UTP6|DDX27|FBL|WDR3|WDR46|DDX51|EBNA1BP2|ESF1|BRIX1|C1D|KRR1|WDR74|NOC4L|NOP56|NOP58|PDCD11|PIN4|POP4|POP5|POP7|RBFA|REXO1|RRP7BP|REXO1L1P|REXO5|RPP25|RPP30|RPP38|RPL11|RRP1|RRP9|RPL14|PES1|UTP14A|UTP18|WDR55|YBEY|EXOSC10|ERCC2|RPL27|RPS15|UTP25|RPL35|RPL35A|SBDS|SUV39H1|RPL5|RPL7|RPL7A|DDX10|EMG1|FBLL1|METTL16|RPS14|RPS16|RPS17|TENT4B|RPS21|RPS24|RPS25|RPS27|RPS28|NOL6|RPS8|SIRT7|DDX4…	222	GOBP_RRNA_PROCESSING	-1.5286	0.0014	GOBP_RRNA_PROCESSING	RRNA PROCESSING
Ribonucleoprotein and Ribosomal Subunit Assembly	4	-4	-0.3377	0.0001	AIRIM|TFB2M|UTP4|C1ORF131|UTP6|DDX27|FBL|WDR3|DDX31|WDR46|DDX51|DNTTIP2|DHX29|EBNA1BP2|ESF1|BRIX1|GNL2|C1D|GTF3A|DDX28|GTPBP10|EIF1AX|ISG20L2|EIF5B|KRR1|WDR74|ERAL1|NOC4L|NOP16|METTL17|NOP56|MIURF|NOP58|MPV17L2|PDCD11|MRPS2|PIN4|MRPS7|PNO1|MTERF3|POP4|RPS12|MTG1|POP5|MTG2|POP7|NIP7|RBFA|ABCF1|RBIS|RCC1L|REXO1|RRP7BP|REXO1L1P|REXO5|EIF5|RPP25|RPP30|RPP38|RPS19BP1|RPL11|RRP1|RRP9|RPL14|RSL24D1|SURF…	320	GOBP_RIBOSOME_BIOGENESIS	-1.7338	0	GOBP_RIBOSOME_BIOGENESIS	RIBOSOME BIOGENESIS
Ribonucleoprotein and Ribosomal Subunit Assembly	2.61979	-2.61979	-0.2919	0.0257	TFB2M|UTP4|UTP6|DDX27|FBL|SLFN12|WDR3|WDR46|DDX51|EBNA1BP2|ESF1|BRIX1|C1D|GTF3A|KRR1|WDR74|NOC4L|NOP56|NOP58|PDCD11|PIN4|POP4|POP5|POP7|ANG|RBFA|REXO1|RRP7BP|REXO1L1P|REXO5|CAVIN1|RPP25|RPP30|RPP38|RPL11|RRP1|RRP9|RPL14|PES1|UTP14A|UTP18|WDR55|YBEY|EXOSC10|ERCC2|RPL27|RPS15|TOP1|UTP25|RPL35|RPL35A|SBDS|SUV39H1|RPL5|RPL7|RPL7A|DDX10|EMG1|FBLL1|METTL16|RPS14|RPS16|RPS17|TENT4B|RPS21|RPS24|RPS25|PEL…	266	GOBP_RRNA_METABOLIC_PROCESS	-1.4646	0.0024	GOBP_RRNA_METABOLIC_PROCESS	RRNA METABOLIC PROCESS
Ribonucleoprotein and Ribosomal Subunit Assembly	2.85387	-2.85387	-0.2602	0.0175	AIRIM|TFB2M|C1ORF131|DICER1|DDX27|DDX31|DDX51|DNTTIP2|SMN1|DHX29|EBNA1BP2|SMN2|ESF1|EIF2S2|GNL2|EIF2S3|GTF3A|EIF2S3B|GTPBP10|EIF3A|ISG20L2|EIF3B|KRR1|EIF3C|NOC4L|EIF3CL|NOP16|EIF3E|NOP56|EIF3F|NOP58|EIF3G|PDCD11|EIF3H|PIN4|EIF3I|PNO1|EIF3J|POP4|RPS12|EIF3K|POP5|EIF3L|POP7|EIF3M|RBFA|ABCF1|RBIS|REXO1|EIF4B|HSP90AB1|REXO1L1P|EIF4H|REXO5|EIF5|RPP25|RPP30|MCTS2|RPP38|RPS19BP1|RPL11|RRP1|RRP9|RPL14|RS…	494	GOBP_RIBONUCLEOPROTEIN_COMPLEX_BIOGENESIS	-1.3834	0.0014	GOBP_RIBONUCLEOPROTEIN_COMPLEX_BIOGENESIS	RIBONUCLEOPROTEIN COMPLEX BIOGENESIS
Ribonucleoprotein and Ribosomal Subunit Assembly	2.37675	-2.37675	-0.4049	0.0403	AIRIM|EBNA1BP2|BRIX1|WDR12|GTF3A|DDX28|RPL7L1|WDR74|NOP16|MIURF|MTG1|FTSJ3|MTG2|BOP1|NIP7|NOP53|RCC1L|ZNF622|RPL11|RPL14|RSL24D1|SURF6|MRM2|PES1|TMA16|FASTKD2|NOP2|AFG2A|MRTO4|RPL26L1|AFG2B|CINP|RPL24|ZNHIT3|DHX30|NLE1|ZNHIT6|RPL35|RPL35A|TRMT112|DDX18|RPL5|RPL7|RPL7A|EIF6|HEATR3|LTO1|NOC2L|NPM1|RPL26|NOL9|GTPBP4|NVL|LAS1L|MAK16|NSA2|RPF1|RRP15|URB1|PAK1IP1|PPAN|RBM34|RPF2|RPL10L|RRS1|MDN1|MALSU1…	68	GOBP_RIBOSOMAL_LARGE_SUBUNIT_BIOGENESIS	-1.63	0.0042	GOBP_RIBOSOMAL_LARGE_SUBUNIT_BIOGENESIS	RIBOSOMAL LARGE SUBUNIT BIOGENESIS
Ribonucleoprotein and Ribosomal Subunit Assembly	4	-4	-0.464	0.0001	UTP4|C1ORF131|UTP6|FBL|WDR3|WDR46|DNTTIP2|KRR1|ERAL1|METTL17|NOP56|RPS19|NOP58|MRPS7|PNO1|RPS12|RCC1L|LSM6|RRP7BP|DCAF13|RPS19BP1|RRP9|SURF6|ABT1|UTP18|EXOSC10|ERCC2|RPSA|RPS15|GTF2H5|DHX37|UTP25|EMG1|RPS11|RPS13|RPS14|RPS16|RPS17|RPS21|RPS23|XRCC5|RPS24|RPS25|RPS27|RPS27A|RPS28|RPS4X|AATF|NOL6|RPS5|RPS8|RPS9|NPM1|RPS6|NOM1|UTP3|RIOK2|RRS1|RPSA2|LTV1|UTP15|WDR75|UTP11|RPS7|RRP7A|DIMT1|FAU|RPS15A|…	108	GOBP_RIBOSOMAL_SMALL_SUBUNIT_BIOGENESIS	-2.0775	0	GOBP_RIBOSOMAL_SMALL_SUBUNIT_BIOGENESIS	RIBOSOMAL SMALL SUBUNIT BIOGENESIS
Toll-Like Receptor & Pattern-Recognition Signaling	4	-4	-0.2959	0.0003	CDH13|TNFRSF11A|TNFSF11|EDN3|TNFSF4|S1PR1|DSCAM|SEMA5A|SERPINF2|EDN2|FEM1A|HYAL2|EMILIN1|ITGA2|EMILIN2|CSF1|SLIT2|SMAD3|F7|PUM1|EREG|PUM2|ETS1|MEGF8|SRC|MIR221|DAPK2|MIR222|FGF16|FGF18|MSTN|SPI1|SWAP70|MAPKAPK2|MYD88|PTPN11|TAC1|RBM47|TIRAP|SASH1|TGFB1|TRADD|LPL|MDK|LAMP1|TMSB4X|APOH|GRN|AKIRIN1|THBS1|DDT|GPSM3|TRIM32|TPBG|ADAM17|MOSPD2|WNT5A|PLG|TRPV4|AKIRIN2|OXSR1|PDGFD|TYROBP|ZNF580|USP27X|KLK…	686	GOBP_POSITIVE_REGULATION_OF_RESPONSE_TO_EXTERNAL_STIMULUS	-1.566	0	GOBP_POSITIVE_REGULATION_OF_RESPONSE_TO_EXTERNAL_STIMULUS	POSITIVE REGULATION OF RESPONSE TO EXTERNAL STIMULUS
Toll-Like Receptor & Pattern-Recognition Signaling	3.22185	-3.22185	-0.4565	0.0096	CCDC134|NFKBIL1|NFKBIZ|TASL|CD300A|HSPD1|NLRP2B|CD300LF|NLRP6|TICAM1|TICAM2|HSP90B1|TIFAB|TLR1|TLR10|TLR2|TLR3|TLR4|TLR5|TLR6|TLR7|TLR8|TLR9|CD36|IKBKB|OTUD4|TNIP1|TNIP3|IRAK1|TRAF3|IRAK2|IRAK3|TRAF6|IRAK4|PDPK1|IRF1|IRF3|IRF4|PLCG2|IRF7|TYRO3|CTSS|UNC93B1|MAPKAPK2|AP3B1|MYD88|APP|RAB11FIP2|ARRB2|LGR4|TIRAP|BCL10|REG3G|RELA|BIRC2|BIRC3|LRCH4|PRKCE|LRRC14|LRRC19|RNF115|ESR1|LY96|BTK|MAP3K7|RPS6KA3…	84	GOBP_TOLL_LIKE_RECEPTOR_SIGNALING_PATHWAY	-1.8202	0.0006	GOBP_TOLL_LIKE_RECEPTOR_SIGNALING_PATHWAY	TOLL LIKE RECEPTOR SIGNALING PATHWAY
Toll-Like Receptor & Pattern-Recognition Signaling	4	-4	-0.281	0.0028	SIGIRR|SPN|EMILIN1|EMILIN2|PUM1|EREG|PUM2|ZC3H12A|SRC|PPARG|SPI1|MAPKAPK2|MYD88|PML|PTPN11|RBM47|TIRAP|APOE|SASH1|TGFB1|GATA6|LAMP1|NECTIN4|GRN|TRIM38|TRIM32|NCF1|WNT5A|AHR|YTHDF3|AKIRIN2|ARG2|TYROBP|USP27X|KLK5|CARD9|WASHC4|CD1D|GIGYF2|CCDC92|EVPL|CD300C|CD300E|CD300H|CD37|CD96|KLK7|CD36|PGC|CEP63|CLEC12B|CLNK|CNOT7|DRD2|DUSP10|EIF2AK4|KLK3|DCST1|ERAP1|CXCL6|DDX39A|FBXO38|NFE2L2|P2RX7|RASGRP4|DE…	593	GOBP_REGULATION_OF_RESPONSE_TO_BIOTIC_STIMULUS	-1.4832	0.0001	GOBP_REGULATION_OF_RESPONSE_TO_BIOTIC_STIMULUS	REGULATION OF RESPONSE TO BIOTIC STIMULUS
Toll-Like Receptor & Pattern-Recognition Signaling	2.36653	-2.36653	-0.2955	0.0409	HLA-A|HLA-DPB1|HLA-DQB1|HLA-DRB1|HLA-DRB3|IFI35|IFNG|IGHA1|IGHA2|SH2B2|IGHD|IGHE|IGHG1|IGHG2|IGHG3|IGHG4|IGHM|IGKC|IGLC1|IGLC3|IGLC6|IGLC7|IKBKB|IKBKG|INPP5D|IRAK1|IRAK2|IRAK4|IRF3|RC3H1|ZC3H12A|ITGAM|ITK|ITPRIPL1|SRC|KCNN4|KHDRBS1|KIR2DS2|KLHL6|KLRC1|CD33|KLRC2|KLRC3|KLRC4|KLRC4-KLRK1|KLRD1|KLRK1|LAT|LAT2|MYD88|LAX1|LBP|LCK|LCP2|LETMD1|LGALS3|TIRAP|BCAR1|LILRA2|LILRA4|BCL2|LIME1|LIPA|LPXN|MAPK10…	380	GOBP_IMMUNE_RESPONSE_REGULATING_CELL_SURFACE_RECEPTOR_SIGNALING_PATHWAY	-1.4509	0.0043	GOBP_IMMUNE_RESPONSE_REGULATING_CELL_SURFACE_RECEPTOR_SIGNALING_PATHWAY	IMMUNE RESPONSE REGULATING CELL SURFACE RECEPTOR SIGNALING PATHWAY
Toll-Like Receptor & Pattern-Recognition Signaling	3.1549	-3.1549	-0.4684	0.0109	HMGB1|CD14|NFKBIA|NINJ1|TAX1BP1|TBK1|LGALS9|IFI35|TICAM1|TICAM2|NMI|TLR1|TLR2|NR1D1|TLR4|NR1H3|TLR5|TLR6|OAS1|TMEM126A|TNFAIP3|TNIP2|TNIP3|PELI1|IRAK1|TRAF3|IRAK2|PIK3AP1|TRAF6|CHUK|IRAK4|PJA2|IRF3|TREM2|TRIL|PIK3R1|CYBA|PTPN22|ACOD1|DAB2IP|MYD88|APPL1|APPL2|LBP|RAB11FIP2|ECSIT|RAB7B|LETMD1|WDFY1|TIRAP|LILRA2|MIR149|MIR20A|RELA|PRKCE|RIPK2|BPIFB1|LTF|LY96|LYN|F2RL1|MAP3K7|ZNRF1|S100A14|FLOT1|SCIM…	76	GOBP_CELL_SURFACE_TOLL_LIKE_RECEPTOR_SIGNALING_PATHWAY	-1.8091	0.0007	GOBP_CELL_SURFACE_TOLL_LIKE_RECEPTOR_SIGNALING_PATHWAY	CELL SURFACE TOLL LIKE RECEPTOR SIGNALING PATHWAY
Toll-Like Receptor & Pattern-Recognition Signaling	2.85387	-2.85387	-0.2905	0.0176	EMILIN1|EMILIN2|PUM1|EREG|PUM2|SRC|SPI1|MAPKAPK2|MYD88|PTPN11|RBM47|TIRAP|SASH1|LAMP1|GRN|TRIM32|WNT5A|AKIRIN2|TYROBP|USP27X|KLK5|CARD9|WASHC4|CD1D|KLK7|CD36|PGC|CLNK|KLK3|FBXO38|P2RX7|RASGRP4|PLA2G5|TRIM62|TNF|MED1|HLA-F|HLA-G|HPX|KCNJ8|IFNB1|IFNK|YWHAE|ARG1|CADM1|CD274|CRTAM|FADD|FYN|HMGB1|IL12B|LGALS9|RPS19|MMRN2|STAT5A|STAT5B|AKT1|KIR2DL4|NECTIN2|TRIM6|LY86|RASGRP1|AARS2|ABHD17A|ABHD8|ACOD1|A…	442	GOBP_POSITIVE_REGULATION_OF_RESPONSE_TO_BIOTIC_STIMULUS	-1.4878	0.0014	GOBP_POSITIVE_REGULATION_OF_RESPONSE_TO_BIOTIC_STIMULUS	POSITIVE REGULATION OF RESPONSE TO BIOTIC STIMULUS
Toll-Like Receptor & Pattern-Recognition Signaling	4	-4	-0.3026	0.0012	PUM1|EREG|PUM2|SRC|PPARG|SPI1|MAPKAPK2|MYD88|PTPN11|RBM47|TIRAP|APOE|TGFB1|LAMP1|NECTIN4|GRN|TRIM32|NCF1|WNT5A|YTHDF3|AKIRIN2|TYROBP|USP27X|CARD9|WASHC4|CD1D|GIGYF2|CD300C|CD300E|CD300H|CD96|CD36|CEP63|CLEC12B|CLNK|CNOT7|DRD2|DUSP10|DCST1|ERAP1|DDX39A|NFE2L2|P2RX7|RASGRP4|LRP8|PLA2G5|TRIM62|TNF|HLA-B|MED1|HLA-F|HLA-G|DTX4|EIF4E2|HPX|KCNJ8|MIR181B1|IFNB1|IFNK|YWHAE|ARG1|CADM1|CD274|CRTAM|FADD|FYN|…	497	GOBP_REGULATION_OF_INNATE_IMMUNE_RESPONSE	-1.5598	0.0001	GOBP_REGULATION_OF_INNATE_IMMUNE_RESPONSE	REGULATION OF INNATE IMMUNE RESPONSE
Toll-Like Receptor & Pattern-Recognition Signaling	3.1549	-3.1549	-0.2728	0.0109	SH2B2|PUM1|PUM2|RC3H1|ZC3H12A|SRC|MAPKAPK2|MYD88|TIRAP|TRIM32|TYROBP|WASHC4|CACNB3|CD36|CACNB4|P2RX7|TNF|KCNJ8|PSEN1|YWHAE|BTN2A2|BTN3A1|CD274|FOXP3|FYN|HHLA2|HMGB1|ICOSLG|LAPTM5|LGALS9|LILRB4|PRNP|RPS3|AKT1|SIVA1|NECTIN2|TMIGD3|A2M|AARS2|ABHD17A|ABHD8|ACOD1|ADA|AIM2|ALPK1|ANKRD17|AP3B1|APP|APPL1|APPL2|ARRB2|ATAT1|AURKB|BAG6|BANF1|BANK1|BAX|BCL10|BECN1|BIRC2|BIRC3|BLK|BLNK|BMX|BPIFB1|BRCC3|BTK|BT…	621	GOBP_ACTIVATION_OF_IMMUNE_RESPONSE	-1.4312	0.0007	GOBP_ACTIVATION_OF_IMMUNE_RESPONSE	ACTIVATION OF IMMUNE RESPONSE
Toll-Like Receptor & Pattern-Recognition Signaling	2.55284	-2.55284	-0.2649	0.0291	KIR2DL3|KIR2DL5A|KIR2DL5B|KIR2DS1|KIR2DS4|KIR2DS5|KIR3DL3|KIR3DX1|LAIR2|VSTM1|SH2B2|PUM1|PUM2|RC3H1|ZC3H12A|SRC|MAPKAPK2|MYD88|TIRAP|MAPK10|TRIM32|TYROBP|BTLA|WASHC4|CD40|CACNB3|CD36|CLEC4D|CACNB4|CLEC12B|CTSH|P2RX7|TNF|HLA-G|KCNJ8|PSEN1|YWHAE|BTN2A2|BTN3A1|CD24|CD274|FOXP3|FYN|HHLA2|HMGB1|ICOSLG|LAPTM5|LGALS9|LILRB4|PRNP|RPS3|AKT1|KIR2DL4|KIR3DL1|SIVA1|NECTIN2|LILRA5|TMIGD3|AARS2|ABHD17A|ABHD8|A…	617	GOBP_IMMUNE_RESPONSE_REGULATING_SIGNALING_PATHWAY	-1.3793	0.0028	GOBP_IMMUNE_RESPONSE_REGULATING_SIGNALING_PATHWAY	IMMUNE RESPONSE REGULATING SIGNALING PATHWAY
Toll-Like Receptor & Pattern-Recognition Signaling	4	-4	-0.3042	0.001	TNFRSF11A|TNFSF11|TNFSF4|FEM1A|HYAL2|EMILIN1|EMILIN2|PUM1|EREG|PUM2|ETS1|SRC|SPI1|MAPKAPK2|MYD88|TAC1|RBM47|TIRAP|TGFB1|TRADD|CRH|LPL|MDK|LAMP1|GRN|DDT|GPSM3|TRIM32|WNT5A|TRPV4|AKIRIN2|TYROBP|USP27X|KLK5|CARD9|CCR2|WASHC4|CD1D|HTR2A|KLK7|CD36|PGC|CTSC|CLNK|KLK3|MGST2|P2RX7|RASGRP4|PTGER3|DEFB114|PLA2G5|TRIM62|TNF|MED1|HLA-F|HLA-G|HPX|KCNJ8|MIR126|CCL1|NPY5R|MIR181B1|IFNB1|GBP3|IFNK|CCL3|MIR22|YWH…	556	GOBP_POSITIVE_REGULATION_OF_DEFENSE_RESPONSE	-1.5702	0	GOBP_POSITIVE_REGULATION_OF_DEFENSE_RESPONSE	POSITIVE REGULATION OF DEFENSE RESPONSE
Toll-Like Receptor & Pattern-Recognition Signaling	3	-3	-0.4503	0.0131	HMGB1|CD14|NFKBIA|SYK|NINJ1|TAX1BP1|TBK1|LGALS9|IFI35|TICAM1|TICAM2|NMI|TLR1|TLR2|NR1D1|TLR4|NR1H3|TLR5|TLR6|OAS1|TMEM126A|TNFAIP3|TNIP2|TNIP3|PELI1|IRAK1|TRAF3|IRAK2|PIK3AP1|TRAF6|CHUK|IRAK4|PJA2|IRF3|CLEC7A|TREM2|COLEC10|COLEC11|TRIL|PIK3R1|CYBA|PTPN22|ACOD1|DAB2IP|MYD88|APPL1|APPL2|LBP|RAB11FIP2|ECSIT|RAB7B|LETMD1|WDFY1|TIRAP|LILRA2|MIR149|MIR20A|RELA|PRKCE|RIPK2|BPIFB1|LTF|LY96|LYN|F2RL1|MAP3…	85	GOBP_CELL_SURFACE_PATTERN_RECOGNITION_RECEPTOR_SIGNALING_PATHWAY	-1.7696	0.001	GOBP_CELL_SURFACE_PATTERN_RECOGNITION_RECEPTOR_SIGNALING_PATHWAY	CELL SURFACE PATTERN RECOGNITION RECEPTOR SIGNALING PATHWAY
Toll-Like Receptor & Pattern-Recognition Signaling	2.38722	-2.38722	-0.5244	0.0394	CCDC134|APP|NFKBIL1|TASL|ARRB2|CD300A|LGR4|NLRP2B|CD300LF|NLRP6|BIRC2|HSP90B1|BIRC3|LRCH4|LRRC14|RNF115|ESR1|CD36|IKBKB|OTUD4|S100A8|S100A9|SARM1|IRAK3|PDPK1|IRF1|MFHAS1|IRF4|MIR146A|YWHAE|IRF7|MIR17|MIR19A|GDI1|GFI1|SMPDL3B|GPR108|CACTIN|TYRO3|GPS2	40	GOBP_REGULATION_OF_TOLL_LIKE_RECEPTOR_SIGNALING_PATHWAY	-1.7935	0.0041	GOBP_REGULATION_OF_TOLL_LIKE_RECEPTOR_SIGNALING_PATHWAY	REGULATION OF TOLL LIKE RECEPTOR SIGNALING PATHWAY
Transcription by RNAPolIII	4	4	0.7722	0.0002	RPTOR|INHBA|SF3B1|ELL|ZNF143|AR|SMARCA5|BAZ1B|ICE1|ERCC6|ZC3H8|CHD8|DDX21|DEK|ICE2|MYO1C|MTOR|MYBBP1A	18	GOBP_POSITIVE_REGULATION_OF_TRANSCRIPTION_BY_RNA_POLYMERASE_III	2.2617	0	GOBP_POSITIVE_REGULATION_OF_TRANSCRIPTION_BY_RNA_POLYMERASE_III	POSITIVE REGULATION OF TRANSCRIPTION BY RNA POLYMERASE III
Transcription by RNAPolIII	2.5376	2.5376	0.5496	0.0302	ZNF143|MAF1|NAB2|TENM1|BAZ1B|ERCC6|ZC3H8|DEK|ICE2|ZNF76|ZNF345|MTOR|RPTOR|INHBA|SF3B1|DHX36|ELL|AR|SMARCA5|SETD5|BRF2|ICE1|CHD8|PRDX5|DDX21|POLR3C|MYO1C|POLR3F|POLR3G|MYBBP1A	30	GOBP_REGULATION_OF_TRANSCRIPTION_BY_RNA_POLYMERASE_III	1.8693	0.0029	GOBP_REGULATION_OF_TRANSCRIPTION_BY_RNA_POLYMERASE_III	REGULATION OF TRANSCRIPTION BY RNA POLYMERASE III
Type 2 immune response	3.22185	-3.22185	-0.5718	0.0096	IL33|IL4|KMT2A|XCL1|PRKCZ|BATF|IDO1|IL4R|BCL3|MEN1|DENND1B|IFNL1|MYB|TNFSF4|IL18|STARD7|CCR2|RARA|BCL6B|FCER1A|NLRP3|ECM1|BCL6|NOD2|IGHE|HLX|CD74|ANXA1|CD81|CD86|RSAD2|IFNA2|IL6|SOCS5|STAT6|IFNB1|NDFIP1|TBX21|GATA3|ARG1|IL10|TRAF3IP2|ARG2|ASCL2|IL27RA	45	GOBP_TYPE_2_IMMUNE_RESPONSE	-1.9413	0.0006	GOBP_TYPE_2_IMMUNE_RESPONSE	TYPE 2 IMMUNE RESPONSE
[truncated: 49 more rows]
